# Supplementary material for: Integrative metabolomics and proteomics reveal the effects and mechanisms of Salvia miltiorrhiza in alleviating traumatic blood stasis syndrome
Source: Frontiers journal article supplement (doi:10.3389/fvets.2025.1579790), 2025-04-25
Supplement: Table_1.xlsx [file Table_1.xlsx]

## Sheet: file explanation
Table head name	Characterization
ID	The unique data number of this substance in this qualitative analysis
MS2 name	Material names obtained from the qualitative matching analysis of the secondary mass spectrometry
MS2 score	The higher the score of the secondary match, the better
level	Qualitative substance grade
MS1 name	Name of the primary fragment ion matches, refer to the HMDB database or the KEGG database
MS1 ppm	The accuracy of the first level match, the value (-25,25), the closer to 0, the better
mz	The mass-charge ratio of material characteristic ions
rt	The chromatographic retention time of this material
type	Acquisition mode
VIP	The substance contrasts the variable projection significance of the OPLS-DA model in this group
P-VALUE	The P value obtained by the t-test of the group, P value = the probability that the hypothesis is correct but rejected = number of negative results / total number of results, which is a test probability against the sample data
Q-VALUE	The hypothesis test statistic (P-value) is corrected by multiple hypothesis testing, Q value = rejected but correct probability = number of false positive results / number of inferred positive results, is a test probability of the inference obtained by the statistical test, and a restatistic of the P-value
FOLD CHANGE	The multiple relationship of the substance in the group between the two experiments
LOG_FOLDCHANGE	FOLD CHANGE Take the log at base 2
Formula	The chemical composition of the substance
HMDB	The substance is indexed in the HMDB database
Chinese.Name	The Chinese name of the substance in the database
CAS	The CAS number of the substance
KEGG COMPOUND ID	The index of the substance in the KEGG COMPOUND database
Super.Class	The secondary classification of the substance in the HMDB database
Superclass.Chinese	The Chinese name for the secondary classification of the substance in the HMDB database
Class	Tertiary classification of the substance in the HMDB database
Class.Chinese	Third-class Chinese name of the substance in the HMDB database
Sub.Class	The substance in the HMDB database
Subclass.Chinese	The substance is the level 4 classification in the HMDB database
NC_1	Relative quantitative values of the NC_1
NC_2	Relative quantitative values of the NC_2
NC_3	Relative quantitative values of the NC_3
Mean NC	Mean of relative quantitative values of repeated experiments on NC samples
TBSS_1	Relative quantitative values of the TBSS_1
TBSS_2	Relative quantitative values of the TBSS_2
TBSS_3	Relative quantitative values of the TBSS_3
Mean TBSS	Mean of relative quantitative values of repeated experiments on TBSS samples
SM_1	Relative quantitative values of the SM_1
SM_2	Relative quantitative values of the SM_2
SM_3	Relative quantitative values of the SM_3
Mean SM	Mean of relative quantitative values of repeated experiments on SM samples

## Sheet: TBSS vs. NC
ID	MS2 name	MS2 score	level	MS1 name	MS1 ppm	mz	rt	type	Formula	HMDB	Chinese.Name	CAS	KEGG COMPOUND ID	Super.Class	Superclass.Chinese	Class	Class.Chinese	Sub.Class	Subclass.Chinese	NC_1	NC_2	NC_3	MEAN NC	TBSS_1	TBSS_2	TBSS_3	MEAN TBSS	VIP	P-VALUE	Q-VALUE	FOLD CHANGE	LOG_FOLDCHANGE
1	PC(18:1(6Z)/18:1(6Z))	3.98	level1			786.6	143.9	POS	C44H84NO8P		1,2 -双- [ ( 6Z ) -十八烯酰基] -sn-甘油-3 -磷酸胆碱	56391-91-4		Lipids and lipid-like molecules	脂质和类脂分子	Glycerophospholipids	甘油磷脂类	Glycerophosphocholines	甘油磷酸胆碱	0.483517	0.824723	1.01085	0.77303	1.40339	0.611726	0.317758	0.777624	0.390733	0.990407	0.999955	1.00594	0.00854691
2	PC(18:1(9Z)/18:1(9Z))	3.97	level1			786.6	143.9	POS	C44H84NO8P	HMDB0000593	1，2 -二油酰基- sn -甘油-3 -磷酸胆碱	4235-95-4		Lipids and lipid-like molecules	脂质和类脂分子	Glycerophospholipids	甘油磷脂类	Glycerophosphocholines	甘油磷酸胆碱	0.483517	0.824723	1.01085	0.77303	1.40339	0.611726	0.317758	0.777624	0.390733	0.990407	0.999955	1.00594	0.00854691
3	PC(18:1(9E)/18:1(9E))	3.97	level1			786.6	143.9	POS	C44H84NO8P	HMDB0000593	二油酸磷脂酰胆碱	56782-46-8		Lipids and lipid-like molecules	脂质和类脂分子	Glycerophospholipids	甘油磷脂类	Glycerophosphocholines	甘油磷酸胆碱	0.483517	0.824723	1.01085	0.77303	1.40339	0.611726	0.317758	0.777624	0.390733	0.990407	0.999955	1.00594	0.00854691
4	Hygric acid	3.96	level1			130.086	293.7	POS	C6H11NO2	HMDB0094696	N -甲基- L -脯氨酸	475-11-6	C22223	Organic acids and derivatives	有机酸及其衍生物	Carboxylic acids and derivatives	羧酸及衍生物	Amino acids, peptides, and analogues	氨基酸、肽和类似物	0.590714	0.881675	0.914982	0.79579	0.883278	1.01002	0.651709	0.848335	0.400083	0.738828	0.984009	1.06603	0.0922461
5	1-Methylpyrrolidine	3.96	level1			86.0963	43.8	POS	C5H11N	HMDB0243946	1-甲基吡咯烷	120-94-5		Organoheterocyclic compounds	有机杂环化合物	Pyrrolidines	吡咯烷	N-alkylpyrrolidines	N-烷基吡咯烷	3.61704	1.29082	2.10661	2.33816	3.41391	2.49534e-05	2.5983	2.00408	0.966311	0.800064	0.99393	0.857119	-0.222433
6	Amifampridine	3.95	level1			110.071	232.1	POS	C5H7N3	HMDB0246022	3,4-二氨基吡啶	54-96-6	D10228	Organoheterocyclic compounds	有机杂环化合物	Pyridines and derivatives	吡啶及衍生物	Aminopyridines and derivatives	氨基吡啶及衍生物	1.13715	0.67299	1.13058	0.980242	1.33057	2.49534e-05	1.06367	0.798088	0.982458	0.696568	0.977525	0.814175	-0.29659
7	Allopurinol	3.95	level1			137.046	74.1	POS	C5H4N4O	HMDB0014581		315-30-0		Organoheterocyclic compounds	有机杂环化合物	Pyrazolopyrimidines	吡唑并嘧啶	Pyrazolo[3,4-d]pyrimidines	吡唑并[3,4-d]嘧啶	17.3348	15.0681	7.84297	13.4153	11.3092	17.7694	13.6826	14.2538	0.379739	0.818797	0.997427	1.0625	0.0874647
8	Isocaproic acid	3.95	level1			115.076	65.9	NEG	C6H12O2	HMDB0000689	4-甲基戊酸	646-07-1	C21399	Lipids and lipid-like molecules	脂质和类脂分子	Fatty Acyls	脂肪酰类	Fatty acids and conjugates	脂肪酸和聚合物	0.828055	1.2583	1.33196	1.13944	1.16404	0.234913	0.976298	0.791751	1.04724	0.343998	0.962514	0.694862	-0.525202
9	2-Piperidone	3.95	level1			100.076	42.9	POS	C5H9NO	HMDB0011749	2-哌啶酮	675-20-7		Organoheterocyclic compounds	有机杂环化合物	Piperidines	哌啶	Piperidinones	哌啶酮	0.230949	0.360049	1.48548	0.692158	0.199355	0.471564	2.27096	0.980626	0.375039	0.724356	0.982317	1.41677	0.502601
10	Allopurinol-1-ribonucleoside	3.93	level1			269.088	118.8	POS	C10H12N4O5	HMDB0000481	别嘌醇核苷	16220-07-8		Nucleosides, nucleotides, and analogues	核苷、核苷酸和类似物	Pyrazolo[3,4-d]pyrimidine glycosides	吡唑并[3,4-d]嘧啶糖苷类	Pyrazolo[3,4-d]pyrimidine glycosides	吡唑并[3,4-d]嘧啶糖苷类	0.444271	0.344408	0.101363	0.296681	0.165003	0.450845	0.6866	0.434149	0.736044	0.492007	0.962514	1.46335	0.549279
11	Tetraethylene glycol	3.93	level1			195.122	42.3	POS	C8H18O5	HMDB0094708	四甘醇	112-60-7		Organic oxygen compounds	有机含氧化合物	Organooxygen compounds	有机氧化合物	Ethers	醚	2.19895	1.65181	1.85893	1.90323	2.1961	2.62188	2.34116e-05	1.606	1.04894	0.737719	0.984009	0.84383	-0.244975
12	PC(16:0/18:1(9Z))	3.93	level1			742.574	34.8	POS	C42H82NO8P	HMDB0007972	2 -油酰基- 1 -棕榈酰基- sn -甘油-3 -磷酸胆碱		C13875	Lipids and lipid-like molecules	脂质和类脂分子	Glycerophospholipids	甘油磷脂类	Glycerophosphocholines	甘油磷酸胆碱	2.05499	1.16817	1.66556	1.62957	2.38091e-05	1.17777	0.918011	0.698601	0.962136	0.101746	0.962514	0.428702	-1.22195
13	Adenine	3.92	level1			136.062	155.5	POS	C5H5N5	HMDB0000034	腺嘌呤	73-24-5	C00147	Organoheterocyclic compounds	有机杂环化合物	Imidazopyrimidines	咪唑并嘧啶	Purines and purine derivatives	嘌呤和嘌呤衍生物	0.11883	0.224816	0.0224098	0.122018	0.218392	0.0668482	0.166346	0.150529	0.592714	0.717623	0.981508	1.23365	0.302938
14	Dihydroxyacetone	3.92	level1			89.024	123.7	NEG	C3H6O3	HMDB0001882	二羟丙酮	96-26-4	C00184	Organic oxygen compounds	有机含氧化合物	Organooxygen compounds	有机氧化合物	Carbohydrates and carbohydrate conjugates	碳水化合物和碳水化合物结合物	29.6778	26.9456	29.8681	28.8305	32.457	31.8377	24.6792	29.658	0.130292	0.77196	0.988912	1.0287	0.0408254
15	3-(2-Hydroxyphenyl)propanoic acid	3.92	level1			165.055	62.1	NEG	C9H10O3	HMDB0033752	2 -羟基苯丙酸	495-78-3	C01198	Phenylpropanoids and polyketides	苯丙素类和聚酮类	Phenylpropanoic acids	苯丙酸类	Phenylpropanoic acids	苯丙酸类	0.0599663	6.18187e-06	0.0250888	0.0283538	0.0182812	0.0672157	6.43614e-06	0.0285011	0.122794	0.995838	0.999955	1.0052	0.00747638
16	Pentaethylene glycol	3.92	level1			239.149	42.8	POS	C10H22O6	HMDB0256256	五甘醇	4792-15-8		Organic oxygen compounds	有机含氧化合物	Organooxygen compounds	有机氧化合物	Ethers	醚	1.77547	1.35234	1.12704	1.41828	1.38539	1.86929	1.94143	1.73203	1.18145	0.29092	0.962514	1.22122	0.288322
17	Butanoic acid	3.91	level1			87.0447	104.4	NEG	C4H8O2	HMDB0000039	丁酸	107-92-6	C00246	Lipids and lipid-like molecules	脂质和类脂分子	Fatty Acyls	脂肪酰类	Fatty acids and conjugates	脂肪酸和聚合物	0.153213	0.155711	0.100347	0.136424	0.103131	0.0730772	0.163726	0.113311	0.80959	0.512531	0.962514	0.830584	-0.267801
18	HMMNI	3.91	level1			140.045	46.9	POS	C5H7N3O3	HMDB0247667		936-05-0		Organoheterocyclic compounds	有机杂环化合物	Azoles	吡咯类	Imidazoles	咪唑	2.77782	1.62281	5.03734	3.14599	4.82573	3.77767	5.61339	4.73893	1.31537	0.233135	0.962514	1.50634	0.591048
19	4-Allylcatechol	3.91	level1			149.06	37.3	NEG	C9H10O2		4-烯丙基儿茶酚	1126-61-0		Benzenoids	苯环型化合物	Phenols	酚类	Benzenediols	苯二酚	0.0229714	0.0259412	0.0146068	0.0211731	0.0122569	6.39171e-06	0.0202335	0.0108323	1.09869	0.202484	0.962514	0.511605	-0.966898
20	2'-Hydroxy-5'-methylacetophenone	3.91	level1			149.06	37.3	NEG	C9H10O2	HMDB0032592	2 ' -羟基- 5 ' -甲基苯乙酮	1450-72-2		Organic oxygen compounds	有机含氧化合物	Organooxygen compounds	有机氧化合物	Carbonyl compounds	羰基化合物	0.0229714	0.0259412	0.0146068	0.0211731	0.0122569	6.39171e-06	0.0202335	0.0108323	1.09869	0.202484	0.962514	0.511605	-0.966898
21	PC(16:0/16:0)	3.91	level1			734.568	37.6	POS	C40H80NO8P	HMDB0000564	棕榈胆磷	63-89-8		Lipids and lipid-like molecules	脂质和类脂分子	Glycerophospholipids	甘油磷脂类	Glycerophosphocholines	甘油磷酸胆碱	2.7941	3.29029	2.09213	2.7255	2.01915	1.18327	3.11081	2.10441	0.993797	0.398304	0.962514	0.772118	-0.373107
22	Caproic acid	3.9	level1			115.076	65.9	NEG	C6H12O2	HMDB0000535	己酸	142-62-1	C01585	Lipids and lipid-like molecules	脂质和类脂分子	Fatty Acyls	脂肪酰类	Fatty acids and conjugates	脂肪酸和聚合物	0.828055	1.2583	1.33196	1.13944	1.16404	0.234913	0.976298	0.791751	1.04724	0.343998	0.962514	0.694862	-0.525202
23	2,6-Dimethyl-4-hydroxybenzaldehyde	3.9	level1			149.06	37.3	NEG	C9H10O2		2,6-二甲基-4-羟基苯甲醛	70547-87-4		Organic oxygen compounds	有机含氧化合物	Organooxygen compounds	有机氧化合物	Carbonyl compounds	羰基化合物	0.0229714	0.0259412	0.0146068	0.0211731	0.0122569	6.39171e-06	0.0202335	0.0108323	1.09869	0.202484	0.962514	0.511605	-0.966898
24	4'-Hydroxy-3'-methylacetophenone	3.9	level1			149.06	37.3	NEG	C9H10O2	HMDB0059824	4 ' -羟基- 3 ' -甲基苯乙酮	876-02-8		Organic oxygen compounds	有机含氧化合物	Organooxygen compounds	有机氧化合物	Carbonyl compounds	羰基化合物	0.0229714	0.0259412	0.0146068	0.0211731	0.0122569	6.39171e-06	0.0202335	0.0108323	1.09869	0.202484	0.962514	0.511605	-0.966898
25	2'-Hydroxy-4'-methylacetophenone	3.9	level1			149.06	37.3	NEG	C9H10O2		2 ' -羟基- 4-甲基苯乙酮	6921-64-8		Organic oxygen compounds	有机含氧化合物	Organooxygen compounds	有机氧化合物	Carbonyl compounds	羰基化合物	0.0229714	0.0259412	0.0146068	0.0211731	0.0122569	6.39171e-06	0.0202335	0.0108323	1.09869	0.202484	0.962514	0.511605	-0.966898
26	Caprylic acid	3.9	level1			143.107	40.7	NEG	C8H16O2	HMDB0000482	辛酸	124-07-2	C06423	Lipids and lipid-like molecules	脂质和类脂分子	Fatty Acyls	脂肪酰类	Fatty acids and conjugates	脂肪酸和聚合物	3.14519	1.70259	4.24652	3.03143	4.23917	0.243972	3.22247	2.56853	0.761919	0.758658	0.986559	0.8473	-0.239055
27	3-hydroxybenzaldehyde	3.9	level1			121.029	39.9	NEG	C7H6O2		3-羟基苯甲醛	100-83-4	C03067	Organic oxygen compounds	有机含氧化合物	Organooxygen compounds	有机氧化合物	Carbonyl compounds	羰基化合物	0.26078	0.189777	0.178381	0.209646	0.224216	0.251766	6.43614e-06	0.158663	1.0681	0.575736	0.962912	0.756813	-0.401992
28	cis-9-Palmitoleic acid	3.9	level1			253.216	39.1	NEG	C16H30O2	HMDB0003229	棕榈油酸	373-49-9	C08362	Lipids and lipid-like molecules	脂质和类脂分子	Fatty Acyls	脂肪酰类	Fatty acids and conjugates	脂肪酸和聚合物	0.133287	0.0681887	0.264828	0.155434	0.218747	0.185385	0.134139	0.179424	0.644722	0.722106	0.982069	1.15434	0.207065
29	Palmitic acid	3.9	level1			255.232	39.1	NEG	C16H32O2	HMDB0000220	棕榈酸	21096	C00249	Lipids and lipid-like molecules	脂质和类脂分子	Fatty Acyls	脂肪酰类	Fatty acids and conjugates	脂肪酸和聚合物	1.39071	1.48283	6.34955e-06	0.957851	6.30815e-06	1.49748	1.17542	0.89097	0.0595484	0.924297	0.999955	0.930176	-0.104424
30	3',4'-Dihydroxyacetophenone	3.9	level1			151.039	37.9	NEG	C8H8O3	HMDB0029661	3 '，4 ' -二羟基苯乙酮	1197-09-7	C10675	Organic oxygen compounds	有机含氧化合物	Organooxygen compounds	有机氧化合物	Carbonyl compounds	羰基化合物	0.126577	0.143646	0.0788154	0.116346	0.077436	0.0627512	0.127012	0.0890665	0.972334	0.376817	0.962514	0.76553	-0.385469
31	Stearic acid	3.9	level1			283.263	39.1	NEG	C18H36O2	HMDB0000827	硬脂酸	21128	C01530	Lipids and lipid-like molecules	脂质和类脂分子	Fatty Acyls	脂肪酰类	Fatty acids and conjugates	脂肪酸和聚合物	0.325009	0.35831	0.379809	0.354376	0.371726	0.313132	6.43614e-06	0.228288	1.10579	0.388632	0.962514	0.644197	-0.634427
32	4′-Hydroxy-2′-methylacetophenone	3.89	level1			149.06	37.3	NEG	C9H10O2		4 -羟基-2-甲基苯乙酮	875-59-2		Organic oxygen compounds	有机含氧化合物	Organooxygen compounds	有机氧化合物	Carbonyl compounds	羰基化合物	0.0229714	0.0259412	0.0146068	0.0211731	0.0122569	6.39171e-06	0.0202335	0.0108323	1.09869	0.202484	0.962514	0.511605	-0.966898
33	4-Hydroxybenzaldehyde	3.89	level1			121.029	39.9	NEG	C7H6O2	HMDB0011718	4-羟基苯甲醛	123-08-0	C00633	Organic oxygen compounds	有机含氧化合物	Organooxygen compounds	有机氧化合物	Carbonyl compounds	羰基化合物	0.26078	0.189777	0.178381	0.209646	0.224216	0.251766	6.43614e-06	0.158663	1.0681	0.575736	0.962912	0.756813	-0.401992
34	3-Diethylaminophenol	3.89	level1			166.123	16.9	POS	C10H15NO		3 - (二乙氨基)苯酚	91-68-9		Organic nitrogen compounds	有机含氮化合物	Organonitrogen compounds	有机氮化合物	Amines	胺	0.059595	2.21526e-05	0.0797697	0.0464623	0.0749489	0.0703967	0.095127	0.0801575	1.00025	0.25084	0.962514	1.72522	0.786778
35	Valproic acid	3.88	level1			143.107	40.7	NEG	C8H16O2	HMDB0001877	丙戊酸	99-66-1	C07185	Lipids and lipid-like molecules	脂质和类脂分子	Fatty Acyls	脂肪酰类	Fatty acids and conjugates	脂肪酸和聚合物	3.14519	1.70259	4.24652	3.03143	4.23917	0.243972	3.22247	2.56853	0.761919	0.758658	0.986559	0.8473	-0.239055
36	4-Methylsalicylic acid	3.88	level1			151.039	37.9	NEG	C8H8O3		4-甲基水杨酸	50-85-1	C14103	Benzenoids	苯环型化合物	Benzene and substituted derivatives	苯和取代衍生物	Benzoic acids and derivatives	苯甲酸及衍生物	0.126577	0.143646	0.0788154	0.116346	0.077436	0.0627512	0.127012	0.0890665	0.972334	0.376817	0.962514	0.76553	-0.385469
37	Betaine aldehyde	3.88	level1			102.091	292.9	POS	C5H12NO	HMDB0001252	甜菜醛	7418-61-3	C00576	Organic nitrogen compounds	有机含氮化合物	Organonitrogen compounds	有机氮化合物	Quaternary ammonium salts	季铵盐	0.110531	0.150756	0.180887	0.147392	0.151879	0.182749	0.137244	0.157291	0.574647	0.705679	0.97951	1.06716	0.0937826
38	Pyruvate	3.88	level1			87.0084	123.3	NEG	C3H4O3	HMDB0000243	丙酮酸	127-17-3	C00022	Organic acids and derivatives	有机酸及其衍生物	Keto acids and derivatives	酮酸及衍生物	Alpha-keto acids and derivatives	Alpha-酮酸及衍生物	0.112913	0.150188	0.163214	0.142105	0.168098	0.160673	0.134321	0.154364	0.737125	0.538049	0.962514	1.08627	0.119383
39	Oleamide	3.88	level1			282.279	16.5	POS	C18H35NO	HMDB0002117	油酸酰胺	301-02-0	C19670	Lipids and lipid-like molecules	脂质和类脂分子	Fatty Acyls	脂肪酰类	Fatty amides	脂肪酸酰胺	0.247686	0.226912	0.234243	0.236281	2.38091e-05	0.259186	0.269963	0.176391	0.834701	0.567579	0.962514	0.746532	-0.421724
40	Propionic acid	3.87	level1			73.0292	175.8	NEG	C3H6O2	HMDB0000237	丙酸	29102	C00163	Organic acids and derivatives	有机酸及其衍生物	Carboxylic acids and derivatives	羧酸及衍生物	Carboxylic acids	羧酸	0.047818	6.18187e-06	0.048635	0.0321531	0.0504034	0.0530017	6.43614e-06	0.0344705	0.0977023	0.926432	0.999955	1.07208	0.100406
41	Fucose	3.87	level1			187.058	171	POS	C6H12O5	HMDB0000174	L-(-)-岩藻糖	2438-80-4	C01019	Organic oxygen compounds	有机含氧化合物	Organooxygen compounds	有机氧化合物	Carbohydrates and carbohydrate conjugates	碳水化合物和碳水化合物结合物	0.0675223	0.0412603	0.0567506	0.0551777	0.0593312	0.0804493	0.087295	0.0756918	1.49178	0.145094	0.962514	1.37178	0.456051
42	Ethyl 3-hydroxybenzoate	3.87	level1			165.055	38.3	NEG	C9H10O3		3 -羟基苯甲酸乙酯	7781-98-8		Benzenoids	苯环型化合物	Benzene and substituted derivatives	苯和取代衍生物	Benzoic acids and derivatives	苯甲酸及衍生物	6.87516e-06	1.88544	0.310572	0.732005	0.290844	0.227703	3.04163	1.18673	1.02192	0.6995	0.978199	1.6212	0.697061
43	Tris(2,4-di-tert-butylphenyl)phosphate	3.87	level1			663.453	15.8	POS	C42H63O4P		三( 2 , 4 -二叔丁基苯基)磷酸	31570-04-4		Organic acids and derivatives	有机酸及其衍生物	Organic phosphoric acids and derivatives	有机磷酸及衍生物	Phosphate esters	磷酸酯	3.35131	2.66177	3.13418	3.04909	3.28172	2.49534e-05	3.10691	2.12955	1.01997	0.444535	0.962514	0.698423	-0.517827
44	Ethyl 4-hydroxybenzoate	3.86	level1			165.055	38.3	NEG	C9H10O3	HMDB0032573	对羟基苯甲酸乙酯	120-47-8	D01647	Benzenoids	苯环型化合物	Benzene and substituted derivatives	苯和取代衍生物	Benzoic acids and derivatives	苯甲酸及衍生物	6.87516e-06	1.88544	0.310572	0.732005	0.290844	0.227703	3.04163	1.18673	1.02192	0.6995	0.978199	1.6212	0.697061
45	Pyroglutamic acid	3.86	level1			130.05	307.1	POS	C5H7NO3	HMDB0000267	L-焦谷氨酸	98-79-3	C01879	Organic acids and derivatives	有机酸及其衍生物	Carboxylic acids and derivatives	羧酸及衍生物	Amino acids, peptides, and analogues	氨基酸、肽和类似物	0.446995	0.354645	0.428944	0.410195	0.419874	0.467389	0.388047	0.425103	0.394236	0.70363	0.979286	1.03635	0.0515044
46	4-Chromanone	3.86	level1			147.044	38.3	NEG	C9H8O2		4-色满酮	491-37-2		Organoheterocyclic compounds	有机杂环化合物	Benzopyrans	苯并吡喃	1-benzopyrans	1-苯并吡喃	6.87516e-06	0.0793757	0.0130407	0.0308078	0.0112737	0.0125643	0.126585	0.0501409	1.00863	0.692399	0.976618	1.62754	0.702693
47	Embelin	3.86	level1			293.175	25.1	NEG	C17H26O4	HMDB0251767	恩贝酸	550-24-3	C10342	Organic oxygen compounds	有机含氧化合物	Organooxygen compounds	有机氧化合物	Carbonyl compounds	羰基化合物	0.88308	6.18187e-06	0.805691	0.562926	1.18902	6.39171e-06	0.959101	0.716043	0.0276644	0.756338	0.986238	1.272	0.347101
48	3-Cresol	3.86	level1			107.05	24.1	NEG	C7H8O	HMDB0002048	间甲酚	108-39-4	C01467	Benzenoids	苯环型化合物	Phenols	酚类	Cresols	甲酚	0.0748854	0.0788767	6.34955e-06	0.0512561	6.30815e-06	6.39171e-06	0.0692707	0.0230945	0.711317	0.460297	0.962514	0.45057	-1.15018
49	gamma-Linolenic acid	3.86	level1			277.216	23	NEG	C18H30O2	HMDB0003073	γ-亚麻酸	506-26-3	C06426	Lipids and lipid-like molecules	脂质和类脂分子	Fatty Acyls	脂肪酰类	Lineolic acids and derivatives	亚油酸及衍生物	0.555806	0.285895	6.34955e-06	0.280569	6.30815e-06	1.01312	0.386157	0.466427	0.13046	0.609617	0.964967	1.66243	0.733295
50	5-Hydroxyindole	3.86	level1			134.06	15.4	POS	C8H7NO	HMDB0059805	5-羟基吲哚	1953-54-4		Organoheterocyclic compounds	有机杂环化合物	Indoles and derivatives	吲哚和衍生物	Hydroxyindoles	羟基吲哚	0.0181509	0.13216	0.330783	0.160365	0.347605	2.49534e-05	0.293587	0.213739	0.638637	0.725072	0.982317	1.33283	0.414494
51	Laurocapram	3.85	level1			282.279	16.5	POS	C18H35NO	HMDB0253992	月桂氮酮	59227-89-3	D04678	Organoheterocyclic compounds	有机杂环化合物	Lactams	内酰胺	Caprolactams	己内酰胺	0.247686	0.226912	0.234243	0.236281	2.38091e-05	0.259186	0.269963	0.176391	0.834701	0.567579	0.962514	0.746532	-0.421724
52	2-Methylphenol	3.85	level1			107.05	24.1	NEG	C7H8O	HMDB0002055	邻甲酚	95-48-7	C01542	Benzenoids	苯环型化合物	Phenols	酚类	Cresols	甲酚	0.0748854	0.0788767	6.34955e-06	0.0512561	6.30815e-06	6.39171e-06	0.0692707	0.0230945	0.711317	0.460297	0.962514	0.45057	-1.15018
53	Guvacoline (hydrochloride)	3.85	level1			142.086	78.2	POS	C7H11NO2		去甲基槟榔碱	6197-39-3	C16821	Alkaloids and derivatives	生物碱和衍生物	Alkaloids and derivatives	生物碱和衍生物	Alkaloids and derivatives	生物碱和衍生物	0.370932	0.818396	0.762582	0.650637	0.778698	1.45452	1.00919	1.0808	1.5505	0.151695	0.962514	1.66115	0.732179
54	Indole-3-methyl acetate	3.85	level1			188.071	38.7	NEG	C11H11NO2	HMDB0029738	吲哚-3-乙酸甲酯	1912-33-0	C20635	Organoheterocyclic compounds	有机杂环化合物	Indoles and derivatives	吲哚和衍生物	Indolyl carboxylic acids and derivatives	吲哚基羧酸及衍生物	0.200177	6.18187e-06	0.0959035	0.0986956	0.0919168	0.170952	6.43614e-06	0.0876251	0.125659	0.891277	0.999955	0.887832	-0.171641
55	2,5-Di-tert-butylhydroquinone	3.85	level1			221.154	25.6	NEG	C14H22O2	HMDB0245492	2，5 -二特丁基对苯二酚	88-58-4		Benzenoids	苯环型化合物	Benzene and substituted derivatives	苯和取代衍生物	Phenylpropanes	苯丙烷	0.113371	0.0327738	0.0568747	0.0676731	0.0952792	0.106015	0.109422	0.103572	1.29849	0.213063	0.962514	1.53048	0.61398
56	16-Hydroxypalmitic acid	3.85	level1			271.227	24.8	NEG	C16H32O3	HMDB0006294	16 -羟基十六烷酸	506-13-8	C18218	Lipids and lipid-like molecules	脂质和类脂分子	Fatty Acyls	脂肪酰类	Fatty acids and conjugates	脂肪酸和聚合物	0.533878	0.719222	0.724942	0.659347	0.954827	0.459722	0.7022	0.705583	0.116485	0.781831	0.990715	1.07012	0.0977771
57	Erucamide	3.85	level1			338.341	16.6	POS	C22H43NO	HMDB0244507	芥酸酰胺	112-84-5		Lipids and lipid-like molecules	脂质和类脂分子	Fatty Acyls	脂肪酰类	Fatty amides	脂肪酸酰胺	56.5862	70.656	57.6882	61.6435	46.0202	29.3143	92.0722	55.8022	0.577483	0.777252	0.990176	0.905241	-0.143626
58	DEHP	3.85	level1			391.284	16.1	POS	C24H38O4	HMDB0249243	二乙基己基邻苯二甲酸	117-81-7	C03690	Benzenoids	苯环型化合物	Benzene and substituted derivatives	苯和取代衍生物	Benzoic acids and derivatives	苯甲酸及衍生物	0.122604	0.193399	0.203573	0.173192	0.197958	0.282833	0.295073	0.258622	1.6966	0.0981359	0.962514	1.49327	0.578473
59	2-Hydroxypalmitic acid	3.84	level1			271.227	24.8	NEG	C16H32O3	HMDB0031057	2 -羟基十六烷酸	764-67-0		Lipids and lipid-like molecules	脂质和类脂分子	Fatty Acyls	脂肪酰类	Fatty acids and conjugates	脂肪酸和聚合物	0.533878	0.719222	0.724942	0.659347	0.954827	0.459722	0.7022	0.705583	0.116485	0.781831	0.990715	1.07012	0.0977771
60	phenethanolamine	3.84	level1			120.081	155.5	POS	C8H11NO	HMDB0001065	2-氨基-1-苯乙醇	7568-93-6	C02735	Organic nitrogen compounds	有机含氮化合物	Organonitrogen compounds	有机氮化合物	Amines	胺	1.72904	2.19226	2.19789	2.03973	2.23472	2.13521	1.76513	2.04502	0.0214108	0.981202	0.999955	1.00259	0.00373711
61	Capric acid	3.84	level1			171.138	24.8	NEG	C10H20O2	HMDB0000511	癸酸	334-48-5	C01571	Lipids and lipid-like molecules	脂质和类脂分子	Fatty Acyls	脂肪酰类	Fatty acids and conjugates	脂肪酸和聚合物	0.860471	0.481915	1.30705	0.883146	1.24014	0.172713	0.69114	0.70133	0.771464	0.665071	0.97263	0.794127	-0.332559
62	9-Oxooctadecanoic acid	3.84	level1			297.242	24.5	NEG	C18H34O3	HMDB0030979	9 -氧代十八烷酸	4114-74-3		Lipids and lipid-like molecules	脂质和类脂分子	Fatty Acyls	脂肪酰类	Fatty acids and conjugates	脂肪酸和聚合物	0.565991	0.441817	6.34955e-06	0.335938	0.521313	6.39171e-06	0.597399	0.372906	0.0431392	0.89151	0.999955	1.11004	0.150618
63	Pentadecanoic acid	3.84	level1			241.216	23.1	NEG	C15H30O2	HMDB0000826	十五烷酸	1002-84-2	C16537	Lipids and lipid-like molecules	脂质和类脂分子	Fatty Acyls	脂肪酰类	Fatty acids and conjugates	脂肪酸和聚合物	0.147889	0.11437	0.18515	0.149136	0.176983	0.151641	0.105097	0.144574	0.291424	0.883961	0.999955	0.969406	-0.044827
64	2-Phenyllactic acid	3.83	level1			165.055	38.3	NEG	C9H10O3	HMDB0142137	苯基乳酸	515-30-0		Benzenoids	苯环型化合物	Benzene and substituted derivatives	苯和取代衍生物	Benzene and substituted derivatives	苯和取代衍生物	6.87516e-06	1.88544	0.310572	0.732005	0.290844	0.227703	3.04163	1.18673	1.02192	0.6995	0.978199	1.6212	0.697061
65	2-Methylbenzoxazole	3.83	level1			134.06	15.4	POS	C8H7NO	HMDB0032390	2-甲基苯并恶唑	95-21-6		Organoheterocyclic compounds	有机杂环化合物	Benzoxazoles	苯并恶唑	Benzoxazoles	苯并恶唑	0.0181509	0.13216	0.330783	0.160365	0.347605	2.49534e-05	0.293587	0.213739	0.638637	0.725072	0.982317	1.33283	0.414494
66	Uracil	3.83	level1			111.02	66.3	NEG	C4H4N2O2	HMDB0000300	尿嘧啶	66-22-8	C00106	Organoheterocyclic compounds	有机杂环化合物	Diazines	二氮杂苯	Pyrimidines and pyrimidine derivatives	嘧啶类和嘧啶类衍生物	0.0386203	0.0170183	0.0418628	0.0325005	0.0314595	0.0448873	0.0303477	0.0355648	0.483178	0.752979	0.985664	1.09429	0.129992
67	Citraconic acid	3.83	level1			129.019	65.7	NEG	C5H6O4	HMDB0000634	柠康酸	498-23-7	C02226	Lipids and lipid-like molecules	脂质和类脂分子	Fatty Acyls	脂肪酰类	Fatty acids and conjugates	脂肪酸和聚合物	0.118844	0.102862	0.0720413	0.0979158	0.105085	0.0899355	6.43614e-06	0.0650088	1.09772	0.40707	0.962514	0.663926	-0.590905
68	2-Hydroxyphenylacetic acid	3.83	level1			151.039	24.1	NEG	C8H8O3	HMDB0000669	2 -羟基苯乙酸	614-75-5	C05852	Benzenoids	苯环型化合物	Benzene and substituted derivatives	苯和取代衍生物	Phenylacetic acids	苯乙酸	0.173398	0.174046	0.0681933	0.138546	0.0630066	0.088705	0.145681	0.099131	0.762944	0.409485	0.962514	0.715511	-0.482955
69	Dodecanoic acid	3.83	level1			199.169	23.5	NEG	C12H24O2	HMDB0000638	月桂酸	143-07-7	C02679	Lipids and lipid-like molecules	脂质和类脂分子	Fatty Acyls	脂肪酰类	Fatty acids and conjugates	脂肪酸和聚合物	0.292578	0.135117	0.4169	0.281532	0.39677	0.167217	0.231218	0.265069	0.152999	0.884548	0.999955	0.941522	-0.0869326
70	Pelargonic acid	3.82	level1			157.123	25.2	NEG	C9H18O2	HMDB0000847	壬酸	112-05-0	C01601	Lipids and lipid-like molecules	脂质和类脂分子	Fatty Acyls	脂肪酰类	Fatty acids and conjugates	脂肪酸和聚合物	0.839903	0.377322	0.48631	0.567845	0.691887	0.719375	6.43614e-06	0.470423	1.04475	0.739808	0.984325	0.828435	-0.271539
71	Mono(2-ethylhexyl) phthalate	3.82	level1			277.144	24.5	NEG	C16H22O4	HMDB0013248	邻苯二甲酸单乙基己基酯	4376-20-9	C03343	Benzenoids	苯环型化合物	Benzene and substituted derivatives	苯和取代衍生物	Benzoic acids and derivatives	苯甲酸及衍生物	0.193703	6.18187e-06	0.203789	0.132499	0.183898	0.183809	0.170089	0.179266	0.929205	0.553971	0.962514	1.35296	0.436114
72	4-Cresol sulfate	3.82	level1			187.006	14.1	NEG	C7H8O4S	HMDB0011635	硫酸对甲酚	91978-69-7		Organic acids and derivatives	有机酸及其衍生物	Organic sulfuric acids and derivatives	有机硫酸及衍生物	Arylsulfates	芳基硫酸酯	1.60864	9.05148	0.736775	3.79897	0.55916	75.8767	29.4236	35.2865	1.07283	0.286945	0.962514	9.28845	3.21544
73	Cholesteryl sulfate	3.82	level1			465.302	13.8	NEG	C27H46O4S	HMDB0000653	胆固醇硫酸酯	1256-86-6	C18043	Lipids and lipid-like molecules	脂质和类脂分子	Steroids and steroid derivatives	甾类和甾类衍生物	Cholestane steroids	胆甾烷类固醇	4.53651	5.87984	4.12052	4.84562	4.38813	2.90384	2.63233	3.3081	1.68971	0.11355	0.962514	0.682699	-0.550679
74	alpha-Linolenic acid	3.81	level1			277.216	23	NEG	C18H30O2	HMDB0001388	亚麻酸	463-40-1	C06427	Lipids and lipid-like molecules	脂质和类脂分子	Fatty Acyls	脂肪酰类	Lineolic acids and derivatives	亚油酸及衍生物	0.555806	0.285895	6.34955e-06	0.280569	6.30815e-06	1.01312	0.386157	0.466427	0.13046	0.609617	0.964967	1.66243	0.733295
75	Lactate	3.81	level1			89.024	251.3	NEG	C3H6O3	HMDB0144295	乳酸	50-21-5	C01432	Organic acids and derivatives	有机酸及其衍生物	Hydroxy acids and derivatives	羟基酸及衍生物	Alpha hydroxy acids and derivatives	Alpha-羟基酸及衍生物	0.0010104	0.00169326	6.34955e-06	0.000903339	0.00159342	0.000902639	6.43614e-06	0.000834165	0.138527	0.922922	0.999955	0.923425	-0.114934
76	3-Methyl-1H-pyrazole-4-carbaldehyde	3.81	level1			111.055	48.9	POS	C5H6N2O		3 -甲基- 1H -吡唑- 4 -甲醛	112758-40-4		Organic oxygen compounds	有机含氧化合物	Organooxygen compounds	有机氧化合物	Carbonyl compounds	羰基化合物	13.1765	10.5261	11.5423	11.7483	14.6759	11.1039	15.6287	13.8028	1.13749	0.263052	0.962514	1.17488	0.232511
77	2,2,6,6-Tetramethyl-4-piperidinyl 2-methylacrylate	3.81	level1			226.18	44.4	POS	C13H23NO2		2，2，6，6 -四甲基- 4 -哌啶甲基丙烯酸酯	31582-45-3		Organoheterocyclic compounds	有机杂环化合物	Piperidines	哌啶	Piperidines	哌啶	2.38509e-05	0.3106	0.383463	0.231362	0.499669	0.517659	0.552429	0.523252	1.18151	0.128738	0.962514	2.26161	1.17735
78	cis-8,11,14-Eicosatrienoic acid	3.81	level1			305.247	18.8	NEG	C20H34O2	HMDB0002925	二高- γ -亚麻酸	135625-06-8	C03242	Lipids and lipid-like molecules	脂质和类脂分子	Fatty Acyls	脂肪酰类	Fatty acids and conjugates	脂肪酸和聚合物	0.471693	0.334752	0.576195	0.46088	0.521925	0.485305	0.702147	0.569792	1.14522	0.323663	0.962514	1.23631	0.306044
79	Chromocarb	3.8	level1			171.007	72.9	NEG	C10H6O4	HMDB0250209	色烯卡	4940-39-0	D07695	Organoheterocyclic compounds	有机杂环化合物	Benzopyrans	苯并吡喃	1-benzopyrans	1-苯并吡喃	0.411207	0.289471	0.208117	0.302932	0.267785	0.38149	0.304676	0.317983	0.343055	0.835313	0.99863	1.04969	0.0699591
80	Prostaglandin B2 (PGB2)	3.8	level1			333.204	66.4	NEG	C20H30O4	HMDB0004236	前列腺素B2	13367-85-6	C05954	Lipids and lipid-like molecules	脂质和类脂分子	Fatty Acyls	脂肪酰类	Eicosanoids	类花生酸	0.0250614	6.18187e-06	0.0101748	0.0117475	0.0114324	0.00747478	0.038499	0.0191354	0.921836	0.576417	0.962912	1.6289	0.703894
81	2-Ketocaproic acid	3.8	level1			129.055	25.9	NEG	C6H10O3	HMDB0001864	2 -氧代己酸	2492-75-3	C00902	Organic acids and derivatives	有机酸及其衍生物	Keto acids and derivatives	酮酸及衍生物	Medium-chain keto acids and derivatives	中链酮酸及衍生物	6.67271	9.11138	11.9408	9.24164	11.2212	10.1147	7.40481	9.58022	0.245982	0.867084	0.999955	1.03664	0.0519098
82	Ketoleucine	3.8	level1			129.055	25.9	NEG	C6H10O3	HMDB0000695	4 -甲基- 2 -氧代戊酸	816-66-0	C00233	Organic acids and derivatives	有机酸及其衍生物	Keto acids and derivatives	酮酸及衍生物	Short-chain keto acids and derivatives	短链酮酸及衍生物	6.67271	9.11138	11.9408	9.24164	11.2212	10.1147	7.40481	9.58022	0.245982	0.867084	0.999955	1.03664	0.0519098
83	Arachidonic acid (AA)	3.8	level1			303.232	18.8	NEG	C20H32O2	HMDB0001043	花生四烯酸	506-32-1	C00219	Lipids and lipid-like molecules	脂质和类脂分子	Fatty Acyls	脂肪酰类	Fatty acids and conjugates	脂肪酸和聚合物	3.04762	3.08887	1.63536	2.59062	1.37493	2.53496	3.71181	2.54057	0.0832322	0.954624	0.999955	0.98068	-0.0281461
84	Heptadecanoic acid	3.8	level1			269.248	18.5	NEG	C17H34O2	HMDB0002259	十七烷酸	506-12-7		Lipids and lipid-like molecules	脂质和类脂分子	Fatty Acyls	脂肪酰类	Fatty acids and conjugates	脂肪酸和聚合物	0.306008	0.219273	6.34955e-06	0.175096	6.30815e-06	0.345539	0.272411	0.205985	0.0941632	0.835118	0.99863	1.17641	0.234395
85	cis-11-Eicosenoic acid	3.8	level1			309.279	17.7	NEG	C20H38O2	HMDB0002231	二十碳-11-烯酸	26764-41-0	C16526	Lipids and lipid-like molecules	脂质和类脂分子	Fatty Acyls	脂肪酰类	Fatty acids and conjugates	脂肪酸和聚合物	0.243224	0.191873	6.34955e-06	0.145034	6.30815e-06	0.228284	0.182052	0.136781	0.0594239	0.939187	0.999955	0.943092	-0.0845289
86	Indoxyl sulfate	3.8	level1			212.001	15.8	NEG	C8H7NO4S	HMDB0000682	硫酸吲哚酚	487-94-5		Organic acids and derivatives	有机酸及其衍生物	Organic sulfuric acids and derivatives	有机硫酸及衍生物	Arylsulfates	芳基硫酸酯	0.648666	6.08209	11.0032	5.91133	10.5559	6.39171e-06	10.0111	6.85564	0.811389	0.845778	0.999293	1.15975	0.213808
87	2,6-Dihydroxybenzoic acid	3.8	level1			153.019	14.2	NEG	C7H6O4	HMDB0013676	2,6-二羟基苯甲酸	303-07-1	C21298	Benzenoids	苯环型化合物	Benzene and substituted derivatives	苯和取代衍生物	Benzoic acids and derivatives	苯甲酸及衍生物	0.130289	0.201485	0.151551	0.161108	0.1372	0.0506864	0.101655	0.0965136	1.5192	0.120224	0.962514	0.599061	-0.739226
88	Phenylsulfate	3.8	level1			172.991	14.1	NEG	C6H6O4S	HMDB0060015	硫酸苯酯	937-34-8	C02180	Organic acids and derivatives	有机酸及其衍生物	Organic sulfuric acids and derivatives	有机硫酸及衍生物	Arylsulfates	芳基硫酸酯	0.565256	4.99083	0.740995	2.09903	0.69005	5.9479	4.24288	3.62694	0.902028	0.510841	0.962514	1.72792	0.789033
89	Tetradecyl sulfate (sodium)	3.8	level1			293.178	13.5	NEG	C14H30O4S	HMDB0014607	硫酸十四烷基酯	1191-50-0		Organic acids and derivatives	有机酸及其衍生物	Organic sulfuric acids and derivatives	有机硫酸及衍生物	Sulfuric acid esters	硫酸酯	0.5098	0.407751	0.435774	0.451108	0.402069	0.403068	0.44005	0.415062	1.10585	0.334858	0.962514	0.920095	-0.120146
90	cis-​9,​10-​Epoxystearic acid	3.79	level1			297.242	24.5	NEG	C18H34O3	HMDB0247617	9，10 -环氧硬脂酸	24560-98-3	C19418	Lipids and lipid-like molecules	脂质和类脂分子	Fatty Acyls	脂肪酰类	Lineolic acids and derivatives	亚油酸及衍生物	0.565991	0.441817	6.34955e-06	0.335938	0.521313	6.39171e-06	0.597399	0.372906	0.0431392	0.89151	0.999955	1.11004	0.150618
91	5Z,8Z,11Z-Eicosatrienoic acid	3.79	level1			305.247	18.8	NEG	C20H34O2	HMDB0010378	二十碳三烯酸	20590-32-3	C21938	Lipids and lipid-like molecules	脂质和类脂分子	Fatty Acyls	脂肪酰类	Fatty acids and conjugates	脂肪酸和聚合物	0.471693	0.334752	0.576195	0.46088	0.521925	0.485305	0.702147	0.569792	1.14522	0.323663	0.962514	1.23631	0.306044
92	3-Methyl-2-oxovaleric acid	3.79	level1			129.055	25.9	NEG	C6H10O3	HMDB0000491	3 -甲基- 2 -氧代戊酸	1460-34-0	C03465	Organic acids and derivatives	有机酸及其衍生物	Keto acids and derivatives	酮酸及衍生物	Short-chain keto acids and derivatives	短链酮酸及衍生物	6.67271	9.11138	11.9408	9.24164	11.2212	10.1147	7.40481	9.58022	0.245982	0.867084	0.999955	1.03664	0.0519098
93	cis-11.14-Eicosadienoic acid	3.79	level1			307.263	18.9	NEG	C20H36O2	HMDB0005060	二十碳二烯酸	2091-39-6	C16525	Lipids and lipid-like molecules	脂质和类脂分子	Fatty Acyls	脂肪酰类	Fatty acids and conjugates	脂肪酸和聚合物	0.234172	0.158097	0.471871	0.288046	0.428702	0.328043	0.236824	0.331189	0.579126	0.713799	0.981285	1.14978	0.201356
94	Myristic acid	3.79	level1			227.201	18.1	NEG	C14H28O2	HMDB0000806	肉豆蔻酸	544-63-8	C06424	Lipids and lipid-like molecules	脂质和类脂分子	Fatty Acyls	脂肪酰类	Fatty acids and conjugates	脂肪酸和聚合物	2.40227	0.589387	1.56863	1.5201	1.57056	0.326376	0.614136	0.837024	1.15917	0.34923	0.962514	0.550639	-0.860822
95	Phytanic acid	3.79	level1			311.294	16.9	NEG	C20H40O2	HMDB0000801	植烷酸	14721-66-5	C01607	Lipids and lipid-like molecules	脂质和类脂分子	Prenol lipids	异戊烯醇脂类	Diterpenoids	二萜类	1.55634	1.01325	2.06006	1.54322	2.16557	0.170227	0.463896	0.933231	1.29971	0.427552	0.962514	0.604731	-0.725634
96	Propyl paraben	3.79	level1			179.071	16.3	NEG	C10H12O3	HMDB0032574	尼泊金丙酯	94-13-3	D01422	Benzenoids	苯环型化合物	Benzene and substituted derivatives	苯和取代衍生物	Benzoic acids and derivatives	苯甲酸及衍生物	0.155404	0.0283351	0.13367	0.105803	0.159379	0.112688	0.1686	0.146889	0.928309	0.392297	0.962514	1.38833	0.473348
97	Dimethylglycine	3.78	level1			104.072	309.2	POS	C4H9NO2	HMDB0000092	N，N -二甲基甘氨酸	1118-68-9	C01026	Organic acids and derivatives	有机酸及其衍生物	Carboxylic acids and derivatives	羧酸及衍生物	Amino acids, peptides, and analogues	氨基酸、肽和类似物	0.669536	0.604977	0.683407	0.65264	2.38091e-05	2.49534e-05	0.687012	0.22902	1.49038	0.20442	0.962514	0.350914	-1.51081
98	Oleoylcarnitine (Car(18:1))	3.78	level2			426.358	82.5	POS	C25H47NO4	HMDB0094687	十八碳烯酰肉碱	13962-05-5		Lipids and lipid-like molecules	脂质和类脂分子	Fatty Acyls	脂肪酰类	Fatty acid esters	脂肪酸酯	9.6377	8.47714	10.9063	9.67371	13.3139	14.89	15.5287	14.5776	2.08976	0.00699144	0.962514	1.50692	0.591608
99	Sulfaphenazole	3.78	level1			313.077	16.1	NEG	C15H14N4O2S	HMDB0015667	磺胺苯吡唑	526-08-9	D01954	Organoheterocyclic compounds	有机杂环化合物	Azoles	吡咯类	Pyrazoles	吡唑	0.516688	0.460873	0.393278	0.456946	0.291165	0.403934	0.423812	0.37297	1.25975	0.198733	0.962514	0.816223	-0.292964
100	Pyrrolidine	3.77	level1			72.0798	298.1	POS	C4H9N	HMDB0031641	吡咯烷	123-75-1		Organoheterocyclic compounds	有机杂环化合物	Pyrrolidines	吡咯烷	Pyrrolidines	吡咯烷	0.00510472	0.41843	0.371503	0.265012	0.000852374	0.407559	0.00565817	0.138023	0.767642	0.535818	0.962514	0.520818	-0.941148
101	2-Methyl-3-hydroxybutyric acid	3.77	level1			101.06	224.3	POS	C5H10O3	HMDB0000354	2 -甲基- 3 -羟基丁酸	473-86-9		Lipids and lipid-like molecules	脂质和类脂分子	Fatty Acyls	脂肪酰类	Fatty acids and conjugates	脂肪酸和聚合物	0.233182	2.21526e-05	0.162804	0.132003	0.153134	0.128494	0.154463	0.145364	0.869093	0.86496	0.999955	1.10122	0.139099
102	Daltogen	3.77	level1			132.102	157.8	POS	C6H15NO3	HMDB0032538	三乙醇胺	102-71-6	C06771	Organic nitrogen compounds	有机含氮化合物	Organonitrogen compounds	有机氮化合物	Amines	胺	11.9132	2.21526e-05	11.1648	7.69266	11.4269	11.8405	13.0599	12.1091	0.963406	0.370173	0.962514	1.57411	0.654537
103	Monomethyl fumarate	3.77	level1			129.019	102.8	NEG	C5H6O4		富马酸单甲酯	2756-87-8	D11492	Lipids and lipid-like molecules	脂质和类脂分子	Fatty Acyls	脂肪酰类	Fatty acid esters	脂肪酸酯	0.646611	0.538715	0.67991	0.621745	0.687961	0.670551	0.364035	0.574182	0.678733	0.696692	0.977574	0.923501	-0.114815
104	Piperonylic acid	3.77	level1			165.019	102.8	NEG	C8H6O4	HMDB0032613	胡椒基酸	94-53-1		Organoheterocyclic compounds	有机杂环化合物	Benzodioxoles	苯并二恶茂烷类	Benzodioxoles	苯并二恶茂烷类	0.0980388	0.0766951	0.0546162	0.0764501	0.0477854	0.0632834	0.110646	0.0739048	0.181041	0.916073	0.999955	0.966707	-0.0488488
105	Chenodeoxycholic acid	3.77	level1			391.284	53.6	NEG	C24H40O4	HMDB0000518	鹅去氧胆酸	474-25-9	C02528	Lipids and lipid-like molecules	脂质和类脂分子	Steroids and steroid derivatives	甾类和甾类衍生物	Bile acids, alcohols and derivatives	胆汁酸类、醇类及其衍生物	0.162357	0.135513	0.131869	0.143246	0.118078	0.135518	0.0550059	0.102867	1.36206	0.19917	0.962514	0.718114	-0.477715
106	12-Hydroxystearic acid	3.77	level1			281.247	39.4	NEG	C18H36O3	HMDB0061706	12－羟基硬脂酸	106-14-9		Lipids and lipid-like molecules	脂质和类脂分子	Fatty Acyls	脂肪酰类	Fatty acids and conjugates	脂肪酸和聚合物	0.932447	0.919403	2.52918	1.46034	2.35225	1.6036	1.09413	1.68333	0.533566	0.747865	0.985141	1.15269	0.205008
107	Hexaethylene glycol	3.77	level1			283.175	28.7	POS	C12H26O7	HMDB0061822	六甘醇	2615-15-8		Organic oxygen compounds	有机含氧化合物	Organooxygen compounds	有机氧化合物	Ethers	醚	42.6899	39.0031	43.152	41.615	46.0147	43.6993	2.34116e-05	29.9047	1.08621	0.516254	0.962514	0.718604	-0.476732
108	2-Hydroxystearic acid	3.77	level1			299.258	24.8	NEG	C18H36O3	HMDB0062549	2 -羟基十八烷酸	26531-80-6	C03045	Lipids and lipid-like molecules	脂质和类脂分子	Fatty Acyls	脂肪酰类	Fatty acids and conjugates	脂肪酸和聚合物	0.467143	0.380285	0.524969	0.457465	0.439399	0.329513	0.313322	0.360745	1.53834	0.169345	0.962514	0.788572	-0.342685
109	Dodecyl gallate	3.77	level1			337.204	14.1	NEG	C19H30O5	HMDB0038720	没食子酸十二酯	1166-52-5		Benzenoids	苯环型化合物	Benzene and substituted derivatives	苯和取代衍生物	Benzoic acids and derivatives	苯甲酸及衍生物	0.247627	0.201945	0.160298	0.20329	0.196606	0.134956	0.0968298	0.142797	1.517	0.19107	0.962514	0.702432	-0.50957
110	12(S)-HHTrE	3.76	level1			279.196	25.9	NEG	C17H28O3	HMDB0012535	12-羟十七碳三烯酸	54397-84-1	C20388	Lipids and lipid-like molecules	脂质和类脂分子	Fatty Acyls	脂肪酰类	Fatty acids and conjugates	脂肪酸和聚合物	0.712113	0.710604	0.0157552	0.479491	0.0156033	0.268781	0.933224	0.405869	0.0785014	0.847382	0.999293	0.84646	-0.240487
111	13(S)-HODE	3.76	level1			295.227	24.5	NEG	C18H32O3	HMDB0004667	( 9Z , 11E , 13S) - 13 -羟基十八碳- 9，11 -二烯酸	29623-28-7	C14762	Lipids and lipid-like molecules	脂质和类脂分子	Fatty Acyls	脂肪酰类	Lineolic acids and derivatives	亚油酸及衍生物	0.35586	0.259941	6.34955e-06	0.205269	0.276901	0.199936	0.262564	0.246467	0.90004	0.724411	0.982317	1.2007	0.263879
112	Pehanorm	3.75	level1			122.081	275.4	POS	C4H11NO3	HMDB0240288	氨基丁三醇	77-86-1	C07182	Organic nitrogen compounds	有机含氮化合物	Organonitrogen compounds	有机氮化合物	Amines	胺	0.486268	0.498835	0.55445	0.513184	0.53993	0.579907	0.45585	0.525229	0.231325	0.789182	0.992348	1.02347	0.0334697
113	alpha-Ketoisovaleric acid	3.75	level1			115.04	30.4	NEG	C5H8O3	HMDB0000019	3-甲基-2-氧代丁酸	759-05-7	C00141	Organic acids and derivatives	有机酸及其衍生物	Keto acids and derivatives	酮酸及衍生物	Short-chain keto acids and derivatives	短链酮酸及衍生物	2.27164	2.65276	3.17207	2.69882	3.0467	2.27703	2.15934	2.49436	0.662177	0.620381	0.965901	0.924239	-0.113662
114	4-Methylquinolin-2-ol	3.75	level1			158.06	23.3	NEG	C10H9NO		4 -甲基喹啉- 2 - 醇	607-66-9		Organoheterocyclic compounds	有机杂环化合物	Quinolines and derivatives	喹啉及衍生物	Quinolones and derivatives	喹诺酮及衍生物	0.128508	6.18187e-06	0.11147	0.079995	0.118572	0.121851	0.100907	0.113777	0.938035	0.454398	0.962514	1.4223	0.508222
115	Docosahexaenoic acid (DHA)	3.75	level1			327.231	18.7	NEG	C22H32O2	HMDB0002183		6217-54-5	C06429	Lipids and lipid-like molecules	脂质和类脂分子	Fatty Acyls	脂肪酰类	Fatty acids and conjugates	脂肪酸和聚合物	0.373536	0.0788972	0.373269	0.275234	0.471573	0.364389	0.171304	0.335755	0.481276	0.669804	0.973668	1.21989	0.286753
116	Nicotinamide	3.75	level1			123.055	8	POS	C6H6N2O	HMDB0001406	烟酰胺	98-92-0	C00153	Organoheterocyclic compounds	有机杂环化合物	Pyridines and derivatives	吡啶及衍生物	Pyridinecarboxylic acids and derivatives	吡啶羧酸及衍生物	0.0670062	0.0760257	0.0666351	0.069889	0.0605566	0.07617	0.0625409	0.0664225	0.6212	0.581534	0.962912	0.9504	-0.0733939
117	N-Acetylalanine	3.75	level1			132.065	203.6	POS	C5H9NO3	HMDB0255053	N-乙酰-DL-丙氨酸	139146-66-0		Organic acids and derivatives	有机酸及其衍生物	Carboxylic acids and derivatives	羧酸及衍生物	Amino acids, peptides, and analogues	氨基酸、肽和类似物	6.35888	8.64891	2.18147	5.72975	2.14206	0.52755	2.16425	1.61129	1.63378	0.104677	0.962514	0.281215	-1.83026
118	Pipecolic acid	3.74	level1			130.086	293.7	POS	C6H11NO2	HMDB0000716	L-哌啶甲酸	3105-95-1	C00408	Organic acids and derivatives	有机酸及其衍生物	Carboxylic acids and derivatives	羧酸及衍生物	Amino acids, peptides, and analogues	氨基酸、肽和类似物	0.590714	0.881675	0.914982	0.79579	0.883278	1.01002	0.651709	0.848335	0.400083	0.738828	0.984009	1.06603	0.0922461
119	Scopine	3.74	level1			156.102	214.2	POS	C8H13NO2		东莨菪醇	498-45-3		Organoheterocyclic compounds	有机杂环化合物	Oxazinanes	恶嗪烷	Morpholines	吗啉	0.0731687	2.21526e-05	0.0602884	0.0444931	0.0593701	2.49534e-05	0.0586077	0.0393342	0.0724223	0.871435	0.999955	0.884053	-0.177795
120	2-Aminopurine	3.74	level1			136.062	167.7	POS	C5H5N5	HMDB0245025	2-氨基嘌呤	452-06-2		Organoheterocyclic compounds	有机杂环化合物	Imidazopyrimidines	咪唑并嘧啶	Purines and purine derivatives	嘌呤和嘌呤衍生物	0.221696	0.202611	0.055109	0.159805	0.0629263	0.193982	0.328809	0.195239	0.346147	0.722769	0.982115	1.22173	0.288925
121	1-Methyladenosine	3.74	level1			282.12	166.8	POS	C11H15N5O4	HMDB0003331	1-甲基腺苷	15763-06-1	C02494	Nucleosides, nucleotides, and analogues	核苷、核苷酸和类似物	Purine nucleosides	嘌呤核苷类	Purine nucleosides	嘌呤核苷类	2.38509e-05	0.512529	0.553286	0.35528	0.584889	2.49534e-05	0.513263	0.366059	0.049915	0.96845	0.999955	1.03034	0.0431216
122	PC(10:0/10:0)	3.74	level1			548.371	113.8	POS	C28H56NO8P	HMDB0244070	1, 2 -二癸酰基- sn -甘油-3 -磷酸胆碱	3436-44-0		Lipids and lipid-like molecules	脂质和类脂分子	Glycerophospholipids	甘油磷脂类	Glycerophosphocholines	甘油磷酸胆碱	5.08129	7.16063	9.02678	7.08957	9.99904	4.20161	6.55815	6.9196	0.253603	0.93738	0.999955	0.976026	-0.035009
123	Taurochenodeoxycholic acid	3.74	level1			500.304	48.5	POS	C26H45NO6S	HMDB0000951	牛磺鹅去氧胆酸	516-35-8	C05465	Lipids and lipid-like molecules	脂质和类脂分子	Steroids and steroid derivatives	甾类和甾类衍生物	Bile acids, alcohols and derivatives	胆汁酸类、醇类及其衍生物	0.333808	0.345914	0.381626	0.353783	0.274764	0.232391	1.36209	0.623081	0.54411	0.542178	0.962514	1.7612	0.816558
124	Sphingosine	3.74	level1			282.279	28.3	POS	C18H37NO2	HMDB0000252	鞘氨醇	123-78-4	C00319	Organic nitrogen compounds	有机含氮化合物	Organonitrogen compounds	有机氮化合物	Amines	胺	0.572747	0.354666	0.423809	0.450407	0.442687	0.523564	0.366052	0.444101	0.13286	0.940049	0.999955	0.985998	-0.0203435
125	Hydrastinine	3.74	level1			190.086	13.8	POS	C11H13NO3		北美黄连次碱	6592-85-4		Organoheterocyclic compounds	有机杂环化合物	Tetrahydroisoquinolines	四氢异喹啉	Tetrahydroisoquinolines	四氢异喹啉	0.0317986	0.0618371	0.0309331	0.041523	0.0273097	0.0147417	0.0444882	0.0288465	0.980789	0.395311	0.962514	0.694712	-0.525512
126	Proline	3.74	level1			114.056	292.8	NEG	C5H9NO2	HMDB0000162	脯氨酸	147-85-3	C00148	Organic acids and derivatives	有机酸及其衍生物	Carboxylic acids and derivatives	羧酸及衍生物	Amino acids, peptides, and analogues	氨基酸、肽和类似物	0.0365796	0.0398675	0.0325006	0.0363159	0.0341107	0.0285142	0.0394966	0.0340405	0.644449	0.583469	0.962912	0.937344	-0.0933501
127	12-Methyltridecanoic acid	3.73	level1			227.201	18.1	NEG	C14H28O2	HMDB0031072	12 -甲基十三烷酸	2724-57-4		Lipids and lipid-like molecules	脂质和类脂分子	Fatty Acyls	脂肪酰类	Fatty acids and conjugates	脂肪酸和聚合物	2.40227	0.589387	1.56863	1.5201	1.57056	0.326376	0.614136	0.837024	1.15917	0.34923	0.962514	0.550639	-0.860822
128	N6-Methyladenosine	3.73	level1			282.12	166.8	POS	C11H15N5O4	HMDB0004044	N6-甲基腺苷	1867-73-8		Nucleosides, nucleotides, and analogues	核苷、核苷酸和类似物	Purine nucleosides	嘌呤核苷类	Purine nucleosides	嘌呤核苷类	2.38509e-05	0.512529	0.553286	0.35528	0.584889	2.49534e-05	0.513263	0.366059	0.049915	0.96845	0.999955	1.03034	0.0431216
129	H-Val-Ala-OH	3.73	level1			189.123	226.1	POS	C8H16N2O3	HMDB0029120	缬氨酸酰丙氨酸	27493-61-4		Organic acids and derivatives	有机酸及其衍生物	Carboxylic acids and derivatives	羧酸及衍生物	Amino acids, peptides, and analogues	氨基酸、肽和类似物	0.0761928	0.048145	0.0268279	0.0503886	0.0268043	0.0121807	0.0623775	0.0337875	0.949052	0.466538	0.962514	0.670539	-0.576606
130	4-Aminobenzoic acid	3.73	level1			138.055	169.2	POS	C7H7NO2	HMDB0001392	4-氨基苯甲酸	150-13-0	C00568	Benzenoids	苯环型化合物	Benzene and substituted derivatives	苯和取代衍生物	Benzoic acids and derivatives	苯甲酸及衍生物	13.8668	2.21526e-05	14.2486	9.37181	13.927	2.49534e-05	12.5211	8.81607	0.0601297	0.93545	0.999955	0.940701	-0.0881921
131	5-Hydroxyindole-3-acetic acid	3.73	level1			192.065	158.1	POS	C10H9NO3	HMDB0000763	5-羟吲哚乙酸	54-16-0	C05635	Organoheterocyclic compounds	有机杂环化合物	Indoles and derivatives	吲哚和衍生物	Indolyl carboxylic acids and derivatives	吲哚基羧酸及衍生物	0.117356	2.21526e-05	0.146823	0.0880673	0.147818	0.173523	0.107231	0.142857	0.969472	0.324493	0.962514	1.62214	0.697896
132	5-Methoxyindole-3-acetic acid	3.73	level1			188.07	157.6	POS	C11H11NO3	HMDB0004096	5 -甲氧基吲哚- 3 -乙酸	3471-31-6	C05660	Organoheterocyclic compounds	有机杂环化合物	Indoles and derivatives	吲哚和衍生物	Indolyl carboxylic acids and derivatives	吲哚基羧酸及衍生物	3.04347	2.21526e-05	3.46335	2.16895	3.91957	3.31759	3.77401	3.67039	0.978078	0.246211	0.962514	1.69225	0.758939
133	LPC(18:0/0:0)	3.73	level1			524.371	144.3	POS	C26H54NO7P	HMDB0010384	1-硬脂酰-sn-甘油-3-磷酰胆碱	19420-57-6		Lipids and lipid-like molecules	脂质和类脂分子	Glycerophospholipids	甘油磷脂类	Glycerophosphocholines	甘油磷酸胆碱	0.17987	0.247482	0.158934	0.195429	0.186997	0.242445	2.34116e-05	0.143155	1.06682	0.539696	0.962514	0.732518	-0.449064
134	1-Methylguanine	3.73	level1			166.072	90.6	POS	C6H7N5O	HMDB0003282	1-甲基鸟嘌呤	938-85-2	C04152	Organoheterocyclic compounds	有机杂环化合物	Imidazopyrimidines	咪唑并嘧啶	Purines and purine derivatives	嘌呤和嘌呤衍生物	0.515717	0.507373	0.676522	0.566537	0.69152	0.76673	0.468761	0.642337	0.630177	0.510455	0.962514	1.13379	0.181159
135	N-Acetylhistamine	3.73	level1			154.097	52.3	POS	C7H11N3O	HMDB0013253	N-乙酰组胺	673-49-4	C05135	Organic acids and derivatives	有机酸及其衍生物	Carboxylic acids and derivatives	羧酸及衍生物	Carboxylic acid derivatives	羧酸衍生物	0.194817	0.185986	0.466845	0.282549	0.483142	0.279888	0.394997	0.386009	1.09494	0.39771	0.962514	1.36617	0.450133
136	3-Hydroxy-2-methylpyridine	3.73	level1			110.06	15.7	POS	C6H7NO		3-羟基-2-甲基吡啶	1121-25-1		Organoheterocyclic compounds	有机杂环化合物	Pyridines and derivatives	吡啶及衍生物	Methylpyridines	甲基吡啶	0.246208	0.220539	0.0523993	0.173049	0.0411789	0.0538512	0.194426	0.0964854	0.877258	0.382637	0.962514	0.557562	-0.842797
137	3-Pyridinemethanol	3.73	level1			110.06	15.7	POS	C6H7NO	HMDB0245980	3-吡啶甲醇	100-55-0	D05158	Organoheterocyclic compounds	有机杂环化合物	Pyridines and derivatives	吡啶及衍生物	Pyridines and derivatives	吡啶及衍生物	0.246208	0.220539	0.0523993	0.173049	0.0411789	0.0538512	0.194426	0.0964854	0.877258	0.382637	0.962514	0.557562	-0.842797
138	2-Hydroxybutyric acid	3.73	level1			85.0291	172.5	NEG	C4H8O3	HMDB0000008	(S)-2-羟基丁酸	3347-90-8	C05984	Organic acids and derivatives	有机酸及其衍生物	Hydroxy acids and derivatives	羟基酸及衍生物	Alpha hydroxy acids and derivatives	Alpha-羟基酸及衍生物	0.0339881	0.0658051	0.0334384	0.0444106	0.0604385	0.0703219	0.084187	0.0716491	1.70151	0.0990048	0.962514	1.61334	0.690047
139	2-Pyrimidinemethanamine	3.72	level1			110.071	232.1	POS	C5H7N3		2 -嘧啶甲胺	75985-45-4		Organic nitrogen compounds	有机含氮化合物	Organonitrogen compounds	有机氮化合物	Amines	胺	1.13715	0.67299	1.13058	0.980242	1.33057	2.49534e-05	1.06367	0.798088	0.982458	0.696568	0.977525	0.814175	-0.29659
140	Choline	3.72	level1			104.107	225.1	POS	C5H14NO	HMDB0000097	胆碱	62-49-7	C00114	Organic nitrogen compounds	有机含氮化合物	Organonitrogen compounds	有机氮化合物	Quaternary ammonium salts	季铵盐	2.38509e-05	0.198293	0.196699	0.131672	0.192485	2.49534e-05	0.210207	0.134239	0.0511987	0.979555	0.999955	1.01949	0.0278517
141	Palmitoyl sphingomyelin	3.72	level1			703.574	144.1	POS	C39H79N2O6P	HMDB0061712	N -棕榈酰鞘磷脂	6254-89-3		Lipids and lipid-like molecules	脂质和类脂分子	Sphingolipids	鞘脂类	Phosphosphingolipids	鞘磷脂	0.0683693	2.21526e-05	0.0621093	0.0435003	0.0581851	2.49534e-05	0.0706751	0.0429617	0.0488526	0.986894	0.999955	0.98762	-0.0179727
142	Creatinine	3.72	level1			114.066	124.2	POS	C4H7N3O	HMDB0000562	肌酸酐	60-27-5	C00791	Organic acids and derivatives	有机酸及其衍生物	Carboxylic acids and derivatives	羧酸及衍生物	Amino acids, peptides, and analogues	氨基酸、肽和类似物	0.859551	0.595955	2.35453e-05	0.485177	0.783693	0.797734	0.792392	0.791273	0.975064	0.351745	0.962514	1.6309	0.705665
143	Hypoxanthine	3.72	level1			137.046	101.7	POS	C5H4N4O	HMDB0000157		68-94-0	C00262	Organoheterocyclic compounds	有机杂环化合物	Imidazopyrimidines	咪唑并嘧啶	Purines and purine derivatives	嘌呤和嘌呤衍生物	1.5294	1.44939	0.998738	1.32584	1.26239	1.76325	1.27841	1.43468	0.505911	0.66474	0.972454	1.08209	0.11382
144	Ataluren	3.72	level1			283.05	72	NEG	C15H9FN2O3	HMDB0248691	阿塔鲁伦	775304-57-9	D09323	Organoheterocyclic compounds	有机杂环化合物	Azoles	吡咯类	Oxadiazoles	恶二唑	0.188052	0.213753	0.242618	0.214807	0.239379	0.179009	0.185071	0.201153	0.683671	0.611709	0.964967	0.936434	-0.0947502
145	2-O-Methylcytosine	3.71	level1			126.066	103.1	POS	C5H7N3O	HMDB0004339	4 -氨基- 2 -甲氧基嘧啶	3289-47-2		Organoheterocyclic compounds	有机杂环化合物	Diazines	二氮杂苯	Pyrimidines and pyrimidine derivatives	嘧啶类和嘧啶类衍生物	2.82607	3.1924	1.3622	2.46022	1.39959	1.26145	1.48795	1.383	1.56013	0.192361	0.962514	0.562144	-0.830989
146	Anastrozole	3.71	level1			292.158	23.6	NEG	C17H19N5	HMDB0015348	阿那曲唑	120511-73-1	C08159	Benzenoids	苯环型化合物	Benzene and substituted derivatives	苯和取代衍生物	Phenylpropanes	苯丙烷	0.100199	0.0974601	0.0991667	0.098942	0.105779	6.39171e-06	0.12496	0.0769154	0.989928	0.62792	0.967229	0.777379	-0.36331
147	4-Ethoxybenzoic acid	3.7	level1			165.055	62.1	NEG	C9H10O3		4-乙氧基苯甲酸	619-86-3		Benzenoids	苯环型化合物	Benzene and substituted derivatives	苯和取代衍生物	Benzoic acids and derivatives	苯甲酸及衍生物	0.0599663	6.18187e-06	0.0250888	0.0283538	0.0182812	0.0672157	6.43614e-06	0.0285011	0.122794	0.995838	0.999955	1.0052	0.00747638
148	Prostaglandin A2	3.7	level1			333.204	66.4	NEG	C20H30O4	HMDB0002752	前列腺素A2	13345-50-1	C05953	Lipids and lipid-like molecules	脂质和类脂分子	Fatty Acyls	脂肪酰类	Eicosanoids	类花生酸	0.0250614	6.18187e-06	0.0101748	0.0117475	0.0114324	0.00747478	0.038499	0.0191354	0.921836	0.576417	0.962912	1.6289	0.703894
149	Phthalic acid	3.7	level1			165.019	299.5	NEG	C8H6O4	HMDB0002107	邻苯二甲酸	88-99-3	C01606	Benzenoids	苯环型化合物	Benzene and substituted derivatives	苯和取代衍生物	Benzoic acids and derivatives	苯甲酸及衍生物	0.175976	0.139926	0.143184	0.153029	0.146963	0.154326	0.150469	0.150586	0.236828	0.844913	0.999293	0.984038	-0.0232144
150	3-Methylthiopropionic acid	3.7	level1			119.016	182.3	NEG	C4H8O2S	HMDB0001527	3 - (甲硫基)丙酸	646-01-5	C08276	Lipids and lipid-like molecules	脂质和类脂分子	Fatty Acyls	脂肪酰类	Fatty acids and conjugates	脂肪酸和聚合物	0.0130365	0.0115673	0.0114021	0.012002	0.0116042	0.0118738	0.0119476	0.0118085	0.428964	0.733499	0.983503	0.983881	-0.0234446
151	2'-O-methylcytidine	3.7	level1			256.093	143.8	NEG	C10H15N3O5	HMDB0242132	2 ' - O -甲基胞苷	2140-72-9		Nucleosides, nucleotides, and analogues	核苷、核苷酸和类似物	Pyrimidine nucleosides	嘧啶核苷类	Pyrimidine nucleosides	嘧啶核苷类	0.529142	0.446336	0.562815	0.512764	0.553023	0.428262	0.499391	0.493558	0.502364	0.720612	0.981898	0.962545	-0.0550747
152	PC(16:0/20:4)	3.7	level1			782.567	104.7	POS	C44H80NO8P	HMDB0007982	1-棕榈酰基-2-花生四烯酰-sn-甘油-3-磷酸胆碱	35418-58-7		Lipids and lipid-like molecules	脂质和类脂分子	Glycerophospholipids	甘油磷脂类	Glycerophosphocholines	甘油磷酸胆碱	0.64674	2.21526e-05	0.418645	0.355136	0.490348	0.361393	0.481798	0.444513	0.908504	0.668779	0.973531	1.25167	0.323854
153	Benperidol	3.7	level1			380.173	60.1	NEG	C22H24FN3O2	HMDB0248959	苯哌利多	2062-84-2	D02627	Organic oxygen compounds	有机含氧化合物	Organooxygen compounds	有机氧化合物	Carbonyl compounds	羰基化合物	0.479024	0.410784	0.295216	0.395008	0.481029	0.124228	0.558823	0.388027	0.445818	0.963694	0.999955	0.982326	-0.0257266
154	4-Hydroxymethylpyrazole	3.69	level1			99.0551	59.6	POS	C4H6N2O	HMDB0060768	1H -吡唑- 4 -甲醇	25222-43-9		Organoheterocyclic compounds	有机杂环化合物	Azoles	吡咯类	Pyrazoles	吡唑	1.19214	0.81495	0.448562	0.81855	0.855943	0.443781	0.921165	0.740296	0.293467	0.779702	0.990522	0.904399	-0.144968
155	11-Dehydrocorticosterone	3.69	level1			325.183	15.1	NEG	C21H28O4	HMDB0004029	11-脱氢皮质酮	72-23-1	C05490	Lipids and lipid-like molecules	脂质和类脂分子	Steroids and steroid derivatives	甾类和甾类衍生物	Hydroxysteroids	羟类固醇	3.45684	3.9199	3.49697	3.62457	3.17618	3.39488	3.10017	3.22374	1.68567	0.0807675	0.962514	0.889414	-0.169073
156	2,3-Dihydroxybenzoic acid (Pyrocatechuic acid)	3.68	level1			153.019	14.2	NEG	C7H6O4	HMDB0000397	2,3-二羟基苯甲酸	303-38-8	C00196	Benzenoids	苯环型化合物	Benzene and substituted derivatives	苯和取代衍生物	Benzoic acids and derivatives	苯甲酸及衍生物	0.130289	0.201485	0.151551	0.161108	0.1372	0.0506864	0.101655	0.0965136	1.5192	0.120224	0.962514	0.599061	-0.739226
157	3-Hydroxyisobutyric acid	3.68	level1			103.04	133.4	NEG	C4H8O3	HMDB0000023	( S ) - 3 -羟基异丁酸	2068-83-9	C06001	Organic acids and derivatives	有机酸及其衍生物	Hydroxy acids and derivatives	羟基酸及衍生物	Beta hydroxy acids and derivatives	Beta-羟基酸及衍生物	0.51268	0.792291	0.560491	0.621821	0.558931	0.469181	0.496885	0.508332	1.20787	0.27735	0.962514	0.81749	-0.290728
158	beta-Muricholic acid	3.68	level1			407.279	131.6	NEG	C24H40O5	HMDB0000415	beta-鼠胆酸	2393-59-1	C17726	Lipids and lipid-like molecules	脂质和类脂分子	Steroids and steroid derivatives	甾类和甾类衍生物	Bile acids, alcohols and derivatives	胆汁酸类、醇类及其衍生物	6.87516e-06	6.18187e-06	0.0313999	0.010471	0.0184864	0.0176823	0.0134082	0.0165256	1.50874	0.622756	0.966158	1.57823	0.658307
159	Oxypurinol	3.68	level1			151.025	114.7	NEG	C5H4N4O2	HMDB0000786		2465-59-0	C07599	Organoheterocyclic compounds	有机杂环化合物	Imidazopyrimidines	咪唑并嘧啶	Purines and purine derivatives	嘌呤和嘌呤衍生物	0.599315	0.0214822	0.710029	0.443609	0.495189	0.529201	0.311489	0.445293	0.617991	0.994359	0.999955	1.0038	0.00546706
160	Dimethadione	3.68	level1			128.035	100.5	NEG	C5H7NO3	HMDB0061093	二甲双酮	695-53-4	D03838	Organoheterocyclic compounds	有机杂环化合物	Azolidines	氮杂环戊烷	Oxazolidines	恶唑烷	0.160595	0.249741	0.118575	0.176304	0.104681	0.132168	0.127843	0.121564	1.26125	0.239052	0.962514	0.689515	-0.536346
161	Docebenone	3.68	level1			325.183	62.4	NEG	C21H26O3	HMDB0247732	多西苯醌	80809-81-0	C01349	Lipids and lipid-like molecules	脂质和类脂分子	Fatty Acyls	脂肪酰类	Fatty alcohols	脂肪醇	0.239306	6.18187e-06	0.243099	0.160804	0.236137	0.227047	0.257465	0.240216	0.953531	0.42766	0.962514	1.49385	0.579033
162	2-Ethyl-2-hydroxybutyric acid	3.68	level1			131.071	40.7	NEG	C6H12O3	HMDB0001975	2 -乙基- 2 -羟基丁酸	3639-21-2		Lipids and lipid-like molecules	脂质和类脂分子	Fatty Acyls	脂肪酰类	Fatty acids and conjugates	脂肪酸和聚合物	6.87516e-06	0.873208	0.615502	0.496239	0.791907	0.52202	1.36442	0.892783	1.1081	0.331141	0.962514	1.7991	0.847275
163	Isovaleric acid	3.68	level1			101.06	40.4	NEG	C5H10O2	HMDB0000718	异戊酸	503-74-2	C08262	Lipids and lipid-like molecules	脂质和类脂分子	Fatty Acyls	脂肪酰类	Fatty acids and conjugates	脂肪酸和聚合物	0.0488295	0.0599029	0.0642944	0.0576756	0.0525489	0.0566115	0.0628167	0.0573257	0.132529	0.952199	0.999955	0.993934	-0.00877827
164	Valeric acid	3.68	level1			101.06	40.4	NEG	C5H10O2	HMDB0000892	戊酸	109-52-4	C00803	Lipids and lipid-like molecules	脂质和类脂分子	Fatty Acyls	脂肪酰类	Fatty acids and conjugates	脂肪酸和聚合物	0.0488295	0.0599029	0.0642944	0.0576756	0.0525489	0.0566115	0.0628167	0.0573257	0.132529	0.952199	0.999955	0.993934	-0.00877827
165	2-Ketobutyric acid	3.68	level1			101.024	38.2	NEG	C4H6O3	HMDB0000005	2-氧代丁酸	600-18-0	C00109	Organic acids and derivatives	有机酸及其衍生物	Keto acids and derivatives	酮酸及衍生物	Short-chain keto acids and derivatives	短链酮酸及衍生物	0.394015	0.275715	0.33695	0.33556	0.293916	0.393866	0.292181	0.326654	0.239681	0.861609	0.999866	0.97346	-0.0388063
166	13-(Dodecan-2-yl)-6-(1-hydroxyethyl)-3-(hydroxymethyl)-12-methyl-9-(propan-2-yl)-1-oxa-4,7,10-triazacyclotridecane-2,5,8,11-tetrone	3.68	level2			540.365	121	NEG	C28H51N3O7					Organic acids and derivatives	有机酸及其衍生物	Peptidomimetics	拟肽类	Depsipeptides		12.3693	6.61063	38.7044	19.2281	35.9362	29.6699	16.9083	27.5048	0.983275	0.506449	0.962514	1.43045	0.516468
167	trans-Vaccenic acid	3.68	level1			281.247	18.9	NEG	C18H34O2	HMDB0003231	反异油酸	693-72-1	C08367	Lipids and lipid-like molecules	脂质和类脂分子	Fatty Acyls	脂肪酰类	Fatty acids and conjugates	脂肪酸和聚合物	12.3693	6.61063	38.7044	19.2281	35.9362	29.6699	16.9083	27.5048	0.983275	0.506449	0.962514	1.43045	0.516468
168	TBHQ	3.68	level1			165.091	14.7	NEG	C10H14O2	HMDB0032062	叔丁基对苯二酚	1948-33-0		Benzenoids	苯环型化合物	Benzene and substituted derivatives	苯和取代衍生物	Phenylpropanes	苯丙烷	1.32485	0.782004	1.57794	1.22826	1.53962	1.00557	1.71632	1.4205	0.623891	0.577471	0.962912	1.15651	0.209779
169	Amoxapine	3.68	level1			314.106	13.8	POS	C17H16ClN3O	HMDB0014683	阿莫沙平	14028-44-5	D00228	Organoheterocyclic compounds	有机杂环化合物	Benzoxazepines	苯并氧氮环庚三烯	Dibenzoxazepines	二苯并氧氮环庚三烯	0.116766	0.0725898	0.141902	0.110419	0.144245	0.0442267	0.0741202	0.0875305	0.917866	0.55845	0.962514	0.79271	-0.335134
170	3-Methoxyphenylacetic acid	3.67	level1			165.055	62.1	NEG	C9H10O3	HMDB0059969	3-甲氧基苯乙酸	1798-09-0		Benzenoids	苯环型化合物	Phenol ethers	酚醚类	Anisoles	甲氧基苯	0.0599663	6.18187e-06	0.0250888	0.0283538	0.0182812	0.0672157	6.43614e-06	0.0285011	0.122794	0.995838	0.999955	1.0052	0.00747638
171	3-Phenylpropanoic acid	3.67	level1			149.06	37.3	NEG	C9H10O2	HMDB0000764	β-苯丙酸	501-52-0	C05629	Phenylpropanoids and polyketides	苯丙素类和聚酮类	Phenylpropanoic acids	苯丙酸类	Phenylpropanoic acids	苯丙酸类	0.0229714	0.0259412	0.0146068	0.0211731	0.0122569	6.39171e-06	0.0202335	0.0108323	1.09869	0.202484	0.962514	0.511605	-0.966898
172	p-Anisic acid	3.67	level1			151.039	37.9	NEG	C8H8O3	HMDB0001101	p-茴香酸	100-09-4	C02519	Benzenoids	苯环型化合物	Benzene and substituted derivatives	苯和取代衍生物	Benzoic acids and derivatives	苯甲酸及衍生物	0.126577	0.143646	0.0788154	0.116346	0.077436	0.0627512	0.127012	0.0890665	0.972334	0.376817	0.962514	0.76553	-0.385469
173	Gentisic acid	3.67	level1			153.019	14.2	NEG	C7H6O4	HMDB0000152	龙胆酸	490-79-9	C00628	Benzenoids	苯环型化合物	Benzene and substituted derivatives	苯和取代衍生物	Benzoic acids and derivatives	苯甲酸及衍生物	0.130289	0.201485	0.151551	0.161108	0.1372	0.0506864	0.101655	0.0965136	1.5192	0.120224	0.962514	0.599061	-0.739226
174	2-Hydroxyhexanoic acid	3.67	level1			131.071	40.7	NEG	C6H12O3	HMDB0001624	2 -羟基己酸	6064-63-7		Lipids and lipid-like molecules	脂质和类脂分子	Fatty Acyls	脂肪酰类	Fatty acids and conjugates	脂肪酸和聚合物	6.87516e-06	0.873208	0.615502	0.496239	0.791907	0.52202	1.36442	0.892783	1.1081	0.331141	0.962514	1.7991	0.847275
175	Tauro-beta-muricholic acid	3.67	level1			514.282	118	NEG	C26H45NO7S	HMDB0000932	牛磺酸	145022-92-0		Lipids and lipid-like molecules	脂质和类脂分子	Steroids and steroid derivatives	甾类和甾类衍生物	Bile acids, alcohols and derivatives	胆汁酸类、醇类及其衍生物	1.5271	0.835937	1.22137	1.1948	0.988597	0.65796	3.75222	1.79959	0.35502	0.578365	0.962912	1.50618	0.590899
176	3,3-Dimethylglutaric acid	3.67	level1			159.066	65.9	NEG	C7H12O4	HMDB0002441	3，3 -二甲基戊二酸	4839-46-7		Lipids and lipid-like molecules	脂质和类脂分子	Fatty Acyls	脂肪酰类	Fatty acids and conjugates	脂肪酸和聚合物	0.439387	0.665207	0.725102	0.609899	0.669742	0.120088	0.521149	0.436993	0.995892	0.404695	0.962514	0.716501	-0.48096
177	3-(2,5-Dimethoxyphenyl)propionic acid	3.67	level1			209.081	26.4	NEG	C11H14O4		3 - ( 2 , 5 -二甲氧基苯基)丙酸	10538-49-5		Phenylpropanoids and polyketides	苯丙素类和聚酮类	Phenylpropanoic acids	苯丙酸类	Phenylpropanoic acids	苯丙酸类	0.045865	0.0519202	0.0378093	0.0451982	0.0360945	0.0815249	0.0916507	0.0697567	1.26201	0.234616	0.962514	1.54335	0.626068
178	Mandelic acid	3.66	level1			151.039	37.9	NEG	C8H8O3	HMDB0062635	( r ) -扁桃酸	611-71-2	C01983	Benzenoids	苯环型化合物	Benzene and substituted derivatives	苯和取代衍生物	Benzene and substituted derivatives	苯和取代衍生物	0.126577	0.143646	0.0788154	0.116346	0.077436	0.0627512	0.127012	0.0890665	0.972334	0.376817	0.962514	0.76553	-0.385469
179	3,4-Dihydroxyphenylglycol	3.66	level1			151.039	24.1	NEG	C8H10O4	HMDB0000318	3，4 -二羟基苯乙二醇	28822-73-3	C05576	Benzenoids	苯环型化合物	Phenols	酚类	Benzenediols	苯二酚	0.173398	0.174046	0.0681933	0.138546	0.0630066	0.088705	0.145681	0.099131	0.762944	0.409485	0.962514	0.715511	-0.482955
180	3-(2-Methoxyphenyl)propanoic acid	3.66	level1			179.071	16.3	NEG	C10H12O3		3 - ( 2 -甲氧基苯基)丙酸	6342-77-4		Phenylpropanoids and polyketides	苯丙素类和聚酮类	Phenylpropanoic acids	苯丙酸类	Phenylpropanoic acids	苯丙酸类	0.155404	0.0283351	0.13367	0.105803	0.159379	0.112688	0.1686	0.146889	0.928309	0.392297	0.962514	1.38833	0.473348
181	Propylgallate	3.66	level1			211.06	39	NEG	C10H12O5	HMDB0033835	没食子酸丙酯	121-79-9	C11155	Benzenoids	苯环型化合物	Benzene and substituted derivatives	苯和取代衍生物	Benzoic acids and derivatives	苯甲酸及衍生物	0.0558454	6.18187e-06	0.0447289	0.0335268	0.0434972	0.0229139	0.0451456	0.0371855	0.853937	0.852892	0.999442	1.10913	0.149425
182	Arabinono-1,4-lactone	3.65	level1			147.029	32.8	NEG	C5H8O5	HMDB0001900	L-阿拉伯糖-1,4-内酯	51532-86-6	C01114	Organic oxygen compounds	有机含氧化合物	Organooxygen compounds	有机氧化合物	Carbohydrates and carbohydrate conjugates	碳水化合物和碳水化合物结合物	0.0813313	0.0698842	0.0702148	0.0738101	0.0423441	0.0682882	0.0650339	0.0585554	1.29309	0.164791	0.962514	0.793325	-0.334015
183	Acetoin	3.64	level1			87.0447	104.4	NEG	C4H8O2	HMDB0003243	3-羟基丁酮	513-86-0	C00466	Organic oxygen compounds	有机含氧化合物	Organooxygen compounds	有机氧化合物	Carbonyl compounds	羰基化合物	0.153213	0.155711	0.100347	0.136424	0.103131	0.0730772	0.163726	0.113311	0.80959	0.512531	0.962514	0.830584	-0.267801
184	2,4-Dihydroxybenzoic acid	3.64	level1			153.019	14.2	NEG	C7H6O4	HMDB0029666	2,4-二羟基苯甲酸	89-86-1		Benzenoids	苯环型化合物	Benzene and substituted derivatives	苯和取代衍生物	Benzoic acids and derivatives	苯甲酸及衍生物	0.130289	0.201485	0.151551	0.161108	0.1372	0.0506864	0.101655	0.0965136	1.5192	0.120224	0.962514	0.599061	-0.739226
185	2,4-Dihydroxybutanoic acid	3.64	level1			101.024	256.9	NEG	C4H8O4	HMDB0000360	2，4 -二羟基丁酸	1518-62-3		Organic acids and derivatives	有机酸及其衍生物	Hydroxy acids and derivatives	羟基酸及衍生物	Short-chain hydroxy acids and derivatives	短链羟基酸及衍生物	0.344421	6.18187e-06	0.327636	0.224021	0.31856	0.299092	6.43614e-06	0.205886	0.123524	0.910961	0.999955	0.919048	-0.121788
186	2-Hydroxyoctanoic acid	3.64	level1			159.102	38.6	NEG	C8H16O3	HMDB0000711	2 -羟基辛酸	617-73-2		Lipids and lipid-like molecules	脂质和类脂分子	Fatty Acyls	脂肪酰类	Fatty acids and conjugates	脂肪酸和聚合物	0.420657	0.41257	0.466281	0.433169	0.445365	0.173053	0.215282	0.2779	1.60116	0.146204	0.962514	0.64155	-0.640365
187	Amlexanox	3.64	level1			281.09	5.3	POS	C16H14N2O4	HMDB0015160	氨来呫诺	68302-57-8	D01828	Organoheterocyclic compounds	有机杂环化合物	Benzopyrans	苯并吡喃	1-benzopyrans	1-苯并吡喃	0.0310701	0.0288205	0.0340226	0.0313044	0.0322818	0.0319486	0.0314881	0.0319062	0.461563	0.729538	0.982843	1.01922	0.0274687
188	Indole-3-propionic acid	3.63	level1			188.071	38.7	NEG	C11H11NO2	HMDB0002302	吲哚丙酸	830-96-6	C22236	Organoheterocyclic compounds	有机杂环化合物	Indoles and derivatives	吲哚和衍生物	Indolyl carboxylic acids and derivatives	吲哚基羧酸及衍生物	0.200177	6.18187e-06	0.0959035	0.0986956	0.0919168	0.170952	6.43614e-06	0.0876251	0.125659	0.891277	0.999955	0.887832	-0.171641
189	Ferulate	3.63	level1			193.05	110.2	NEG	C10H10O4	HMDB0000954	阿魏酸	537-98-4	C01494	Phenylpropanoids and polyketides	苯丙素类和聚酮类	Cinnamic acids and derivatives	肉桂酸及其衍生物	Hydroxycinnamic acids and derivatives	羟基肉桂酸及其衍生物	6.87516e-06	0.0719365	0.00536171	0.0257684	0.00641959	0.0232654	0.0444239	0.024703	1.04804	0.968817	0.999955	0.958655	-0.060916
190	Phloroglucinaldehyde	3.62	level1			153.019	14.2	NEG	C7H6O4	HMDB0125090	2,4,6-三羟基苯甲醛	487-70-7		Benzenoids	苯环型化合物	Phenols	酚类	Benzenetriols and derivatives	苯三酚及衍生物	0.130289	0.201485	0.151551	0.161108	0.1372	0.0506864	0.101655	0.0965136	1.5192	0.120224	0.962514	0.599061	-0.739226
191	Apocholic acid	3.62	level1			373.277	134.9	POS	C24H38O4		原胆酸	641-81-6	C15375	Lipids and lipid-like molecules	脂质和类脂分子	Steroids and steroid derivatives	甾类和甾类衍生物	Bile acids, alcohols and derivatives	胆汁酸类、醇类及其衍生物	2.38509e-05	2.21526e-05	0.00343979	0.00116193	0.00494105	0.00600132	0.00131993	0.00408743	1.55522	0.182885	0.962514	3.51779	1.81467
192	Dimethylmalonic acid	3.62	level1			131.034	104.4	NEG	C5H8O4	HMDB0002001	二甲基丙二酸	595-46-0		Organic acids and derivatives	有机酸及其衍生物	Carboxylic acids and derivatives	羧酸及衍生物	Dicarboxylic acids and derivatives	二羧酸及衍生物	0.138663	0.145087	0.102729	0.128827	0.100272	0.0921202	0.159013	0.117135	0.548185	0.662557	0.972304	0.909246	-0.137258
193	2-Hydroxymethyl benzoic acid	3.61	level1			151.039	37.9	NEG	C8H8O3	HMDB0032594	2 - (羟甲基)苯甲酸	612-20-4	C10804	Benzenoids	苯环型化合物	Benzene and substituted derivatives	苯和取代衍生物	Benzoic acids and derivatives	苯甲酸及衍生物	0.126577	0.143646	0.0788154	0.116346	0.077436	0.0627512	0.127012	0.0890665	0.972334	0.376817	0.962514	0.76553	-0.385469
194	Glucono-1,5-lactone	3.61	level1			177.04	181.8	NEG	C6H10O6	HMDB0000150	葡萄糖酸内酯	90-80-2	C00198	Organic oxygen compounds	有机含氧化合物	Organooxygen compounds	有机氧化合物	Carbohydrates and carbohydrate conjugates	碳水化合物和碳水化合物结合物	0.0339247	0.0361105	0.0291195	0.0330516	0.0290739	0.0336325	0.040097	0.0342678	0.416867	0.765342	0.988238	1.0368	0.0521326
195	2-Methylbutyrylglycine	3.61	level1			158.082	160.4	NEG	C7H13NO3	HMDB0000339	2 -甲基丁酰甘氨酸	52320-67-9		Organic acids and derivatives	有机酸及其衍生物	Carboxylic acids and derivatives	羧酸及衍生物	Amino acids, peptides, and analogues	氨基酸、肽和类似物	0.0087806	0.0121597	0.0119159	0.0109521	0.0116285	0.00750605	0.0102126	0.00978236	0.74499	0.511875	0.962514	0.893198	-0.162948
196	Quercetin	3.61	level1			301.038	15.5	NEG	C15H10O7	HMDB0005794	槲皮素	117-39-5	C00389	Phenylpropanoids and polyketides	苯丙素类和聚酮类	Flavonoids	黄酮类	Flavones	黄酮	0.400635	0.457871	6.34955e-06	0.286171	6.30815e-06	0.382036	0.623866	0.335303	0.0914174	0.842493	0.999143	1.17169	0.228588
197	3-IsopropoxybenzoicAcid	3.59	level1			179.071	16.3	NEG	C10H12O3		3 -异丙氧基苯甲酸	60772-67-0		Benzenoids	苯环型化合物	Benzene and substituted derivatives	苯和取代衍生物	Benzoic acids and derivatives	苯甲酸及衍生物	0.155404	0.0283351	0.13367	0.105803	0.159379	0.112688	0.1686	0.146889	0.928309	0.392297	0.962514	1.38833	0.473348
198	3-Hydroxydecanoic acid	3.59	level1			187.133	39.3	NEG	C10H20O3	HMDB0002203	( 3S ) - 3 -羟基癸酸	19526-23-9		Organic acids and derivatives	有机酸及其衍生物	Hydroxy acids and derivatives	羟基酸及衍生物	Medium-chain hydroxy acids and derivatives	中链羟基酸及衍生物	0.189702	0.202954	0.162163	0.184939	0.161696	0.0641468	0.135714	0.120519	1.49589	0.110664	0.962514	0.651668	-0.617791
199	1,3-Dimethylpyrazole	3.59	level1			97.0771	7.6	POS	C5H8N2		1，3 -二甲基吡唑	694-48-4		Organoheterocyclic compounds	有机杂环化合物	Azoles	吡咯类	Pyrazoles	吡唑	0.00128983	0.123697	0.126234	0.0837404	0.128742	0.000809706	0.000685349	0.0434125	0.888968	0.534	0.962514	0.518418	-0.947813
200	Mercaptopurine	3.57	level1			151.006	111.8	NEG	C5H4N4S	HMDB0015167	巯基嘌呤	50-44-2	C02380	Organoheterocyclic compounds	有机杂环化合物	Imidazopyrimidines	咪唑并嘧啶	Purines and purine derivatives	嘌呤和嘌呤衍生物	0.0937471	0.104105	0.174407	0.124086	0.175202	0.135317	0.0642401	0.124919	0.197258	0.984824	0.999955	1.00671	0.00965441
201	7-Ketolithocholic acid	3.56	level1			373.277	134.9	POS	C24H38O4	HMDB0000467	7-酮石胆酸	4651-67-6		Lipids and lipid-like molecules	脂质和类脂分子	Steroids and steroid derivatives	甾类和甾类衍生物	Bile acids, alcohols and derivatives	胆汁酸类、醇类及其衍生物	2.38509e-05	2.21526e-05	0.00343979	0.00116193	0.00494105	0.00600132	0.00131993	0.00408743	1.55522	0.182885	0.962514	3.51779	1.81467
202	2-Aminoisobutyric acid	3.55	level1			104.072	309.2	POS	C4H9NO2	HMDB0001906	2-氨基异丁酸	62-57-7	C03665	Organic acids and derivatives	有机酸及其衍生物	Carboxylic acids and derivatives	羧酸及衍生物	Amino acids, peptides, and analogues	氨基酸、肽和类似物	0.669536	0.604977	0.683407	0.65264	2.38091e-05	2.49534e-05	0.687012	0.22902	1.49038	0.20442	0.962514	0.350914	-1.51081
203	2-Aminobutyric acid	3.55	level1			104.072	309.2	POS	C4H9NO2	HMDB0000452	L-2-氨基丁酸	1492-24-6	C02356	Organic acids and derivatives	有机酸及其衍生物	Carboxylic acids and derivatives	羧酸及衍生物	Amino acids, peptides, and analogues	氨基酸、肽和类似物	0.669536	0.604977	0.683407	0.65264	2.38091e-05	2.49534e-05	0.687012	0.22902	1.49038	0.20442	0.962514	0.350914	-1.51081
204	Imazamethabenz	3.55	level1			275.142	124.5	POS	C15H18N2O3	HMDB0034885	咪草酸	100728-84-5	C11083	Organic acids and derivatives	有机酸及其衍生物	Carboxylic acids and derivatives	羧酸及衍生物	Amino acids, peptides, and analogues	氨基酸、肽和类似物	2.38509e-05	0.219622	0.195525	0.13839	0.291368	0.251528	0.249439	0.264112	1.14119	0.150686	0.962514	1.90845	0.932403
205	Sulfapyridine	3.47	level1			248.047	14.6	NEG	C11H11N3O2S	HMDB0015028	磺胺吡啶	144-83-2	D02434	Benzenoids	苯环型化合物	Benzene and substituted derivatives	苯和取代衍生物	Benzenesulfonamides	苯磺酰胺	1.20236	0.759423	1.40959	1.12379	1.41342	0.897638	1.54676	1.28594	0.576345	0.587898	0.962978	1.14428	0.194446
206	L-Kynurenine	2.75	level2			209.091	66.1	POS	C10H12N2O3	HMDB0000684	L-犬尿氨酸	2922-83-0	C00328	Organic oxygen compounds	有机氧化合物	Organooxygen compounds	有机氧化合物	Carbonyl compounds	羰基化合物	3.81319	3.95628	3.1426	3.63736	0.964214	1.11705	2.15695	1.41274	1.93201	0.00785186	0.962514	0.388397	-1.3644
207	PC(38:2)	2.75	level2			796.622	19.2	POS	C46H88NO8P											1.40871	1.04623	1.03304	1.16266	1.20623	0.842587	0.483634	0.844149	1.37273	0.258814	0.962514	0.726051	-0.461857
208	1,2-Dimethylimidazole	2.75	level2			97.076	313.4	POS	C5H8N2	HMDB0244082				Organoheterocyclic compounds	有机杂环化合物	Azoles	吡咯类	Imidazoles	咪唑	0.42127	0.99581	0.478999	0.632026	1.09092	1.10426	0.953975	1.04972	1.6555	0.0914613	0.962514	1.66088	0.731944
209	Mildronate	2.75	level2			147.113	291.4	POS	C6H14N2O2	HMDB0254733				Organic acids and derivatives	有机酸及其衍生物	Carboxylic acids and derivatives	羧酸及衍生物	Amino acids, peptides, and analogues	氨基酸、肽和类似物	1.13427	2.12642	1.76332	1.67467	1.69635	2.26602	1.41605	1.79281	0.449128	0.773015	0.989088	1.07054	0.0983424
210	6-tert-Butyl-2H-1,2,4-triazine-3,5-dione	2.75	level2			170.092	287.5	POS	C7H11N3O2					Organoheterocyclic compounds	有机杂环化合物	Triazines		1,2,4-triazines		2.2315	2.21526e-05	3.6352	1.95557	3.02544	2.97171	1.7224	2.57318	0.92279	0.61699	0.965521	1.31582	0.395963
211	Adenosine 2'-monophosphate	2.75	level2			348.07	277.4	POS	C10H14N5O7P											0.0812828	0.163136	0.0252766	0.0898985	0.034533	0.0805499	0.133919	0.0830006	0.137791	0.895413	0.999955	0.92327	-0.115175
212	7,3',4',5'-Tetrahydroxyflavone	2.75	level2			287.055	256.6	POS	C15H10O6					Phenylpropanoids and polyketides	苯丙素类和聚酮类	Flavonoids	黄酮类	Flavones	黄酮	1.48264	2.00359	1.51235	1.6662	1.42157	2.37942	1.43837	1.74646	0.210534	0.833947	0.99863	1.04817	0.0678722
213	Piperolactam_C	2.75	level2			310.107	184.6	POS	C18H15NO4	HMDB0038584		116064-76-7		Alkaloids and derivatives	生物碱和衍生物	Aristolactams		Aristolactams		0.0506833	0.0893474	0.0417115	0.0605807	0.0317811	0.0196488	0.0615932	0.0376744	1.1749	0.298918	0.962514	0.621887	-0.685276
214	3-Hydroxybenzene-1-carboximidamide	2.75	level2			137.071	173.1	POS	C7H8N2O					Benzenoids	苯环型化合物	Phenols	酚类	1-hydroxy-4-unsubstituted benzenoids		1.44897	1.64862	1.21117	1.43626	1.26912	1.64488	1.0657	1.32657	0.634554	0.631525	0.967729	0.923629	-0.114614
215	4-Chloro-5,6,7,8-tetrahydroquinazolin-2-amine	2.75	level2			184.064	61.5	POS	C8H10ClN3					Organoheterocyclic compounds	有机杂环化合物	Diazanaphthalenes	二氮杂萘	Benzodiazines	苯并二嗪	3.59783	3.13284	1.59989	2.77685	1.60106	0.425113	2.23728	1.42115	1.33893	0.16695	0.962514	0.511784	-0.966393
216	1-Hexadecyl-2-(5Z,8Z,11Z,14Z-eicosatetraenoyl)-sn-glycero-3-phosphocholine	2.75	level2			768.59	18.9	POS	C44H82NO7P					Lipids and lipid-like molecules	脂质和类脂分子	Glycerophospholipids	甘油磷脂类	Glycerophosphocholines	甘油磷酸胆碱	2.30817	1.53393	1.57922	1.8071	1.52748	1.22033	0.78584	1.17788	1.65826	0.129654	0.962514	0.651808	-0.617481
217	p-(Isoamyloxy)aniline	2.75	level2			180.138	13.3	POS	C11H17NO	HMDB0341369				Benzenoids	苯环型化合物	Phenol ethers	酚醚类	Aminophenyl ethers		2.38509e-05	2.21526e-05	0.0254933	0.00851311	0.027974	2.49534e-05	0.0249266	0.0176419	0.766357	0.498067	0.962514	2.07231	1.05124
218	4-Ethyl-2,6-dimethoxyphenol	2.75	level2			183.102	12.9	POS	C10H14O3	HMDB0033394		14059-92-8		Benzenoids	苯环型化合物	Phenols	酚类	Methoxyphenols		0.139959	0.116543	0.118042	0.124848	0.0867159	0.0266745	0.0932279	0.0688728	1.51326	0.0675961	0.962514	0.551653	-0.858168
219	2-Methoxy-4-propylphenol	2.75	level2			167.107	12.8	POS	C10H14O2	HMDB0032135		2785-87-7		Benzenoids	苯环型化合物	Phenols	酚类	Methoxyphenols		0.00957762	0.00671062	0.00855555	0.00828126	0.00863828	2.49534e-05	0.00537775	0.00468033	1.11385	0.245357	0.962514	0.565171	-0.823241
220	5-Azacytosine	2.75	level2			113.046	9.5	POS	C3H4N4O					Organoheterocyclic compounds	有机杂环化合物	Triazines		1,3,5-triazines		0.100313	0.0967262	0.0968262	0.0979552	0.0980075	0.106471	2.34116e-05	0.0681672	1.08572	0.475179	0.962514	0.695901	-0.523045
221	D-(+)-Turanose	2.75	level2			365.105	226.5	POS	C12H22O11	HMDB0011740		547-25-1	C19636	Lipids and lipid-like molecules	脂质和类脂分子	Fatty Acyls	脂肪酰类	Fatty acyl glycosides	脂肪酰基糖苷	0.183012	0.126708	0.0432818	0.117667	0.0234225	0.0512928	0.0978885	0.0575346	1.09437	0.261528	0.962514	0.48896	-1.03221
222	CHES	2.75	level2			208.1	174.2	POS	C8H17NO3S	HMDB0255106				Organic nitrogen compounds	有机含氮化合物	Organonitrogen compounds	有机氮化合物	Cyclohexylamines		0.255633	0.0669293	1.8918	0.738119	2.12862	0.755856	0.664875	1.18312	1.05333	0.584047	0.962912	1.60288	0.680664
223	PC(35:3)	2.75	level2			752.559	34.2	POS	C43H80NO8P	HMDB0007947	1-十五碳酰基-2-二十碳三烯酰基-sn-甘油-3-磷酸胆碱			Lipids and lipid-like molecules	脂质和类脂分子	Glycerophospholipids	甘油磷脂类	Glycerophosphocholines	甘油磷酸胆碱	0.995779	0.750424	1.09508	0.947094	0.622653	0.378572	0.264268	0.421831	1.96181	0.0234012	0.962514	0.445395	-1.16684
224	PC(35:5)	2.75	level2			748.528	34.5	POS	C43H76NO8P											2.38509e-05	0.669848	0.453305	0.374393	0.549222	0.492475	0.3476	0.463099	1.03139	0.68932	0.976008	1.23693	0.306769
225	3-Amino-2-piperidone	2.74	level2			115.087	287.5	POS	C5H10N2O	HMDB0000323		1892-22-4		Organic acids and derivatives	有机酸及其衍生物	Carboxylic acids and derivatives	羧酸及衍生物	Amino acids, peptides, and analogues	氨基酸、肽和类似物	0.18716	0.387291	0.179953	0.251468	0.174037	0.238476	0.272281	0.228265	0.0766605	0.768933	0.988602	0.907729	-0.139667
226	2-(2,6-Dimethylmorpholin-4-yl)ethanol	2.74	level2			160.133	224.8	POS	C8H17NO2					Organoheterocyclic compounds	有机杂环化合物	Oxazinanes	恶嗪烷	Morpholines	吗啉	0.925236	2.26502	1.14399	1.44475	1.18437	2.11503	1.03418	1.44453	0.138737	0.999687	0.999961	0.999845	-0.000223324
227	4-Hydrazino-8-(trifluoromethyl)quinoline	2.74	level2			228.074	222.7	POS	C10H8F3N3					Organoheterocyclic compounds	有机杂环化合物	Quinolines and derivatives	喹啉及衍生物	Quinolines and derivatives		0.119178	0.175386	0.247865	0.18081	0.231552	0.0476632	0.165634	0.148283	0.723746	0.645167	0.970832	0.820105	-0.286119
228	1H-Imidazol-1-ylacetic acid	2.74	level2			127.05	221.3	POS	C5H6N2O2	HMDB0029736		22884-10-2		Organic acids and derivatives	有机酸及其衍生物	Carboxylic acids and derivatives	羧酸及衍生物	Amino acids, peptides, and analogues	氨基酸、肽和类似物	0.212065	2.21526e-05	0.208474	0.140187	0.210175	0.220515	0.207294	0.212662	0.956798	0.409804	0.962514	1.51698	0.601204
229	2-Imino-1-imidazolidineacetic acid	2.74	level2			144.077	220.7	POS	C5H9N3O2	HMDB0250642				Organic acids and derivatives	有机酸及其衍生物	Carboxylic acids and derivatives	羧酸及衍生物	Amino acids, peptides, and analogues	氨基酸、肽和类似物	2.14644	1.78068	2.14479	2.02397	2.20452	2.16952	2.16134	2.17846	1.1198	0.33151	0.962514	1.07633	0.106121
230	N-(3-Piperidinyl)acetamide	2.74	level2			143.118	214.6	POS	C7H14N2O					Organoheterocyclic compounds	有机杂环化合物	Piperidines	哌啶	Piperidines	哌啶	0.0835627	0.105525	0.0692909	0.0861261	0.0669664	0.0609997	0.0984627	0.0754763	0.69636	0.534476	0.962514	0.876345	-0.190428
231	4-Amino-8-(trifluoromethyl)quinoline	2.74	level2			213.064	212.1	POS	C10H7F3N2					Organoheterocyclic compounds	有机杂环化合物	Quinolines and derivatives	喹啉及衍生物	Aminoquinolines and derivatives		0.154311	0.23386	0.149624	0.179265	0.139306	0.014551	0.0970494	0.0836353	1.4	0.104556	0.962514	0.466547	-1.09991
232	1-Methyl-4-piperidinecarboxylic acid	2.74	level2			144.102	211.3	POS	C7H13NO2					Organoheterocyclic compounds	有机杂环化合物	Piperidines	哌啶	Piperidinecarboxylic acids and derivatives		1.07236	1.5267	1.40304	1.33403	1.37318	0.990661	0.741601	1.03515	1.2983	0.260643	0.962514	0.775954	-0.365956
233	3-Hydroxy-4'-methoxyflavone	2.74	level2			269.081	184.6	POS	C16H12O4					Phenylpropanoids and polyketides	苯丙素类和聚酮类	Flavonoids	黄酮类	Flavones	黄酮	0.0422328	0.0675352	0.0293049	0.0463576	0.0251043	0.0156007	0.0448601	0.0285217	1.19961	0.276102	0.962514	0.615254	-0.700747
234	1-(2-Methoxyethyl)piperazine	2.74	level2			145.133	174.8	POS	C7H16N2O					Organoheterocyclic compounds	有机杂环化合物	Diazinanes		Piperazines		0.0392419	0.0779947	0.0239188	0.0470518	0.0390001	0.0727363	0.0795454	0.0637606	1.01139	0.458699	0.962514	1.35511	0.438415
235	2,4-Diamino-6-nitrotoluene	2.74	level2			168.077	169.9	POS	C7H9N3O2	HMDB0060362			C16396	Benzenoids	苯环型化合物	Benzene and substituted derivatives	苯和取代衍生物	Nitrobenzenes		0.289703	0.262767	0.236702	0.263057	0.236881	0.102404	0.175033	0.17144	1.61533	0.0933142	0.962514	0.651721	-0.617674
236	6-Methyluracil	2.74	level2			127.05	168.4	POS	C5H6N2O2	HMDB0247093				Organoheterocyclic compounds	有机杂环化合物	Diazines	二氮杂苯	Pyrimidines and pyrimidine derivatives	嘧啶类和嘧啶类衍生物	2.0681	1.50488	1.89003	1.821	1.95894	2.49534e-05	2.14285	1.36727	1.00228	0.555174	0.962514	0.750835	-0.413432
237	1,2,3,4-Tetrahydroisoquinoline-6-carboxylic acid	2.74	level2			178.086	164.9	POS	C10H11NO2					Organoheterocyclic compounds	有机杂环化合物	Tetrahydroisoquinolines	四氢异喹啉	Tetrahydroisoquinolines	四氢异喹啉	0.0509749	0.106567	0.0566463	0.071396	0.0796067	0.21684	0.0242439	0.106897	0.14048	0.585345	0.962912	1.49724	0.582306
238	(1Z)-1-(3-Ethyl-5-hydroxy-1,3-benzothiazol-2-ylidene)acetone	2.74	level2			236.074	164.1	POS	C12H13NO2S					Organoheterocyclic compounds	有机杂环化合物	Benzothiazoles		Benzothiazoles		0.113663	0.145005	0.16355	0.14074	0.115607	0.158016	0.117503	0.130375	0.463516	0.632983	0.967913	0.926358	-0.110359
239	6-Acetylcodeine	2.74	level2			342.17	160.7	POS	C20H23NO4					Alkaloids and derivatives	生物碱和衍生物	Morphinans		Morphinans		0.0409217	0.113449	0.0928968	0.0824225	0.0773478	0.0465341	0.0514672	0.0584497	0.813656	0.367223	0.962514	0.709147	-0.495843
240	Quinolin-2-ol	2.74	level2			146.06	157.6	POS	C9H7NO					Organoheterocyclic compounds	有机杂环化合物	Quinolines and derivatives	喹啉及衍生物	Quinolones and derivatives	喹诺酮及衍生物	0.0817412	2.21526e-05	0.0830618	0.0549417	0.103888	0.0873402	0.0983215	0.0965164	0.997681	0.210298	0.962514	1.75671	0.812873
241	Isopongaflavone	2.74	level2			335.128	157	POS	C21H18O4					Phenylpropanoids and polyketides	苯丙素类和聚酮类	Flavonoids	黄酮类	Pyranoflavonoids		0.0599086	0.114397	0.0731342	0.0824798	0.0625478	0.0845462	0.0683363	0.0718101	0.463655	0.578738	0.962912	0.870638	-0.199855
242	3-Piperidin-4-ylpropanoic acid	2.74	level2			158.118	156.3	POS	C8H15NO2					Organoheterocyclic compounds	有机杂环化合物	Piperidines	哌啶	Piperidines	哌啶	2.38509e-05	0.13041	0.112713	0.081049	0.115677	0.141394	0.0903958	0.115822	1.06279	0.467951	0.962514	1.42904	0.515048
243	4-Piperidinecarboxamide	2.74	level2			129.102	142.1	POS	C6H12N2O					Organoheterocyclic compounds	有机杂环化合物	Piperidines	哌啶	Piperidinecarboxylic acids and derivatives		0.0556287	0.0439188	0.0545395	0.0513623	0.0618828	0.0590799	0.050691	0.0572179	0.992276	0.308694	0.962514	1.11401	0.155756
244	8-Methylquinolin-2(1H)-one	2.74	level2			160.076	138.9	POS	C10H9NO					Organoheterocyclic compounds	有机杂环化合物	Quinolines and derivatives	喹啉及衍生物	Quinolones and derivatives	喹诺酮及衍生物	0.408806	2.55743	0.0184941	0.994909	0.262691	0.365818	2.40416	1.01089	0.600116	0.988621	0.999955	1.01606	0.0229876
245	(-)-Cotinine	2.74	level2			177.102	138.8	POS	C10H12N2O					Organoheterocyclic compounds	有机杂环化合物	Pyridines and derivatives	吡啶及衍生物	Pyrrolidinylpyridines		0.225538	1.23656	0.0225466	0.494882	0.147491	0.189357	1.18221	0.506353	0.50535	0.982975	0.999955	1.02318	0.0330576
246	5,6,7,8-Tetrahydro-2(1H)-quinolinone	2.74	level2			150.091	136.7	POS	C9H11NO					Organoheterocyclic compounds	有机杂环化合物	Quinolines and derivatives	喹啉及衍生物	Quinolones and derivatives	喹诺酮及衍生物	0.109126	0.0998348	0.0118414	0.0736008	0.0119266	0.0108983	0.0829261	0.0352503	0.832639	0.382249	0.962514	0.47894	-1.06208
247	3,3'-Dimethoxybenzidine	2.74	level2			245.128	134.4	POS	C14H16N2O2	HMDB0246003			C19231	Benzenoids	苯环型化合物	Benzene and substituted derivatives	苯和取代衍生物	Biphenyls and derivatives		0.0305152	0.0730185	2.35453e-05	0.0345191	0.00677127	0.0173998	0.0677937	0.0306549	0.674815	0.898075	0.999955	0.888057	-0.171276
248	N-(2-Chlorobenzyl)-7H-purin-6-amine	2.74	level2			260.07	132.9	POS	C12H10ClN5					Organoheterocyclic compounds	有机杂环化合物	Imidazopyrimidines	咪唑并嘧啶	Purines and purine derivatives	嘌呤和嘌呤衍生物	0.0901671	0.0107945	0.514798	0.205253	0.249527	0.168782	0.294817	0.237709	0.950706	0.849841	0.999442	1.15812	0.211788
249	Fuberidazole	2.74	level2			185.071	132	POS	C11H8N2O	HMDB0341317			C18737	Organoheterocyclic compounds	有机杂环化合物	Benzimidazoles		Benzimidazoles		0.0614173	0.359979	0.0162125	0.145869	0.0247669	0.0353916	0.224384	0.0948475	0.113797	0.705893	0.97951	0.650222	-0.620995
250	8-Oxoadenine	2.74	level2			152.057	130.2	POS	C5H5N5O	HMDB0000542		21149-26-8		Organoheterocyclic compounds	有机杂环化合物	Imidazopyrimidines	咪唑并嘧啶	Purines and purine derivatives	嘌呤和嘌呤衍生物	0.103169	0.0705251	0.0428749	0.0721895	0.0475723	0.100975	0.0510672	0.0665381	0.27833	0.82901	0.997985	0.921714	-0.117609
251	2-Amino-5-methylhexanoic acid	2.74	level2			146.118	130	POS	C7H15NO2					Organic acids and derivatives	有机酸及其衍生物	Carboxylic acids and derivatives	羧酸及衍生物	Amino acids, peptides, and analogues	氨基酸、肽和类似物	0.0278257	0.0783103	0.0347265	0.0469542	0.0327398	0.117224	0.0256379	0.0585338	0.217504	0.74624	0.985047	1.24662	0.318018
252	7-Hydroxy-2-acetylaminofluorene	2.74	level2			240.102	124.9	POS	C15H13NO2					Benzenoids	苯环型化合物	Fluorenes		Fluorenes		0.0488563	0.116352	0.0673695	0.0775261	0.0699375	0.20862	0.0596544	0.112737	0.679027	0.536074	0.962514	1.45418	0.540211
253	Glycerophospho-N-palmitoylethanolamine	2.74	level2			454.293	122.4	POS	C21H44NO7P					Lipids and lipid-like molecules	脂质和类脂分子	Glycerophospholipids	甘油磷脂类	Glycerophosphoethanolamines	磷脂酰乙醇胺	1.3147	1.69489	0.750376	1.25332	0.806495	1.17387	0.593602	0.857989	1.15772	0.287494	0.962514	0.684572	-0.546726
254	N-Lauroyl-D-erythro-sphingosylphosphorylcholine	2.74	level2			647.512	108.4	POS	C35H71N2O6P	HMDB0012096			C00550	Lipids and lipid-like molecules	脂质和类脂分子	Sphingolipids	鞘脂类	Phosphosphingolipids	鞘磷脂	1.02099	0.954049	1.01067	0.995238	1.0799	0.610466	0.770212	0.820194	1.33283	0.331214	0.962514	0.824118	-0.279077
255	2-(4-Chlorophenyl)-4,5-dihydro-1H-imidazole	2.74	level2			181.053	76.6	POS	C9H9ClN2					Benzenoids	苯环型化合物	Benzene and substituted derivatives	苯和取代衍生物	Halobenzenes		0.132753	2.21526e-05	0.149782	0.0941859	0.145315	0.221995	0.186229	0.184513	1.0268	0.159006	0.962514	1.95903	0.970138
256	Tetrahydrozoline	2.74	level2			201.138	62.4	POS	C13H16N2	HMDB0258913			C07912	Benzenoids	苯环型化合物	Tetralins		Tetralins		0.0337134	0.0694398	0.0396911	0.0476147	0.017113	0.0730251	0.0926394	0.0609258	0.308282	0.625025	0.966658	1.27956	0.355645
257	5-(2-Furyl)-4H-1,2,4-triazol-3-amine	2.74	level2			151.061	58.1	POS	C6H6N4O					Organoheterocyclic compounds	有机杂环化合物	Azoles	吡咯类	Triazoles		0.218215	0.225044	0.465174	0.302811	0.46659	0.431244	0.211815	0.369883	0.581622	0.587203	0.962912	1.2215	0.288653
258	1-O-Hexadecyl-2-O-(5Z,8Z,11Z,14Z,17Z-eicosapentaenoyl)-sn-glyceryl-3-phosphorylcholine	2.74	level2			766.574	33.5	POS	C44H80NO7P	HMDB0039528		132196-28-2		Lipids and lipid-like molecules	脂质和类脂分子	Glycerophospholipids	甘油磷脂类	Glycerophosphocholines	甘油磷酸胆碱	2.38509e-05	2.21526e-05	1.78296	0.594336	1.65996	1.77481	1.58496	1.67324	1.60328	0.21026	0.962514	2.81531	1.4933
259	1-O-Hexadecyl-2-O-(4Z,7Z,10Z,13Z,16Z,19Z-docosahexaenoyl)-sn-glyceryl-3-phosphorylcholine	2.74	level2			792.59	33.5	POS	C46H82NO7P	HMDB0013409		132213-85-5		Lipids and lipid-like molecules	脂质和类脂分子	Glycerophospholipids	甘油磷脂类	Glycerophosphocholines	甘油磷酸胆碱	2.38509e-05	2.21526e-05	1.55496	0.518336	1.55039	1.27117	1.52612	1.44923	1.60168	0.151453	0.962514	2.79592	1.48332
260	N-Oleoyl-D-erythro-sphingosylphosphorylcholine	2.74	level2			729.59	29.3	POS	C41H81N2O6P	HMDB0012101		108392-10-5		Lipids and lipid-like molecules	脂质和类脂分子	Sphingolipids	鞘脂类	Phosphosphingolipids	鞘磷脂	1.50534	1.22562	1.36823	1.3664	2.38091e-05	1.53959	2.34116e-05	0.513212	1.5391	0.236385	0.962514	0.375596	-1.41275
261	4-(1-Pyrazolyl)benzaldehyde	2.74	level2			173.071	24.7	POS	C10H8N2O					Organoheterocyclic compounds	有机杂环化合物	Azoles	吡咯类	Pyrazoles	吡唑	3.5954	14.7884	0.131538	6.17178	1.6268	2.25804	10.8069	4.89723	0.447018	0.822505	0.997626	0.793488	-0.333719
262	1-(1Z-Octadecenyl)-2-(5Z,8Z,11Z,14Z-eicosatetraenoyl)-sn-glycero-3-phosphocholine	2.74	level2			794.605	18.9	POS	C46H84NO7P	HMDB0011253				Lipids and lipid-like molecules	脂质和类脂分子	Glycerophospholipids	甘油磷脂类	Glycerophosphocholines	甘油磷酸胆碱	2.18381	1.59713	1.76071	1.84722	1.56976	1.27869	1.11025	1.31957	1.84398	0.0748197	0.962514	0.714355	-0.485286
263	2,4,6-Trimethylpyridine	2.74	level2			122.096	16.6	POS	C8H11N	HMDB0245482				Organoheterocyclic compounds	有机杂环化合物	Pyridines and derivatives	吡啶及衍生物	Methylpyridines	甲基吡啶	0.267814	0.312277	0.160529	0.246874	0.16017	0.25975	0.364133	0.261351	0.242367	0.854688	0.999442	1.05864	0.0822163
264	3-(4-Hydroxyanilino)-5,5-dimethyl-2-cyclohexen-1-one	2.74	level2			232.133	16.4	POS	C14H17NO2					Benzenoids	苯环型化合物	Benzene and substituted derivatives	苯和取代衍生物	Aniline and substituted anilines		0.199597	0.0493457	0.260869	0.169937	0.141513	0.0638772	0.032286	0.0792253	1.17018	0.268893	0.962514	0.466204	-1.10097
265	Pyroquilon	2.74	level2			174.091	15.8	POS	C11H11NO	HMDB0037113		57369-32-1	C18487	Organoheterocyclic compounds	有机杂环化合物	Quinolines and derivatives	喹啉及衍生物	Quinolones and derivatives	喹诺酮及衍生物	0.333637	0.310218	0.477494	0.373783	0.452369	0.0922006	0.281447	0.275339	1.03822	0.445402	0.962514	0.736627	-0.440994
266	6-Amino-1-hexanol	2.74	level2			118.123	15.3	POS	C6H15NO					Organic nitrogen compounds	有机含氮化合物	Organonitrogen compounds	有机氮化合物	Amines	胺	0.15772	0.216507	0.0863646	0.15353	0.198231	0.251447	0.186851	0.212176	1.23451	0.240365	0.962514	1.38198	0.46674
267	2-Anilinocyclohexanone	2.74	level2			190.123	14.6	POS	C12H15NO					Organic nitrogen compounds	有机含氮化合物	Organonitrogen compounds	有机氮化合物	Amines	胺	0.0954923	0.140945	0.0185224	0.0849865	0.0243752	0.0110884	0.087947	0.0411369	0.898467	0.364343	0.962514	0.48404	-1.0468
268	6,6,8-Trimethyl-5,6-dihydro-[1,3]dioxolo[4,5-g]quinoline	2.74	level2			218.118	13.3	POS	C13H15NO2					Organoheterocyclic compounds	有机杂环化合物	Quinolines and derivatives	喹啉及衍生物	Quinolones and derivatives	喹诺酮及衍生物	0.0574127	0.0361464	0.0630566	0.0522052	0.0703	0.0165722	0.0379683	0.0416135	0.921617	0.580481	0.962912	0.797114	-0.327142
269	3-Hydroxyadamantan-1-carboxylic acid	2.74	level2			197.117	12.8	POS	C11H16O3					Organic oxygen compounds	有机含氧化合物	Organooxygen compounds	有机氧化合物	Alcohols and polyols		0.0994064	0.118507	0.113107	0.11034	0.11665	2.49534e-05	0.117117	0.0779307	1.00994	0.493819	0.962514	0.706278	-0.501693
270	Gartanin	2.74	level2			395.15	8.3	NEG	C23H24O6	HMDB0030700		33390-42-0	C10063	Organoheterocyclic compounds	有机杂环化合物	Benzopyrans	苯并吡喃	1-benzopyrans	1-苯并吡喃	0.000434986	0.000791801	0.000248983	0.000491923	0.00420094	0.0628901	0.000485126	0.0225254	1.41072	0.389472	0.962514	45.7905	5.51697
271	(R)-4-aminoisoxazolidin-3-one	2.74	level2			103.05	208	POS	C3H6N2O2	HMDB0014405		68-41-7	C08057	Organoheterocyclic compounds	有机杂环化合物	Azolines	氮杂环戊烯	Isoxazolines		0.67362	0.553886	0.637346	0.621617	0.540367	0.533255	0.572757	0.548793	1.58189	0.123904	0.962514	0.882847	-0.179765
272	Etofylline	2.74	level2			225.098	189	POS	C9H12N4O3	HMDB0252111				Organoheterocyclic compounds	有机杂环化合物	Imidazopyrimidines	咪唑并嘧啶	Purines and purine derivatives	嘌呤和嘌呤衍生物	0.0853268	0.144523	0.119425	0.116425	0.114883	0.0893228	0.122769	0.108992	0.242916	0.727761	0.982537	0.936155	-0.0951807
273	Pilocarpine	2.74	level2			209.128	167	POS	C11H16N2O2	HMDB0015217		54-71-7	C07474	Alkaloids and derivatives	生物碱和衍生物	Alkaloids and derivatives	生物碱和衍生物	Alkaloids and derivatives	生物碱和衍生物	0.0678083	0.0855974	0.0815677	0.0783245	0.0862698	0.0442933	0.0527022	0.0610884	1.32111	0.282968	0.962514	0.77994	-0.358564
274	Piperidine	2.74	level2			86.0963	157.8	POS	C5H11N	HMDB0034301		110-89-4	C01746	Organoheterocyclic compounds	有机杂环化合物	Piperidines	哌啶	Piperidines	哌啶	3.40427	2.21526e-05	3.42258	2.27562	3.46255	3.54785	3.88289	3.6311	0.967263	0.355553	0.962514	1.59565	0.674145
275	Octaethylene glycol	2.74	level2			393.209	30.5	POS	C16H34O9	HMDB0094680				Organic oxygen compounds	有机含氧化合物	Organooxygen compounds	有机氧化合物	Ethers	醚	0.638001	0.535435	0.652833	0.608756	0.646681	0.798374	2.34116e-05	0.481693	1.05776	0.656866	0.972016	0.791274	-0.337752
276	Cystine-glutathione	2.74	level2			427.095	272.4	POS	C13H22N4O8S2	HMDB0000656	胱氨酸-谷胱甘肽	13081-14-6	C05526	Organic acids and derivatives	有机酸及其衍生物	Carboxylic acids and derivatives	羧酸及衍生物	Amino acids, peptides, and analogues	氨基酸、肽和类似物	0.234595	0.228253	0.242837	0.235228	0.256025	0.280612	0.228432	0.255023	1.13853	0.274636	0.962514	1.08415	0.116567
277	S1P(d18:1)	2.74	level2			380.256	176.6	POS	C18H38NO5P	HMDB0000277	磷酸鞘胺醇	26993-30-6	C06124	Lipids and lipid-like molecules	脂质和类脂分子	Sphingolipids	鞘脂类	Phosphosphingolipids	鞘磷脂	0.0723081	0.0596393	0.0438389	0.0585954	0.0553483	0.0842537	0.0417634	0.0604551	0.0226613	0.90727	0.999955	1.03174	0.0450755
278	Hexadecenedioylcarnitine (Car(16:1-O2))	2.74	level2			428.301	173.1	POS	C23H41NO6											0.0378505	0.0575699	0.0174352	0.0376186	0.0183039	0.0705225	0.0340085	0.040945	0.166359	0.871701	0.999955	1.08843	0.122243
279	Allose	2.74	level2			203.053	170.6	POS	C6H12O6	HMDB0062473	(2R,3R,4R)-2,3,4,5,6-五羟基己醛	39392-62-6	C01487	Organic oxygen compounds	有机含氧化合物	Organooxygen compounds	有机氧化合物	Carbohydrates and carbohydrate conjugates	碳水化合物和碳水化合物结合物	0.52514	0.608536	0.597982	0.577219	0.588515	0.552309	0.807551	0.649458	0.974946	0.437951	0.962514	1.12515	0.170118
280	PC(18:0)	2.74	level2			520.34	144.2	POS	C26H52NO8P		1 -乙酰基- 2 -十六碳酰- sn -甘油-3 -磷酸胆碱	217075-01-9		Lipids and lipid-like molecules	脂质和类脂分子	Glycerophospholipids	甘油磷脂类	Glycerophosphocholines	甘油磷酸胆碱	0.139183	0.244416	0.0947857	0.159462	0.0872023	0.081559	0.198254	0.122338	0.653668	0.55962	0.962514	0.767196	-0.382332
281	LPC(22:6)	2.74	level2			568.34	103.1	POS	C30H50NO7P											0.607034	0.72375	0.645949	0.658911	0.640291	2.49534e-05	0.857773	0.499363	0.996079	0.599694	0.964454	0.757861	-0.399994
282	Linoleoylcarnitine (Car(18:2))	2.74	level2			424.342	86.8	POS	C25H45NO4	HMDB0241541		36816-10-1								0.158651	0.343229	0.508902	0.336927	0.485168	2.49534e-05	0.253129	0.246107	0.98497	0.626963	0.967169	0.730446	-0.453151
283	PC(37:2)	2.74	level2			800.616	65.7	POS	C45H86NO8P											0.523331	0.598765	2.14133	1.08781	2.68166	2.11664	1.1472	1.98183	1.3049	0.2659	0.962514	1.82186	0.865412
284	LPC(18:1)	2.74	level2			522.355	53.1	POS	C26H52NO7P	HMDB0002815		19420-56-5	C03916	Lipids and lipid-like molecules	脂质和类脂分子	Glycerophospholipids	甘油磷脂类	Glycerophosphocholines	甘油磷酸胆碱	1.65949	7.93526	3.47855	4.35777	3.82553	3.18993	6.81123	4.6089	0.538473	0.91356	0.999955	1.05763	0.0808337
285	PC(42:10)	2.74	level2			854.569	32.8	POS	C50H80NO8P											2.38509e-05	0.449437	0.409471	0.286311	0.370956	0.540372	0.526552	0.479293	1.11022	0.277172	0.962514	1.67403	0.743327
286	PC(35:2)	2.73	level2			772.584	66.5	POS	C43H82NO8P											3.50929	4.27042	2.60637	3.46203	2.38091e-05	2.49534e-05	3.56162	1.18722	1.49133	0.150398	0.962514	0.342927	-1.54403
287	PC(40:6)	2.73	level2			834.6	65.7	POS	C48H84NO8P											1.70675	2.5813	2.01377	2.10061	2.48062	2.49534e-05	1.16972	1.21679	1.07339	0.310001	0.962514	0.579254	-0.787732
288	PC(32:1)	2.73	level2			732.553	19.2	POS	C40H78NO8P											2.12483	2.62191	2.40436	2.3837	3.06623	1.38941	1.81774	2.09113	0.884103	0.605827	0.964888	0.877262	-0.188921
289	PC(38:4)	2.73	level2			810.6	65.7	POS	C46H84NO8P											22.9961	21.7572	24.1914	22.9815	26.0791	2.49534e-05	14.786	13.6217	1.0601	0.340644	0.962514	0.592724	-0.754568
290	Arecaidine	2.73	level2			142.086	296.3	POS	C7H11NO2	HMDB0030352		499-04-7	C10128	Alkaloids and derivatives	生物碱和衍生物	Alkaloids and derivatives	生物碱和衍生物	Alkaloids and derivatives	生物碱和衍生物	0.0797674	0.0946851	0.132605	0.102353	0.117404	0.111443	0.0929354	0.107261	0.43695	0.791491	0.992348	1.04795	0.0675761
291	(R)-Aminocarnitine	2.73	level2			161.128	295.6	POS	C7H16N2O2					Organic acids and derivatives	有机酸及其衍生物	Carboxylic acids and derivatives	羧酸及衍生物	Amino acids, peptides, and analogues	氨基酸、肽和类似物	1.39239	1.66251	3.45893	2.17128	2.51108	2.63969	1.46237	2.20438	0.203148	0.966822	0.999955	1.01525	0.0218316
292	Asp-Arg	2.73	level2			290.146	275.2	POS	C10H19N5O5											0.100766	0.107689	0.0322862	0.0802472	0.0364114	0.0145864	0.0598364	0.0369447	1.29566	0.188938	0.962514	0.460386	-1.11908
293	(3R)-3-Hydroxy-L-proline	2.73	level2			132.065	256.1	POS	C5H9NO3					Organic acids and derivatives	有机酸及其衍生物	Carboxylic acids and derivatives	羧酸及衍生物	Amino acids, peptides, and analogues	氨基酸、肽和类似物	0.916867	0.275733	0.958975	0.717192	0.234031	0.654904	0.257429	0.382122	1.12004	0.266728	0.962514	0.532802	-0.908327
294	2-(Aminomethyl)-4-chlorophenol	2.73	level2			156.022	249.2	NEG	C7H8ClNO					Benzenoids	苯环型化合物	Benzene and substituted derivatives	苯和取代衍生物	Phenylmethylamines		0.0404702	0.0308101	0.04724	0.0395068	0.0480072	6.39171e-06	0.0533749	0.0337962	0.955759	0.76214	0.987627	0.855452	-0.22524
295	2-(4-Amino-2-nitroanilino)ethanol	2.73	level2			198.087	242.5	POS	C8H11N3O3					Benzenoids	苯环型化合物	Benzene and substituted derivatives	苯和取代衍生物	Nitrobenzenes		0.0597518	0.116289	0.0850444	0.0870283	0.0671942	0.103476	0.0757147	0.0821283	0.0732929	0.815645	0.996909	0.943697	-0.0836037
296	6-Hydroxytropinone	2.73	level2			156.102	236.1	POS	C8H13NO2					Alkaloids and derivatives	生物碱和衍生物	Tropane alkaloids		Tropane alkaloids		0.0568921	0.112683	0.0516695	0.0737483	0.0513156	0.0816339	0.0687402	0.0672299	0.0929065	0.775972	0.989846	0.911613	-0.133507
297	3,6-Dimethylpyridazin-4-amine	2.73	level2			124.087	223.1	POS	C6H9N3					Organoheterocyclic compounds	有机杂环化合物	Diazines	二氮杂苯	Pyridazines and derivatives		0.796526	0.827732	0.887628	0.837295	0.94871	0.73295	0.722093	0.801251	0.696076	0.669917	0.973674	0.956952	-0.0634818
298	Trimidox	2.73	level2			185.055	219.6	POS	C7H8N2O4	HMDB0259245				Benzenoids	苯环型化合物	Phenols	酚类	Benzenetriols and derivatives	苯三酚及衍生物	0.0787329	0.0684103	0.0686489	0.0719307	2.38091e-05	0.0771098	0.0824613	0.0531983	0.833327	0.555565	0.962514	0.739577	-0.435228
299	Creatine, ethyl ester	2.73	level2			160.108	216.3	POS	C6H13N3O2	HMDB0250523				Organic acids and derivatives	有机酸及其衍生物	Carboxylic acids and derivatives	羧酸及衍生物	Amino acids, peptides, and analogues	氨基酸、肽和类似物	0.0274752	0.0278054	0.0272183	0.0274996	0.0308081	2.49534e-05	0.0381886	0.0230072	0.950306	0.737721	0.984009	0.836638	-0.257325
300	Sarcosine ethyl ester	2.73	level2			118.086	204.8	POS	C5H11NO2					Organic acids and derivatives	有机酸及其衍生物	Carboxylic acids and derivatives	羧酸及衍生物	Amino acids, peptides, and analogues	氨基酸、肽和类似物	0.978468	2.21526e-05	2.35453e-05	0.326171	1.07775	1.10352	1.10711	1.09613	1.52182	0.142038	0.962514	3.36059	1.74871
301	4-Cyclopropyl-1H-imidazol-2-amine	2.73	level2			124.087	203.9	POS	C6H9N3					Organoheterocyclic compounds	有机杂环化合物	Azoles	吡咯类	Imidazoles	咪唑	0.0396788	0.0292328	0.0311662	0.0333593	0.0530565	0.039939	2.34116e-05	0.0310063	0.99736	0.891986	0.999955	0.929466	-0.105526
302	7-Bromo-4H,5H-pyrrolo[1,2-a]quinoxalin-4-one	2.73	level2			262.981	200.1	POS	C11H7BrN2O					Organoheterocyclic compounds	有机杂环化合物	Diazanaphthalenes	二氮杂萘	Benzodiazines	苯并二嗪	0.794243	0.951022	0.597213	0.780826	0.456753	0.945612	0.51411	0.638825	0.87415	0.485874	0.962514	0.81814	-0.28958
303	3-Aminobutanoic acid	2.73	level2			104.07	190.2	POS	C4H9NO2	HMDB0031654		541-48-0		Organic acids and derivatives	有机酸及其衍生物	Carboxylic acids and derivatives	羧酸及衍生物	Amino acids, peptides, and analogues	氨基酸、肽和类似物	0.180226	0.149037	0.210469	0.17991	0.229604	2.49534e-05	0.193453	0.141027	0.985723	0.624522	0.96645	0.783874	-0.351307
304	Picolinamide	2.73	level2			123.055	189	POS	C6H6N2O	HMDB0256533			C01950	Organoheterocyclic compounds	有机杂环化合物	Pyridines and derivatives	吡啶及衍生物	Pyridinecarboxylic acids and derivatives	吡啶羧酸及衍生物	0.0967143	0.276175	0.111778	0.161556	0.103361	0.275342	0.164061	0.180921	0.487169	0.812432	0.996273	1.11987	0.163328
305	1,3-Dimethyluracil	2.73	level2			141.066	189	POS	C6H8N2O2	HMDB0002144		874-14-6		Organoheterocyclic compounds	有机杂环化合物	Diazines	二氮杂苯	Pyrimidines and pyrimidine derivatives	嘧啶类和嘧啶类衍生物	1.0535	2.63308	1.21006	1.63221	1.14749	2.69391	1.55499	1.79879	0.447901	0.819334	0.997607	1.10206	0.140201
306	4-(3-Hydroxyisoxazol-5-yl)piperidine	2.73	level2			169.097	189	POS	C8H12N2O2					Organic nitrogen compounds	有机含氮化合物	Organonitrogen compounds	有机氮化合物	Amines	胺	0.0207815	2.21526e-05	0.0220854	0.0142963	0.0221965	0.0294594	0.0132869	0.0216476	0.929864	0.437942	0.962514	1.51421	0.598561
307	(1,5-Dimethyl-1H-pyrazol-3-yl)methylamine	2.73	level2			126.103	188.5	POS	C6H11N3					Organic nitrogen compounds	有机含氮化合物	Organonitrogen compounds	有机氮化合物	Amines	胺	0.201276	0.59955	0.101521	0.300782	0.323792	0.382469	0.347603	0.351288	0.85394	0.772131	0.988912	1.16791	0.223935
308	2-Aminopyridine	2.73	level2			95.0603	187.9	POS	C5H6N2	HMDB0245026				Organoheterocyclic compounds	有机杂环化合物	Pyridines and derivatives	吡啶及衍生物	Aminopyridines and derivatives	氨基吡啶及衍生物	0.0396336	0.0552127	0.0459348	0.046927	0.0430514	0.0494948	0.0413584	0.0446349	0.365288	0.679803	0.974969	0.951155	-0.0722481
309	Cyclopropanesulfonamide	2.73	level2			122.027	174.2	POS	C3H7NO2S					Organic acids and derivatives	有机酸及其衍生物	Organic sulfonic acids and derivatives	有机磺酸及衍生物	Organosulfonic acids and derivatives	有机磺酸及衍生物	0.0213071	0.00540098	0.168126	0.0649447	0.190295	0.0664524	0.0589432	0.10523	1.06813	0.580368	0.962912	1.6203	0.696265
310	4',5,7-Trihydroxy 3,3',6,8-tetramethoxyflavone	2.73	level2			391.102	172.2	POS	C19H18O9					Phenylpropanoids and polyketides	苯丙素类和聚酮类	Flavonoids	黄酮类	O-methylated flavonoids		0.118638	0.133595	0.123562	0.125265	0.138245	0.113101	0.142536	0.131294	0.59266	0.585586	0.962912	1.04813	0.0678158
311	2-Cyano-L-phenylalanine	2.73	level2			191.081	170.9	POS	C10H10N2O2					Organic acids and derivatives	有机酸及其衍生物	Carboxylic acids and derivatives	羧酸及衍生物	Amino acids, peptides, and analogues	氨基酸、肽和类似物	0.0450737	0.0931572	0.00119497	0.0464753	0.0217652	0.0524526	0.158458	0.0775585	0.866556	0.561784	0.962514	1.66881	0.738821
312	Imazethapyr	2.73	level2			290.15	168.5	POS	C15H19N3O3	HMDB0253406			C18865	Organic acids and derivatives	有机酸及其衍生物	Carboxylic acids and derivatives	羧酸及衍生物	Amino acids, peptides, and analogues	氨基酸、肽和类似物	0.0406549	0.354301	0.0729696	0.155975	0.00971943	0.0245784	0.470991	0.16843	0.453581	0.948494	0.999955	1.07985	0.110829
313	Arsenobetaine	2.73	level2			179.005	167	POS	C5H11AsO2	HMDB0033206		64436-13-1	C19331							0.0914521	2.21526e-05	0.112798	0.0680908	0.115192	0.113741	0.108566	0.1125	0.983596	0.327702	0.962514	1.6522	0.724389
314	7H-[1,2,4]Triazolo[4,3-b][1,2,4]triazole-3,7-diamine	2.73	level2			140.068	161.1	POS	C3H5N7					Organoheterocyclic compounds	有机杂环化合物	Azoles	吡咯类	Triazoles		2.80501	2.77962	3.4052	2.99661	3.29062	3.21084	2.92346	3.14164	0.685163	0.567144	0.962514	1.0484	0.0681867
315	3-Amino-3,5-dihydro-4H-pyrimido[5,4-b]indol-4-one	2.73	level2			201.077	160.7	POS	C10H8N4O					Organoheterocyclic compounds	有机杂环化合物	Pyrrolopyrimidines		Pyrrolopyrimidines		0.114046	0.0870556	0.1396	0.113567	0.128643	0.113884	0.116413	0.119647	0.484897	0.720634	0.981898	1.05353	0.0752381
316	7-Amino-4-methylcoumarin	2.73	level2			176.07	157.3	POS	C10H9NO2	HMDB0247230			C01386	Phenylpropanoids and polyketides	苯丙素类和聚酮类	Coumarins and derivatives	香豆素类及其衍生物	Coumarins and derivatives	香豆素类及其衍生物	0.0235709	0.124922	0.0373851	0.0619592	0.0644298	0.0248776	0.0865112	0.0586062	0.19183	0.931217	0.999955	0.945883	-0.0802656
317	3-Methyl-3,4-dihydro-1H-1,4-benzodiazepine-2,5-dione	2.73	level2			191.081	156	POS	C10H10N2O2					Organoheterocyclic compounds	有机杂环化合物	Benzodiazepines		1,4-benzodiazepines		0.0926411	0.456804	0.0199155	0.189787	0.0460897	0.0896366	0.307005	0.147577	0.218187	0.801841	0.994243	0.777593	-0.362913
318	2-Methoxy-4-methyl-5-nitropyridine	2.73	level2			169.061	155.4	POS	C7H8N2O3					Organic 1,3-dipolar compounds	有机1,3-偶极化合物	Allyl-type 1,3-dipolar organic compounds		Organic nitro compounds		0.142901	0.126979	0.191366	0.153749	0.197061	0.0423518	0.137862	0.125758	0.853989	0.598779	0.964389	0.817947	-0.289921
319	Dimetridazole	2.73	level2			142.061	144.1	POS	C5H7N3O2	HMDB0251409				Organoheterocyclic compounds	有机杂环化合物	Azoles	吡咯类	Imidazoles	咪唑	5.18483	4.64691	5.65265	5.16146	5.51479	5.00858	4.85016	5.12451	0.181538	0.921666	0.999955	0.992841	-0.0103658
320	5,6-Diamino-1H-benzimidazol-2-ol	2.73	level2			165.077	144.1	POS	C7H8N4O					Organoheterocyclic compounds	有机杂环化合物	Benzimidazoles		Benzimidazoles		0.180824	0.156777	0.199344	0.178982	0.194371	0.178357	0.168242	0.180323	0.0559425	0.930636	0.999955	1.0075	0.0107743
321	2-(1-Piperazinyl)acetamide	2.73	level2			144.113	142.3	POS	C6H13N3O					Organic acids and derivatives	有机酸及其衍生物	Carboxylic acids and derivatives	羧酸及衍生物	Amino acids, peptides, and analogues	氨基酸、肽和类似物	0.0171057	0.0262427	0.0198679	0.0210721	0.0160875	2.49534e-05	0.0424664	0.0195263	0.920424	0.908739	0.999955	0.926643	-0.109914
322	1-Allyl-6-hydroxy-2,4(1H,3H)-pyrimidinedione	2.73	level2			169.061	140.6	POS	C7H8N2O3					Organoheterocyclic compounds	有机杂环化合物	Diazines	二氮杂苯	Pyrimidines and pyrimidine derivatives	嘧啶类和嘧啶类衍生物	0.3498	0.341867	0.686047	0.459238	0.731406	0.386318	0.279969	0.465897	0.128741	0.971837	0.999955	1.0145	0.0207702
323	5-Nitro-2-(1-piperidinyl)benzoic acid	2.73	level2			251.102	135.3	POS	C12H14N2O4					Organoheterocyclic compounds	有机杂环化合物	Piperidines	哌啶	Phenylpiperidines		0.0096549	0.0120161	0.0115941	0.0110884	0.0133726	2.49534e-05	0.0112202	0.0082059	0.988121	0.530311	0.962514	0.740046	-0.434313
324	8-Methoxy-4-methyl-2(1H)-quinolinone	2.73	level2			190.086	130.1	POS	C11H11NO2					Organoheterocyclic compounds	有机杂环化合物	Quinolines and derivatives	喹啉及衍生物	Quinolones and derivatives	喹诺酮及衍生物	0.154504	0.854226	0.0423336	0.350355	0.0367735	0.126107	0.553027	0.238636	0.141071	0.72834	0.982584	0.681126	-0.554006
325	4(1H)-Quinolinone, 7-chloro-2-methyl-	2.73	level2			194.037	128.6	POS	C10H8ClNO					Organoheterocyclic compounds	有机杂环化合物	Quinolines and derivatives	喹啉及衍生物	Quinolones and derivatives	喹诺酮及衍生物	0.0330062	0.176623	0.00176719	0.0704656	0.00663701	0.0184612	0.141852	0.0556499	0.186073	0.840604	0.998888	0.789746	-0.340539
326	4-Hydrazinylpyridin-2(1H)-one	2.73	level2			126.066	127	POS	C5H7N3O					Organoheterocyclic compounds	有机杂环化合物	Pyridines and derivatives	吡啶及衍生物	Hydropyridines		0.35625	0.286879	0.32301	0.322046	0.346582	0.338509	0.396279	0.360457	1.29674	0.227535	0.962514	1.11927	0.162557
327	Glycerophospho-N-oleoylethanolamine	2.73	level2			480.308	120.1	POS	C23H46NO7P					Lipids and lipid-like molecules	脂质和类脂分子	Glycerophospholipids	甘油磷脂类	Glycerophosphoethanolamines	磷脂酰乙醇胺	2.61083	3.73168	1.70925	2.68392	1.64691	1.04254	3.61769	2.10238	0.749263	0.582236	0.962912	0.783325	-0.352317
328	5-Methyl-2'-deoxycytidine	2.73	level2			242.113	103.4	POS	C10H15N3O4					Nucleosides, nucleotides, and analogues	核苷、核苷酸和类似物	Pyrimidine nucleosides	嘧啶核苷类	Pyrimidine 2'-deoxyribonucleosides		0.946454	1.04458	0.42492	0.805319	0.433699	0.376064	0.477061	0.428941	1.56615	0.186987	0.962514	0.532636	-0.908779
329	FA 18:2+2O	2.73	level2			311.222	103.3	NEG	C18H32O4	HMDB0242602				Lipids and lipid-like molecules	脂质和类脂分子	Fatty Acyls	脂肪酰类	Lineolic acids and derivatives	亚油酸及衍生物	0.0406082	6.18187e-06	0.017092	0.0192355	0.0161494	0.0213611	0.0382755	0.025262	0.920975	0.679112	0.974969	1.3133	0.393202
330	3-Cyclohexyl-1,1-dimethylurea	2.73	level2			171.149	70.4	POS	C9H18N2O					Organic acids and derivatives	有机酸及其衍生物	Organic carbonic acids and derivatives		Ureas		1.20287	0.580509	0.956535	0.913304	0.769483	1.19407	0.98034	0.981297	0.431975	0.771267	0.988911	1.07445	0.103594
331	Nootkatone	2.73	level2			219.174	68.3	POS	C15H22O					Lipids and lipid-like molecules	脂质和类脂分子	Prenol lipids	异戊烯醇脂类	Sesquiterpenoids		2.38509e-05	0.915956	0.77303	0.563003	0.686167	0.280935	0.533413	0.500172	0.937683	0.848341	0.999316	0.888399	-0.17072
332	2-(4-Pyridinyl)ethanol	2.73	level2			124.076	65.2	POS	C7H9NO					Organoheterocyclic compounds	有机杂环化合物	Pyridines and derivatives	吡啶及衍生物	Pyridines and derivatives	吡啶及衍生物	0.0211353	0.0194616	0.0278875	0.0228281	0.0220296	0.0253646	0.0193519	0.0222487	0.164106	0.861162	0.999847	0.974617	-0.0370922
333	1,4-D-Xylobiose	2.73	level2			281.088	54.8	NEG	C10H18O9					Organic oxygen compounds	有机含氧化合物	Organooxygen compounds	有机氧化合物	Carbohydrates and carbohydrate conjugates	碳水化合物和碳水化合物结合物	0.0433083	0.032709	0.0583912	0.0448028	0.0558306	0.0748774	0.0355343	0.0554141	0.702866	0.478392	0.962514	1.23684	0.306663
334	Tetraethylammonium cation	2.73	level2			130.159	51.9	POS	C8H20N					Organic nitrogen compounds	有机含氮化合物	Organonitrogen compounds	有机氮化合物	Quaternary ammonium salts	季铵盐	0.258863	0.24654	0.380104	0.295169	0.389051	0.452464	0.385552	0.409022	1.72578	0.076012	0.962514	1.38572	0.470638
335	2-Dimethylamino-6-hydroxypurine	2.73	level2			180.088	50.6	POS	C7H9N5O	HMDB0341362				Organoheterocyclic compounds	有机杂环化合物	Imidazopyrimidines	咪唑并嘧啶	Purines and purine derivatives	嘌呤和嘌呤衍生物	0.350521	0.286574	0.437427	0.358174	0.453135	0.458611	0.413176	0.441641	1.45757	0.143801	0.962514	1.23303	0.302213
336	Dolasetron	2.73	level2			325.154	48.6	POS	C19H20N2O3											0.0413196	0.24779	0.00276265	0.0972909	0.0249328	0.11714	0.302524	0.148199	0.859289	0.671873	0.974285	1.52326	0.607159
337	2-Methyl-5-phenyl-1,3-thiazol-4-ol	2.73	level2			192.048	47.8	POS	C10H9NOS					Organoheterocyclic compounds	有机杂环化合物	Azoles	吡咯类	Thiazoles		0.409355	1.74602	0.0314151	0.72893	0.34639	0.394928	2.75525	1.16552	0.775113	0.669696	0.973668	1.59895	0.677126
338	2-(Ethylthio)-5-methoxy-1H-benzimidazole	2.73	level2			209.074	47.8	POS	C10H12N2OS					Organoheterocyclic compounds	有机杂环化合物	Benzimidazoles		Benzimidazoles		0.191996	0.8323	0.00801416	0.344103	0.153553	0.189558	1.33873	0.560615	0.810346	0.66404	0.972304	1.62921	0.704169
339	4-(Dimethylamino)phenylalanine	2.73	level2			209.128	47.7	POS	C11H16N2O2					Organic acids and derivatives	有机酸及其衍生物	Carboxylic acids and derivatives	羧酸及衍生物	Amino acids, peptides, and analogues	氨基酸、肽和类似物	0.146581	0.11122	0.190302	0.149368	0.1833	0.263419	0.0937474	0.180155	0.344676	0.599596	0.964427	1.20612	0.270374
340	3-(4-Bromoanilino)-5,5-dimethyl-2-cyclohexen-1-one	2.73	level2			294.048	47.4	POS	C14H16BrNO					Benzenoids	苯环型化合物	Benzene and substituted derivatives	苯和取代衍生物	Aniline and substituted anilines		0.0884795	0.0417398	0.204851	0.11169	0.204991	0.146994	0.222061	0.191349	1.35256	0.2111	0.962514	1.71321	0.776705
341	Tributylamine	2.73	level2			186.221	45.9	POS	C12H27N	HMDB0259165				Organic nitrogen compounds	有机含氮化合物	Organonitrogen compounds	有机氮化合物	Amines	胺	1.19117	1.02057	1.08389	1.09855	1.11864	2.49534e-05	1.06641	0.72836	1.03104	0.416953	0.962514	0.663022	-0.592871
342	1-Hexadecyl-2-(9Z-octadecenoyl)-sn-glycero-3-phosphocholine	2.73	level2			746.605	36.3	POS	C42H84NO7P					Lipids and lipid-like molecules	脂质和类脂分子	Glycerophospholipids	甘油磷脂类	Glycerophosphocholines	甘油磷酸胆碱	2.83864	2.22434	2.72109	2.59469	2.38091e-05	2.40945	2.34116e-05	0.803165	1.55952	0.0956192	0.962514	0.309542	-1.69179
343	1-Hexadecyl-2-(8Z,11Z,14Z-eicosatrienoyl)-sn-glycero-3-phosphocholine	2.73	level2			770.605	34.5	POS	C44H84NO7P					Lipids and lipid-like molecules	脂质和类脂分子	Glycerophospholipids	甘油磷脂类	Glycerophosphocholines	甘油磷酸胆碱	3.2254	1.86616	3.03074	2.70743	2.77523	2.05366	1.5064	2.11176	1.14157	0.348436	0.962514	0.779986	-0.358479
344	Chrysogine	2.73	level2			191.081	23.9	POS	C10H10N2O2					Organoheterocyclic compounds	有机杂环化合物	Diazanaphthalenes	二氮杂萘	Benzodiazines	苯并二嗪	0.331308	0.381013	2.35453e-05	0.237448	0.347316	0.39903	0.280435	0.34226	0.940885	0.44694	0.962514	1.44141	0.527479
345	1-Palmitoyl-2-docosahexaenoyl-sn-glycero-3-phosphocholine	2.73	level2			806.568	18.9	POS	C46H80NO8P	HMDB0007991				Lipids and lipid-like molecules	脂质和类脂分子	Glycerophospholipids	甘油磷脂类	Glycerophosphocholines	甘油磷酸胆碱	9.81288	10.4818	11.0322	10.4423	10.6684	2.49534e-05	12.179	7.6158	1.01063	0.538053	0.962514	0.729323	-0.45537
346	4'-Methoxy-.alpha.-pyrrolidinopropiophenone	2.73	level2			234.149	13.3	POS	C14H19NO2					Organic oxygen compounds	有机含氧化合物	Organooxygen compounds	有机氧化合物	Carbonyl compounds	羰基化合物	0.0879315	0.0450747	0.0946549	0.075887	0.112859	0.0236846	0.0442963	0.0602798	0.900018	0.642219	0.969757	0.794336	-0.332178
347	Cyclo(leucylprolyl)	2.73	level2			211.144	13	POS	C11H18N2O2					Organic acids and derivatives	有机酸及其衍生物	Carboxylic acids and derivatives	羧酸及衍生物	Amino acids, peptides, and analogues	氨基酸、肽和类似物	0.0175796	0.0169885	0.0145034	0.0163572	2.38091e-05	0.0341271	0.00825657	0.0141358	0.850388	0.849202	0.999406	0.864198	-0.210566
348	N-Methylvaline	2.73	level2			132.102	188	POS	C6H13NO2	HMDB0061716				Organic acids and derivatives	有机酸及其衍生物	Carboxylic acids and derivatives	羧酸及衍生物	Amino acids, peptides, and analogues	氨基酸、肽和类似物	0.845687	2.21526e-05	1.06574	0.637149	0.861937	1.03861	0.85774	0.91943	0.947467	0.440872	0.962514	1.44304	0.52911
349	N-Carboxyethyl-r-aminobutyric_acid	2.73	level2			176.091	160.3	POS	C7H13NO4	HMDB0002201		908055		Organic acids and derivatives	有机酸及其衍生物	Carboxylic acids and derivatives	羧酸及衍生物	Amino acids, peptides, and analogues	氨基酸、肽和类似物	0.0519462	2.21526e-05	0.0953059	0.0490914	0.0939238	0.0764463	0.064041	0.078137	0.978469	0.371367	0.962514	1.59166	0.670536
350	2-Hydroxyisobutyric acid	2.73	level2			103.04	159.6	NEG	C4H8O3	HMDB0000729		594-61-6		Organic acids and derivatives	有机酸及其衍生物	Hydroxy acids and derivatives	羟基酸及衍生物	Alpha hydroxy acids and derivatives	Alpha-羟基酸及衍生物	0.0922161	6.18187e-06	0.0969847	0.063069	0.105169	0.108218	0.0862403	0.0998758	0.964579	0.318107	0.962514	1.5836	0.663204
351	1,5-Naphthalenediamine	2.73	level2			159.091	157.3	POS	C10H10N2	HMDB0244231			C19463	Benzenoids	苯环型化合物	Naphthalenes	萘类	Naphthalenes	萘类	0.153637	2.21526e-05	0.153891	0.102517	0.170124	0.161186	0.172742	0.168017	0.977904	0.329342	0.962514	1.63893	0.712751
352	Phenacetin	2.73	level2			180.102	141.9	POS	C10H13NO2	HMDB0256387			C07591	Benzenoids	苯环型化合物	Benzene and substituted derivatives	苯和取代衍生物	Anilides		0.0650552	0.168235	0.0676545	0.100315	0.0522066	2.49534e-05	0.0587741	0.0370019	1.15784	0.17736	0.962514	0.368857	-1.43887
353	Phenylethylmalonamide	2.73	level2			207.113	135.2	POS	C11H14N2O2	HMDB0245113			C07499	Benzenoids	苯环型化合物	Benzene and substituted derivatives	苯和取代衍生物	Phenylacetamides		0.148037	0.559717	0.0233936	0.243716	0.0552236	0.0568666	0.176984	0.0963582	0.42036	0.427371	0.962514	0.395371	-1.33872
354	Dulcin	2.73	level2			181.097	46.5	POS	C9H12N2O2	HMDB0032565		150-69-6	C19415	Benzenoids	苯环型化合物	Benzene and substituted derivatives	苯和取代衍生物	N-phenylureas		0.416126	0.337971	0.172959	0.309019	0.168383	0.126637	0.392828	0.229283	0.826033	0.506488	0.962514	0.741971	-0.430566
355	Gabapentin	2.73	level2			172.133	21.9	POS	C9H17NO2	HMDB0005015		60142-96-3		Organic acids and derivatives	有机酸及其衍生物	Carboxylic acids and derivatives	羧酸及衍生物	Amino acids, peptides, and analogues	氨基酸、肽和类似物	2.38509e-05	0.112076	0.329554	0.147218	0.412245	0.468851	0.593867	0.491654	1.30053	0.0357438	0.962514	3.33964	1.73969
356	LPC(17:1)	2.73	level2			508.34	108.9	POS	C25H50NO7P		1-(9Z-十七碳烯酰基)-甘油-3-磷酸胆碱			Lipids and lipid-like molecules	脂质和类脂分子	Glycerophospholipids	甘油磷脂类	Glycerophosphocholines	甘油磷酸胆碱	2.02721	0.803369	0.370622	1.06707	2.19328	0.332924	0.987899	1.17137	0.0380766	0.894274	0.999955	1.09775	0.134543
357	PC(33:2)	2.73	level2			744.553	66.7	POS	C41H78NO8P											0.217651	2.21526e-05	0.148527	0.122067	0.166582	0.14559	0.0806206	0.130931	0.838943	0.904284	0.999955	1.07262	0.101134
358	PC(39:4)	2.73	level2			824.616	19.1	POS	C47H86NO8P											1.42475	1.19204	2.32702	1.64794	2.44736	1.72521	1.1386	1.77039	0.149682	0.823029	0.997626	1.07431	0.103406
359	PC(38:5)	2.72	level2			808.583	19.2	POS	C46H82NO8P											16.106	23.4079	21.0016	20.1718	19.868	20.7346	2.34116e-05	13.5342	1.09234	0.403039	0.962514	0.670946	-0.575731
360	N1,N2-Bis(2-hydroxyethyl)ethanediamide	2.72	level2			177.087	302	POS	C6H12N2O4					Organic acids and derivatives	有机酸及其衍生物	Carboxylic acids and derivatives	羧酸及衍生物	Amino acids, peptides, and analogues	氨基酸、肽和类似物	11.5256	2.96408	9.05687	7.84886	17.1681	4.47233	14.5965	12.079	0.680324	0.413122	0.962514	1.53895	0.621943
361	Propamocarb	2.72	level2			189.16	291.8	POS	C9H20N2O2	HMDB0341191			C18885	Organic acids and derivatives	有机酸及其衍生物	Carboxylic acids and derivatives	羧酸及衍生物	Amino acids, peptides, and analogues	氨基酸、肽和类似物	1.99612	3.19945	3.71575	2.97044	3.44338	4.8096	2.20558	3.48619	0.546252	0.600529	0.964617	1.17363	0.230973
362	Oxo(propan-2-ylamino)acetic acid	2.72	level2			132.065	280.7	POS	C5H9NO3					Organic acids and derivatives	有机酸及其衍生物	Carboxylic acids and derivatives	羧酸及衍生物	Amino acids, peptides, and analogues	氨基酸、肽和类似物	0.627454	0.34015	0.682825	0.550143	0.627232	0.717486	0.624616	0.656445	0.950035	0.390551	0.962514	1.19323	0.254867
363	3-Methyl-7-propylxanthine	2.72	level2			209.103	242.5	POS	C9H12N4O2					Organoheterocyclic compounds	有机杂环化合物	Imidazopyrimidines	咪唑并嘧啶	Purines and purine derivatives	嘌呤和嘌呤衍生物	0.0514243	0.0862398	0.0655579	0.0677407	0.0546174	0.0840807	0.0618352	0.0668444	0.0669348	0.950057	0.999955	0.986769	-0.0192151
364	2-(4-(Methylamino)phenyl)benzo[d]thiazol-6-ol	2.72	level2			257.074	235.7	POS	C14H12N2OS	HMDB0244929				Organoheterocyclic compounds	有机杂环化合物	Benzothiazoles		Benzothiazoles		0.175036	0.125545	0.171408	0.157329	0.238538	0.17108	0.23525	0.214956	1.54647	0.100842	0.962514	1.36628	0.450256
365	p-Phenylenediamine	2.72	level2			109.076	222.5	POS	C6H8N2	HMDB0256055			C19499	Benzenoids	苯环型化合物	Benzene and substituted derivatives	苯和取代衍生物	Aniline and substituted anilines		0.421604	0.394213	0.434492	0.41677	0.346823	0.137141	0.292092	0.258686	1.58864	0.0686722	0.962514	0.620692	-0.688051
366	N,N-Dimethyl-L-valine	2.72	level2			146.118	221.1	POS	C7H15NO2					Organic acids and derivatives	有机酸及其衍生物	Carboxylic acids and derivatives	羧酸及衍生物	Amino acids, peptides, and analogues	氨基酸、肽和类似物	2.43474	2.1329	2.83376	2.46714	2.88472	2.45535	1.581	2.30702	0.620024	0.73087	0.983045	0.935102	-0.0968045
367	1,3-Oxazinan-2-imine	2.72	level2			101.071	218.7	POS	C4H8N2O					Organic acids and derivatives	有机酸及其衍生物	Carboximidic acids and derivatives		Carboximidic acids		0.942654	0.875577	1.02657	0.948266	1.01056	2.49534e-05	1.01019	0.673591	1.0139	0.501143	0.962514	0.71034	-0.493419
368	5-Propyl-1H-1,2,3,4-tetrazole	2.72	level2			113.082	214.4	POS	C4H8N4					Organoheterocyclic compounds	有机杂环化合物	Azoles	吡咯类	Tetrazoles		0.22542	0.185597	0.217434	0.209484	2.38091e-05	0.220942	0.157564	0.126176	0.897174	0.280348	0.962514	0.602321	-0.731395
369	1,2-Diethylhydrazine	2.72	level2			89.1073	213.4	POS	C4H12N2					Organic nitrogen compounds	有机含氮化合物	Organonitrogen compounds	有机氮化合物	Hydrazines and derivatives		0.66143	0.776964	0.78362	0.740671	0.884047	0.744218	0.909496	0.84592	1.4237	0.180239	0.962514	1.1421	0.191688
370	Phe-Glu	2.72	level2			295.129	208	POS	C14H18N2O5	HMDB0028994		3617-45-6		Organic acids and derivatives	有机酸及其衍生物	Carboxylic acids and derivatives	羧酸及衍生物	Amino acids, peptides, and analogues	氨基酸、肽和类似物	0.0407028	0.0485612	0.0641889	0.051151	0.0646538	0.0600673	0.047198	0.0573064	0.769665	0.516323	0.962514	1.12034	0.163933
371	L-Norvaline	2.72	level2			118.086	186.7	POS	C5H11NO2	HMDB0013716		760-78-1	C01799	Organic acids and derivatives	有机酸及其衍生物	Carboxylic acids and derivatives	羧酸及衍生物	Amino acids, peptides, and analogues	氨基酸、肽和类似物	8.64506	2.21526e-05	17.1364	8.59382	16.0828	13.2214	16.0551	15.1197	0.994366	0.264835	0.962514	1.75937	0.815063
372	N-(1,1-Dioxidotetrahydro-3-thienyl)-N-phenylamine	2.72	level2			212.074	166.3	POS	C10H13NO2S					Organic nitrogen compounds	有机含氮化合物	Organonitrogen compounds	有机氮化合物	Amines	胺	0.0525039	0.0557086	0.0696141	0.0592755	0.0717521	0.0795383	2.34116e-05	0.050438	1.02028	0.749616	0.985179	0.850907	-0.232926
373	1-Methylhydantoin	2.72	level2			115.05	156	POS	C4H6N2O2	HMDB0003646		616-04-6	C02565	Organoheterocyclic compounds	有机杂环化合物	Azolines	氮杂环戊烯	Imidazolines	咪唑啉	0.116579	0.119248	0.122139	0.119322	2.38091e-05	2.49534e-05	0.120391	0.0401466	1.4949	0.186992	0.962514	0.336456	-1.57151
374	N-(4-Hydroxyphenyl)propanamide	2.72	level2			166.086	155.5	POS	C9H11NO2					Benzenoids	苯环型化合物	Benzene and substituted derivatives	苯和取代衍生物	Anilides		7.9072	10.0032	10.0677	9.32605	10.2527	9.76039	8.02502	9.34604	0.00900681	0.9847	0.999955	1.00214	0.00308914
375	5-(4-Fluorobenzyl)-1,3,4-thiadiazol-2-amine	2.72	level2			210.05	155.1	POS	C9H8FN3S					Benzenoids	苯环型化合物	Benzene and substituted derivatives	苯和取代衍生物	Halobenzenes		0.052916	0.0450347	0.0564024	0.051451	0.0669446	0.060822	0.0509994	0.0595886	1.17249	0.228818	0.962514	1.15816	0.211837
376	4-(Trifluoromethyl)piperidine	2.72	level2			154.083	152.1	POS	C6H10F3N					Organoheterocyclic compounds	有机杂环化合物	Piperidines	哌啶	Piperidines	哌啶	0.00892558	0.010468	0.00585795	0.00841717	0.00621691	2.49534e-05	0.00710946	0.00445044	1.10929	0.202816	0.962514	0.528734	-0.919386
377	Arg-Gly-Asp	2.72	level2			347.168	130.5	POS	C12H22N6O6	HMDB0248572				Organic acids and derivatives	有机酸及其衍生物	Carboxylic acids and derivatives	羧酸及衍生物	Amino acids, peptides, and analogues	氨基酸、肽和类似物	0.197884	0.140059	0.198432	0.178792	0.199739	0.21008	0.254971	0.221597	1.42375	0.171628	0.962514	1.23941	0.309656
378	Octenoyl-carnitine	2.72	level2			286.201	128.5	POS	C15H27NO4	HMDB0013324				Lipids and lipid-like molecules	脂质和类脂分子	Fatty Acyls	脂肪酰类	Fatty acid esters	脂肪酸酯	2.38509e-05	0.0419153	0.073976	0.0386384	0.0749461	2.49534e-05	0.0656758	0.0468823	0.0911638	0.808543	0.99509	1.21336	0.279007
379	Methyl 6-hydroxy-1H-indole-3-carboxylate	2.72	level2			190.051	124.5	NEG	C10H9NO3					Organoheterocyclic compounds	有机杂环化合物	Indoles and derivatives	吲哚和衍生物	Indolecarboxylic acids and derivatives		0.0467958	0.0417965	0.0450862	0.0445595	0.041721	0.0409086	6.43614e-06	0.0275453	1.11851	0.341835	0.962514	0.61817	-0.693924
380	Isocytosine	2.72	level2			112.05	110	POS	C4H5N3O					Organoheterocyclic compounds	有机杂环化合物	Diazines	二氮杂苯	Pyrimidines and pyrimidine derivatives	嘧啶类和嘧啶类衍生物	4.12593	2.35717	3.90506	3.46272	3.99629	3.38863	4.08498	3.8233	0.650803	0.579	0.962912	1.10413	0.142912
381	5-Methoxy-4-methyl-2,4-dihydro-3H-1,2,4-triazol-3-one	2.72	level2			130.061	108	POS	C4H7N3O2					Organic oxygen compounds	有机含氧化合物	Organooxygen compounds	有机氧化合物	Ethers	醚	2.38509e-05	0.483107	0.573096	0.352076	0.557197	0.562081	0.518737	0.546005	1.09081	0.389566	0.962514	1.55082	0.633029
382	N-Methyltrimethylacetamide	2.72	level2			116.107	89.7	POS	C6H13NO					Organic acids and derivatives	有机酸及其衍生物	Carboxylic acids and derivatives	羧酸及衍生物	Carboxylic acid derivatives	羧酸衍生物	0.0760648	0.112256	0.0749065	0.0877424	0.0749253	0.128188	0.0749431	0.0926854	0.251666	0.830015	0.998032	1.05634	0.0790686
383	N-Nervonoyl-D-erythro-sphingosylphosphorylcholine	2.72	level2			813.683	66.5	POS	C47H93N2O6P	HMDB0012107		94359-13-4	C00550	Lipids and lipid-like molecules	脂质和类脂分子	Sphingolipids	鞘脂类	Phosphosphingolipids	鞘磷脂	1.76255	2.37307	0.92279	1.68614	1.01669	0.393964	0.522057	0.644236	1.79519	0.0868061	0.962514	0.382079	-1.38806
384	1-(1Z-Octadecenyl)-2-(4Z,7Z,10Z,13Z,16Z,19Z-docosahexaenoyl)-sn-glycero-3-phosphocholine	2.72	level2			818.605	32.7	POS	C48H84NO7P	HMDB0011262				Lipids and lipid-like molecules	脂质和类脂分子	Glycerophospholipids	甘油磷脂类	Glycerophosphocholines	甘油磷酸胆碱	2.38509e-05	0.673282	0.610529	0.427945	0.651023	0.665592	2.34116e-05	0.43888	0.00927444	0.973298	0.999955	1.02555	0.0363989
385	3-Piperidone	2.72	level2			100.076	25.8	POS	C5H9NO					Organoheterocyclic compounds	有机杂环化合物	Piperidines	哌啶	Piperidinones	哌啶酮	1.92347	6.79256	18.9467	9.22093	20.495	6.31114	29.5979	18.8013	1.15648	0.32061	0.962514	2.03899	1.02785
386	Palmitoyleicosapentaenoyl phosphatidylcholine	2.72	level2			780.552	18.9	POS	C44H78NO8P					Lipids and lipid-like molecules	脂质和类脂分子	Glycerophospholipids	甘油磷脂类	Glycerophosphocholines	甘油磷酸胆碱	4.02213	4.27923	4.14798	4.14978	3.78124	3.29949	4.58523	3.88865	0.723758	0.532092	0.962514	0.937075	-0.093764
387	Finasteridecarboxylic acid	2.72	level2			403.259	18	POS	C23H34N2O4					Lipids and lipid-like molecules	脂质和类脂分子	Steroids and steroid derivatives	甾类和甾类衍生物	Androstane steroids		0.611193	1.05332	0.523071	0.729194	0.151092	0.177479	0.620187	0.316252	1.50094	0.1387	0.962514	0.433702	-1.20523
388	N-Hexadecanoylpyrrolidine	2.72	level2			310.31	16.6	POS	C20H39NO	HMDB0032740		70974-48-0		Organoheterocyclic compounds	有机杂环化合物	Pyrrolidines	吡咯烷	N-acylpyrrolidines		2.33762	2.70223	2.80287	2.61424	3.046	3.33727	2.1994	2.86089	0.562775	0.540848	0.962514	1.09435	0.130071
389	Decamethylcyclopentasiloxane	2.72	level2			371.101	15.8	POS	C10H30O5Si5											1.04095	0.604378	0.823473	0.822933	0.674379	0.817522	0.816351	0.769417	0.322493	0.711417	0.980945	0.93497	-0.0970077
390	2-(4-Chlorophenyl)-2,3-dihydro-1H-perimidine	2.72	level2			281.084	14.5	POS	C17H13ClN2					Benzenoids	苯环型化合物	Naphthalenes	萘类	Naphthalenes	萘类	0.667794	0.418925	0.0455039	0.377408	0.0399252	0.0167417	0.913538	0.323402	0.68921	0.883571	0.999955	0.856903	-0.222797
391	4-Bromo-2-(trifluoromethoxy)phenol	2.72	level2			254.928	14.2	NEG	C7H4BrF3O2					Benzenoids	苯环型化合物	Phenol ethers	酚醚类	Phenol ethers		0.449064	0.657724	0.425021	0.510603	0.422397	0.516889	1.19274	0.710675	0.866186	0.474243	0.962514	1.39184	0.476989
392	Phenol, 3-[[6-(3-aminophenyl)-7H-pyrrolo[2,3-d]pyrimidin-4-yl]oxy]-	2.72	level2			317.105	13.1	NEG	C18H14N4O2	HMDB0259330				Organoheterocyclic compounds	有机杂环化合物	Pyrroles	吡咯	Substituted pyrroles		6.87516e-06	0.452443	0.52916	0.327203	0.50157	0.318817	0.285782	0.368723	1.00824	0.827209	0.997949	1.12689	0.17235
393	Acamprosate	2.72	level2			180.033	183.7	NEG	C5H11NO4S	HMDB0014797		77337-76-9		Organic acids and derivatives	有机酸及其衍生物	Organic sulfonic acids and derivatives	有机磺酸及衍生物	Organosulfonic acids and derivatives	有机磺酸及衍生物	0.00260641	0.00379053	0.00519045	0.00386247	0.00514318	0.00275826	0.0029195	0.00360698	0.320704	0.823393	0.997626	0.933855	-0.0987299
394	Aviprin	2.72	level2			305.099	144.9	POS	C16H16O6	HMDB0256020				Phenylpropanoids and polyketides	苯丙素类和聚酮类	Coumarins and derivatives	香豆素类及其衍生物	Furanocoumarins		0.170845	0.135744	0.181839	0.162809	0.186147	0.17375	0.204745	0.188214	1.33365	0.199848	0.962514	1.15604	0.209194
395	1-hexylamine	2.72	level2			102.127	45	POS	C6H15N	HMDB0032323		111-26-2	C08306	Organic nitrogen compounds	有机含氮化合物	Organonitrogen compounds	有机氮化合物	Amines	胺	2.03351	1.21066	1.48145	1.5752	1.56869	1.44493	1.41573	1.47645	0.422742	0.709297	0.980296	0.937307	-0.0934068
396	Isovaleramide	2.72	level2			102.091	207.7	POS	C5H11NO		异戊酰胺	541-46-8	D04637	Lipids and lipid-like molecules	脂质和类脂分子	Fatty Acyls	脂肪酰类	Fatty amides	脂肪酸酰胺	0.0853713	0.0893638	0.0843537	0.0863629	0.0821263	0.130615	0.0673628	0.0933682	0.21026	0.749381	0.985179	1.08111	0.112519
397	Benzoylcarnitine (Car(7:4))	2.72	level2			266.139	149.1	POS	C14H19NO4	HMDB0240664	苯甲酰基肉碱	105450-08-6		Benzenoids	苯环型化合物	Benzene and substituted derivatives	苯和取代衍生物	Benzoic acids and derivatives	苯甲酸及衍生物	0.00747136	0.0238827	0.0100876	0.0138139	0.0101465	2.49534e-05	0.025822	0.0119978	0.877327	0.851039	0.999442	0.868533	-0.203347
398	LPC(20:4)	2.72	level2			544.339	113.3	POS	C28H50NO7P	HMDB0010395				Lipids and lipid-like molecules	脂质和类脂分子	Glycerophospholipids	甘油磷脂类	Glycerophosphocholines	甘油磷酸胆碱	33.9126	39.896	25.9952	33.2679	26.0526	27.7948	46.8252	33.5575	0.0337878	0.972078	0.999955	1.0087	0.0125034
399	Eplerenone	2.72	level1			415.211	17.3	POS	C24H30O6			107724-20-9		Lipids and lipid-like molecules	脂质和类脂分子	Steroids and steroid derivatives	甾类和甾类衍生物	Steroid lactones	甾体内酯	0.418867	0.918204	1.40878	0.915283	1.39471	1.95752	0.8099	1.38738	1.08257	0.341306	0.962514	1.51579	0.600071
400	PC(42:6)	2.72	level2			862.63	33.2	POS	C50H88NO8P											0.732879	2.21526e-05	1.01022	0.581039	0.919471	0.752357	0.800634	0.824154	0.942967	0.470575	0.962514	1.41841	0.504279
401	Oxononanoylcarnitine (Car(9:1-O))	2.71	level2			316.212	143.1	POS	C16H29NO5											0.145355	0.201039	0.245916	0.197437	0.246044	0.143089	0.158699	0.182611	0.447195	0.749118	0.985179	0.924909	-0.112616
402	PC(33:1)	2.71	level2			728.557	37.8	POS	C41H80NO8P											0.468424	0.346539	0.213236	0.342733	0.16069	0.142497	0.118569	0.140586	1.99117	0.0537399	0.962514	0.410189	-1.28564
403	L-NG-Monomethylarginine	2.71	level2			189.135	287.9	POS	C7H16N4O2	HMDB0029416		17035-90-4	C03884	Organic acids and derivatives	有机酸及其衍生物	Carboxylic acids and derivatives	羧酸及衍生物	Amino acids, peptides, and analogues	氨基酸、肽和类似物	0.877446	1.30389	1.49961	1.22698	1.33029	1.58509	0.846933	1.2541	0.060597	0.928484	0.999955	1.0221	0.0315423
404	1,2,3,6-Tetrahydropyridine-4-carboxylic acid	2.71	level2			128.071	263.5	POS	C6H9NO2	HMDB0253644			C13694	Organoheterocyclic compounds	有机杂环化合物	Pyridines and derivatives	吡啶及衍生物	Hydropyridines		0.398358	0.466728	0.45588	0.440322	0.433037	0.515006	0.39852	0.448854	0.234613	0.84358	0.999262	1.01938	0.027689
405	3-{[4-(Trifluoromethyl)phenyl]amino}cyclohex-2-en-1-one	2.71	level2			256.095	236.2	POS	C13H12F3NO					Benzenoids	苯环型化合物	Benzene and substituted derivatives	苯和取代衍生物	Trifluoromethylbenzenes		0.0102949	0.00715304	0.00741187	0.00828662	0.00786239	0.00837287	0.00877355	0.00833627	0.122575	0.964239	0.999955	1.00599	0.008619
406	Argininic_acid	2.71	level2			176.103	227.8	POS	C6H13N3O3	HMDB0003148		157-07-3		Organic acids and derivatives	有机酸及其衍生物	Carboxylic acids and derivatives	羧酸及衍生物	Amino acids, peptides, and analogues	氨基酸、肽和类似物	1.1366	0.897452	0.887754	0.973933	0.963993	0.823789	1.32413	1.0373	0.354817	0.727915	0.982537	1.06507	0.0909422
407	N-Ethylglycine	2.71	level2			104.07	217.3	POS	C4H9NO2	HMDB0041945		627-01-0	C11735	Organic acids and derivatives	有机酸及其衍生物	Carboxylic acids and derivatives	羧酸及衍生物	Amino acids, peptides, and analogues	氨基酸、肽和类似物	0.22485	0.238683	0.191711	0.218415	0.19154	0.185228	0.180133	0.185634	1.73665	0.0839536	0.962514	0.849913	-0.234614
408	1-Amino-1-cyclobutanecarboxylic acid	2.71	level2			116.07	184.6	POS	C5H9NO2					Organic acids and derivatives	有机酸及其衍生物	Carboxylic acids and derivatives	羧酸及衍生物	Amino acids, peptides, and analogues	氨基酸、肽和类似物	22.9937	26.468	19.7501	23.0706	19.7318	13.4238	27.4287	20.1948	0.752685	0.556707	0.962514	0.875347	-0.192073
409	(2-Phenyl-1,3-benzothiazol-5-yl)acetic acid	2.71	level2			270.059	155	POS	C15H11NO2S					Organoheterocyclic compounds	有机杂环化合物	Benzothiazoles		Benzothiazoles		0.0847596	0.0560981	0.0835513	0.074803	0.0795498	0.0759792	0.0746882	0.0767391	0.272897	0.856166	0.999442	1.02588	0.0368656
410	Docosapentaenoic acid	2.71	level2			330.504	140.5	POS	C22H34O2			25182-74-5		Organic acids and derivatives	有机酸及其衍生物	Carboxylic acids and derivatives	羧酸及衍生物	Amino acids, peptides, and analogues	氨基酸、肽和类似物	0.994705	1.01105	1.03732	1.01436	1.07346	1.17226	1.12607	1.12393	2.01579	0.0244336	0.962514	1.10802	0.147986
411	1-Behenoyl-2-hydroxy-sn-glycero-3-phosphocholine	2.71	level2			580.433	109	POS	C30H62NO7P	HMDB0010398			C04230	Lipids and lipid-like molecules	脂质和类脂分子	Glycerophospholipids	甘油磷脂类	Glycerophosphocholines	甘油磷酸胆碱	0.842502	2.21526e-05	0.706981	0.516502	0.792564	0.469486	0.533977	0.598676	0.880431	0.783169	0.991008	1.1591	0.213002
412	(2-{[3-hydroxy-2-tetradecanamidooctadec-4-en-1-yl phosphonato]oxy}ethyl)trimethylazanium	2.71	level2			733.548	106.4	NEG	C37H75N2O6P	HMDB0012097		121999-55-1		Lipids and lipid-like molecules	脂质和类脂分子	Sphingolipids	鞘脂类	Phosphosphingolipids	鞘磷脂	0.304548	0.19926	0.214705	0.239505	0.266928	0.0996022	0.150372	0.172301	1.30655	0.321284	0.962514	0.719405	-0.475123
413	1-(1Z-Octadecenyl)-sn-glycero-3-phosphocholine	2.71	level2			508.376	103.8	POS	C26H54NO6P	HMDB0013122			C04230	Lipids and lipid-like molecules	脂质和类脂分子	Glycerophospholipids	甘油磷脂类	Glycerophosphocholines	甘油磷酸胆碱	0.635587	0.481277	0.371089	0.495984	0.378322	0.499027	0.190784	0.356044	1.22456	0.301309	0.962514	0.717854	-0.478239
414	1H-Pyrazolo[3,4-d]pyrimidine-3,4-diamine, N3-(4-fluorophenyl)-	2.71	level2			245.095	46.6	POS	C11H9FN6					Organoheterocyclic compounds	有机杂环化合物	Pyrazolopyrimidines	吡唑并嘧啶	Pyrazolo[3,4-d]pyrimidines	吡唑并[3,4-d]嘧啶	0.398694	0.351053	0.160626	0.303458	0.16629	0.124588	0.380354	0.223744	0.801147	0.49972	0.962514	0.737315	-0.439646
415	1,2-Dipalmitoleoyl-sn-glycero-3-phosphocholine	2.71	level2			730.536	37.5	POS	C40H76NO8P	HMDB0008002			C00157	Lipids and lipid-like molecules	脂质和类脂分子	Glycerophospholipids	甘油磷脂类	Glycerophosphocholines	甘油磷酸胆碱	2.38509e-05	1.76803	1.99755	1.2552	1.88459	1.89425	1.81342	1.86409	1.08104	0.436456	0.962514	1.48509	0.570548
416	1,2-Diarachidonoyl-sn-glycero-3-phosphocholine	2.71	level2			830.567	33.5	POS	C48H80NO8P	HMDB0008443				Lipids and lipid-like molecules	脂质和类脂分子	Glycerophospholipids	甘油磷脂类	Glycerophosphocholines	甘油磷酸胆碱	1.33368	1.7308	1.76682	1.61043	1.55774	1.73857	2.34116e-05	1.09878	1.08858	0.4194	0.962514	0.682288	-0.551548
417	N-Desmethyltapentadol	2.71	level2			208.169	16.5	POS	C13H21NO	HMDB0060611				Benzenoids	苯环型化合物	Benzene and substituted derivatives	苯和取代衍生物	Phenylpropanes	苯丙烷	0.219239	0.227569	0.284704	0.243837	0.245772	0.186995	0.26961	0.234126	0.32967	0.776861	0.990072	0.960173	-0.0586343
418	5-(3-Chlorophenyl)-5-methylimidazolidine-2,4-dione	2.71	level2			223.028	16.5	NEG	C10H9ClN2O2					Organoheterocyclic compounds	有机杂环化合物	Azolidines	氮杂环戊烷	Imidazolidines		2.006	1.64044	1.74069	1.79571	1.42259	1.81819	1.87332	1.7047	0.498303	0.637916	0.969468	0.949318	-0.0750359
419	S-2,5-Dimethyl-3-furanyl_3-methylbutanethioate	2.71	level2			213.095	13.8	POS	C11H16O2S	HMDB0037153		55764-28-8		Organosulfur compounds	有机硫化合物	Thioethers		Aryl thioethers		0.0349912	2.21526e-05	0.0188799	0.0179644	0.0192524	0.0287786	0.0449137	0.0309815	0.998731	0.359165	0.962514	1.72461	0.786267
420	Xanthotoxol	2.71	level2			201.02	7.7	NEG	C11H6O4	HMDB0029457		2009-24-7	C00841	Phenylpropanoids and polyketides	苯丙素类和聚酮类	Coumarins and derivatives	香豆素类及其衍生物	Furanocoumarins		0.0284708	0.00311111	0.026332	0.0193046	0.0226794	0.0309754	0.0235893	0.025748	0.869555	0.49228	0.962514	1.33377	0.415514
421	Dodecylbenzenesulfonic acid	2.71	level2			325.184	1.5	NEG	C18H30O3S	HMDB0059915				Benzenoids	苯环型化合物	Benzene and substituted derivatives	苯和取代衍生物	Benzenesulfonic acids and derivatives		6.87516e-06	0.0645381	0.0672487	0.0439312	0.0680494	0.0679062	0.0703556	0.0687704	1.09438	0.37566	0.962514	1.56541	0.646542
422	Thelephoric acid	2.71	level2			351.01	256.8	NEG	C18H8O8	HMDB0030552		479-64-1		Organoheterocyclic compounds	有机杂环化合物	Benzofurans	苯并呋喃	Benzofurans		0.159559	0.155757	0.162823	0.15938	0.157514	0.16111	0.156265	0.158296	0.47268	0.687656	0.975912	0.9932	-0.00984321
423	2-Methylpropanamine	2.71	level2			74.0964	138.6	POS	C4H11N	HMDB0034198		78-81-9	C02787	Organic nitrogen compounds	有机含氮化合物	Organonitrogen compounds	有机氮化合物	Amines	胺	10.7061	8.53627	8.06042	9.10093	8.4218	9.39454	12.0053	9.94056	0.708324	0.566158	0.962514	1.09226	0.127313
424	Heptanoylcarnitine (Car(7:0))	2.71	level2			274.201	130	POS	C14H27NO4	HMDB0013238	庚酰肉碱			Lipids and lipid-like molecules	脂质和类脂分子	Fatty Acyls	脂肪酰类	Fatty acid esters	脂肪酸酯	0.0960116	2.21526e-05	0.0575427	0.0511921	0.0595599	0.101906	0.170673	0.110713	1.04747	0.23609	0.962514	2.1627	1.11283
425	PC(22:2)	2.71	level2			572.37	111.8	POS	C30H56NO8P											0.730798	1.26234	1.03962	1.01092	0.960041	2.49534e-05	0.995463	0.651843	1.02581	0.375783	0.962514	0.644802	-0.633073
426	Palmitoleylcarnitine (Car(16:1))	2.71	level2			398.326	90.6	POS	C23H43NO4	HMDB0006317	反式-十六碳- 2 -烯酰基肉碱			Lipids and lipid-like molecules	脂质和类脂分子	Fatty Acyls	脂肪酰类	Fatty acid esters	脂肪酸酯	0.0658986	0.125814	0.196643	0.129452	0.234842	0.331888	0.114374	0.227035	1.20377	0.254381	0.962514	1.75381	0.810496
427	PC(34:4)	2.71	level2			754.54	36.7	POS	C42H76NO8P											0.353975	0.455447	0.417946	0.409123	0.327511	0.316991	0.613558	0.419353	0.0397073	0.924613	0.999955	1.02501	0.0356327
428	Sodium lauryl sulfoacetate	2.71	level2			289.147	13.5	NEG	C14H28O5S		月桂酰基磺基醋酸酯	1847-58-1		Organic acids and derivatives	有机酸及其衍生物	Organic sulfonic acids and derivatives	有机磺酸及衍生物	Organosulfonic acids and derivatives	有机磺酸及衍生物	0.249968	0.113668	0.211437	0.191691	0.209398	6.39171e-06	0.130364	0.113256	1.05756	0.344852	0.962514	0.590825	-0.759196
429	Tetradecenoylcarnitine (Car(14:1))	2.7	level2			370.295	96.5	POS	C21H39NO4	HMDB0013329	O - ( 2 -十四碳烯酰基)肉碱	835598-21-5		Lipids and lipid-like molecules	脂质和类脂分子	Fatty Acyls	脂肪酰类	Fatty acid esters	脂肪酸酯	0.0379554	0.0774455	0.210737	0.108713	0.200668	2.49534e-05	0.0681013	0.0895981	0.923084	0.820171	0.997626	0.824174	-0.278979
430	PC(40:7)	2.7	level2			832.583	18.9	POS	C48H82NO8P											1.46301	1.93785	2.22433	1.87506	2.1728	2.39148	2.4499	2.33806	1.59784	0.123014	0.962514	1.24692	0.318373
431	2,6-Di-tert-butylphenol	2.7	level2			205.159	359.2	NEG	C14H22O					Benzenoids	苯环型化合物	Benzene and substituted derivatives	苯和取代衍生物	Phenylpropanes	苯丙烷	0.0114302	0.00988867	0.0115677	0.0109622	0.00972016	0.0120576	0.0108366	0.0108715	0.078584	0.921341	0.999955	0.991721	-0.0119933
432	L-Tryptophan	2.7	level2			205.097	285	POS	C11H12N2O2	HMDB0000929	L-色氨酸	73-22-3	C00078	Organoheterocyclic compounds	有机杂环化合物	Indoles and derivatives	吲哚和衍生物	carboxylic acids and derivatives	羧酸及衍生物	0.312809	0.166458	0.28243	0.253899	0.489862	0.613854	0.476628	0.526781	1.92469	0.0119635	0.962514	2.07476	1.05295
433	8-Iodoquinazolin-4-ol	2.7	level2			270.938	281.4	NEG	C8H5IN2O					Organoheterocyclic compounds	有机杂环化合物	Diazanaphthalenes	二氮杂萘	Benzodiazines	苯并二嗪	0.103915	0.0580837	0.142114	0.101371	0.0652021	0.091282	0.0991803	0.0852214	0.413824	0.573377	0.962912	0.840688	-0.250358
434	1,2,5,8-Tetrahydroxyanthracene-9,10-dione	2.7	level2			271.024	235.6	NEG	C14H8O6	HMDB0257032				Benzenoids	苯环型化合物	Anthracenes	蒽类	Anthraquinones	蒽醌	0.0104354	0.0062013	0.0102012	0.00894596	0.0127528	0.0083322	6.43614e-06	0.00703048	1.04836	0.655565	0.971897	0.785883	-0.347613
435	N-[4-(Pyridin-2-yl)-1,3-thiazol-2-yl]cyclopentanecarboxamide	2.7	level2			272.086	219.5	NEG	C14H15N3OS					Organic nitrogen compounds	有机含氮化合物	Organonitrogen compounds	有机氮化合物	N-arylamides		0.0193292	0.0226335	0.0188485	0.0202704	0.0197202	0.0136836	0.029739	0.0210476	0.0136513	0.879996	0.999955	1.03834	0.0542757
436	3,5-Dimethyl-1H-pyrazole-4-carboxylic acid	2.7	level2			139.051	189	NEG	C6H8N2O2					Organoheterocyclic compounds	有机杂环化合物	Azoles	吡咯类	Pyrazoles	吡唑	0.00451369	0.0136004	0.00566907	0.0079277	0.00498443	0.0141022	0.00835374	0.00914678	0.538965	0.77044	0.988911	1.15377	0.20636
437	5-(4-Aminophenyl)-4-phenyl-2,4-dihydro-3H-1,2,4-triazole-3-thione	2.7	level2			267.071	174.8	NEG	C14H12N4S					Organoheterocyclic compounds	有机杂环化合物	Azoles	吡咯类	Triazoles		0.00377457	0.00450608	0.00632955	0.00487007	0.00387775	0.00468182	0.004776	0.00444519	0.349697	0.6282	0.967266	0.912758	-0.131696
438	Tetracosahexaenoic acid	2.7	level2			356.546	173.1	POS	C24H36O2		二十四碳六烯酸	68378-49-4		Organic acids and derivatives	有机酸及其衍生物	Carboxylic acids and derivatives	羧酸及衍生物	Amino acids, peptides, and analogues	氨基酸、肽和类似物	0.0467796	0.0377381	0.0559256	0.0468144	0.0737121	0.078551	0.0927341	0.0816658	2.04589	0.0108734	0.962514	1.74446	0.802778
439	Methyl 1-piperazinecarboxylate	2.7	level2			145.097	172.7	POS	C6H12N2O2					Organoheterocyclic compounds	有机杂环化合物	Diazinanes		Piperazines		0.141395	0.126369	0.0326636	0.100142	0.0338579	0.00726426	0.139653	0.0602583	0.962723	0.492361	0.962514	0.601726	-0.732822
440	1-Isopropyl-1H-benzimidazole-5-carboxylic acid	2.7	level2			205.097	157.6	POS	C11H12N2O2					Organoheterocyclic compounds	有机杂环化合物	Benzimidazoles		Benzimidazoles		1.93681	2.21526e-05	2.23951	1.39212	2.58765	2.15564	2.3919	2.3784	0.980705	0.238522	0.962514	1.70848	0.77271
441	1-Benzylpyrrolidine-3-carboxylic acid	2.7	level2			206.118	126.8	POS	C12H15NO2					Organoheterocyclic compounds	有机杂环化合物	Pyrrolidines	吡咯烷	Pyrrolidine carboxylic acids and derivatives		0.0351718	0.0495313	0.0390225	0.0412418	0.0405543	0.125079	0.0229177	0.0628502	0.384001	0.564928	0.962514	1.52394	0.607808
442	Pummeline	2.7	level2			272.092	124	POS	C15H13NO4	HMDB0040382		145940-36-9		Organoheterocyclic compounds	有机杂环化合物	Quinolines and derivatives	喹啉及衍生物	Benzoquinolines		0.333571	0.178023	3.93549	1.48236	2.38091e-05	0.869669	1.16336	0.677686	0.716565	0.562555	0.962514	0.457166	-1.12921
443	Montecristin	2.7	level2			575.503	121.6	POS	C37H66O4	HMDB0029795		185336-15-6		Lipids and lipid-like molecules	脂质和类脂分子	Fatty Acyls	脂肪酰类	Fatty alcohols	脂肪醇	0.514502	2.21526e-05	0.312922	0.275815	0.349089	0.128108	0.216425	0.231207	0.773966	0.797728	0.99346	0.838268	-0.254517
444	4-Chloro-6-(1H-imidazol-1-yl)pyrimidine	2.7	level2			181.028	110.9	POS	C7H5ClN4					Organoheterocyclic compounds	有机杂环化合物	Diazines	二氮杂苯	Pyrimidines and pyrimidine derivatives	嘧啶类和嘧啶类衍生物	2.866	0.81742	1.01978	1.56773	0.816625	2.71917	1.26123	1.59901	0.10109	0.97301	0.999955	1.01995	0.0284985
445	1-Oleoyl-2-palmitoyl-sn-glycero-3-phosphocholine	2.7	level2			760.583	104.8	POS	C42H82NO8P	HMDB0008100				Lipids and lipid-like molecules	脂质和类脂分子	Glycerophospholipids	甘油磷脂类	Glycerophosphocholines	甘油磷酸胆碱	1.16818	1.65867	1.32596	1.38427	2.15455	1.41129	0.774254	1.4467	0.217072	0.890129	0.999955	1.0451	0.0636392
446	4-Oxo-1,4-dihydro-3-quinolinecarboxylic acid	2.7	level2			190.049	102.3	POS	C10H7NO3	HMDB0246559				Organoheterocyclic compounds	有机杂环化合物	Quinolines and derivatives	喹啉及衍生物	Quinoline carboxylic acids	喹啉羧酸	0.0996285	0.121252	0.288882	0.169921	0.289937	0.227315	0.0944525	0.203902	0.394687	0.703405	0.979231	1.19998	0.263011
447	4-(N-Methylacetamido)benzoic acid	2.7	level2			194.081	102.2	POS	C10H11NO3					Benzenoids	苯环型化合物	Benzene and substituted derivatives	苯和取代衍生物	Benzoic acids and derivatives	苯甲酸及衍生物	0.0826857	0.110781	0.556371	0.249946	0.548829	0.648178	0.484189	0.560398	1.59923	0.12549	0.962514	2.24208	1.16484
448	2-(2',3',4'-Trihydroxybutyl)quinoxaline	2.7	level2			235.107	60.2	POS	C12H14N2O3					Organoheterocyclic compounds	有机杂环化合物	Diazanaphthalenes	二氮杂萘	Benzodiazines	苯并二嗪	0.447057	2.44683	0.0160169	0.969968	0.14427	0.42186	2.17269	0.912941	0.491724	0.956468	0.999955	0.941208	-0.087415
449	3-(1-Methyl-4-morpholinopyrazolo[3,4-d]pyrimidin-6-yl)phenol	2.7	level2			310.132	54.9	NEG	C16H17N5O2					Organoheterocyclic compounds	有机杂环化合物	Pyrazolopyrimidines	吡唑并嘧啶	Pyrazolo[3,4-d]pyrimidines	吡唑并[3,4-d]嘧啶	0.18439	0.204437	0.19828	0.195702	0.19832	6.39171e-06	0.262274	0.153533	0.989307	0.647034	0.970838	0.784525	-0.350108
450	1-Palmitoyl-2-myristoyl-sn-glycero-3-phosphocholine	2.7	level2			706.54	38	POS	C38H76NO8P	HMDB0007965				Lipids and lipid-like molecules	脂质和类脂分子	Glycerophospholipids	甘油磷脂类	Glycerophosphocholines	甘油磷酸胆碱	0.474238	0.438632	0.559637	0.490836	0.60448	2.49534e-05	0.42914	0.344548	1.02173	0.469068	0.962514	0.701962	-0.510535
451	3-(1H-Benzimidazol-2-yl)-4-chloroaniline	2.7	level2			242.048	29.2	NEG	C13H10ClN3					Organoheterocyclic compounds	有机杂环化合物	Benzimidazoles		Phenylbenzimidazoles		0.0116709	0.00759254	0.133732	0.0509984	0.12436	6.39171e-06	0.0464975	0.0569547	0.665545	0.919024	0.999955	1.11679	0.159362
452	2-(4-Chlorophenyl)-3H-imidazo[4,5-c]pyridine	2.7	level2			228.033	28.8	NEG	C12H8ClN3					Organoheterocyclic compounds	有机杂环化合物	Azoles	吡咯类	Imidazoles	咪唑	0.00255151	0.00351028	0.0067839	0.0042819	0.00762797	6.39171e-06	0.00600816	0.00454751	0.820437	0.924948	0.999955	1.06203	0.0868264
453	1-O-Hexadecyl-2-O-acetyl-sn-glyceryl-3-phosphorylcholine	2.7	level2			524.37	27.7	POS	C26H54NO7P	HMDB0062195		74389-68-7		Lipids and lipid-like molecules	脂质和类脂分子	Glycerophospholipids	甘油磷脂类	Glycerophosphocholines	甘油磷酸胆碱	0.24235	0.609893	0.33946	0.397234	0.163369	0.679296	2.34116e-05	0.280896	1.09453	0.642905	0.970177	0.70713	-0.499953
454	Phthalazinone pyrazole	2.7	level2			316.121	23.3	NEG	C18H15N5O					Organoheterocyclic compounds	有机杂环化合物	Diazanaphthalenes	二氮杂萘	Benzodiazines	苯并二嗪	0.128336	0.0830384	0.323383	0.178252	0.44469	0.288216	0.182706	0.305204	1.18852	0.297028	0.962514	1.7122	0.775852
455	n-Octyl sulfate	2.7	level2			209.085	14.6	NEG	C8H18O4S					Organic acids and derivatives	有机酸及其衍生物	Organic sulfuric acids and derivatives	有机硫酸及衍生物	Sulfuric acid esters	硫酸酯	0.180396	0.149382	0.320374	0.216717	0.329043	0.0735753	0.205584	0.202734	0.461611	0.884805	0.999955	0.935477	-0.0962266
456	2-(4-Chlorophenyl)-1H-benzimidazole	2.7	level2			227.037	13.1	NEG	C13H9ClN2					Organoheterocyclic compounds	有机杂环化合物	Benzimidazoles		Phenylbenzimidazoles		0.257974	0.0680997	0.18725	0.171108	0.212708	6.39171e-06	0.113443	0.108719	1.02579	0.492767	0.962514	0.635384	-0.654299
457	Benzamide, 3-[[(2E)-3-(1H-indol-3-yl)-1-oxo-2-propen-1-yl]amino]-	2.7	level2			304.109	13	NEG	C18H15N3O2					Benzenoids	苯环型化合物	Benzene and substituted derivatives	苯和取代衍生物	Benzoic acids and derivatives	苯甲酸及衍生物	0.155532	0.126332	0.221877	0.167913	0.218258	0.0824461	0.0831791	0.127961	1.09595	0.494943	0.962514	0.762064	-0.392015
458	(5.Xi.,9.Xi.,18.Xi.)-3-Oxolup-20(29)-ene-27,28-dioic acid	2.7	level2			483.313	12.9	NEG	C30H44O5					Lipids and lipid-like molecules	脂质和类脂分子	Prenol lipids	异戊烯醇脂类	Triterpenoids		0.22399	0.33517	0.349246	0.302802	0.316659	0.0877111	0.330224	0.244865	0.796669	0.546629	0.962514	0.808662	-0.306391
459	Succinic_acid_semialdehyde	2.7	level2			101.024	227.2	NEG	C4H6O3	HMDB0001259		692-29-5	C00232	Lipids and lipid-like molecules	脂质和类脂分子	Fatty Acyls	脂肪酰类	Fatty acids and conjugates	脂肪酸和聚合物	0.404227	0.248552	0.438923	0.363901	0.447954	0.276623	0.34161	0.355396	0.166408	0.917308	0.999955	0.976628	-0.0341191
460	D-Ribose	2.7	level2			149.045	189.9	NEG	C5H10O5	HMDB0000283		613-83-2	C00121	Organic oxygen compounds	有机含氧化合物	Organooxygen compounds	有机氧化合物	Carbohydrates and carbohydrate conjugates	碳水化合物和碳水化合物结合物	0.0262586	0.0196191	0.00209024	0.0159893	0.0117655	0.011081	0.00860448	0.0104837	0.0526629	0.525699	0.962514	0.655666	-0.608966
461	1-(beta-D-Ribofuranosyl)-1,4-dihydronicotinamide	2.7	level2			257.113	68.2	POS	C11H16N2O5	HMDB0011648			C15497	Organic oxygen compounds	有机含氧化合物	Organooxygen compounds	有机氧化合物	Carbohydrates and carbohydrate conjugates	碳水化合物和碳水化合物结合物	0.359449	0.275647	0.465344	0.366813	0.464845	0.369335	0.354125	0.396102	0.500506	0.675204	0.974368	1.07985	0.110825
462	5-Oxo-ETE	2.7	level2			317.211	25	NEG	C20H30O3	HMDB0010217		126432-17-5	C14732	Lipids and lipid-like molecules	脂质和类脂分子	Fatty Acyls	脂肪酰类	Fatty acids and conjugates	脂肪酸和聚合物	6.87516e-06	0.0271187	0.00621315	0.0111129	0.00527578	0.0293057	0.0522127	0.0289314	1.20209	0.323542	0.962514	2.60341	1.3804
463	Maltotetraose	2.7	level2			665.213	277.4	NEG	C24H42O21	HMDB0001296	麦芽四糖	34612-38-9	C02013	Organic oxygen compounds	有机含氧化合物	Organooxygen compounds	有机氧化合物	Carbohydrates and carbohydrate conjugates	碳水化合物和碳水化合物结合物	0.0180876	0.00513808	0.0179833	0.0137363	0.00915289	0.0235274	0.0174037	0.0166947	0.605431	0.647047	0.970838	1.21537	0.281393
464	Oxoundecenoylcarnitine (Car(11:2-O))	2.7	level2			342.227	134.5	POS	C18H31NO5											0.0103189	0.00553033	0.0303311	0.0153934	0.0289827	2.49534e-05	0.0116422	0.01355	0.856813	0.878691	0.999955	0.880243	-0.184026
465	PC(39:5)	2.69	level2			822.598	33.9	POS	C47H84NO8P											0.733202	1.26326	2.1133	1.36992	1.2828	1.54194	1.64503	1.48992	0.693852	0.787394	0.991857	1.0876	0.121144
466	Oxododecenoylcarnitine (Car(12:2-O))	2.69	level2			356.243	144.5	POS	C19H33NO5											0.0641736	0.083272	0.115812	0.0877527	0.118522	0.049585	2.34116e-05	0.0560433	1.12676	0.445635	0.962514	0.638651	-0.6469
467	Threoninyl-Alanine	2.69	level2			191.103	281.2	POS	C7H14N2O4					Organic acids and derivatives	有机酸及其衍生物	Carboxylic acids and derivatives	羧酸及衍生物	Amino acids, peptides, and analogues	氨基酸、肽和类似物	0.164939	2.21526e-05	0.232798	0.132586	0.212683	0.208978	0.278812	0.233491	1.00211	0.237693	0.962514	1.76105	0.816435
468	3-Phenylcoumarin	2.69	level2			223.075	262.7	POS	C15H10O2					Phenylpropanoids and polyketides	苯丙素类和聚酮类	Isoflavonoids		Isoflav-3-enes		0.308144	0.243653	0.220419	0.257405	0.272301	0.235985	0.226723	0.245003	0.562019	0.697674	0.97791	0.951817	-0.0712441
469	3-Aminopentanoic acid	2.69	level2			116.071	223.7	NEG	C5H11NO2					Organic acids and derivatives	有机酸及其衍生物	Carboxylic acids and derivatives	羧酸及衍生物	Amino acids, peptides, and analogues	氨基酸、肽和类似物	0.0553298	0.0667999	6.34955e-06	0.040712	0.0403706	0.050458	0.0420875	0.0443054	0.869179	0.878439	0.999955	1.08826	0.122027
470	Succinic_anhydride	2.69	level2			99.0084	223	NEG	C4H4O3	HMDB0032523		108-30-5	C19524	Organic acids and derivatives	有机酸及其衍生物	Carboxylic acids and derivatives	羧酸及衍生物	Dicarboxylic acids and derivatives	二羧酸及衍生物	0.0127306	0.0129063	0.0135235	0.0130535	0.0126798	0.0119357	0.0103242	0.0116466	1.59497	0.128363	0.962514	0.892222	-0.164526
471	4H-1,2,4-Triazole-3-thiol, 4-phenyl-5-(4-pyridyl)-	2.69	level2			253.054	221.9	NEG	C13H10N4S					Organoheterocyclic compounds	有机杂环化合物	Pyridines and derivatives	吡啶及衍生物	Pyridyltriazoles		0.0216816	6.18187e-06	0.0156298	0.0124392	0.0160068	0.00562596	0.0133495	0.0116607	0.76341	0.918757	0.999955	0.93742	-0.0932328
472	L-Isoserine	2.69	level2			104.035	219.8	NEG	C3H7NO3					Organic acids and derivatives	有机酸及其衍生物	Carboxylic acids and derivatives	羧酸及衍生物	Amino acids, peptides, and analogues	氨基酸、肽和类似物	0.207901	0.224293	0.244498	0.225564	0.252795	0.161429	6.43614e-06	0.138077	1.12393	0.357886	0.962514	0.612139	-0.708068
473	Melibiose	2.69	level2			341.108	213.1	NEG	C12H22O11					Lipids and lipid-like molecules	脂质和类脂分子	Fatty Acyls	脂肪酰类	Fatty acyl glycosides	脂肪酰基糖苷	0.0207935	0.02578	0.00876985	0.0184478	0.00480538	0.00914243	0.00620817	0.00671866	1.73114	0.0874265	0.962514	0.364199	-1.4572
474	(2S)-4-Amino-2-hydroxybutanoic acid	2.69	level2			118.051	206.8	NEG	C4H9NO3					Organic acids and derivatives	有机酸及其衍生物	Carboxylic acids and derivatives	羧酸及衍生物	Amino acids, peptides, and analogues	氨基酸、肽和类似物	0.134024	6.18187e-06	0.174302	0.102778	0.184901	0.142952	0.237995	0.188616	1.00083	0.222137	0.962514	1.83519	0.875927
475	5,10-Dihydro-10-phenophosphazinol 10-oxide	2.69	level2			230.038	202.7	NEG	C12H10NO2P					Benzenoids	苯环型化合物	Benzenoids		Benzenoids		0.0142472	0.0159037	0.014962	0.0150376	0.013726	0.0145544	0.0133626	0.013881	1.52217	0.123987	0.962514	0.923084	-0.115466
476	4-Biphenylthiocarboxamide	2.69	level2			212.053	202.5	NEG	C13H11NS					Benzenoids	苯环型化合物	Benzene and substituted derivatives	苯和取代衍生物	Biphenyls and derivatives		0.0691735	0.0615751	0.0733655	0.0680381	0.0746087	6.39171e-06	0.0846757	0.0530969	0.986862	0.63315	0.967973	0.7804	-0.357714
477	N5-(1-Iminoethyl)-L-ornithine	2.69	level2			174.124	187.4	POS	C7H15N3O2					Organic acids and derivatives	有机酸及其衍生物	Carboxylic acids and derivatives	羧酸及衍生物	Amino acids, peptides, and analogues	氨基酸、肽和类似物	0.172166	0.190603	0.198484	0.187084	0.19049	0.182197	0.167332	0.180006	0.73494	0.530878	0.962514	0.962168	-0.0556395
478	Aminocyclopyrachlor	2.69	level2			214.039	184.6	POS	C8H8ClN3O2					Organoheterocyclic compounds	有机杂环化合物	Diazines	二氮杂苯	Pyrimidines and pyrimidine derivatives	嘧啶类和嘧啶类衍生物	0.360037	0.499463	0.331603	0.397034	0.262567	0.24738	0.362333	0.29076	1.42452	0.167778	0.962514	0.732329	-0.449435
479	8-(Trifluoromethyl)quinolin-4-ol	2.69	level2			212.032	183.2	NEG	C10H6F3NO					Organoheterocyclic compounds	有机杂环化合物	Quinolines and derivatives	喹啉及衍生物	Quinolines and derivatives		0.0766284	0.0669744	0.0585522	0.067385	0.0610889	0.039747	0.0944046	0.0650802	0.360922	0.89714	0.999955	0.965796	-0.0502093
480	2-(1H-Indol-3-ylmethylene)malononitrile	2.69	level2			194.071	169.5	POS	C12H7N3					Organoheterocyclic compounds	有机杂环化合物	Indoles and derivatives	吲哚和衍生物	Indoles	吲哚	0.051318	0.00375686	0.00224203	0.0191056	0.00229637	0.302984	0.137351	0.147544	1.05774	0.220034	0.962514	7.72252	2.94907
481	Benzenepropanoic acid, 4-[2-(2-methylphenyl)ethynyl]-	2.69	level2			265.121	162.6	POS	C18H16O2					Phenylpropanoids and polyketides	苯丙素类和聚酮类	Phenylpropanoic acids	苯丙酸类	Phenylpropanoic acids	苯丙酸类	0.267827	0.0436291	1.21082	0.507427	1.24454	0.40318	0.711204	0.786309	1.01042	0.555398	0.962514	1.5496	0.631898
482	3(2H)-Pyridazinone, 4-chloro-5-(4-morpholinyl)-	2.69	level2			216.054	160.7	POS	C8H10ClN3O2					Organic nitrogen compounds	有机含氮化合物	Organonitrogen compounds	有机氮化合物	Amines	胺	0.777096	1.04847	1.06275	0.962771	0.838514	1.01884	0.727423	0.861592	0.767608	0.466581	0.962514	0.894909	-0.160187
483	Diisopropyl_sulfide	2.69	level2			119.089	160.5	POS	C6H14S	HMDB0029579		625-80-9		Organosulfur compounds	有机硫化合物	Thioethers		Dialkylthioethers		5.36843	6.38753	7.30999	6.35531	7.42977	6.31466	5.83752	6.52731	0.257653	0.825952	0.997949	1.02706	0.0385259
484	Ethosuximide	2.69	level2			142.086	147.8	POS	C7H11NO2	HMDB0014731		77-67-8	C07505	Organoheterocyclic compounds	有机杂环化合物	Pyrrolidines	吡咯烷	Pyrrolidones		0.210909	0.478843	0.371207	0.353653	0.302335	0.275114	0.251059	0.276169	0.762566	0.383516	0.962514	0.780904	-0.356782
485	Crimidine	2.69	level2			172.063	143.2	POS	C7H10ClN3	HMDB0250537			C19138	Organic nitrogen compounds	有机含氮化合物	Organonitrogen compounds	有机氮化合物	Amines	胺	0.0708713	0.358564	0.0256446	0.151693	0.0280986	0.0635377	0.261541	0.117726	0.0204468	0.802432	0.994247	0.776078	-0.365727
486	Citrinin	2.69	level2			249.078	127.1	NEG	C13H14O5											0.0356127	0.0244562	0.0152237	0.0250975	0.0134269	0.0496556	0.0238896	0.0289907	0.189215	0.76695	0.988494	1.15512	0.208044
487	1-Lignoceroyl-2-hydroxy-sn-glycero-3-phosphocholine	2.69	level2			608.464	106.4	POS	C32H66NO7P	HMDB0010405			C04230	Lipids and lipid-like molecules	脂质和类脂分子	Glycerophospholipids	甘油磷脂类	Glycerophosphocholines	甘油磷酸胆碱	0.677067	2.21526e-05	0.543572	0.406887	0.636321	0.44087	2.34116e-05	0.359071	0.133615	0.8726	0.999955	0.882484	-0.180357
488	3-Chloro-6-nitro-9H-carbazole	2.69	level2			245.012	103.9	NEG	C12H7ClN2O2					Organoheterocyclic compounds	有机杂环化合物	Indoles and derivatives	吲哚和衍生物	Carbazoles		1.19155	2.65324	0.669597	1.50479	0.653666	3.74974	6.56811	3.65717	0.994389	0.29973	0.962514	2.43035	1.28116
489	4'-Ethenyl-2'-hydroxy-1,4',4a-trimethyl-5-oxospiro[2,3,4,7,8,8a-hexahydronaphthalene-6,1'-cyclopentane]-1-carboxylic acid	2.69	level2			335.221	83.4	POS	C20H30O4					Organic oxygen compounds	有机含氧化合物	Organooxygen compounds	有机氧化合物	Alcohols and polyols		1.17055	0.665364	0.00306376	0.612993	0.0170019	0.220798	1.52133	0.586376	0.182034	0.96559	0.999955	0.956579	-0.0640438
490	2-((3aR,4S,7R,7aS)-1,3-Dioxohexahydro-1H-4,7-methanoisoindol-2(3H)-yl)propanoic acid	2.69	level2			236.092	70.3	NEG	C12H15NO4					Organic acids and derivatives	有机酸及其衍生物	Carboxylic acids and derivatives	羧酸及衍生物	Amino acids, peptides, and analogues	氨基酸、肽和类似物	0.0674626	0.0615256	0.0534262	0.0608048	0.0462131	0.0442936	0.0471435	0.0458834	2.02072	0.0229125	0.962514	0.754601	-0.406213
491	3,3-Dimethyl-2-oxobutanoic acid	2.69	level2			129.055	62.3	NEG	C6H10O3					Organic acids and derivatives	有机酸及其衍生物	Keto acids and derivatives	酮酸及衍生物	Short-chain keto acids and derivatives	短链酮酸及衍生物	0.295944	0.387637	0.415934	0.366505	0.421442	0.33065	0.561257	0.437783	0.99514	0.402662	0.962514	1.19448	0.256382
492	6-Benzylaminouracil	2.69	level2			218.092	50.8	POS	C11H11N3O2					Benzenoids	苯环型化合物	Benzene and substituted derivatives	苯和取代衍生物	Benzylamines		0.184399	0.25814	2.35453e-05	0.147521	0.244746	0.367963	0.213943	0.275551	1.00845	0.228087	0.962514	1.86787	0.901396
493	(12Z)-9,10,11-Trihydroxyoctadec-12-enoic acid	2.69	level2			329.232	38.7	NEG	C18H34O5					Lipids and lipid-like molecules	脂质和类脂分子	Fatty Acyls	脂肪酰类	Fatty acids and conjugates	脂肪酸和聚合物	0.148264	0.270892	0.195675	0.204944	0.191125	0.129323	0.233826	0.184758	0.386377	0.688766	0.975912	0.901505	-0.149592
494	1,2-Di-(9Z,12Z,15Z-octadecatrienoyl)-sn-glycero-3-phosphocholine	2.69	level2			778.536	36.7	POS	C44H76NO8P	HMDB0008206		2701-19-1		Lipids and lipid-like molecules	脂质和类脂分子	Glycerophospholipids	甘油磷脂类	Glycerophosphocholines	甘油磷酸胆碱	0.15558	0.321068	0.239817	0.238822	0.196469	0.301436	0.391353	0.296419	0.947685	0.479	0.962514	1.24117	0.311705
495	2-Oxiraneoctanoic acid, .eta.-hydroxy-3-octyl-	2.69	level2			313.237	28.1	NEG	C18H34O4					Lipids and lipid-like molecules	脂质和类脂分子	Fatty Acyls	脂肪酰类	Lineolic acids and derivatives	亚油酸及衍生物	0.0870024	0.0861623	0.148576	0.107247	0.134417	0.044695	0.104708	0.0946067	0.579273	0.72524	0.982317	0.88214	-0.18092
496	17-Acetoxygrindelic acid	2.69	level2			377.235	22.4	NEG	C22H34O5					Lipids and lipid-like molecules	脂质和类脂分子	Prenol lipids	异戊烯醇脂类	Diterpenoids	二萜类	0.0806009	0.0687015	0.238792	0.129365	0.227633	0.215417	0.12821	0.19042	1.13455	0.388243	0.962514	1.47196	0.557738
497	cis-7-Hexadecenoic acid	2.69	level2			253.216	22.1	NEG	C16H30O2	HMDB0002186		2416-19-5		Lipids and lipid-like molecules	脂质和类脂分子	Fatty Acyls	脂肪酰类	Fatty acids and conjugates	脂肪酸和聚合物	1.78281	0.673464	4.45712	2.30446	4.0831	2.98093	1.89839	2.98747	0.799997	0.62397	0.966289	1.29639	0.374495
498	6-(Ethylsulfonyl)-2H-1,4-benzoxazin-3(4H)-one	2.69	level2			240.033	16.3	NEG	C10H11NO4S					Organoheterocyclic compounds	有机杂环化合物	Benzoxazines		Benzoxazinones		2.58848	2.56105	3.20149	2.78367	3.02179	0.869339	1.78623	1.89245	1.32733	0.246891	0.962514	0.679839	-0.556735
499	N-(4-Chlorophenyl)-1H-pyrazolo[3,4-d]pyrimidin-4-amine	2.69	level2			244.04	15.6	NEG	C11H8ClN5					Organoheterocyclic compounds	有机杂环化合物	Pyrazolopyrimidines	吡唑并嘧啶	Pyrazolo[3,4-d]pyrimidines	吡唑并[3,4-d]嘧啶	0.712631	0.0520389	1.27307	0.679245	0.963142	0.657514	1.4661	1.02892	0.964294	0.456242	0.962514	1.5148	0.599123
500	4-Methyl-N-(5-nitro-2-pyridinyl)benzenesulfonamide	2.69	level2			292.039	13.4	NEG	C12H11N3O4S					Benzenoids	苯环型化合物	Benzene and substituted derivatives	苯和取代衍生物	Toluenes		1.37139	6.18187e-06	0.645912	0.672436	0.622014	0.364173	0.885327	0.623838	0.84925	0.914214	0.999955	0.927729	-0.108225
501	1-[(1-Ethyl-3,5-dimethyl-1H-pyrazol-4-yl)sulfonyl]piperidine-4-carboxylic acid	2.69	level2			314.118	12.8	NEG	C13H21N3O4S					Organoheterocyclic compounds	有机杂环化合物	Piperidines	哌啶	Piperidinecarboxylic acids and derivatives		0.319149	0.407103	0.0744533	0.266902	0.0863653	0.0633345	0.137978	0.0958925	1.33061	0.168724	0.962514	0.35928	-1.47682
502	8-Desoxygartanin	2.69	level2			379.156	12.4	NEG	C23H24O5	HMDB0030701		33390-41-9		Organoheterocyclic compounds	有机杂环化合物	Benzopyrans	苯并吡喃	1-benzopyrans	1-苯并吡喃	0.000213721	0.000198195	0.000836107	0.000416007	0.000151842	0.281695	0.000254342	0.0940336	0.851794	0.423524	0.962514	226.038	7.82042
503	Butylated hydroxytoluene	2.69	level2			219.175	11.7	NEG	C15H24O	HMDB0033826		128-37-0	C14693	Benzenoids	苯环型化合物	Benzene and substituted derivatives	苯和取代衍生物	Phenylpropanes	苯丙烷	0.0315035	0.019638	0.0230914	0.0247443	0.0221138	0.0133624	0.0167176	0.0173979	1.58112	0.166443	0.962514	0.703108	-0.508183
504	6-Amino-2,4-dichloro-3-ethylphenol	2.69	level2			203.999	8.6	NEG	C8H9Cl2NO					Benzenoids	苯环型化合物	Benzene and substituted derivatives	苯和取代衍生物	Halobenzenes		0.000356587	0.000653781	0.000271347	0.000427238	0.000433328	6.39171e-06	0.000222593	0.000220771	1.16145	0.28937	0.962514	0.51674	-0.95249
505	beta-Cyano-alanine	2.69	level2			113.035	220.7	NEG	C4H6N2O2	HMDB0060245		6232-19-5	C02512	Organic acids and derivatives	有机酸及其衍生物	Carboxylic acids and derivatives	羧酸及衍生物	Amino acids, peptides, and analogues	氨基酸、肽和类似物	0.0117932	0.0145575	0.0227168	0.0163559	0.0241579	0.0128796	0.0159067	0.0176481	0.293306	0.797071	0.99346	1.07901	0.109703
506	Casticin	2.69	level2			375.099	173.7	POS	C19H18O8	HMDB0030660		479-91-4		Phenylpropanoids and polyketides	苯丙素类和聚酮类	Flavonoids	黄酮类	O-methylated flavonoids		0.189331	2.21526e-05	0.187951	0.125768	0.194015	2.49534e-05	0.187492	0.127177	0.0471719	0.988185	0.999955	1.0112	0.0160724
507	15-methyl_palmitic_acid	2.69	level2			269.248	170.1	NEG	C17H34O2	HMDB0061709				Lipids and lipid-like molecules	脂质和类脂分子	Fatty Acyls	脂肪酰类	Fatty acids and conjugates	脂肪酸和聚合物	0.0531169	0.0473578	0.0476857	0.0493868	0.0482748	0.0475983	6.43614e-06	0.0319599	1.10652	0.389317	0.962514	0.647133	-0.627865
508	butalbital	2.69	level2			223.108	156.9	NEG	C11H16N2O3	HMDB0014386		77-26-9		Organoheterocyclic compounds	有机杂环化合物	Diazines	二氮杂苯	Pyrimidines and pyrimidine derivatives	嘧啶类和嘧啶类衍生物	0.0403109	6.18187e-06	0.0158038	0.018707	0.0157139	0.012275	0.0260856	0.0180249	0.82907	0.958895	0.999955	0.963537	-0.0535887
509	Piracetam	2.69	level2			143.081	125.2	POS	C6H10N2O2	HMDB0256585				Organic acids and derivatives	有机酸及其衍生物	Carboxylic acids and derivatives	羧酸及衍生物	Amino acids, peptides, and analogues	氨基酸、肽和类似物	0.242825	0.216849	0.247741	0.235805	0.228482	0.167554	0.16193	0.185989	1.72711	0.0999687	0.962514	0.788739	-0.342379
510	Heptanoic_acid	2.69	level2			129.092	48.2	NEG	C7H14O2	HMDB0000666		111-14-8	C17714	Lipids and lipid-like molecules	脂质和类脂分子	Fatty Acyls	脂肪酰类	Fatty acids and conjugates	脂肪酸和聚合物	0.221006	0.0172977	0.420311	0.219538	0.418254	0.471531	0.346781	0.412189	1.16939	0.188954	0.962514	1.87753	0.908835
511	Pyrogallol	2.69	level2			125.024	169.4	NEG	C6H6O3	HMDB0013674	邻苯三酚	87-66-1	C01108	Benzenoids	苯环型化合物	Phenols	酚类	Benzenetriols and derivatives	苯三酚及衍生物	0.0902701	0.0969705	0.0788988	0.0887131	0.014878	0.0155148	0.108916	0.0464362	1.34502	0.252972	0.962514	0.523443	-0.933896
512	PC(18:1)	2.69	level2			536.335	128.7	POS	C26H50NO8P			56391-91-4								0.155515	0.43953	0.0270453	0.207364	0.0276256	0.0186084	0.244853	0.0970288	0.760181	0.482128	0.962514	0.467916	-1.09568
513	Micromelin	2.68	level2			289.072	321.3	POS	C15H12O6					Phenylpropanoids and polyketides	苯丙素类和聚酮类	Coumarins and derivatives	香豆素类及其衍生物	Coumarins and derivatives	香豆素类及其衍生物	2.38509e-05	0.21	0.218592	0.142872	0.220721	0.237313	0.220725	0.226253	1.09715	0.363545	0.962514	1.58361	0.663214
514	Piperazine-2-carboxylic acid	2.68	level2			131.082	305.6	POS	C5H10N2O2					Organic acids and derivatives	有机酸及其衍生物	Carboxylic acids and derivatives	羧酸及衍生物	Amino acids, peptides, and analogues	氨基酸、肽和类似物	0.487587	0.320963	0.337586	0.382045	2.38091e-05	0.460419	2.34116e-05	0.153489	1.52842	0.231965	0.962514	0.401755	-1.31561
515	(2-Oxo-4-morpholinyl)acetic acid	2.68	level2			160.06	280.7	POS	C6H9NO4					Organic acids and derivatives	有机酸及其衍生物	Carboxylic acids and derivatives	羧酸及衍生物	Amino acids, peptides, and analogues	氨基酸、肽和类似物	2.38509e-05	0.155121	0.205391	0.120179	0.229554	0.197438	0.244213	0.223735	1.13969	0.17735	0.962514	1.86169	0.896609
516	Adipoyl-L-carnitine	2.68	level2			290.16	232	POS	C13H23NO6	HMDB0061677		102636-83-9		Lipids and lipid-like molecules	脂质和类脂分子	Fatty Acyls	脂肪酰类	Fatty acid esters	脂肪酸酯	0.069509	0.0547584	0.0615718	0.0619464	0.0672188	0.0893594	0.0469712	0.0678498	0.264314	0.672405	0.974285	1.0953	0.131324
517	N-Nitroso-N-methyl-3-aminopropionic acid	2.68	level2			131.046	220.6	NEG	C4H8N2O3					Organic nitrogen compounds	有机含氮化合物	Organonitrogen compounds	有机氮化合物	Organic nitroso compounds		0.096525	0.122055	0.184462	0.134347	0.195811	0.0993029	0.124709	0.139941	0.108454	0.892721	0.999955	1.04164	0.0588534
518	1-(4-Aminobutyl)urea	2.68	level2			132.113	214	POS	C5H13N3O	HMDB0033458		6851-51-0	C00436	Organic acids and derivatives	有机酸及其衍生物	Carboximidic acids and derivatives		Carboximidic acids		0.00724467	0.00816115	0.0364162	0.017274	0.0393865	0.0629322	0.0137824	0.0387004	1.23474	0.278939	0.962514	2.24038	1.16374
519	3-Amino-4,4,4-trifluorobutanoic acid	2.68	level2			156.027	212.6	NEG	C4H6F3NO2					Organic acids and derivatives	有机酸及其衍生物	Carboxylic acids and derivatives	羧酸及衍生物	Amino acids, peptides, and analogues	氨基酸、肽和类似物	0.0115094	0.0123253	0.0149295	0.0129214	0.0149668	0.00625918	0.0135222	0.0115827	0.669188	0.666756	0.973183	0.896399	-0.157787
520	Val-Gly	2.68	level2			173.093	210.7	NEG	C7H14N2O3	HMDB0029127		686-43-1		Organic acids and derivatives	有机酸及其衍生物	Carboxylic acids and derivatives	羧酸及衍生物	Amino acids, peptides, and analogues	氨基酸、肽和类似物	0.065835	0.0920893	0.0579689	0.0719644	0.0601426	0.00973543	0.0377167	0.0358649	1.4615	0.113347	0.962514	0.49837	-1.00471
521	2-Amino-5,5,5-trifluoropentanoic acid	2.68	level2			170.043	202.7	NEG	C5H8F3NO2					Organic acids and derivatives	有机酸及其衍生物	Carboxylic acids and derivatives	羧酸及衍生物	Amino acids, peptides, and analogues	氨基酸、肽和类似物	0.111615	0.12803	0.23118	0.156942	0.2305	0.191447	0.120367	0.180771	0.535408	0.654697	0.971792	1.15184	0.203935
522	Neogrifolin	2.68	level2			327.232	201.4	NEG	C22H32O2	HMDB0030053		23665-96-5		Lipids and lipid-like molecules	脂质和类脂分子	Prenol lipids	异戊烯醇脂类	Sesquiterpenoids		6.87516e-06	6.18187e-06	0.0148755	0.00496284	0.0138935	0.0148178	0.0129359	0.0138824	1.59845	0.212562	0.962514	2.79727	1.48402
523	1-{4-Hydroxy-3,5-dinitrophenyl}ethanone	2.68	level2			225.014	183.6	NEG	C8H6N2O6					Benzenoids	苯环型化合物	Phenols	酚类	Nitrophenols		0.0368791	6.18187e-06	0.0397972	0.0255608	0.0398829	0.0429491	0.0386015	0.0404778	0.969289	0.364085	0.962514	1.58359	0.663197
524	4-(4-Aminophenoxy)benzoic acid	2.68	level2			230.082	173.7	POS	C13H11NO3					Benzenoids	苯环型化合物	Benzene and substituted derivatives	苯和取代衍生物	Diphenylethers		0.0344952	0.00857535	0.266196	0.103089	0.351436	0.0955439	0.0910432	0.179341	1.043	0.555894	0.962514	1.73968	0.798819
525	4-Fluoro-6-phenoxy-2-pyrimidinamine	2.68	level2			206.071	169.9	POS	C10H8FN3O					Organic oxygen compounds	有机含氧化合物	Organooxygen compounds	有机氧化合物	Ethers	醚	0.159415	0.0227176	0.0243767	0.0688364	0.0263611	0.588441	0.27405	0.296284	1.15383	0.249168	0.962514	4.30418	2.10574
526	4-Methyloxazole-5-carboxylic acid	2.68	level2			126.019	169.4	NEG	C5H5NO3					Organoheterocyclic compounds	有机杂环化合物	Azoles	吡咯类	Oxazoles		0.0334516	0.0390764	0.0356464	0.0360581	0.0334293	0.0595891	0.0383585	0.0437923	1.00629	0.398506	0.962514	1.21449	0.280352
527	(R)-3-Amino-4-methylpentanoic acid	2.68	level2			130.087	161	NEG	C6H13NO2					Organic acids and derivatives	有机酸及其衍生物	Carboxylic acids and derivatives	羧酸及衍生物	Amino acids, peptides, and analogues	氨基酸、肽和类似物	1.08315	0.862895	1.15744	1.03449	0.693526	0.580689	0.61434	0.629518	2.09056	0.012816	0.962514	0.608528	-0.716605
528	1-(4-Hydroxyphenyl)-2-methylaminoethanone	2.68	level2			164.071	155.2	NEG	C9H11NO2					Organic oxygen compounds	有机含氧化合物	Organooxygen compounds	有机氧化合物	Carbonyl compounds	羰基化合物	0.654296	0.733442	0.765509	0.717749	0.742438	0.69862	0.615987	0.685681	0.72815	0.55366	0.962514	0.955322	-0.0659407
529	Ethanol, 2-[[3-(2,3-dichlorophenoxy)propyl]amino]-	2.68	level2			264.054	155.1	POS	C11H15Cl2NO2					Benzenoids	苯环型化合物	Benzene and substituted derivatives	苯和取代衍生物	Halobenzenes		0.0990952	0.129816	0.116199	0.115037	0.0963498	0.131759	0.0908164	0.106308	0.603404	0.605739	0.964888	0.924126	-0.113839
530	2-(Aminomethyl)-4-methylpentanoic acid	2.68	level2			144.102	145.7	NEG	C7H15NO2					Organic acids and derivatives	有机酸及其衍生物	Carboxylic acids and derivatives	羧酸及衍生物	Amino acids, peptides, and analogues	氨基酸、肽和类似物	0.00458499	0.00791544	0.00346507	0.00532183	0.00348456	6.39171e-06	0.00739538	0.00362877	1.00063	0.538209	0.962514	0.681866	-0.552441
531	cis-11-Methyl-2-dodecenoic acid	2.68	level2			211.169	144	NEG	C13H24O2					Lipids and lipid-like molecules	脂质和类脂分子	Fatty Acyls	脂肪酰类	Fatty acids and conjugates	脂肪酸和聚合物	0.00919817	6.18187e-06	0.00473345	0.00464593	0.00513975	0.00474531	0.00708638	0.00565715	0.888613	0.731786	0.983134	1.21766	0.284106
532	2-Ethylbutan-1-amine	2.68	level2			102.128	139	POS	C6H15N					Organic nitrogen compounds	有机含氮化合物	Organonitrogen compounds	有机氮化合物	Amines	胺	2.38509e-05	0.754112	0.844369	0.532835	0.829077	0.906602	0.829381	0.85502	1.09857	0.351698	0.962514	1.60466	0.68227
533	[(2-Methoxybenzoyl)amino]acetic acid	2.68	level2			208.061	136.1	NEG	C10H11NO4					Benzenoids	苯环型化合物	Benzene and substituted derivatives	苯和取代衍生物	Benzoic acids and derivatives	苯甲酸及衍生物	0.00190834	0.00405204	0.00299368	0.00298469	0.00297914	0.000680245	0.00173423	0.00179787	1.2465	0.26125	0.962514	0.602366	-0.731288
534	8-Chloro-N-[3-(morpholin-4-yl)propyl]-5H-pyrimido[5,4-b]indol-4-amine	2.68	level2			344.127	132.5	NEG	C17H20ClN5O					Organoheterocyclic compounds	有机杂环化合物	Pyrrolopyrimidines		Pyrrolopyrimidines		0.0979296	0.0124845	0.318251	0.142889	0.40404	0.0819371	0.192735	0.226237	0.850035	0.559874	0.962514	1.58331	0.662947
535	(2R)-2,4-Dihydroxy-3,3-dimethylbutanoic acid	2.68	level2			147.066	131.6	NEG	C6H12O4	HMDB0240389		1112-33-0	C00522	Lipids and lipid-like molecules	脂质和类脂分子	Fatty Acyls	脂肪酰类	Fatty acids and conjugates	脂肪酸和聚合物	0.0109912	0.0123782	0.0176641	0.0136778	0.0177646	0.0100939	0.0106075	0.012822	0.443156	0.802562	0.994332	0.937431	-0.0932149
536	2,3-Dihydroxy-3-methylbutyric acid	2.68	level2			133.05	103	NEG	C5H10O4	HMDB0341247			C04039	Lipids and lipid-like molecules	脂质和类脂分子	Fatty Acyls	脂肪酰类	Fatty acids and conjugates	脂肪酸和聚合物	0.153952	0.174251	0.0678759	0.132026	0.0620176	0.039041	0.0702529	0.0571038	1.70088	0.0917298	0.962514	0.432518	-1.20917
537	Ethyl 3,5-dihydroxybenzoate	2.68	level2			181.05	102.2	NEG	C9H10O4					Benzenoids	苯环型化合物	Benzene and substituted derivatives	苯和取代衍生物	Benzoic acids and derivatives	苯甲酸及衍生物	0.223335	0.125244	0.235251	0.19461	0.240215	0.253312	0.198985	0.230838	0.890548	0.400056	0.962514	1.18616	0.246293
538	Ethyl sulfate	2.68	level2			124.991	74.1	NEG	C2H6O4S	HMDB0031233		540-82-9		Organic acids and derivatives	有机酸及其衍生物	Organic sulfuric acids and derivatives	有机硫酸及衍生物	Sulfuric acid esters	硫酸酯	0.562439	0.270783	0.854186	0.562469	0.811183	0.333105	0.249504	0.464597	0.607552	0.707549	0.979798	0.825996	-0.275794
539	2,4,6-Trimethoxypyrimidine	2.68	level2			171.076	68.7	POS	C7H10N2O3					Organic oxygen compounds	有机含氧化合物	Organooxygen compounds	有机氧化合物	Ethers	醚	0.174789	0.127959	0.0260947	0.109614	0.0259066	0.0103388	0.1495	0.0619152	0.906134	0.485695	0.962514	0.564846	-0.824071
540	3-Oxopentanoic acid	2.68	level2			115.04	64.1	NEG	C5H8O3	HMDB0245963			C02233	Organic acids and derivatives	有机酸及其衍生物	Keto acids and derivatives	酮酸及衍生物	Short-chain keto acids and derivatives	短链酮酸及衍生物	0.205829	0.468051	0.207173	0.293684	0.191486	0.166076	0.43563	0.264397	0.227014	0.822673	0.997626	0.900277	-0.151559
541	5-Methyl-1H-pyrazole-3-carbaldehyde	2.68	level2			109.04	62.4	NEG	C5H6N2O					Organic oxygen compounds	有机含氧化合物	Organooxygen compounds	有机氧化合物	Carbonyl compounds	羰基化合物	0.133019	0.122749	0.0911243	0.115631	0.095325	0.135981	0.0661148	0.0991403	0.870171	0.527517	0.962514	0.857388	-0.22198
542	(2E)-2-(Propan-2-yl)but-2-enedioic acid	2.68	level2			157.05	41.5	NEG	C7H10O4					Lipids and lipid-like molecules	脂质和类脂分子	Fatty Acyls	脂肪酰类	Fatty acids and conjugates	脂肪酸和聚合物	0.0583556	0.0643861	0.0162272	0.0463229	0.0155797	0.0120592	0.0475859	0.0250749	1.00388	0.323803	0.962514	0.541307	-0.885482
543	2-Oxooctanoic acid	2.68	level2			157.086	40.6	NEG	C8H14O3	HMDB0013211		328-51-8		Organic acids and derivatives	有机酸及其衍生物	Keto acids and derivatives	酮酸及衍生物	Medium-chain keto acids and derivatives	中链酮酸及衍生物	0.117307	0.0752375	0.0796613	0.0907354	0.102871	0.0904401	0.117581	0.103631	0.88253	0.451716	0.962514	1.14212	0.191716
544	Benzyl alcohol sulphate	2.68	level2			187.006	39.9	NEG	C7H8O4S	HMDB0034782				Benzenoids	苯环型化合物	Benzene and substituted derivatives	苯和取代衍生物	Benzene and substituted derivatives	苯和取代衍生物	0.00930636	0.0241254	0.00601131	0.0131477	0.00456184	0.215898	0.104765	0.108408	1.23283	0.258364	0.962514	8.24542	3.04359
545	Clausenidin	2.68	level2			327.122	39.1	NEG	C19H20O5					Phenylpropanoids and polyketides	苯丙素类和聚酮类	Coumarins and derivatives	香豆素类及其衍生物	Pyranocoumarins		0.0027608	0.00205248	0.00187479	0.00222936	0.00262776	6.39171e-06	0.00475861	0.00246425	0.827806	0.874954	0.999955	1.10537	0.144523
546	4,6-Dihydroxypyrimidine	2.68	level2			111.019	33.8	NEG	C4H4N2O2					Organoheterocyclic compounds	有机杂环化合物	Diazines	二氮杂苯	Pyrimidines and pyrimidine derivatives	嘧啶类和嘧啶类衍生物	0.441513	0.140092	0.504303	0.36197	0.313072	0.476039	0.302439	0.36385	0.28449	0.988777	0.999955	1.0052	0.00747573
547	3,4-Dihydroxymethamphetamine	2.68	level2			180.102	25.6	NEG	C10H15NO2	HMDB0246034				Benzenoids	苯环型化合物	Benzene and substituted derivatives	苯和取代衍生物	Phenethylamines		6.87516e-06	0.154415	0.182361	0.112261	0.17649	0.173721	0.131587	0.160599	1.06745	0.455326	0.962514	1.43059	0.516609
548	6-Oxocativic acid	2.68	level2			319.227	24.5	NEG	C20H32O3					Lipids and lipid-like molecules	脂质和类脂分子	Prenol lipids	异戊烯醇脂类	Diterpenoids	二萜类	1.58752	0.764655	0.0683262	0.806833	0.0657302	0.852326	2.36917	1.09574	0.194071	0.738145	0.984009	1.35808	0.441566
549	cis,cis-Muconic_acid	2.68	level2			141.02	251.7	NEG	C6H6O4	HMDB0006331		1119-72-8	C02480	Lipids and lipid-like molecules	脂质和类脂分子	Fatty Acyls	脂肪酰类	Fatty acids and conjugates	脂肪酸和聚合物	0.212675	0.00197763	0.198575	0.137743	0.000887666	0.00200572	0.205463	0.069452	0.761893	0.516863	0.962514	0.504216	-0.987887
550	4-Ethoxy-4-oxobut-2-enoic acid	2.68	level2			143.034	174.8	NEG	C6H8O4	HMDB0246416				Lipids and lipid-like molecules	脂质和类脂分子	Fatty Acyls	脂肪酰类	Fatty acid esters	脂肪酸酯	0.171732	0.19148	0.171101	0.178105	0.155206	0.20032	0.22004	0.191855	0.784456	0.535721	0.962514	1.07721	0.107296
551	Buprenorphine	2.68	level2			468.308	121.9	POS	C29H41NO4	HMDB0015057		52485-79-7	C08007	Benzenoids	苯环型化合物	Phenanthrenes and derivatives		Phenanthrenes and derivatives		2.84949	5.42214	3.39894	3.89019	3.09003	2.79973	3.46712	3.11896	0.863248	0.392679	0.962514	0.801749	-0.318777
552	L-RHAMNOSE	2.68	level2			163.06	113.5	NEG	C6H14O6	HMDB0000849		3615-41-6	C00507	Organic oxygen compounds	有机含氧化合物	Organooxygen compounds	有机氧化合物	Carbohydrates and carbohydrate conjugates	碳水化合物和碳水化合物结合物	0.0551868	0.0574592	0.0833571	0.0653343	0.086614	0.036619	0.0665699	0.0632676	0.333185	0.909668	0.999955	0.968367	-0.0463735
553	Thromboxane B2	2.68	level2			369.227	72.4	NEG	C20H34O6	HMDB0003252		54397-85-2	C05963							0.460192	0.489706	0.0106082	0.320169	0.0119912	0.147468	0.515946	0.225135	0.145769	0.682831	0.975248	0.703177	-0.508041
554	2-HYDROXY-4-(METHYLTHIO)BUTYRIC ACID	2.68	level2			149.027	57.4	NEG	C5H10O3S	HMDB0037115		120-91-2		Lipids and lipid-like molecules	脂质和类脂分子	Fatty Acyls	脂肪酰类	Fatty acids and conjugates	脂肪酸和聚合物	0.218411	0.138379	0.040688	0.132493	0.0410144	0.00882799	0.154402	0.0680816	1.05048	0.395578	0.962514	0.513852	-0.960576
555	DIHYDROJASMONIC_ACID	2.68	level2			211.133	39.5	NEG	C12H20O3	HMDB0033601		98674-52-3		Lipids and lipid-like molecules	脂质和类脂分子	Fatty Acyls	脂肪酰类	Lineolic acids and derivatives	亚油酸及衍生物	0.187039	0.26058	0.269805	0.239141	0.227248	0.12274	0.207249	0.185746	1.15934	0.266368	0.962514	0.77672	-0.364534
556	Isobutyric acid	2.68	level2			89.0596	27.4	POS	C4H8O2	HMDB0001873		79-31-2	C02632	Organic acids and derivatives	有机酸及其衍生物	Carboxylic acids and derivatives	羧酸及衍生物	Carboxylic acids	羧酸	2.86317	2.67041	2.97336	2.83565	2.80693	3.00143	2.34116e-05	1.93613	1.09274	0.451738	0.962514	0.682782	-0.550503
557	2,2'-Iminodiacetic acid	2.68	level2			132.03	236.1	NEG	C4H7NO4	HMDB0011753	亚氨基二乙酸	142-73-4	C19911	Organic acids and derivatives	有机酸及其衍生物	Carboxylic acids and derivatives	羧酸及衍生物	Amino acids, peptides, and analogues	氨基酸、肽和类似物	0.0479116	0.0264327	0.0441678	0.0395041	0.0429286	0.0406496	0.0426079	0.042062	0.487246	0.737263	0.984009	1.06475	0.0905177
558	Glyceraldehyde	2.68	level2			89.024	174.8	NEG	C3H6O3	HMDB0001051	甘油醛	56-82-6	C02154	Organic oxygen compounds	有机含氧化合物	Organooxygen compounds	有机氧化合物	Carbohydrates and carbohydrate conjugates	碳水化合物和碳水化合物结合物	2.40669	0.854708	0.834821	1.36541	2.54217	2.55428	1.02095	2.03913	0.842644	0.407234	0.962514	1.49343	0.578625
559	AS057278	2.68	level2			125.035	168.9	NEG	C5H6N2O2	HMDB0246825	5-甲基-3-吡唑甲酸	402-61-9		Organoheterocyclic compounds	有机杂环化合物	Azoles	吡咯类	Pyrazoles	吡唑	0.100205	0.106384	0.0883528	0.098314	0.0972576	0.1086	0.122956	0.109605	1.25653	0.283659	0.962514	1.11484	0.15684
560	PC(37:3)	2.68	level2			798.598	34.9	POS	C45H84NO8P		1- ( 9Z -十五碳酰基) -2-( 13Z , 16Z -二十二碳二烯酰基)-甘油-3 -磷酸胆碱			Lipids and lipid-like molecules	脂质和类脂分子	Glycerophospholipids	甘油磷脂类	Glycerophosphocholines	甘油磷酸胆碱	4.44197	6.44702	6.63149	5.84016	6.38665	5.83609	7.38924	6.53733	0.975348	0.451038	0.962514	1.11937	0.162693
561	PC(42:7)	2.68	level2			860.613	33.2	POS	C50H86NO8P											0.589023	1.34031	1.05472	0.994683	0.87848	0.744517	0.825361	0.816119	0.551187	0.466998	0.962514	0.820482	-0.285457
562	PC(35:4)	2.68	level2			768.551	19.3	POS	C43H78NO8P											2.38509e-05	0.368736	0.230679	0.199813	0.214766	0.362215	0.310564	0.295848	1.08479	0.45391	0.962514	1.48063	0.566209
563	3-Amino-3-(4-hydroxyphenyl)propanoic acid	2.67	level2			182.081	181.5	POS	C9H11NO3	HMDB0003831	3 -氨基- 3 - ( 4 -羟基苯基)丙酸	6049-54-3	C04368	Organic acids and derivatives	有机酸及其衍生物	Carboxylic acids and derivatives	羧酸及衍生物	Amino acids, peptides, and analogues	氨基酸、肽和类似物	0.329731	2.21526e-05	0.385829	0.238527	0.437004	0.46249	0.378251	0.425915	0.99627	0.202028	0.962514	1.7856	0.836412
564	Ethyl hydrazinoacetate	2.67	level2			119.082	310.2	POS	C4H10N2O2					Organic acids and derivatives	有机酸及其衍生物	Carboxylic acids and derivatives	羧酸及衍生物	Amino acids, peptides, and analogues	氨基酸、肽和类似物	4.46332	2.37324	4.01166	3.61607	2.38091e-05	3.62927	6.00437	3.21122	0.804439	0.838154	0.998764	0.888042	-0.1713
565	4-Chloro-6-[4-(2-fluorophenyl)piperazin-1-yl]pyrimidine	2.67	level2			293.097	253.8	POS	C14H14ClFN4					Organoheterocyclic compounds	有机杂环化合物	Diazinanes		Piperazines		134.58	2.21526e-05	92.641	75.7405	96.5085	2.49534e-05	114.343	70.2839	0.0595065	0.923403	0.999955	0.927956	-0.107871
566	2-Hydroxy-2',3'-dichlorobiphenyl	2.67	level2			236.987	238.2	NEG	C12H8Cl2O					Benzenoids	苯环型化合物	Benzene and substituted derivatives	苯和取代衍生物	Biphenyls and derivatives		6.87516e-06	6.18187e-06	0.0126358	0.00421629	0.0137935	0.0130469	0.0218374	0.0162259	1.64552	0.076676	0.962514	3.84839	1.94426
567	1-Pyrrolidinecarboximidamide	2.67	level2			114.103	235.3	POS	C5H11N3					Organoheterocyclic compounds	有机杂环化合物	Pyrrolidines	吡咯烷	Pyrrolidines	吡咯烷	0.391938	0.313812	0.382476	0.362742	2.38091e-05	0.385995	0.443308	0.276442	0.830159	0.574508	0.962912	0.762091	-0.391965
568	Malonyl-L-carnitine	2.67	level2			248.113	230.1	POS	C10H17NO6	HMDB0002095		910825-21-7		Lipids and lipid-like molecules	脂质和类脂分子	Fatty Acyls	脂肪酰类	Fatty acid esters	脂肪酸酯	0.138877	0.0764082	0.149775	0.121687	0.154499	0.173224	0.0834574	0.13706	0.304492	0.688418	0.975912	1.12633	0.171636
569	Val-Glu	2.67	level2			247.129	222.8	POS	C10H18N2O5					Organic acids and derivatives	有机酸及其衍生物	Carboxylic acids and derivatives	羧酸及衍生物	Amino acids, peptides, and analogues	氨基酸、肽和类似物	0.0606598	0.0781733	0.0799237	0.0729189	0.082085	0.0517408	0.0720678	0.0686312	0.48582	0.712635	0.981229	0.941199	-0.0874284
570	N-Methyl-L-histidine	2.67	level2			168.077	222.2	NEG	C7H11N3O2					Organic acids and derivatives	有机酸及其衍生物	Carboxylic acids and derivatives	羧酸及衍生物	Amino acids, peptides, and analogues	氨基酸、肽和类似物	0.1254	0.11946	0.120242	0.1217	0.124551	0.0366357	0.0890833	0.0834234	1.31695	0.272297	0.962514	0.685482	-0.544809
571	N-Acetylneuraminic acid	2.67	level2			308.097	219.5	NEG	C11H19NO9					Organic oxygen compounds	有机含氧化合物	Organooxygen compounds	有机氧化合物	Carbohydrates and carbohydrate conjugates	碳水化合物和碳水化合物结合物	0.0124064	0.0107758	0.0103187	0.0111669	0.011568	0.00888812	0.00760421	0.00935346	1.42966	0.243969	0.962514	0.837602	-0.255663
572	3-Cyano-7-hydroxycoumarin	2.67	level2			188.035	217.5	POS	C10H5NO3					Phenylpropanoids and polyketides	苯丙素类和聚酮类	Coumarins and derivatives	香豆素类及其衍生物	Hydroxycoumarins		0.261061	0.416773	0.109602	0.262478	0.115264	0.112569	0.320463	0.182765	0.65365	0.51689	0.962514	0.696305	-0.522208
573	O-Methyl-DL-serine	2.67	level2			120.065	207.4	POS	C4H9NO3	HMDB0341365				Organic acids and derivatives	有机酸及其衍生物	Carboxylic acids and derivatives	羧酸及衍生物	Amino acids, peptides, and analogues	氨基酸、肽和类似物	0.939669	2.22031	1.1083	1.42276	1.14559	1.02186	1.66279	1.27675	0.115096	0.760382	0.98721	0.897376	-0.156215
574	4-Hydroxy-4'-chlorobiphenyl	2.67	level2			203.028	207.3	NEG	C12H9ClO					Benzenoids	苯环型化合物	Benzene and substituted derivatives	苯和取代衍生物	Biphenyls and derivatives		0.0623832	6.18187e-06	0.0705144	0.0443012	0.0715494	0.0693149	0.0972255	0.0793633	1.00048	0.2179	0.962514	1.79145	0.841124
575	5,5,5-Trifluoroleucine	2.67	level2			184.058	191.8	NEG	C6H10F3NO2					Organic acids and derivatives	有机酸及其衍生物	Carboxylic acids and derivatives	羧酸及衍生物	Amino acids, peptides, and analogues	氨基酸、肽和类似物	0.00432025	0.00551551	0.00872066	0.00618547	0.00861243	6.39171e-06	0.00465436	0.0044244	1.00449	0.565187	0.962514	0.715288	-0.483404
576	Undecanedioic acid	2.67	level2			215.128	188	NEG	C11H20O4	HMDB0000888		1852-04-6		Lipids and lipid-like molecules	脂质和类脂分子	Fatty Acyls	脂肪酰类	Fatty acids and conjugates	脂肪酸和聚合物	0.00367482	6.18187e-06	0.00335351	0.00234484	0.00254553	0.00241154	0.00441133	0.0031228	0.897681	0.592362	0.963407	1.33178	0.413351
577	Diethyl 2-propyl-1H-imidazole-4,5-dicarboxylate	2.67	level2			253.118	174.5	NEG	C12H18N2O4					Organoheterocyclic compounds	有机杂环化合物	Azoles	吡咯类	Imidazoles	咪唑	0.0273162	0.0394998	0.0108748	0.0258969	0.0117505	0.00471727	0.0319302	0.0161326	0.922305	0.448459	0.962514	0.622955	-0.682799
578	N-(1H-Indol-3-ylacetyl)methionine	2.67	level2			305.098	169	NEG	C15H18N2O3S					Organic acids and derivatives	有机酸及其衍生物	Carboxylic acids and derivatives	羧酸及衍生物	Amino acids, peptides, and analogues	氨基酸、肽和类似物	0.0603337	0.0742673	0.0598564	0.0648191	0.0654359	0.0560044	0.0779895	0.0664766	0.264684	0.84465	0.999293	1.02557	0.0364272
579	Amobarbital	2.67	level2			225.124	166.7	NEG	C11H18N2O3	HMDB0015440		57-43-2	C07536	Organoheterocyclic compounds	有机杂环化合物	Diazines	二氮杂苯	Pyrimidines and pyrimidine derivatives	嘧啶类和嘧啶类衍生物	0.0240199	0.0298347	0.0303631	0.0280725	0.0307523	0.012014	0.0182726	0.0203463	1.33633	0.258503	0.962514	0.724776	-0.464393
580	L-3-Aminoisobutyric acid	2.67	level2			102.056	160.1	NEG	C4H9NO2	HMDB0002166		4249-19-8	C03284	Organic acids and derivatives	有机酸及其衍生物	Carboxylic acids and derivatives	羧酸及衍生物	Amino acids, peptides, and analogues	氨基酸、肽和类似物	0.0162465	0.018484	0.0227601	0.0191636	0.0232752	0.0170937	0.0175306	0.0192998	0.00501331	0.962983	0.999955	1.00711	0.0102243
581	DL-2-Methylglutamic acid	2.67	level2			160.061	159.2	NEG	C6H11NO4					Organic acids and derivatives	有机酸及其衍生物	Carboxylic acids and derivatives	羧酸及衍生物	Amino acids, peptides, and analogues	氨基酸、肽和类似物	0.0677241	0.0512391	0.0728336	0.0639323	0.0675227	0.0618217	0.0557799	0.0617081	0.346212	0.777127	0.990148	0.965211	-0.0510841
582	1,3-Dihydroxy-7,8,9,10-tetrahydro-6H-benzo[c]chromen-6-one	2.67	level2			231.067	135.9	NEG	C13H12O4					Phenylpropanoids and polyketides	苯丙素类和聚酮类	Coumarins and derivatives	香豆素类及其衍生物	Coumarins and derivatives	香豆素类及其衍生物	0.00510207	0.0132142	0.0183498	0.012222	0.0193742	0.0136771	0.0148081	0.0159531	1.01904	0.427693	0.962514	1.30528	0.384356
583	1',3',3'-Trimethyl-6,8-dinitrospiro[chromene-2,2'-indoline]	2.67	level2			368.125	130.1	POS	C19H17N3O5					Organoheterocyclic compounds	有机杂环化合物	Benzopyrans	苯并吡喃	1-benzopyrans	1-苯并吡喃	0.0919337	0.0152143	0.223246	0.110131	0.262053	0.19889	0.139674	0.200205	1.16845	0.26915	0.962514	1.81788	0.862257
584	3.alpha.,7.alpha.-Dihydroxy-12-oxocholanoic acid	2.67	level2			405.263	106	NEG	C24H38O5	HMDB0000400		204023		Lipids and lipid-like molecules	脂质和类脂分子	Steroids and steroid derivatives	甾类和甾类衍生物	Bile acids, alcohols and derivatives	胆汁酸类、醇类及其衍生物	6.87516e-06	0.0164095	0.000979976	0.00579877	0.000355648	0.000207371	0.00021601	0.000259676	0.234827	0.4066	0.962514	0.0447812	-4.48096
585	(3-Phenylpropionyl)glycine	2.67	level2			206.081	100.8	NEG	C11H13NO3	HMDB0000860		56613-60-6		Organic acids and derivatives	有机酸及其衍生物	Carboxylic acids and derivatives	羧酸及衍生物	Amino acids, peptides, and analogues	氨基酸、肽和类似物	6.87516e-06	0.0118127	0.00760425	0.00647462	0.00752247	0.0047472	0.00862068	0.00696345	0.964986	0.899705	0.999955	1.0755	0.105006
586	6,15-Diketo-13,14-dihydroprostaglandin F1.alpha.	2.67	level2			369.227	96	NEG	C20H34O6					Lipids and lipid-like molecules	脂质和类脂分子	Fatty Acyls	脂肪酰类	Eicosanoids	类花生酸	0.0466246	0.0688495	0.00175859	0.0390775	0.00147228	0.0150719	0.0576942	0.0247461	0.270048	0.610869	0.964967	0.633257	-0.659136
587	N-Methyl-N-(methylsulfonyl)glycine	2.67	level2			166.017	73.8	NEG	C4H9NO4S					Organic acids and derivatives	有机酸及其衍生物	Carboxylic acids and derivatives	羧酸及衍生物	Amino acids, peptides, and analogues	氨基酸、肽和类似物	0.0696182	6.18187e-06	0.0621375	0.0439206	0.0555375	0.0687349	6.43614e-06	0.0414263	0.119907	0.938747	0.999955	0.943208	-0.0843523
588	Methanone, [1-(5-fluoropentyl)-2-hydroxy-1H-indol-3-yl]-1-naphthalenyl-	2.67	level2			374.154	72.4	NEG	C24H22FNO2					Organoheterocyclic compounds	有机杂环化合物	Indoles and derivatives	吲哚和衍生物	Naphthoylindoles		6.87516e-06	0.0316354	0.0267057	0.0194493	0.0232875	0.0123897	0.0292735	0.0216502	0.976175	0.851148	0.999442	1.11316	0.154662
589	9-Deoxy-9-methylene-16,16-dimethylprostaglandin E2	2.67	level2			377.268	65.9	NEG	C23H38O4					Lipids and lipid-like molecules	脂质和类脂分子	Fatty Acyls	脂肪酰类	Fatty acids and conjugates	脂肪酸和聚合物	0.0132714	0.0171888	0.00180557	0.0107553	0.00173067	0.00243521	0.0051599	0.00310859	1.16584	0.181446	0.962514	0.28903	-1.79071
590	Dihydroxyacetone_Phosphate_Acyl_Ester	2.67	level2			199.001	64.4	POS	C4H7O7P	HMDB0011750			C03372	Organic oxygen compounds	有机含氧化合物	Organooxygen compounds	有机氧化合物	Carbonyl compounds	羰基化合物	0.275528	0.41326	0.338305	0.342364	0.275209	0.40149	0.252674	0.309791	0.565911	0.622031	0.966158	0.904858	-0.144236
591	Ethyl 4-hydroxyquinoline-2-carboxylate	2.67	level2			218.081	60.2	POS	C12H11NO3					Organoheterocyclic compounds	有机杂环化合物	Quinolines and derivatives	喹啉及衍生物	Quinolones and derivatives	喹诺酮及衍生物	0.296313	1.66662	0.00890651	0.657281	0.097888	0.287298	1.49186	0.625682	0.522168	0.964771	0.999955	0.951925	-0.0710805
592	[(7-Oxo-7H-benzo[de]anthracen-3-yl)sulfanyl]acetic acid	2.67	level2			321.059	57.7	POS	C19H12O3S					Benzenoids	苯环型化合物	Phenanthrenes and derivatives		Phenanthrenes and derivatives		0.134265	0.0980983	0.358748	0.197037	0.338026	0.323115	0.146875	0.269339	0.83759	0.51775	0.962514	1.36694	0.450954
593	13,14-Dihydroprostaglandin F1.alpha.	2.67	level2			357.263	56.7	NEG	C20H38O5					Lipids and lipid-like molecules	脂质和类脂分子	Fatty Acyls	脂肪酰类	Eicosanoids	类花生酸	0.0896292	0.0600149	0.0116503	0.0537648	0.0113255	0.0223094	0.0514171	0.0283507	0.693468	0.378401	0.962514	0.527309	-0.923279
594	9-Hydroxynonanoic acid	2.67	level2			173.118	53.2	NEG	C9H18O3					Organic acids and derivatives	有机酸及其衍生物	Hydroxy acids and derivatives	羟基酸及衍生物	Medium-chain hydroxy acids and derivatives	中链羟基酸及衍生物	0.0714439	0.0271314	0.0340754	0.0442169	0.0506372	0.0393095	0.065771	0.0519059	0.673205	0.650991	0.971188	1.17389	0.231301
595	1-(Cyclohexylmethyl)proline	2.67	level2			212.164	51.8	POS	C12H21NO2					Organic acids and derivatives	有机酸及其衍生物	Carboxylic acids and derivatives	羧酸及衍生物	Amino acids, peptides, and analogues	氨基酸、肽和类似物	0.122584	0.109864	0.141551	0.124666	0.150623	0.155491	0.162183	0.156099	1.88314	0.0326411	0.962514	1.25213	0.324387
596	Methyl indole-4-carboxylate	2.67	level2			174.055	51.1	NEG	C10H9NO2					Organoheterocyclic compounds	有机杂环化合物	Indoles and derivatives	吲哚和衍生物	Indolecarboxylic acids and derivatives		0.0453157	0.0478941	0.0291774	0.0407957	0.0327179	0.0257404	0.0387657	0.032408	1.10295	0.29466	0.962514	0.794396	-0.332069
597	2-Methyl-4-pyrimidinamine	2.67	level2			110.071	45.4	POS	C5H7N3					Organoheterocyclic compounds	有机杂环化合物	Diazines	二氮杂苯	Pyrimidines and pyrimidine derivatives	嘧啶类和嘧啶类衍生物	0.296974	2.21526e-05	0.338312	0.211769	0.149332	2.49534e-05	0.433645	0.194334	0.0747353	0.921365	0.999955	0.917668	-0.123955
598	3'-Hydroxy-3-methoxy-4,5-methylenedioxybiphenyl	2.67	level2			243.065	38.9	NEG	C14H12O4					Organoheterocyclic compounds	有机杂环化合物	Benzodioxoles	苯并二恶茂烷类	Benzodioxoles	苯并二恶茂烷类	0.0650718	0.120189	0.0791255	0.0881286	0.0753519	0.113621	0.104636	0.0978696	0.73312	0.654411	0.971763	1.11053	0.15125
599	1,2-Dilinoleoyl-sn-glycero-3-phosphoethanolamine	2.67	level2			740.519	38.3	POS	C41H74NO8P	HMDB0009093		20707-71-5		Lipids and lipid-like molecules	脂质和类脂分子	Glycerophospholipids	甘油磷脂类	Glycerophosphoethanolamines	磷脂酰乙醇胺	0.266338	2.21526e-05	0.182495	0.149618	0.15078	0.236834	0.159345	0.182319	0.895701	0.714479	0.981285	1.21856	0.285182
600	3-Cyclohexyl-2-hydroxypropanoic acid	2.67	level2			171.102	38.1	NEG	C9H16O3					Lipids and lipid-like molecules	脂质和类脂分子	Fatty Acyls	脂肪酰类	Fatty acids and conjugates	脂肪酸和聚合物	0.306384	0.13997	0.18728	0.211211	0.365692	0.232756	0.330999	0.309816	1.28932	0.195581	0.962514	1.46685	0.552723
601	Butachlor ESA	2.67	level2			356.152	29.8	NEG	C17H27NO5S					Benzenoids	苯环型化合物	Benzene and substituted derivatives	苯和取代衍生物	Anilides		0.0508652	0.0500638	0.0295369	0.0434886	0.0266895	0.0213446	0.0826599	0.0435647	0.30968	0.99726	0.99996	1.00175	0.00252006
602	Acetochlor ethanesulfonic acid	2.67	level2			314.105	23.5	NEG	C14H21NO5S					Benzenoids	苯环型化合物	Benzene and substituted derivatives	苯和取代衍生物	Anilides		0.0445981	0.0392077	0.14772	0.0771753	0.121294	0.180404	0.0609286	0.120876	1.01854	0.425964	0.962514	1.56625	0.647312
603	Aspterric acid	2.67	level2			265.143	23.4	NEG	C15H22O4					Organic acids and derivatives	有机酸及其衍生物	Hydroxy acids and derivatives	羟基酸及衍生物	Alpha hydroxy acids and derivatives	Alpha-羟基酸及衍生物	6.87516e-06	6.18187e-06	0.0421614	0.0140582	0.0396747	0.0377604	0.0430881	0.0401744	1.60379	0.202927	0.962514	2.85773	1.51487
604	1-Pyrrolidineheptanoic acid, 2-[(1E,3S,4S)-3-hydroxy-4-methyl-1-nonen-6-yn-1-yl]-5-oxo-, (2R)-	2.67	level2			362.235	18.1	NEG	C21H33NO4					Lipids and lipid-like molecules	脂质和类脂分子	Fatty Acyls	脂肪酰类	Fatty acids and conjugates	脂肪酸和聚合物	21.3065	20.148	21.5051	20.9865	18.8931	6.39171e-06	6.43614e-06	6.29771	1.68911	0.144295	0.962514	0.300083	-1.73657
605	Dodeca-2(E),4(E)-dienoic acid	2.67	level2			195.138	17.3	NEG	C12H20O2	HMDB0340679				Lipids and lipid-like molecules	脂质和类脂分子	Fatty Acyls	脂肪酰类	Fatty acids and conjugates	脂肪酸和聚合物	0.496486	0.266111	0.200339	0.320979	0.301904	0.697899	0.517192	0.505665	1.22711	0.273075	0.962514	1.57538	0.655704
606	4-Amino-2-(5-chloro-1,3-benzoxazol-2-yl)phenol	2.67	level2			259.027	16.2	NEG	C13H9ClN2O2					Organoheterocyclic compounds	有机杂环化合物	Azoles	吡咯类	Oxazoles		0.848061	0.317991	0.765906	0.643986	0.845807	0.306708	0.994327	0.715614	0.122665	0.801053	0.994125	1.11123	0.152153
607	Laurylsulfuric acid	2.67	level2			265.147	13.8	NEG	C12H26O4S					Organic acids and derivatives	有机酸及其衍生物	Organic sulfuric acids and derivatives	有机硫酸及衍生物	Sulfuric acid esters	硫酸酯	1.23561	0.968933	0.999144	1.06789	0.878419	0.87939	0.990032	0.915947	1.48378	0.174281	0.962514	0.857713	-0.221433
608	7-Chloro-8-methyl-2-(4-pyridinyl)-4-quinolinecarboxylic acid	2.67	level2			299.057	12.3	POS	C16H11ClN2O2					Organoheterocyclic compounds	有机杂环化合物	Quinolines and derivatives	喹啉及衍生物	Quinoline carboxylic acids	喹啉羧酸	0.0020542	0.00191297	0.0023154	0.00209419	0.00255403	0.00151381	0.00218804	0.00208529	0.231531	0.979581	0.999955	0.995753	-0.00614068
609	2,4-Dichloro-5-ethyl-3-methylphenol	2.67	level2			203.005	6.7	NEG	C9H10Cl2O					Benzenoids	苯环型化合物	Benzene and substituted derivatives	苯和取代衍生物	Halobenzenes		0.000324115	0.00025821	0.000328385	0.00030357	0.00315831	0.000290501	0.000223849	0.00122422	0.67748	0.441651	0.962514	4.03274	2.01176
610	Leucyl-Glycine	2.67	level2			189.123	206	POS	C8H16N2O3	HMDB0028929				Organic acids and derivatives	有机酸及其衍生物	Carboxylic acids and derivatives	羧酸及衍生物	Amino acids, peptides, and analogues	氨基酸、肽和类似物	0.0682178	0.0841798	0.053173	0.0685235	0.0526282	2.49534e-05	0.0631145	0.0385892	1.07182	0.235762	0.962514	0.563153	-0.828401
611	1,2-dihydroxyheptadec-16-en-4-yl acetate	2.67	level2			327.253	51.2	NEG	C19H36O4	HMDB0031045		59499-18-2		Lipids and lipid-like molecules	脂质和类脂分子	Fatty Acyls	脂肪酰类	Fatty alcohols	脂肪醇	0.0324477	6.18187e-06	0.0309693	0.0211411	0.028685	0.0300182	0.0225864	0.0270966	0.903251	0.611348	0.964967	1.2817	0.358061
612	Tetraglyme	2.67	level2			223.154	23.1	POS	C10H22O5	HMDB0258894				Organic oxygen compounds	有机含氧化合物	Organooxygen compounds	有机氧化合物	Ethers	醚	1.16803	0.654635	1.04048	0.954382	0.945081	0.867883	1.35908	1.05735	0.549071	0.65984	0.972304	1.10789	0.147814
613	PC(44:12)	2.67	level2			878.573	120.4	POS	C52H80NO8P											1.50158	2.21526e-05	1.25661	0.919405	1.36726	2.49534e-05	2.34116e-05	0.455769	0.867399	0.515786	0.962514	0.495721	-1.0124
614	4-Methyl-N-(4-methyl-2-pyridinyl)benzenesulfonamide	2.66	level2			261.072	247	NEG	C13H14N2O2S					Benzenoids	苯环型化合物	Benzene and substituted derivatives	苯和取代衍生物	Toluenes		0.0326516	0.0311215	0.0288058	0.0308596	0.029139	0.0259984	0.0344211	0.0298528	0.446785	0.728137	0.982584	0.967376	-0.047852
615	3',5'-Cyclic Inosine monophosphate	2.66	level2			329.029	245.7	NEG	C10H11N4O7P					Nucleosides, nucleotides, and analogues	核苷、核苷酸和类似物	Purine nucleotides	嘌呤核苷酸类	Cyclic purine nucleotides		4.7304	4.25051	4.08003	4.35365	4.14964	4.58666	4.23824	4.32485	0.155833	0.90876	0.999955	0.993385	-0.00957526
616	2,2'-(4-(2-Hydroxyethylamino)-3-nitrophenylazanediyl)diethanol	2.66	level2			286.14	242	POS	C12H19N3O5					Benzenoids	苯环型化合物	Benzene and substituted derivatives	苯和取代衍生物	Nitrobenzenes		2.38509e-05	0.285746	0.120242	0.135337	0.145184	0.06753	0.201988	0.138234	0.970645	0.976271	0.999955	1.0214	0.0305531
617	1,1-Dioxo-[1,2]thiazolo[5,4-b]pyridin-3-one	2.66	level2			182.986	218.4	NEG	C6H4N2O3S					Organoheterocyclic compounds	有机杂环化合物	Pyridines and derivatives	吡啶及衍生物	Pyridines and derivatives	吡啶及衍生物	0.0139594	0.0123383	0.0136796	0.0133258	0.0142798	0.0176353	0.0192327	0.0170492	1.81315	0.0732892	0.962514	1.27942	0.355486
618	3,4-Difluoro-L-phenylalanine	2.66	level2			200.053	206.8	NEG	C9H9F2NO2					Organic acids and derivatives	有机酸及其衍生物	Carboxylic acids and derivatives	羧酸及衍生物	Amino acids, peptides, and analogues	氨基酸、肽和类似物	0.0218568	0.0479229	0.0282493	0.0326763	0.0281253	0.0259446	0.0382593	0.0307764	0.0220064	0.838055	0.998764	0.941856	-0.0864218
619	(2S,3S)-3-Hydroxyleucine	2.66	level2			146.082	176.7	NEG	C6H13NO3					Organic acids and derivatives	有机酸及其衍生物	Carboxylic acids and derivatives	羧酸及衍生物	Amino acids, peptides, and analogues	氨基酸、肽和类似物	0.0399456	0.0542878	0.0391061	0.0444465	0.0349569	0.053911	0.0335942	0.0408207	0.525266	0.681277	0.975103	0.918423	-0.122769
620	4-Chloro-2-methyl-5-(4-morpholinyl)-3(2H)-pyridazinone	2.66	level2			230.07	164.1	POS	C9H12ClN3O2					Organic nitrogen compounds	有机含氮化合物	Organonitrogen compounds	有机氮化合物	Amines	胺	0.0622432	0.140912	0.132542	0.111899	0.108333	0.136148	0.0739687	0.10615	0.0315801	0.860795	0.999847	0.948622	-0.076095
621	Formyl-5-hydroxykynurenamine	2.66	level2			209.092	158.1	POS	C10H12N2O3	HMDB0012948		958733-17-0	C05647	Organic oxygen compounds	有机含氧化合物	Organooxygen compounds	有机氧化合物	Carbonyl compounds	羰基化合物	0.398843	2.21526e-05	0.466795	0.288553	0.498284	0.588205	0.379683	0.488724	0.978503	0.272945	0.962514	1.69371	0.760183
622	N-(2-Fluorophenyl)-N'-(4-pyridinylmethyl)urea	2.66	level2			246.103	147.8	POS	C13H12FN3O					Benzenoids	苯环型化合物	Benzene and substituted derivatives	苯和取代衍生物	N-phenylureas		0.0540613	0.0440054	0.0740007	0.0573558	0.0645511	0.0490689	0.0616002	0.0584068	0.200703	0.921444	0.999955	1.01832	0.0261954
623	Euparin	2.66	level2			215.072	135.1	NEG	C13H12O3					Organoheterocyclic compounds	有机杂环化合物	Benzofurans	苯并呋喃	Benzofurans		0.00183723	6.18187e-06	0.0192861	0.00704317	0.0188134	0.0105057	0.0105042	0.0132744	1.16861	0.407514	0.962514	1.88472	0.914353
624	4,11-Diamino-1H-naphtho[2,3-f]isoindole-1,3,5,10(2H)-tetrone	2.66	level2			306.054	123.7	NEG	C16H9N3O4					Benzenoids	苯环型化合物	Anthracenes	蒽类	Anthracenes		0.00885479	0.00250635	6.34955e-06	0.00378916	6.30815e-06	0.0247967	0.0206973	0.0151668	0.401292	0.233368	0.962514	4.00267	2.00096
625	N-(1H-Indol-3-ylacetyl)glycine	2.66	level2			231.076	111.8	NEG	C12H12N2O3	HMDB0240661		13113-08-1		Organic acids and derivatives	有机酸及其衍生物	Carboxylic acids and derivatives	羧酸及衍生物	Amino acids, peptides, and analogues	氨基酸、肽和类似物	0.0807839	0.0728592	0.0954274	0.0830235	0.0955442	0.0300673	0.078661	0.0680908	0.904358	0.510776	0.962514	0.820139	-0.286059
626	Ethoxyacetic acid	2.66	level2			103.04	101.9	NEG	C4H8O3	HMDB0031212		627-03-2		Organic acids and derivatives	有机酸及其衍生物	Carboxylic acids and derivatives	羧酸及衍生物	Carboxylic acids	羧酸	2.83382	1.87733	2.34583	2.35233	2.26591	6.39171e-06	1.46422	1.24338	1.07897	0.197623	0.962514	0.528574	-0.919823
627	(3-Amino-6-hydroxy-4-methylthieno[2,3-b]pyridin-2-yl)(phenyl)methanone	2.66	level2			285.071	72	POS	C15H12N2O2S					Organic oxygen compounds	有机含氧化合物	Organooxygen compounds	有机氧化合物	Carbonyl compounds	羰基化合物	0.204434	0.0814928	0.262467	0.182798	0.227576	0.220578	0.195751	0.214635	0.741485	0.588608	0.963001	1.17417	0.231636
628	2-Ethyl 4-methyl 3,5-dimethyl-1H-pyrrole-2,4-dicarboxylate	2.66	level2			224.092	50.5	NEG	C11H15NO4					Organoheterocyclic compounds	有机杂环化合物	Pyrroles	吡咯	Pyrrole carboxylic acids and derivatives	吡咯羧酸及衍生物	0.0339891	6.18187e-06	0.0325919	0.0221957	0.0315159	0.0197051	0.0609617	0.0373942	0.9572	0.410277	0.962514	1.68475	0.752534
629	.DELTA.17-6-Ketoprostaglandin F1.alpha.	2.66	level2			367.214	25.2	NEG	C20H32O6					Lipids and lipid-like molecules	脂质和类脂分子	Fatty Acyls	脂肪酰类	Eicosanoids	类花生酸	0.216236	0.178237	0.284308	0.22626	0.272743	0.147238	0.182206	0.200729	0.726426	0.627065	0.967169	0.88716	-0.172734
630	6-Fluoro-2-(trifluoromethyl)-4-quinolinol	2.66	level2			230.025	23.1	NEG	C10H5F4NO					Organoheterocyclic compounds	有机杂环化合物	Quinolines and derivatives	喹啉及衍生物	Quinolones and derivatives	喹诺酮及衍生物	0.0110184	0.0117057	0.015975	0.0128997	0.014351	6.39171e-06	0.0125619	0.00897309	1.01067	0.456812	0.962514	0.695604	-0.523661
631	Lasiodiplodin	2.66	level2			291.162	17.3	NEG	C17H24O4					Phenylpropanoids and polyketides	苯丙素类和聚酮类	Macrolides and analogues		Macrolides and analogues		0.025719	0.0295761	0.0364639	0.0305863	0.0672241	0.0802321	0.031437	0.0596311	1.52518	0.123484	0.962514	1.9496	0.963177
632	N,N-Dimethyl-N-(2-phenoxyethyl)-1-dodecanaminium cation	2.66	level2			334.31	16.6	POS	C22H40NO					Benzenoids	苯环型化合物	Phenol ethers	酚醚类	Phenol ethers		1.61657	1.76878	1.98432	1.78989	1.99149	2.2314	1.6253	1.94939	0.751943	0.481989	0.962514	1.08911	0.123155
633	Canrenone	2.66	level2			339.198	14.8	NEG	C22H28O3	HMDB0003033		976-71-6		Lipids and lipid-like molecules	脂质和类脂分子	Steroids and steroid derivatives	甾类和甾类衍生物	Steroid lactones	甾体内酯	2.55036	2.77608	2.59239	2.63961	2.43399	2.58113	2.35808	2.45774	1.52451	0.129102	0.962514	0.931098	-0.102995
634	Decarbamoylsaxitoxin	2.66	level2			257.136	291.1	POS	C9H16N6O3	HMDB0038319		58911-04-9		Phenylpropanoids and polyketides	苯丙素类和聚酮类	Saxitoxins, gonyautoxins, and derivatives		Saxitoxins, gonyautoxins, and derivatives		0.036001	0.0574054	0.0465738	0.0466601	0.0455384	0.0546018	0.0449808	0.0483737	0.457908	0.816647	0.997125	1.03672	0.0520332
635	Flurtamone	2.66	level2			332.089	217.5	NEG	C18H14F3NO2	HMDB0252414				Benzenoids	苯环型化合物	Benzene and substituted derivatives	苯和取代衍生物	Trifluoromethylbenzenes		0.00571819	0.00842795	0.00233362	0.00549325	0.00215118	0.00242253	0.00648103	0.00368491	0.744125	0.466854	0.962514	0.670807	-0.57603
636	(S)-3,4-Dihydroxybutyric acid (lithium hydrate)	2.66	level2			119.034	190	NEG	C4H8O4	HMDB0000337	3，4 -二羟基丁酸	51267-44-8		Organic acids and derivatives	有机酸及其衍生物	Hydroxy acids and derivatives	羟基酸及衍生物	Beta hydroxy acids and derivatives	Beta-羟基酸及衍生物	0.0282114	0.0276126	0.0313337	0.0290526	0.0287462	0.0321495	0.0328827	0.0312595	1.31615	0.268499	0.962514	1.07596	0.10563
637	DL-m-Tyrosine	2.66	level2			180.066	181.4	NEG	C9H11NO3		DL-m-酪氨酸	775-06-4		Organic acids and derivatives	有机酸及其衍生物	Carboxylic acids and derivatives	羧酸及衍生物	Amino acids, peptides, and analogues	氨基酸、肽和类似物	0.109237	6.18187e-06	0.11352	0.0742544	0.116046	0.129717	0.110689	0.118817	0.969428	0.352798	0.962514	1.60013	0.678193
638	PC(42:11)	2.66	level2			852.558	121.4	POS	C50H78NO8P											0.882804	2.21526e-05	0.516686	0.466504	0.615643	0.197759	0.368189	0.393864	0.779291	0.810317	0.995773	0.844288	-0.244194
639	1-(Bromoethynyl)cyclohexanol	2.65	level2			203.006	263.2	POS	C8H11BrO					Organic oxygen compounds	有机含氧化合物	Organooxygen compounds	有机氧化合物	Alcohols and polyols		0.199662	0.154509	0.203854	0.186008	0.189183	0.237357	0.192894	0.206478	0.93574	0.407021	0.962514	1.11005	0.150623
640	2-Hydroxy-1,3-dimethyl-9H-thioxanthen-9-one	2.65	level2			257.062	261.7	POS	C15H12O2S					Organoheterocyclic compounds	有机杂环化合物	Thiochromenes		Thiochromenes		0.1582	0.135382	0.186298	0.15996	0.160477	0.179653	0.17236	0.17083	0.819904	0.528037	0.962514	1.06795	0.0948492
641	Rhamnetin	2.65	level2			317.064	250.4	POS	C16H12O7					Phenylpropanoids and polyketides	苯丙素类和聚酮类	Flavonoids	黄酮类	Flavones	黄酮	5.99007	3.39763	7.56564	5.65111	7.77811	5.64441	2.97502	5.46585	0.287482	0.924877	0.999955	0.967216	-0.04809
642	1-[4-(4-Quinazolinylamino)phenyl]ethanone	2.65	level2			264.115	239.4	POS	C16H13N3O					Organic oxygen compounds	有机含氧化合物	Organooxygen compounds	有机氧化合物	Carbonyl compounds	羰基化合物	0.00277127	0.00132514	0.0026714	0.00225594	0.00238076	0.00437665	0.00187998	0.00287913	0.662726	0.524074	0.962514	1.27625	0.351905
643	DL-Threonine methyl ester	2.65	level2			134.081	233.4	POS	C5H11NO3	HMDB0341314				Organic acids and derivatives	有机酸及其衍生物	Carboxylic acids and derivatives	羧酸及衍生物	Amino acids, peptides, and analogues	氨基酸、肽和类似物	0.0684714	2.21526e-05	0.0778124	0.0487686	0.0680597	0.0855103	0.0895979	0.0810559	0.987737	0.272497	0.962514	1.66205	0.732964
644	6-Fluoro-2-(pyridin-2-yl)-1H-1,3-benzodiazole	2.65	level2			212.064	205	NEG	C12H8FN3					Organoheterocyclic compounds	有机杂环化合物	Benzimidazoles		Benzimidazoles		0.0067032	0.00873849	0.00350229	0.00631466	0.00353973	0.00890275	0.00529059	0.00591102	0.14962	0.863012	0.999955	0.936079	-0.0952974
645	4-Bromo-2,6-di-tert-butylphenol	2.65	level2			283.069	181.9	NEG	C14H21BrO					Benzenoids	苯环型化合物	Benzene and substituted derivatives	苯和取代衍生物	Phenylpropanes	苯丙烷	0.00274206	6.18187e-06	0.00266702	0.00180509	0.00272652	0.00278966	0.00289613	0.0028041	0.969028	0.382438	0.962514	1.55344	0.635471
646	N-(1,3-Benzothiazol-2-yl)-N-(4-fluorophenyl)amine	2.65	level2			245.053	171.9	POS	C13H9FN2S					Organoheterocyclic compounds	有机杂环化合物	Benzothiazoles		Benzothiazoles		0.00607689	0.00974128	0.0318295	0.0158826	0.0036229	0.0132296	0.014273	0.0103752	0.402484	0.562313	0.962514	0.653244	-0.614307
647	6-Chloro-5-fluoro-1H-1,3-benzodiazol-2-amine	2.65	level2			184.009	171.1	NEG	C7H5ClFN3					Organoheterocyclic compounds	有机杂环化合物	Benzimidazoles		Benzimidazoles		0.0403438	0.0190489	0.0213394	0.0269107	0.0282549	0.026019	0.0324411	0.028905	0.484338	0.790052	0.992348	1.07411	0.10314
648	2-(Trifluoromethyl)-1H-benzimidazol-5-amine	2.65	level2			202.06	169.6	POS	C8H6F3N3					Organoheterocyclic compounds	有机杂环化合物	Benzimidazoles		Benzimidazoles		0.139992	0.0480562	0.00952845	0.0658587	0.00976415	0.888214	0.402357	0.433445	0.936202	0.283707	0.962514	6.58144	2.7184
649	2,2-Dimethylsuccinic acid	2.65	level2			145.05	131.5	NEG	C6H10O4	HMDB0002074		597-43-3		Lipids and lipid-like molecules	脂质和类脂分子	Fatty Acyls	脂肪酰类	Fatty acids and conjugates	脂肪酸和聚合物	0.0143041	0.00691351	0.0169421	0.0127199	0.0112034	0.0163726	0.0113055	0.0129605	0.24695	0.947789	0.999955	1.01891	0.027033
650	2-Carbamoylpyridine-3-carboxylic acid	2.65	level2			165.03	130.3	NEG	C7H6N2O3					Organoheterocyclic compounds	有机杂环化合物	Pyridines and derivatives	吡啶及衍生物	Pyridinecarboxylic acids and derivatives	吡啶羧酸及衍生物	0.00112194	0.00133202	0.00106017	0.00117138	0.000968894	0.00128752	6.43614e-06	0.000754283	1.11004	0.349209	0.962514	0.643928	-0.635028
651	Aristolactam	2.65	level2			294.074	124.4	POS	C17H11NO4					Alkaloids and derivatives	生物碱和衍生物	Aristolactams		Aristolactams		0.0299043	0.0037234	2.35453e-05	0.0112171	2.38091e-05	0.0859401	0.0659244	0.0506294	0.49076	0.226558	0.962514	4.51361	2.17428
652	1-Hydroxy-2-naphthoic acid	2.65	level2			187.041	124.1	NEG	C11H8O3	HMDB0243892			C03203	Benzenoids	苯环型化合物	Naphthalenes	萘类	Naphthalenecarboxylic acids and derivatives		2.91673	2.28048	3.14971	2.78231	3.34209	3.14849	2.29179	2.92746	0.225043	0.74373	0.98473	1.05217	0.0733669
653	(Isobutylamino)(oxo)acetic acid	2.65	level2			144.066	122.3	NEG	C6H11NO3					Organic acids and derivatives	有机酸及其衍生物	Carboxylic acids and derivatives	羧酸及衍生物	Amino acids, peptides, and analogues	氨基酸、肽和类似物	0.0149481	6.18187e-06	0.0229941	0.0126495	0.0161644	0.012156	0.0166535	0.0149913	0.8867	0.750826	0.98528	1.18513	0.245049
654	5-Methyl-2-oxo-1,3-oxazolidine-4-carboxylic acid	2.65	level2			144.03	117.9	NEG	C5H7NO4					Organic acids and derivatives	有机酸及其衍生物	Carboxylic acids and derivatives	羧酸及衍生物	Amino acids, peptides, and analogues	氨基酸、肽和类似物	0.0700887	0.0597828	0.0761916	0.0686877	0.0765962	0.0451814	0.0673163	0.0630313	0.711645	0.617915	0.965579	0.91765	-0.123983
655	[2-[docosa-7.10.13.16-tetraenoyloxy]-3-(octadecanoyloxy)propoxy]({[2.3.4.5.6-pentahydroxycyclohexyl]oxy})phosphinic acid	2.65	level2			913.575	116.7	NEG	C49H87O13P	HMDB0009818				Lipids and lipid-like molecules	脂质和类脂分子	Glycerophospholipids	甘油磷脂类	Glycerophosphoinositols	甘油磷酸肌醇	0.0590906	0.0761786	0.0684052	0.0678914	0.0752057	0.0511452	0.0358826	0.0540778	1.23428	0.329967	0.962514	0.796534	-0.328192
656	N-Acetyl-D-galactosamine 4-sulfate	2.65	level2			300.038	102.8	NEG	C8H15NO9S					Organic oxygen compounds	有机含氧化合物	Organooxygen compounds	有机氧化合物	Carbohydrates and carbohydrate conjugates	碳水化合物和碳水化合物结合物	0.102351	0.0668592	0.082021	0.0837439	0.0852117	0.0601793	0.0800137	0.0751349	0.778681	0.538126	0.962514	0.897199	-0.1565
657	3-(2-Ethylhexoxy)propan-1-amine	2.65	level2			188.201	47.1	POS	C11H25NO					Organic oxygen compounds	有机含氧化合物	Organooxygen compounds	有机氧化合物	Ethers	醚	0.00686568	0.00539151	0.0665498	0.026269	0.0672112	2.49534e-05	0.00821917	0.0251518	0.783039	0.97133	0.999955	0.95747	-0.0627003
658	2-(1-Hydroxycyclohexyl)butanoic acid	2.65	level2			185.118	29.1	NEG	C10H18O3					Organic oxygen compounds	有机含氧化合物	Organooxygen compounds	有机氧化合物	Alcohols and polyols		0.184508	6.18187e-06	0.217703	0.134073	0.202096	0.161088	0.176003	0.179729	0.926146	0.543049	0.962514	1.34053	0.422809
659	2-Hexylpentanedioic acid	2.65	level2			215.128	25.1	NEG	C11H20O4					Lipids and lipid-like molecules	脂质和类脂分子	Fatty Acyls	脂肪酰类	Fatty acids and conjugates	脂肪酸和聚合物	0.274953	0.188427	0.462907	0.308762	0.504419	0.0613141	0.277347	0.281027	0.609934	0.863577	0.999955	0.910171	-0.13579
660	Octamethylcyclotetrasiloxane	2.65	level2			297.082	16.1	POS	C8H24O4Si4											0.182366	0.157912	0.191181	0.177153	0.185762	0.205917	0.121117	0.170932	0.460972	0.831796	0.99863	0.964883	-0.0515736
661	4,4'-Sulfonylbisphenol	2.65	level2			249.022	13.2	NEG	C12H10O4S	HMDB0240712			C14216	Benzenoids	苯环型化合物	Benzene and substituted derivatives	苯和取代衍生物	Benzenesulfonyl compounds		0.315183	0.322756	0.360657	0.332865	0.31163	6.39171e-06	0.407524	0.23972	1.00973	0.528616	0.962514	0.720172	-0.473587
662	[2-(Trifluoromethyl)-1,3-thiazol-4-yl]methanol	2.65	level2			184.003	9	POS	C5H4F3NOS					Organoheterocyclic compounds	有机杂环化合物	Azoles	吡咯类	Thiazoles		0.0592557	0.0776753	0.0668863	0.0679391	0.0550939	0.0705858	0.0582762	0.0613186	0.855488	0.405803	0.962514	0.902553	-0.147917
663	3-Ureidoisobutyric acid	2.65	level2			147.077	303.4	POS	C5H10N2O3	HMDB0304156			C05100	Organic acids and derivatives	有机酸及其衍生物	Organic carbonic acids and derivatives		Ureas		0.90943	1.17188	0.763656	0.948321	0.893483	1.1746	0.890749	0.986278	0.357788	0.815219	0.996848	1.04002	0.0566179
664	Beta-Ecdysterone	2.65	level2			481.312	120.4	POS	C27H44O7	HMDB0030180		5289-74-7		Lipids and lipid-like molecules	脂质和类脂分子	Steroids and steroid derivatives	甾类和甾类衍生物	Bile acids, alcohols and derivatives	胆汁酸类、醇类及其衍生物	0.662497	0.944813	0.410585	0.672632	0.495411	0.254909	0.907829	0.552716	0.62487	0.650494	0.970861	0.821722	-0.283278
665	4-Acetamidophenol sulfate	2.65	level2			230.012	16.6	NEG	C8H9NO5S	HMDB0059911		10066-90-7		Organic acids and derivatives	有机酸及其衍生物	Organic sulfuric acids and derivatives	有机硫酸及衍生物	Arylsulfates	芳基硫酸酯	0.433958	0.185976	0.49403	0.371321	0.477118	0.176503	0.743722	0.465781	0.304538	0.643519	0.970352	1.25439	0.326983
666	3-Aminopiperidine-2,6-dione	2.65	level2			127.051	203.6	NEG	C5H8N2O2	HMDB0242134	3 -氨基哌啶- 2，6 -二酮	2353-44-8		Organic acids and derivatives	有机酸及其衍生物	Carboxylic acids and derivatives	羧酸及衍生物	Amino acids, peptides, and analogues	氨基酸、肽和类似物	0.133093	0.122622	0.145442	0.133719	0.155952	0.142416	0.148358	0.148909	1.5234	0.118769	0.962514	1.11359	0.155223
667	6-(2-Pyridinyl)-1,3,5-triazine-2,4-diamine	2.64	level2			189.087	305	POS	C8H8N6					Organoheterocyclic compounds	有机杂环化合物	Triazines		Aminotriazines		0.359367	0.190435	0.265998	0.271933	0.482683	2.49534e-05	0.495713	0.32614	0.873992	0.766131	0.988251	1.19934	0.262239
668	Erlose	2.64	level2			503.16	256.8	NEG	C18H32O16					Organic oxygen compounds	有机含氧化合物	Organooxygen compounds	有机氧化合物	Carbohydrates and carbohydrate conjugates	碳水化合物和碳水化合物结合物	0.032195	0.0103807	0.0386	0.0270586	0.0179089	0.0401236	0.0260191	0.0280172	0.306783	0.93309	0.999955	1.03543	0.0502272
669	{[5-(Carboxymethoxy)-4-oxo-2-phenyl-4H-chromen-7-yl]oxy}acetic acid	2.64	level2			371.075	255.8	POS	C19H14O8					Phenylpropanoids and polyketides	苯丙素类和聚酮类	Flavonoids	黄酮类	Flavones	黄酮	0.566827	0.626106	0.633777	0.608903	0.579076	0.657001	0.576763	0.60428	0.080246	0.897832	0.999955	0.992407	-0.0109955
670	Moxonidine	2.64	level2			242.079	237.5	POS	C9H12ClN5O	HMDB0041938		75438-57-2	C07451	Organoheterocyclic compounds	有机杂环化合物	Diazines	二氮杂苯	Pyrimidines and pyrimidine derivatives	嘧啶类和嘧啶类衍生物	0.0970001	0.080024	0.0729266	0.0833169	0.0719667	0.0792411	0.0809276	0.0773785	0.799474	0.48108	0.962514	0.928725	-0.106677
671	5-(2-Fluorobenzyl)-1,3-thiazol-2-amine	2.64	level2			209.053	222.7	POS	C10H9FN2S					Organoheterocyclic compounds	有机杂环化合物	Azoles	吡咯类	Thiazoles		0.427692	0.342679	0.387775	0.386049	2.38091e-05	0.424613	2.34116e-05	0.141553	1.54042	0.163953	0.962514	0.366672	-1.44744
672	Valyl-Glycine	2.64	level2			175.108	211.2	POS	C7H14N2O3	HMDB0259740				Organic acids and derivatives	有机酸及其衍生物	Carboxylic acids and derivatives	羧酸及衍生物	Amino acids, peptides, and analogues	氨基酸、肽和类似物	1.06867	1.24608	0.819289	1.04468	0.802514	0.144499	0.501595	0.482869	1.57276	0.0685184	0.962514	0.462217	-1.11336
673	D-myo-Inositol, 1-[2-hydroxy-3-[(1-oxo-9,12-octadecadienyl)oxy]propyl hydrogen phosphate], [S-(Z,Z)]-	2.64	level2			595.287	158.4	NEG	C27H49O12P											0.0203424	0.0280641	0.00982976	0.0194121	0.0099908	0.00458598	0.0227331	0.0124366	0.979368	0.407302	0.962514	0.640665	-0.642359
674	Hydroxymetronidazole	2.64	level2			188.066	123.1	POS	C6H9N3O4	HMDB0246690				Organoheterocyclic compounds	有机杂环化合物	Azoles	吡咯类	Imidazoles	咪唑	0.0329253	0.0243217	0.023098	0.0267817	0.0234684	0.0346235	0.0214956	0.0265292	0.16625	0.963065	0.999955	0.990571	-0.0136671
675	[2-(hexadecanoyloxy)-3-[octadec-11-enoyloxy]propoxy]({[2.3.4.5.6-pentahydroxycyclohexyl]oxy})phosphinic acid	2.64	level2			835.529	120.8	NEG	C43H81O13P	HMDB0009822				Lipids and lipid-like molecules	脂质和类脂分子	Glycerophospholipids	甘油磷脂类	Glycerophosphoinositols	甘油磷酸肌醇	0.298843	6.18187e-06	0.160984	0.153278	0.172519	0.0381162	0.156816	0.122484	0.746606	0.76494	0.988181	0.799095	-0.323561
676	3,5,9-Trioxa-4-phosphatetracosan-1-aminium, 7-(acetyloxy)-24-carboxy-4-hydroxy-N,N,N-trimethyl-, inner salt, 4-oxide, (R)-	2.64	level2			552.329	110	NEG	C26H52NO9P					Lipids and lipid-like molecules	脂质和类脂分子	Glycerophospholipids	甘油磷脂类	Glycerophosphocholines	甘油磷酸胆碱	0.0485696	0.076917	0.0445463	0.0566776	0.0464076	0.047788	0.0702352	0.0548102	0.012341	0.890918	0.999955	0.967052	-0.0483346
677	Hexadecanedioic acid, 3,3,14,14-tetramethyl-	2.64	level2			341.268	48.6	NEG	C20H38O4	HMDB0254402				Lipids and lipid-like molecules	脂质和类脂分子	Fatty Acyls	脂肪酰类	Fatty acids and conjugates	脂肪酸和聚合物	0.0543864	6.18187e-06	0.0497245	0.0347057	0.0499549	0.0443862	6.43614e-06	0.0314492	0.128713	0.896511	0.999955	0.906167	-0.142151
678	5-(2-Fluorophenyl)-5-methylimidazolidine-2,4-dione	2.64	level2			207.059	47.3	NEG	C10H9FN2O2					Organoheterocyclic compounds	有机杂环化合物	Azolidines	氮杂环戊烷	Imidazolidines		0.0139878	0.0632219	0.00584332	0.0276843	0.0064746	0.0145659	0.0751973	0.0320793	0.228846	0.88343	0.999955	1.15875	0.212571
679	2-Dodecylbenzenesulfonic_acid	2.64	level2			327.201	29.9	POS	C18H30O3S	HMDB0031031				Benzenoids	苯环型化合物	Benzene and substituted derivatives	苯和取代衍生物	Benzenesulfonic acids and derivatives		12.6805	11.6492	12.2956	12.2084	13.5164	13.5985	2.34116e-05	9.03831	1.07963	0.555875	0.962514	0.740334	-0.433752
680	8-Hydroxy-3-(7-hydroxyheptyl)-6-oxo-3,4-dihydroisochromene-7-carboxylic acid	2.64	level2			321.136	27.6	NEG	C17H22O6					Organoheterocyclic compounds	有机杂环化合物	Benzopyrans	苯并吡喃	Benzopyrans		0.0980343	0.00480099	0.122467	0.0751007	0.107795	0.0259102	0.133733	0.0891461	0.531585	0.786022	0.991625	1.18702	0.247345
681	3-[5-(4-Pyridinyl)-4H-1,2,4-triazol-3-yl]pyridine	2.64	level2			222.08	27.5	NEG	C12H9N5					Organoheterocyclic compounds	有机杂环化合物	Pyridines and derivatives	吡啶及衍生物	Pyridyltriazoles		0.0384792	0.0192956	6.34955e-06	0.0192604	6.30815e-06	0.0318978	0.0287483	0.0202175	0.0862486	0.952321	0.999955	1.04969	0.0699686
682	20-Hydroxyleukotriene B4	2.64	level2			351.219	22.9	NEG	C20H32O5					Lipids and lipid-like molecules	脂质和类脂分子	Fatty Acyls	脂肪酰类	Eicosanoids	类花生酸	0.173003	0.172064	6.34955e-06	0.115024	0.20191	0.170757	0.180323	0.18433	0.967495	0.299869	0.962514	1.60253	0.680352
683	4-Hydroxy-3-[1-(5-hydroxy-2,6,6-trimethyltetrahydro-2H-pyran-2-yl)ethyl]-2(1H)-quinolinone	2.64	level2			330.173	19.4	NEG	C19H25NO4					Organoheterocyclic compounds	有机杂环化合物	Quinolines and derivatives	喹啉及衍生物	Quinolones and derivatives	喹诺酮及衍生物	0.0829474	0.111065	0.392762	0.195591	0.380885	0.36411	0.163217	0.302737	1.07708	0.426398	0.962514	1.54781	0.630225
684	5-Nitro-2-(2-pyridinyl)-1H-benzimidazole	2.64	level2			239.059	16.5	NEG	C12H8N4O2					Organoheterocyclic compounds	有机杂环化合物	Benzimidazoles		Benzimidazoles		1.18641	1.02179	1.04886	1.08569	0.820405	1.13737	1.13616	1.03131	0.458044	0.666609	0.973088	0.949917	-0.0741268
685	Triptophenolide	2.64	level2			311.167	15.1	NEG	C20H24O3					Lipids and lipid-like molecules	脂质和类脂分子	Steroids and steroid derivatives	甾类和甾类衍生物	Oxosteroids		3.29132	3.791	3.35943	3.48058	3.00182	3.22575	3.029	3.08552	1.66438	0.0827641	0.962514	0.886496	-0.173814
686	Aspulvinone E	2.64	level2			295.063	13.6	NEG	C17H12O5					Benzenoids	苯环型化合物	Phenols	酚类	1-hydroxy-2-unsubstituted benzenoids	1-羟基-2-未取代苯环类化合物	0.524928	6.18187e-06	0.5575	0.360811	0.583125	0.48818	0.708434	0.593246	0.972311	0.291769	0.962514	1.6442	0.717388
687	Triadimefon	2.64	level2			294.101	253.8	POS	C14H16ClN3O2	HMDB0259142			C11156	Benzenoids	苯环型化合物	Phenol ethers	酚醚类	Phenol ethers		14.8107	2.21526e-05	10.2051	8.3386	10.5543	2.49534e-05	12.6101	7.72149	0.0598218	0.921278	0.999955	0.925993	-0.110927
688	Thiamphenicol	2.64	level2			353.999	237.4	NEG	C12H15Cl2NO5S	HMDB0258972				Benzenoids	苯环型化合物	Benzene and substituted derivatives	苯和取代衍生物	Benzenesulfonyl compounds		6.87516e-06	0.015464	0.0164144	0.0106284	0.0160672	6.39171e-06	0.0167199	0.0109312	0.0412215	0.970236	0.999955	1.02848	0.0405183
689	Fagomine	2.64	level2			148.097	172.7	POS	C6H13NO3	HMDB0033453		53185-12-9	C10144	Organoheterocyclic compounds	有机杂环化合物	Piperidines	哌啶	Piperidines	哌啶	0.325198	0.542353	0.381698	0.416416	0.534934	0.181269	0.253044	0.323082	1.0342	0.500031	0.962514	0.775863	-0.366125
690	LPC(18:3)	2.64	level2			518.322	114.3	POS	C26H48NO7P	HMDB0010387	十八碳三烯酰甘油磷酸胆碱			Lipids and lipid-like molecules	脂质和类脂分子	Glycerophospholipids	甘油磷脂类	Glycerophosphocholines	甘油磷酸胆碱	2.62617	3.30189	2.37923	2.7691	2.35022	2.49534e-05	2.89256	1.7476	1.03618	0.333506	0.962514	0.631109	-0.664038
691	PC(33:0)	2.64	level2			748.58	37.4	POS	C41H82NO8P											0.49274	0.481104	0.376787	0.45021	0.416581	0.301828	0.474073	0.397494	0.889845	0.447328	0.962514	0.882907	-0.179666
692	(4-Oxo-1,2,3-benzotriazin-3(4H)-yl)acetic acid	2.63	level2			206.055	271.1	POS	C9H7N3O3					Organic acids and derivatives	有机酸及其衍生物	Carboxylic acids and derivatives	羧酸及衍生物	Amino acids, peptides, and analogues	氨基酸、肽和类似物	0.0573016	0.0515597	0.0328796	0.047247	0.0339815	0.0473382	0.0450479	0.0421225	0.511952	0.576844	0.962912	0.89154	-0.165629
693	(.+/-.)-Nuarimol	2.63	level2			315.067	250.3	POS	C17H12ClFN2O					Benzenoids	苯环型化合物	Benzene and substituted derivatives	苯和取代衍生物	Diphenylmethanes		45.7188	26.4404	57.7255	43.2949	60.6408	42.5614	20.9509	41.3844	0.368029	0.902544	0.999955	0.955872	-0.0651104
694	Ala-His	2.63	level2			227.114	242.6	POS	C9H14N4O3					Organic acids and derivatives	有机酸及其衍生物	Carboxylic acids and derivatives	羧酸及衍生物	Amino acids, peptides, and analogues	氨基酸、肽和类似物	4.57001	7.76185	5.9717	6.10119	5.48213	7.52134	5.93825	6.31391	0.403948	0.857525	0.999531	1.03487	0.0494427
695	Propachlor ESA	2.63	level2			256.067	184.1	NEG	C11H15NO4S					Benzenoids	苯环型化合物	Benzene and substituted derivatives	苯和取代衍生物	Anilides		0.0116167	0.0168494	0.0101947	0.0128869	0.00865322	0.00735409	0.0123957	0.00946768	1.24175	0.247202	0.962514	0.734674	-0.444824
696	2-Methylbutyryl-L-carnitine	2.63	level2			246.17	146.8	POS	C12H23NO4					Lipids and lipid-like molecules	脂质和类脂分子	Fatty Acyls	脂肪酰类	Fatty acid esters	脂肪酸酯	0.953675	1.11732	1.02176	1.03092	1.03635	2.49534e-05	0.636058	0.557478	1.08543	0.255549	0.962514	0.54076	-0.886939
697	Methyl 1-hydroxy-2-naphthoate	2.63	level2			201.057	134.7	NEG	C12H10O3					Benzenoids	苯环型化合物	Naphthalenes	萘类	Naphthalenecarboxylic acids and derivatives		0.0986581	0.129927	0.10899	0.112525	0.112693	0.0772815	0.0650678	0.085014	1.50562	0.180649	0.962514	0.755512	-0.404473
698	1-O-Octadecyl-sn-glyceryl-3-phosphorylcholine	2.63	level2			510.39	119.2	POS	C26H56NO6P	HMDB0011149		74430-89-0	C04317	Lipids and lipid-like molecules	脂质和类脂分子	Glycerophospholipids	甘油磷脂类	Glycerophosphocholines	甘油磷酸胆碱	1.07982	1.09283	0.833938	1.00219	0.970365	1.08261	2.34116e-05	0.684334	1.09126	0.419819	0.962514	0.682836	-0.550389
699	3-Methylhippuric acid	2.63	level2			192.066	102	NEG	C10H11NO3	HMDB0013245				Organic acids and derivatives	有机酸及其衍生物	Carboxylic acids and derivatives	羧酸及衍生物	Amino acids, peptides, and analogues	氨基酸、肽和类似物	0.238681	0.212581	0.892978	0.44808	0.896418	0.784052	0.696984	0.792484	1.45879	0.208542	0.962514	1.76862	0.822626
700	1-(2-Hydroxyphenyl)-4,4,6-trimethyl-3,4-dihydro-2(1H)-pyrimidinethione	2.63	level2			249.107	72	POS	C13H16N2OS					Benzenoids	苯环型化合物	Benzene and substituted derivatives	苯和取代衍生物	N-phenylthioureas		0.511213	0.270776	0.63871	0.473566	0.645992	0.653143	0.52914	0.609425	1.07347	0.303309	0.962514	1.28688	0.363882
701	Kifunensine	2.63	level2			233.078	26.9	POS	C8H12N2O6					Organic acids and derivatives	有机酸及其衍生物	Carboxylic acids and derivatives	羧酸及衍生物	Amino acids, peptides, and analogues	氨基酸、肽和类似物	2.29044	2.02489	2.53268	2.28267	2.45092	2.43191	2.64216	2.50833	1.30521	0.234314	0.962514	1.09886	0.136007
702	Farrerol	2.63	level2			299.095	13.5	NEG	C17H16O5					Phenylpropanoids and polyketides	苯丙素类和聚酮类	Flavonoids	黄酮类	Flavans		0.192399	0.175925	0.26547	0.211265	0.256698	0.0929007	0.142775	0.164125	1.09043	0.445332	0.962514	0.776866	-0.364262
703	Tetrahydro-2,3,4,5-furantetracarboxylic acid	2.63	level2			247.009	13.2	NEG	C8H8O9					Organic acids and derivatives	有机酸及其衍生物	Carboxylic acids and derivatives	羧酸及衍生物	Tetracarboxylic acids and derivatives		0.138847	0.167218	0.174278	0.160114	0.138302	0.0384524	0.106795	0.0945164	1.45361	0.10491	0.962514	0.590307	-0.760463
704	6-Hydroxy-3-(4-methoxyphenyl)-4-methylcoumarin	2.63	level2			281.084	13.1	NEG	C17H14O4					Phenylpropanoids and polyketides	苯丙素类和聚酮类	Isoflavonoids		Hydroxyisoflavonoids		0.15253	6.18187e-06	0.172574	0.10837	0.186572	0.182102	0.162908	0.177194	0.973677	0.333436	0.962514	1.63509	0.709367
705	Genkwanin	2.63	level2			283.063	13.1	NEG	C16H12O5	HMDB0252684			C10046	Phenylpropanoids and polyketides	苯丙素类和聚酮类	Flavonoids	黄酮类	O-methylated flavonoids		6.87516e-06	1.0033	0.771972	0.591759	0.768963	0.774695	0.717378	0.753678	1.05102	0.64707	0.970838	1.27362	0.348939
706	1-(2,4-Dihydroxyphenyl)-2-(3,5-dimethoxyphenyl)propan-1-one	2.63	level2			301.11	13.1	NEG	C17H18O5					Phenylpropanoids and polyketides	苯丙素类和聚酮类	Alpha-methyldeoxybenzoin flavonoids		Alpha-methyldeoxybenzoin flavonoids		31.5709	22.4528	38.217	30.7469	37.2404	17.7399	18.561	24.5138	1.05347	0.47097	0.962514	0.797277	-0.326847
707	Purpurin	2.63	level2			255.032	13	NEG	C14H8O5	HMDB0256928			C10395	Benzenoids	苯环型化合物	Anthracenes	蒽类	Anthraquinones	蒽醌	0.0285956	0.0439548	0.0247474	0.0324326	0.0267589	6.39171e-06	0.0220367	0.0162673	1.1005	0.185378	0.962514	0.501573	-0.995468
708	Isorhodoptilometrin	2.63	level2			313.074	12.8	NEG	C17H14O6					Benzenoids	苯环型化合物	Anthracenes	蒽类	Anthraquinones	蒽醌	6.87516e-06	0.108573	0.160961	0.0898471	0.117024	0.0542976	0.0673453	0.0795557	0.931864	0.850228	0.999442	0.885457	-0.175507
709	LysoPC(0:0/18:0)	2.63	level2			562.326	113.8	POS	C26H54NO7P	HMDB0011128		4421-58-3		Lipids and lipid-like molecules	脂质和类脂分子	Glycerophospholipids	甘油磷脂类	Glycerophosphocholines	甘油磷酸胆碱	5.14664	4.52197	5.11419	4.9276	5.61551	7.07742	2.86327	5.1854	0.150857	0.846909	0.999293	1.05232	0.0735708
710	Cucurbitin	2.62	level2			131.082	285.4	POS	C5H10N2O2	HMDB0302581				Organic acids and derivatives	有机酸及其衍生物	Carboxylic acids and derivatives	羧酸及衍生物	Amino acids, peptides, and analogues	氨基酸、肽和类似物	0.782544	0.401716	1.02642	0.736892	2.38091e-05	0.880323	1.78861	0.889653	0.717367	0.79403	0.992722	1.2073	0.271789
711	5-Amino-1-(2-pyrimidinyl)-1H-pyrazole-4-carbonitrile	2.62	level2			187.071	276.9	POS	C8H6N6					Organoheterocyclic compounds	有机杂环化合物	Diazines	二氮杂苯	Pyrimidines and pyrimidine derivatives	嘧啶类和嘧啶类衍生物	0.66543	0.547655	0.37004	0.527708	0.636427	0.497312	0.678938	0.604225	0.756624	0.494381	0.962514	1.145	0.195346
712	L-Homoserine lactone	2.62	level2			102.055	250.1	POS	C4H7NO2					Organic acids and derivatives	有机酸及其衍生物	Carboxylic acids and derivatives	羧酸及衍生物	Amino acids, peptides, and analogues	氨基酸、肽和类似物	0.104637	0.149281	0.113393	0.122437	0.0929717	0.0597217	0.156718	0.103137	0.755031	0.573963	0.962912	0.842368	-0.247477
713	Thr-Glu	2.62	level2			247.093	244.4	NEG	C9H16N2O6											0.0622266	0.0677445	0.0523829	0.0607847	0.0655706	0.0748	0.0547474	0.0650393	0.539969	0.592859	0.963407	1.07	0.0976051
714	Apigenin_7-sulfate	2.62	level2			351.019	231.5	POS	C15H10O8S	HMDB0037851		56857-56-8		Phenylpropanoids and polyketides	苯丙素类和聚酮类	Flavonoids	黄酮类	Flavones	黄酮	0.0825453	0.0463038	0.0811132	0.0699874	0.084952	0.0737437	0.0937634	0.084153	1.00598	0.343286	0.962514	1.2024	0.265919
715	Cyclocytidine	2.62	level2			226.084	225.4	POS	C9H11N3O4					Organic oxygen compounds	有机含氧化合物	Organooxygen compounds	有机氧化合物	Ethers	醚	2.38509e-05	0.200764	0.233589	0.144792	0.22951	2.49534e-05	0.228256	0.152597	0.0563604	0.944625	0.999955	1.0539	0.0757428
716	Asticolorin_B	2.62	level2			537.195	225	POS	C33H28O7	HMDB0030134		93376-71-7		Organoheterocyclic compounds	有机杂环化合物	Benzopyrans	苯并吡喃	1-benzopyrans	1-苯并吡喃	2.38509e-05	0.543976	0.574329	0.372776	0.46089	0.521888	0.682899	0.555226	1.08219	0.408924	0.962514	1.48943	0.574764
717	2-Amino-6-(methylsulfanyl)-3,5-pyridinedicarbonitrile	2.62	level2			191.04	202.1	POS	C8H6N4S					Organosulfur compounds	有机硫化合物	Thioethers		Aryl thioethers		2.38509e-05	0.160843	0.186395	0.115754	0.152567	0.175652	0.158562	0.16226	1.06621	0.509544	0.962514	1.40177	0.487249
718	Benzoic acid, 4-[4-[[5-(4,5-dimethyl-2-nitrophenyl)-2-furanyl]methylene]-4,5-dihydro-3-methyl-5-oxo-1H-pyrazol-1-yl]-	2.62	level2			446.135	184.6	POS	C24H19N3O6					Benzenoids	苯环型化合物	Benzene and substituted derivatives	苯和取代衍生物	Benzoic acids and derivatives	苯甲酸及衍生物	0.0796459	0.0780858	0.0648075	0.0741797	0.06598	0.0444496	0.0866676	0.0656991	0.774664	0.551673	0.962514	0.885674	-0.175152
719	Merazolam	2.62	level2			389.036	184.2	POS	C18H14Cl2N4S					Organoheterocyclic compounds	有机杂环化合物	Benzodiazepines		1,4-benzodiazepines		0.102111	0.0965658	0.0825589	0.0937453	0.0762344	0.0428534	0.12675	0.0819459	0.717513	0.662418	0.972304	0.874134	-0.194073
720	5-(Benzylamino)-1,3,4-thiadiazole-2(3H)-thione	2.62	level2			222.015	183.6	NEG	C9H9N3S2					Benzenoids	苯环型化合物	Benzene and substituted derivatives	苯和取代衍生物	Benzylamines		0.0108837	6.18187e-06	0.0123343	0.00774139	0.0115339	0.0133783	0.0114135	0.0121086	0.968555	0.330035	0.962514	1.56413	0.645362
721	3-(1H-Benzimidazol-2-yl)-7-methoxy-2H-chromen-2-one	2.62	level2			293.09	174.1	POS	C17H12N2O3					Phenylpropanoids and polyketides	苯丙素类和聚酮类	Coumarins and derivatives	香豆素类及其衍生物	Coumarins and derivatives	香豆素类及其衍生物	0.0823142	0.0899682	0.0427615	0.0716813	0.0513076	0.304407	0.0583981	0.138038	0.636626	0.476123	0.962514	1.92571	0.945393
722	3,7,8-Trihydroxy-3-methyl-1,4-dihydropyrano[4,3-b]chromen-10-one	2.62	level2			263.058	172.6	NEG	C13H12O6					Organoheterocyclic compounds	有机杂环化合物	Benzopyrans	苯并吡喃	1-benzopyrans	1-苯并吡喃	0.0117726	0.00271364	0.0021497	0.00554532	0.00192827	0.00249353	0.00345932	0.00262704	0.911428	0.448662	0.962514	0.47374	-1.07783
723	1-Formylpyrrolidine-2-carboxylic acid	2.62	level2			142.05	169.3	NEG	C6H9NO3					Organic acids and derivatives	有机酸及其衍生物	Carboxylic acids and derivatives	羧酸及衍生物	Amino acids, peptides, and analogues	氨基酸、肽和类似物	0.0233748	6.18187e-06	0.0190893	0.0141568	0.0202665	6.39171e-06	0.0201486	0.0134738	0.0658464	0.948027	0.999955	0.951758	-0.0713335
724	Thieno[3,2-b][1]benzothiophene-2-carboxylic acid	2.62	level2			232.975	168.6	NEG	C11H6O2S2					Organoheterocyclic compounds	有机杂环化合物	Benzothiophenes		1-benzothiophenes		0.00792389	0.0175123	0.00998505	0.0118071	0.00807827	0.012442	0.00983475	0.0101183	0.354526	0.623268	0.966158	0.856972	-0.222681
725	N-(3-Methoxyphenyl)-2-methyl-3-nitrobenzamide	2.62	level2			287.103	162.8	POS	C15H14N2O4					Benzenoids	苯环型化合物	Benzene and substituted derivatives	苯和取代衍生物	Anilides		0.036101	0.00382853	0.158818	0.0662492	0.185869	0.0655217	0.109846	0.120412	1.12661	0.409505	0.962514	1.81756	0.862005
726	N-Cyclohexylbenzenecarbothioamide	2.62	level2			218.102	162.1	NEG	C13H17NS					Benzenoids	苯环型化合物	Benzene and substituted derivatives	苯和取代衍生物	Benzene and substituted derivatives	苯和取代衍生物	0.0188476	0.00374653	0.027665	0.0167531	0.0150315	0.0236074	0.015411	0.0180166	0.565208	0.874767	0.999955	1.07542	0.104904
727	1-(3,4-Dichlorobenzyl)piperazine	2.62	level2			245.059	155.1	POS	C11H14Cl2N2					Benzenoids	苯环型化合物	Benzene and substituted derivatives	苯和取代衍生物	Halobenzenes		0.288096	0.116787	0.605975	0.336952	0.512809	0.392185	0.623527	0.509507	1.16667	0.336469	0.962514	1.5121	0.596558
728	1-O-Hexadecyl-2-O-(2E-butenoyl)-sn-glyceryl-3-phosphocholine	2.62	level2			550.386	112.4	POS	C28H56NO7P					Lipids and lipid-like molecules	脂质和类脂分子	Glycerophospholipids	甘油磷脂类	Glycerophosphocholines	甘油磷酸胆碱	5.58548	8.60694	8.40391	7.53211	8.13223	3.90997	7.3785	6.47357	0.707126	0.55035	0.962514	0.859463	-0.218492
729	3-Nitrophenylhydrazine	2.62	level2			154.061	67.7	POS	C6H7N3O2	HMDB0245950				Benzenoids	苯环型化合物	Benzene and substituted derivatives	苯和取代衍生物	Nitrobenzenes		0.181864	0.180788	2.35453e-05	0.120892	2.38091e-05	0.201702	0.164485	0.12207	0.071872	0.989789	0.999955	1.00975	0.0139959
730	15S-Hydroperoxy-11Z,13E-eicosadienoic acid	2.62	level2			339.253	49.8	NEG	C20H36O4					Lipids and lipid-like molecules	脂质和类脂分子	Fatty Acyls	脂肪酰类	Eicosanoids	类花生酸	0.0651603	6.18187e-06	0.022901	0.0293558	0.0520291	0.0316942	0.0400101	0.0412444	0.948974	0.583768	0.962912	1.40498	0.490553
731	12,13-Dihydroxy-9Z-octadecenoic acid	2.62	level2			313.237	44.5	NEG	C18H34O4					Lipids and lipid-like molecules	脂质和类脂分子	Fatty Acyls	脂肪酰类	Fatty acids and conjugates	脂肪酸和聚合物	0.0436126	0.0228722	0.0295722	0.032019	0.0258813	6.39171e-06	0.0198342	0.0152407	1.12242	0.166036	0.962514	0.475988	-1.071
732	N-Stearoyltaurine	2.62	level2			390.267	17.7	NEG	C20H41NO4S	HMDB0240595		63155-80-6		Lipids and lipid-like molecules	脂质和类脂分子	Fatty Acyls	脂肪酰类	Fatty amides	脂肪酸酰胺	9.92996	8.72773	24.7665	14.4747	20.9799	6.58684	20.2682	15.945	0.191241	0.843174	0.999262	1.10157	0.139566
733	13-Oxo-8(14)-podocarpen-18-oic acid	2.62	level2			275.167	16.5	NEG	C17H24O3					Benzenoids	苯环型化合物	Phenanthrenes and derivatives		Hydrophenanthrenes		0.547374	0.567987	0.746761	0.620707	0.797446	0.712881	0.495407	0.668578	0.32862	0.685887	0.975912	1.07712	0.107183
734	8-Ethoxy-5-quinolinesulfonic acid	2.62	level2			254.048	15.3	POS	C11H11NO4S					Organoheterocyclic compounds	有机杂环化合物	Quinolines and derivatives	喹啉及衍生物	Quinolines and derivatives		0.142154	0.130706	0.224653	0.165837	0.252823	0.0539651	0.0909943	0.132594	0.956107	0.649829	0.970838	0.799543	-0.322753
735	8-Geranyl-7-hydroxycoumarin	2.62	level2			297.152	15.3	NEG	C19H22O3					Lipids and lipid-like molecules	脂质和类脂分子	Prenol lipids	异戊烯醇脂类	Terpene lactones		1.15782	1.31717	1.20826	1.22775	1.0609	1.15253	1.04987	1.08777	1.69972	0.070592	0.962514	0.885984	-0.174648
736	Benz[a]anthracene-1,7,12(2H)-trione, 3,4-dihydro-8-hydroxy-3-methyl-, (3S)-	2.62	level2			305.084	14.1	NEG	C19H14O4					Phenylpropanoids and polyketides	苯丙素类和聚酮类	Angucyclines		Angucyclines		0.408603	0.447954	0.416292	0.424283	0.41584	0.636274	6.43614e-06	0.350707	1.05335	0.731591	0.983045	0.826587	-0.274762
737	5-(3,4-Dihydroxyphenyl)-6,7-dimethyl-5,6,7,8-tetrahydronaphthalene-2,3-diol	2.62	level2			299.131	12.9	NEG	C18H20O4					Lignans, neolignans and related compounds	木脂素、新木脂素及相关化合物	Aryltetralin lignans		Aryltetralin lignans		3.35629	1.27662	2.42486	2.35259	2.33578	0.174642	0.0740695	0.861498	1.62088	0.192276	0.962514	0.366191	-1.44933
738	Anomalin A	2.62	level2			273.043	12.7	NEG	C14H10O6					Organoheterocyclic compounds	有机杂环化合物	Benzopyrans	苯并吡喃	1-benzopyrans	1-苯并吡喃	0.324935	0.44763	0.107373	0.293313	0.0963804	0.0732288	0.340783	0.170131	0.930553	0.401066	0.962514	0.580032	-0.785796
739	3',4'-Methylenedioxyorobol	2.62	level2			297.043	12.6	NEG	C16H10O6					Phenylpropanoids and polyketides	苯丙素类和聚酮类	Isoflavonoids		Isoflav-2-enes		0.00866576	0.012995	0.0113255	0.0109954	0.012703	0.0123365	0.00439847	0.00981264	0.674749	0.712432	0.981229	0.892429	-0.16419
740	1-(4-Bromo-2-fluorophenyl)cyclopropanecarboxylic acid	2.62	level2			256.96	6.3	NEG	C10H8BrFO2					Benzenoids	苯环型化合物	Benzene and substituted derivatives	苯和取代衍生物	Halobenzenes		0.027821	0.0282254	0.0247801	0.0269422	0.0404739	0.0306521	0.0299431	0.0336897	1.48784	0.13158	0.962514	1.25044	0.32244
741	Cyanidin	2.62	level2			288.058	256.6	POS	C15H11O6	HMDB0002708		13306-05-3	C05905							0.132537	0.184758	0.193818	0.170371	0.127856	0.142527	0.140156	0.136846	1.32566	0.16287	0.962514	0.803227	-0.316121
742	Chloramphenicol	2.62	level2			321.002	228.2	NEG	C11H12Cl2N2O5	HMDB0014589		56-75-7	C00918	Benzenoids	苯环型化合物	Benzene and substituted derivatives	苯和取代衍生物	Nitrobenzenes		0.037346	0.0155316	0.0375719	0.0301498	0.0266515	0.0349309	0.0314943	0.0310256	0.343367	0.914861	0.999955	1.02905	0.0413083
743	PC(38:1)	2.62	level2			816.641	34.1	POS	C46H90NO8P											3.65851	2.46456	4.67595	3.59967	5.35524	2.302	1.64776	3.10167	0.789568	0.722969	0.982218	0.861652	-0.214823
744	Citalopram_aldehyde	2.61	level2			296.106	252.1	POS	C18H14FNO2	HMDB0060462			C16612	Organoheterocyclic compounds	有机杂环化合物	Isocoumarans		Isocoumarans		0.234968	2.21526e-05	0.210753	0.148581	0.217472	0.17063	0.208409	0.198837	0.920345	0.544462	0.962514	1.33824	0.420334
745	2-Bromo-4,6-dichlorophenol	2.61	level2			238.869	242.7	NEG	C6H3BrCl2O					Benzenoids	苯环型化合物	Benzene and substituted derivatives	苯和取代衍生物	Halobenzenes		6.87516e-06	6.18187e-06	0.0222354	0.00741615	0.0182297	0.0198862	0.0191724	0.0190961	1.58832	0.255342	0.962514	2.57493	1.36453
746	2-Amino-3-(1H-pyrazol-1-yl)propanoic acid	2.61	level2			156.077	203.5	POS	C6H9N3O2	HMDB0034267		2734-48-7		Organic acids and derivatives	有机酸及其衍生物	Carboxylic acids and derivatives	羧酸及衍生物	Amino acids, peptides, and analogues	氨基酸、肽和类似物	0.116628	2.21526e-05	2.35453e-05	0.0388911	0.0858229	0.129005	0.101486	0.105438	1.49387	0.178768	0.962514	2.71111	1.43888
747	2-[(1E)-2-(4-Methoxyphenyl)ethenyl]-4(3H)-quinazolinone	2.61	level2			279.11	182.4	POS	C17H14N2O2					Organoheterocyclic compounds	有机杂环化合物	Diazanaphthalenes	二氮杂萘	Benzodiazines	苯并二嗪	0.133944	0.105012	0.208994	0.149317	0.204169	0.246668	0.105126	0.185321	0.581912	0.527826	0.962514	1.24113	0.311652
748	Tropacocaine	2.61	level2			246.15	160.2	POS	C15H19NO2											0.136096	0.207089	0.42262	0.255268	0.377127	0.182227	0.169643	0.242999	0.0519626	0.915979	0.999955	0.951935	-0.0710654
749	1-Octadecyl-2-acetyl-sn-glycero-3-phosphocholine	2.61	level2			552.402	111.6	POS	C28H58NO7P					Lipids and lipid-like molecules	脂质和类脂分子	Glycerophospholipids	甘油磷脂类	Glycerophosphocholines	甘油磷酸胆碱	8.8995	11.868	10.1952	10.3209	11.6953	5.69779	5.54475	7.64595	1.36185	0.290858	0.962514	0.740822	-0.432801
750	Pirimiphos-methyl-N-desethyl	2.61	level2			278.075	47.2	POS	C9H16N3O3PS					Organic acids and derivatives	有机酸及其衍生物	Organic thiophosphoric acids and derivatives		Thiophosphoric acid esters		0.124635	0.0496334	0.246345	0.140205	0.232371	0.204943	0.282987	0.2401	1.36043	0.180785	0.962514	1.7125	0.776105
751	Oclacitinib	2.61	level2			336.147	31.3	NEG	C15H23N5O2S											0.482172	0.209517	0.406434	0.366041	0.384923	0.0721944	0.445896	0.301004	0.712467	0.669499	0.973668	0.822324	-0.282221
752	2-Hexylbutanedioic acid	2.61	level2			201.112	28.8	NEG	C10H18O4					Lipids and lipid-like molecules	脂质和类脂分子	Fatty Acyls	脂肪酰类	Fatty acids and conjugates	脂肪酸和聚合物	0.132379	0.173414	0.185756	0.16385	0.175342	0.0534188	0.108891	0.112551	1.28123	0.256253	0.962514	0.686913	-0.5418
753	7-Amino-4-methylquinolin-2-ol	2.61	level2			175.086	24.7	POS	C10H10N2O					Organoheterocyclic compounds	有机杂环化合物	Quinolines and derivatives	喹啉及衍生物	Aminoquinolines and derivatives		0.796969	2.21526e-05	0.782865	0.526619	0.678754	0.760538	1.17431	0.871201	0.974456	0.321373	0.962514	1.65433	0.726247
754	9Z,11E,13E-Octadecatrienoic acid	2.61	level2			279.232	16.9	POS	C18H30O2					Lipids and lipid-like molecules	脂质和类脂分子	Fatty Acyls	脂肪酰类	Lineolic acids and derivatives	亚油酸及衍生物	0.158535	0.128121	0.114369	0.133675	0.132541	0.163681	0.137263	0.144495	0.710693	0.54202	0.962514	1.08094	0.112288
755	7,4'-Dimethoxy-5-hydroxyisoflavone	2.61	level2			297.079	14.8	NEG	C17H14O5					Phenylpropanoids and polyketides	苯丙素类和聚酮类	Isoflavonoids		O-methylated isoflavonoids		0.574237	0.463336	0.796606	0.611393	0.745163	0.364133	0.451588	0.520295	0.819477	0.579473	0.962912	0.850998	-0.232772
756	(-)-Catechin	2.61	level2			289.074	12.5	NEG	C15H14O6					Phenylpropanoids and polyketides	苯丙素类和聚酮类	Flavonoids	黄酮类	Flavans		6.87516e-06	6.18187e-06	0.509954	0.169989	0.525264	0.322083	0.611299	0.486215	1.60034	0.17205	0.962514	2.86027	1.51615
757	Lorazepam	2.61	level2			319.007	228.2	NEG	C15H10Cl2N2O2	HMDB0014332		846-49-1		Organoheterocyclic compounds	有机杂环化合物	Benzodiazepines		1,4-benzodiazepines		0.0995987	0.0403462	0.100129	0.0800246	0.0698219	0.0901785	0.0806324	0.0802109	0.256507	0.993246	0.999955	1.00233	0.00335564
758	Dexrazoxane	2.61	level2			267.108	59.3	NEG	C11H16N4O4	HMDB0014524		24584-09-6		Organic acids and derivatives	有机酸及其衍生物	Carboxylic acids and derivatives	羧酸及衍生物	Amino acids, peptides, and analogues	氨基酸、肽和类似物	0.0623791	0.047046	0.0311754	0.0468668	6.30815e-06	0.0495114	6.43614e-06	0.0165081	1.54056	0.181656	0.962514	0.352233	-1.5054
759	Emblicanin_A	2.61	level2			783.064	38.3	POS	C34H22O22	HMDB0030437		180465-44-5		Phenylpropanoids and polyketides	苯丙素类和聚酮类	Tannins		Hydrolyzable tannins		0.277538	0.268673	0.227393	0.257868	0.174804	0.140042	0.383341	0.232729	0.601589	0.761993	0.987585	0.902514	-0.147979
760	Lys-Val	2.6	level2			246.181	295.1	POS	C11H23N3O3	HMDB0028964		20556-11-0		Organic acids and derivatives	有机酸及其衍生物	Carboxylic acids and derivatives	羧酸及衍生物	Amino acids, peptides, and analogues	氨基酸、肽和类似物	0.077029	0.0754209	0.0991431	0.0838644	0.106258	0.108172	0.0757439	0.0967248	0.899177	0.378446	0.962514	1.15335	0.205828
761	DL-Isocitric acid lactone	2.6	level2			173.008	269.4	NEG	C6H6O6	HMDB0341313				Organic acids and derivatives	有机酸及其衍生物	Carboxylic acids and derivatives	羧酸及衍生物	Tricarboxylic acids and derivatives		0.0961756	0.0734056	6.34955e-06	0.0565292	6.30815e-06	0.0870639	0.078967	0.0553457	0.0662696	0.977904	0.999955	0.979065	-0.0305235
762	4-Allyl-5-[(2,3-dimethylphenoxy)methyl]-4H-1,2,4-triazole-3-thiol	2.6	level2			274.103	248.7	NEG	C14H17N3OS					Benzenoids	苯环型化合物	Phenol ethers	酚醚类	Phenol ethers		0.0140604	0.00991398	0.0211815	0.015052	0.0226457	0.0297492	0.0195579	0.0239843	1.56591	0.115998	0.962514	1.59343	0.672136
763	2H-1-Benzopyran-2-one, 7-mercapto-4-methyl-	2.6	level2			191.019	245.7	NEG	C10H8O2S					Phenylpropanoids and polyketides	苯丙素类和聚酮类	Coumarins and derivatives	香豆素类及其衍生物	Coumarins and derivatives	香豆素类及其衍生物	0.0254751	0.0144187	0.0153949	0.0184296	6.30815e-06	0.0159637	6.43614e-06	0.00532548	1.57074	0.109445	0.962514	0.288964	-1.79104
764	4-Bromo-N-(6-methyl-2-pyridinyl)benzamide	2.6	level2			291.012	228.3	POS	C13H11BrN2O					Benzenoids	苯环型化合物	Benzene and substituted derivatives	苯和取代衍生物	Benzoic acids and derivatives	苯甲酸及衍生物	0.824923	0.234214	0.556908	0.538682	0.848091	0.437412	1.03883	0.774778	0.891705	0.391999	0.962514	1.43828	0.524349
765	1,6-Anhydro-.beta.-D-glucose	2.6	level2			161.045	219.8	NEG	C6H10O5	HMDB0000640		498-07-7		Organoheterocyclic compounds	有机杂环化合物	Oxepanes		Oxepanes		0.20596	0.183053	0.206833	0.198615	0.198262	6.39171e-06	0.217042	0.138437	1.0178	0.477879	0.962514	0.697009	-0.520751
766	.beta.-Alanylglycine	2.6	level2			145.061	218.3	NEG	C5H10N2O3					Organic acids and derivatives	有机酸及其衍生物	Peptidomimetics	拟肽类	Hybrid peptides	杂合肽	1.26443	1.15566	1.46186	1.29398	1.50432	2.04476	1.55747	1.70218	1.70422	0.103079	0.962514	1.31546	0.395566
767	7-Methoxy-3-(4-methoxyphenyl)-4-phenylcoumarin	2.6	level2			359.125	216.5	POS	C23H18O4					Phenylpropanoids and polyketides	苯丙素类和聚酮类	Neoflavonoids		Neoflavones		0.152547	0.2109	0.18572	0.183056	0.132022	2.49534e-05	0.191108	0.107718	1.05594	0.270427	0.962514	0.588446	-0.765019
768	1,11-Undecanedicarboxylic acid	2.6	level2			243.159	210.6	NEG	C13H24O4	HMDB0002327		505-52-2		Lipids and lipid-like molecules	脂质和类脂分子	Fatty Acyls	脂肪酰类	Fatty acids and conjugates	脂肪酸和聚合物	0.00362726	0.00038494	0.00496111	0.00299111	0.00368375	0.00148177	0.00700574	0.00405708	0.639316	0.638952	0.96952	1.35638	0.439765
769	4-Amino-6-chloropyrimidine-5-carbaldehyde	2.6	level2			158.012	165.5	POS	C5H4ClN3O					Organoheterocyclic compounds	有机杂环化合物	Diazines	二氮杂苯	Pyrimidines and pyrimidine derivatives	嘧啶类和嘧啶类衍生物	1.38785	1.20642	1.12288	1.23905	0.899402	1.19628	0.533567	0.876417	1.47183	0.154681	0.962514	0.707331	-0.499542
770	2,3-Di(2-furyl)quinoxaline	2.6	level2			263.079	156.6	POS	C16H10N2O2					Organoheterocyclic compounds	有机杂环化合物	Diazanaphthalenes	二氮杂萘	Benzodiazines	苯并二嗪	0.053062	2.21526e-05	0.0183417	0.0238086	0.0238315	0.0175279	0.0398934	0.0270842	0.872686	0.855914	0.999442	1.13758	0.185971
771	3-Hydroxyphenylaceitic acid sulfate	2.6	level2			230.996	146.4	NEG	C8H8O6S	HMDB0125163				Organic acids and derivatives	有机酸及其衍生物	Organic sulfuric acids and derivatives	有机硫酸及衍生物	Arylsulfates	芳基硫酸酯	0.125894	0.121658	0.134702	0.127418	0.137432	0.0279577	0.0849635	0.0834512	1.27997	0.29814	0.962514	0.654941	-0.610563
772	Tetradecanedioic acid	2.6	level2			257.175	130.4	NEG	C14H26O4	HMDB0000872		821-38-5		Lipids and lipid-like molecules	脂质和类脂分子	Fatty Acyls	脂肪酰类	Fatty acids and conjugates	脂肪酸和聚合物	0.198179	6.18187e-06	0.0481649	0.0821166	0.0470243	0.193557	0.161807	0.134129	0.986116	0.523234	0.962514	1.6334	0.707877
773	5-Bromotryptamine	2.6	level2			237.001	123.7	NEG	C10H11BrN2					Organoheterocyclic compounds	有机杂环化合物	Indoles and derivatives	吲哚和衍生物	Tryptamines and derivatives	色胺及衍生物	0.0236092	0.0326383	0.0241341	0.0267939	0.0203058	0.0362932	0.0205297	0.0257096	0.288886	0.866415	0.999955	0.959532	-0.0595979
774	Ikarugamycin	2.6	level2			477.28	120.8	NEG	C29H38N2O4											0.138	0.213991	0.0771745	0.143055	0.0752489	0.104549	0.1845	0.121433	0.329234	0.695087	0.977266	0.848852	-0.236416
775	PyroGlu-Val	2.6	level2			227.103	108.3	NEG	C10H16N2O4					Organic acids and derivatives	有机酸及其衍生物	Carboxylic acids and derivatives	羧酸及衍生物	Amino acids, peptides, and analogues	氨基酸、肽和类似物	0.150104	0.190864	0.100419	0.147129	0.10199	0.0505021	0.143291	0.0985943	1.18447	0.264957	0.962514	0.670122	-0.577504
776	Dihydromethysticin	2.6	level2			277.105	27.6	POS	C15H16O5	HMDB0030791		19902-91-1	C09926	Phenylpropanoids and polyketides	苯丙素类和聚酮类	Kavalactones		Kavalactones		4.99799	4.52839	5.33029	4.95222	5.2594	4.90422	5.90171	5.35511	1.09477	0.341148	0.962514	1.08136	0.112841
777	cis-4,10,13,16-Docosatetraenoic acid	2.6	level2			333.279	16.9	POS	C22H36O2					Lipids and lipid-like molecules	脂质和类脂分子	Fatty Acyls	脂肪酰类	Fatty acids and conjugates	脂肪酸和聚合物	0.115522	0.110053	0.137419	0.120998	0.177815	2.49534e-05	0.132632	0.103491	0.963763	0.775276	0.989558	0.855309	-0.225483
778	Gamma-Glutamylglutamine	2.6	level2			276.119	248.9	POS	C10H17N3O6	HMDB0029147		1466-50-8		Organic acids and derivatives	有机酸及其衍生物	Carboxylic acids and derivatives	羧酸及衍生物	Amino acids, peptides, and analogues	氨基酸、肽和类似物	0.286236	0.32507	0.377039	0.329448	0.477585	0.628467	0.364365	0.490139	1.63029	0.11793	0.962514	1.48776	0.573138
779	3-Hydroxyglutaric acid	2.6	level2			147.029	231.5	NEG	C5H8O5	HMDB0000428		638-18-6		Organic acids and derivatives	有机酸及其衍生物	Hydroxy acids and derivatives	羟基酸及衍生物	Beta hydroxy acids and derivatives	Beta-羟基酸及衍生物	0.0278472	0.00885079	0.0180024	0.0182335	0.0192309	0.0216151	0.0208185	0.0205548	0.64225	0.714281	0.981285	1.12731	0.172889
780	2-Fluoro-4-biphenylylboronic acid	2.59	level2			215.067	235.8	NEG	C12H10BFO2					Benzenoids	苯环型化合物	Benzene and substituted derivatives	苯和取代衍生物	Biphenyls and derivatives		0.0840616	0.045511	0.0830572	0.0708766	0.104823	0.0706804	6.43614e-06	0.0585034	1.04368	0.729596	0.982843	0.825426	-0.27679
781	Isogentisin	2.59	level2			257.044	235	NEG	C14H10O5	HMDB0030871		491-64-5	C10070	Organoheterocyclic compounds	有机杂环化合物	Benzopyrans	苯并吡喃	1-benzopyrans	1-苯并吡喃	0.0526353	0.0391626	0.052949	0.048249	0.0605538	0.0457157	6.43614e-06	0.0354253	1.076	0.532169	0.962514	0.734219	-0.445718
782	Ile-Asp	2.59	level2			245.113	223	NEG	C10H18N2O5					Organic acids and derivatives	有机酸及其衍生物	Carboxylic acids and derivatives	羧酸及衍生物	Amino acids, peptides, and analogues	氨基酸、肽和类似物	0.00648994	0.00564181	0.00768855	0.00660677	0.00745273	0.00483278	0.00726058	0.00651537	0.197984	0.933632	0.999955	0.986166	-0.020098
783	(3xi,6xi)-Cyclo(alanylvalyl)	2.59	level2			171.113	221	POS	C8H14N2O2	HMDB0033926				Organic acids and derivatives	有机酸及其衍生物	Carboxylic acids and derivatives	羧酸及衍生物	Amino acids, peptides, and analogues	氨基酸、肽和类似物	0.0814428	2.21526e-05	0.0837185	0.0550612	0.0725703	0.0415633	0.0656404	0.0599246	0.843098	0.875321	0.999955	1.08833	0.122114
784	2-Amino-1,3-benzothiazole-6-carbonitrile	2.59	level2			176.029	202.6	POS	C8H5N3S					Organoheterocyclic compounds	有机杂环化合物	Benzothiazoles		Benzothiazoles		0.495887	0.426822	0.5928	0.505169	0.665004	2.49534e-05	0.650858	0.438629	0.963306	0.781739	0.990715	0.868281	-0.203765
785	3-Nitropyridine-2-thiol	2.59	level2			154.993	182.4	NEG	C5H4N2O2S					Organic 1,3-dipolar compounds	有机1,3-偶极化合物	Allyl-type 1,3-dipolar organic compounds		Organic nitro compounds		0.00068877	0.000575821	6.34955e-06	0.000423647	0.000898181	0.000680556	0.000649718	0.000742819	1.01972	0.229351	0.962514	1.75339	0.810148
786	6,7-Dimethoxy-2-phenylquinoxaline	2.59	level2			267.11	181.1	POS	C16H14N2O2	HMDB0259359				Organoheterocyclic compounds	有机杂环化合物	Diazanaphthalenes	二氮杂萘	Benzodiazines	苯并二嗪	0.654484	0.605661	1.70596	0.988702	1.74244	2.60632	0.570392	1.63972	0.785026	0.399192	0.962514	1.65846	0.729841
787	3-(Aminocarbonyl)benzoic acid	2.59	level2			166.051	165.8	POS	C8H7NO3					Benzenoids	苯环型化合物	Benzene and substituted derivatives	苯和取代衍生物	Benzoic acids and derivatives	苯甲酸及衍生物	1.1016	0.770213	0.502268	0.79136	0.934145	0.228727	0.441374	0.534749	1.17849	0.398037	0.962514	0.675734	-0.565474
788	4-(1H-Benzimidazol-2-yl)-1,2,5-oxadiazol-3-ylamine	2.59	level2			202.074	160.7	POS	C9H7N5O					Organoheterocyclic compounds	有机杂环化合物	Benzimidazoles		Benzimidazoles		0.144802	0.112029	0.172721	0.143184	0.16753	0.142954	0.146597	0.15236	0.539764	0.656635	0.972016	1.06409	0.0896149
789	N2-Oxalylarginine	2.59	level2			247.105	156.4	POS	C8H14N4O5	HMDB0032763		90250-86-5		Organic acids and derivatives	有机酸及其衍生物	Carboxylic acids and derivatives	羧酸及衍生物	Amino acids, peptides, and analogues	氨基酸、肽和类似物	0.109473	2.21526e-05	0.038359	0.0492846	0.050154	0.0365298	0.0815803	0.056088	0.881049	0.854236	0.999442	1.13804	0.186555
790	Asn-Asp	2.59	level2			246.074	154.7	NEG	C8H13N3O6											0.021121	0.0165207	0.0205945	0.0194121	0.02138	0.0216507	0.0183772	0.0204693	0.537438	0.587048	0.962912	1.05446	0.0765065
791	Clausenin	2.59	level2			261.073	147.6	POS	C14H12O5					Phenylpropanoids and polyketides	苯丙素类和聚酮类	Coumarins and derivatives	香豆素类及其衍生物	Pyranocoumarins		0.0768569	0.0636077	0.0888841	0.0764496	0.0980519	0.0742614	0.0891723	0.0871619	0.989281	0.347495	0.962514	1.14012	0.189189
792	1H-Indazole-3-carboxamide, 1-(5-fluoropentyl)-N-8-quinolinyl-	2.59	level2			377.178	145.5	POS	C22H21FN4O					Organoheterocyclic compounds	有机杂环化合物	Benzopyrazoles		Indazoles		0.072519	0.0564291	0.0818922	0.0702801	0.0825652	0.0827337	0.103533	0.0896107	1.55958	0.130563	0.962514	1.27505	0.350554
793	[4-Amino-2-(ethylamino)-1,3-thiazol-5-yl](4-chlorophenyl)methanone	2.59	level2			282.049	135.2	POS	C12H12ClN3OS					Organic oxygen compounds	有机含氧化合物	Organooxygen compounds	有机氧化合物	Carbonyl compounds	羰基化合物	0.144627	0.134709	0.0728827	0.117406	0.0815977	0.149636	0.137722	0.122985	0.267374	0.864731	0.999955	1.04752	0.0669757
794	2-(4-Fluorophenyl)-2,3-dihydro-1H-perimidine	2.59	level2			265.116	132.1	POS	C17H13FN2					Benzenoids	苯环型化合物	Naphthalenes	萘类	Naphthalenes	萘类	0.0917863	0.075335	0.0750503	0.0807239	0.077252	0.0254356	0.0301344	0.044274	1.70704	0.1049	0.962514	0.548462	-0.866535
795	4,9-Dihydro-1-(2-methoxyethyl)-2-methyl-4,9-dioxo-3-(2-pyrazinylmethyl)-1H-naphth[2,3-d]imidazolium cation	2.59	level2			363.142	130.2	POS	C20H19N4O3					Benzenoids	苯环型化合物	Naphthalenes	萘类	Naphthalenes	萘类	0.0886351	0.0862254	0.0907534	0.088538	0.0950076	0.100781	0.120256	0.105348	1.77901	0.0958844	0.962514	1.18987	0.250798
796	6-Hydroxy-6-(3-hydroxy-2,3-dimethylcyclopentyl)-2-methylheptanoic acid	2.59	level2			271.19	111	NEG	C15H28O4					Lipids and lipid-like molecules	脂质和类脂分子	Prenol lipids	异戊烯醇脂类	Sesquiterpenoids		0.0538945	0.0860598	0.0189564	0.0529702	0.0152789	0.0482862	0.058646	0.040737	0.333934	0.628398	0.967431	0.769055	-0.378841
797	1-Palmitoyl-2-thiopalmitoyl phosphatidylcholine	2.59	level2			750.539	34.5	POS	C40H80NO7PS					Organic nitrogen compounds	有机含氮化合物	Organonitrogen compounds	有机氮化合物	Quaternary ammonium salts	季铵盐	2.38509e-05	0.65482	0.594958	0.4166	0.616694	0.307871	0.351609	0.425391	0.970486	0.971368	0.999955	1.0211	0.0301262
798	6,7-Dihydro-5H-cyclopenta[d]pyrimidine-2,4-diamine	2.59	level2			151.096	27.6	POS	C7H10N4					Organoheterocyclic compounds	有机杂环化合物	Diazines	二氮杂苯	Pyrimidines and pyrimidine derivatives	嘧啶类和嘧啶类衍生物	9.46226	8.61482	9.68689	9.25466	9.19172	9.84028	2.34116e-05	6.34401	1.09257	0.456654	0.962514	0.685494	-0.544785
799	Nodakenitin	2.59	level2			247.092	254.7	POS	C14H14O4	HMDB0302268			C09278	Phenylpropanoids and polyketides	苯丙素类和聚酮类	Coumarins and derivatives	香豆素类及其衍生物	Furanocoumarins		2.61686	2.81331	0.627492	2.01922	0.686948	1.4228	2.96089	1.69021	0.203018	0.750941	0.98528	0.837063	-0.256592
800	Glutamylalanine	2.59	level2			219.097	237.5	POS	C8H14N2O5	HMDB0003764		21064-18-6		Organic acids and derivatives	有机酸及其衍生物	Carboxylic acids and derivatives	羧酸及衍生物	Amino acids, peptides, and analogues	氨基酸、肽和类似物	0.0673562	0.0741717	0.192397	0.111308	0.225147	0.164068	0.0946547	0.16129	0.979019	0.417935	0.962514	1.44904	0.535095
801	Anagrelide	2.59	level2			253.987	222.9	NEG	C10H7Cl2N3O	HMDB0014406		68475-42-3		Organoheterocyclic compounds	有机杂环化合物	Diazanaphthalenes	二氮杂萘	Benzodiazines	苯并二嗪	0.0107882	0.0105746	0.0116734	0.011012	0.0147347	0.014871	0.0218143	0.01714	1.95514	0.117061	0.962514	1.55648	0.638284
802	Methanedisulfonic acid	2.58	level2			174.937	249.2	NEG	CH4O6S2					Organic acids and derivatives	有机酸及其衍生物	Organic sulfonic acids and derivatives	有机磺酸及衍生物	Organosulfonic acids and derivatives	有机磺酸及衍生物	0.127686	0.112468	0.12077	0.120308	0.116999	0.0924081	0.110977	0.106795	1.4297	0.191591	0.962514	0.88768	-0.171889
803	3-Aminopropyl(2-phenylethyl)phosphinic acid	2.58	level2			228.117	242.6	POS	C11H18NO2P					Benzenoids	苯环型化合物	Benzene and substituted derivatives	苯和取代衍生物	Benzene and substituted derivatives	苯和取代衍生物	0.441952	0.759736	0.582532	0.59474	0.5345	0.734739	0.580558	0.616599	0.416019	0.85229	0.999442	1.03675	0.0520729
804	Lotaustralin	2.58	level2			262.128	234.3	POS	C11H19NO6					Organic oxygen compounds	有机含氧化合物	Organooxygen compounds	有机氧化合物	Carbohydrates and carbohydrate conjugates	碳水化合物和碳水化合物结合物	0.285985	0.257545	0.21663	0.253387	0.219294	0.176578	0.150833	0.182235	1.83969	0.0660757	0.962514	0.719196	-0.475542
805	7-Hydroxycoumarin-4-acetic acid	2.58	level2			221.042	170	POS	C11H8O5					Phenylpropanoids and polyketides	苯丙素类和聚酮类	Coumarins and derivatives	香豆素类及其衍生物	Hydroxycoumarins		0.0635348	0.00961337	0.00861018	0.0272528	0.0082493	0.223242	0.0995278	0.11034	1.04876	0.269579	0.962514	4.04875	2.01748
806	4-(9H-Fluoren-2-yl)-1,3-thiazol-2-amine	2.58	level2			265.077	169.6	POS	C16H12N2S					Benzenoids	苯环型化合物	Fluorenes		Fluorenes		0.525337	0.0241777	0.130851	0.226789	0.127414	1.11052	0.78246	0.673464	1.20228	0.243363	0.962514	2.96956	1.57025
807	L-Arginine ethyl ester	2.58	level2			203.15	162.9	POS	C8H18N4O2					Organic acids and derivatives	有机酸及其衍生物	Carboxylic acids and derivatives	羧酸及衍生物	Amino acids, peptides, and analogues	氨基酸、肽和类似物	0.426267	0.395455	0.349134	0.390285	0.342754	0.414637	0.357928	0.371773	0.640372	0.586266	0.962912	0.952567	-0.0701072
808	3-Amino-1-cyclohexylurea	2.58	level2			158.129	128	POS	C7H15N3O					Organic nitrogen compounds	有机含氮化合物	Organonitrogen compounds	有机氮化合物	Hydrazines and derivatives		0.136462	0.204614	0.492928	0.278001	0.531039	0.555212	0.334698	0.473649	1.40858	0.205809	0.962514	1.70377	0.768728
809	Homoarecoline	2.58	level2			170.117	122.8	POS	C9H15NO2	HMDB0038321		28125-84-0		Alkaloids and derivatives	生物碱和衍生物	Alkaloids and derivatives	生物碱和衍生物	Alkaloids and derivatives	生物碱和衍生物	2.38509e-05	0.0622028	0.0975431	0.0532566	0.197043	0.209499	2.34116e-05	0.135522	0.153984	0.326217	0.962514	2.5447	1.34749
810	2-Arachidonoyl-1-stearoyl-sn-glycero-3-phosphoethanolamine	2.58	level2			766.536	37	NEG	C43H78NO8P	HMDB0009003		61216-62-4		Lipids and lipid-like molecules	脂质和类脂分子	Glycerophospholipids	甘油磷脂类	Glycerophosphoethanolamines	磷脂酰乙醇胺	0.453145	0.674748	0.285198	0.47103	0.278236	0.330392	0.180469	0.263032	1.52912	0.160911	0.962514	0.558418	-0.840582
811	PC(18:1(9Z)/P-18:0)	2.58	level2			772.62	34.6	POS	C44H86NO7P	HMDB0008127				Lipids and lipid-like molecules	脂质和类脂分子	Glycerophospholipids	甘油磷脂类	Glycerophosphocholines	甘油磷酸胆碱	1.35116	0.860624	1.16535	1.12571	1.35765	0.708181	0.446353	0.837395	1.22182	0.399863	0.962514	0.743881	-0.426857
812	PC(18:1(9Z)/P-16:0)	2.58	level2			744.591	19.2	POS	C42H82NO7P	HMDB0008126			C00157	Lipids and lipid-like molecules	脂质和类脂分子	Glycerophospholipids	甘油磷脂类	Glycerophosphocholines	甘油磷酸胆碱	2.15555	1.43288	1.89043	1.82629	2.18275	1.47202	0.829097	1.49462	1.02634	0.496832	0.962514	0.818395	-0.289131
813	5-Bromo-4-fluoro-2-hydroxybenzoic acid	2.58	level2			232.924	8.7	NEG	C7H4BrFO3					Benzenoids	苯环型化合物	Benzene and substituted derivatives	苯和取代衍生物	Benzoic acids and derivatives	苯甲酸及衍生物	0.0731963	0.0797167	0.070344	0.074419	0.070616	0.0773581	0.0742921	0.0740887	0.0107359	0.927074	0.999955	0.995562	-0.00641724
814	Flunixin	2.58	level2			295.069	4.7	NEG	C14H11F3N2O2	HMDB0252340				Benzenoids	苯环型化合物	Benzene and substituted derivatives	苯和取代衍生物	Trifluoromethylbenzenes		0.0013125	6.18187e-06	6.34955e-06	0.000441678	0.0011687	0.0011768	0.00131424	0.00121991	1.49274	0.214661	0.962514	2.762	1.46571
815	EUGENYL_BENZOATE	2.58	level2			269.115	193.8	POS	C17H16O3	HMDB0032056		531-26-0		Phenylpropanoids and polyketides	苯丙素类和聚酮类	Depsides and depsidones		Depsides and depsidones		0.150844	0.13442	0.11211	0.132458	0.128313	0.127581	0.127879	0.127924	0.427655	0.725378	0.982317	0.96577	-0.0502481
816	Adapalene	2.58	level2			411.201	39.9	NEG	C28H28O3	HMDB0014355		106685-40-9		Lipids and lipid-like molecules	脂质和类脂分子	Prenol lipids	异戊烯醇脂类	Retinoids		0.0112091	0.0441744	0.0080728	0.0211521	0.00885773	0.124768	0.0846121	0.0727461	1.17742	0.223939	0.962514	3.43919	1.78207
817	Glycyl-Gamma-glutamate	2.57	level2			204.098	284.1	POS	C7H13N3O4	HMDB0028855				Organic acids and derivatives	有机酸及其衍生物	Carboxylic acids and derivatives	羧酸及衍生物	Amino acids, peptides, and analogues	氨基酸、肽和类似物	4.42027	3.61914	3.66793	3.90245	2.38091e-05	2.49534e-05	4.00515	1.33507	1.49449	0.132087	0.962514	0.34211	-1.54747
818	3'-Azido-3'-deoxythymidine 5'-monophosphate	2.57	level2			346.054	248.3	NEG	C10H14N5O7P					Organoheterocyclic compounds	有机杂环化合物	Diazines	二氮杂苯	Pyrimidines and pyrimidine derivatives	嘧啶类和嘧啶类衍生物	0.0527953	0.0772065	0.00447025	0.044824	0.00924872	0.0342209	0.107837	0.0504354	0.268527	0.885271	0.999955	1.12519	0.170164
819	2-[5-(2-Hydroxypropyl)oxolan-2-yl]propanoic acid	2.57	level2			201.113	238.2	NEG	C10H18O4					Organoheterocyclic compounds	有机杂环化合物	Oxolanes		Oxolanes		0.0055735	0.00440539	0.0190377	0.00967218	6.30815e-06	0.00100956	0.00798176	0.00299921	1.14992	0.278238	0.962514	0.310086	-1.68926
820	4-Allyl-5-(2-methylphenyl)-4H-1,2,4-triazol-3-yl hydrosulfide	2.57	level2			232.093	232.5	POS	C12H13N3S					Organoheterocyclic compounds	有机杂环化合物	Azoles	吡咯类	Triazoles		0.782374	0.618274	0.823534	0.741394	0.7152	0.793141	0.749577	0.752639	0.25848	0.874162	0.999955	1.01517	0.0217186
821	N-Benzylthieno[2,3-d]pyrimidin-4-amine	2.57	level2			242.077	230.4	POS	C13H11N3S					Organoheterocyclic compounds	有机杂环化合物	Thienopyrimidines		Thienopyrimidines		0.0342533	0.0308219	0.0258983	0.0303245	0.0290637	0.0387577	0.0379247	0.0352487	1.20164	0.279201	0.962514	1.16238	0.217086
822	2-Amino-4,5-dihydronaphtho[1,2-b]thiophene-3-carbonitrile	2.57	level2			227.064	226.9	POS	C13H10N2S					Benzenoids	苯环型化合物	Naphthalenes	萘类	Naphthothiophenes		0.276661	0.26372	0.287791	0.276057	2.38091e-05	0.300804	0.259098	0.186642	0.862036	0.442341	0.962514	0.676098	-0.564695
823	5-Butyl-1H-pyrazole-3-carboxylic acid	2.57	level2			169.097	216.5	POS	C8H12N2O2					Organoheterocyclic compounds	有机杂环化合物	Azoles	吡咯类	Pyrazoles	吡唑	0.0418816	0.025905	0.0247806	0.0308558	0.0239753	0.0301446	0.0492019	0.0344406	0.42807	0.722001	0.982069	1.11618	0.158571
824	(2R)-2-(2,5-Difluorophenyl)pyrrolidine	2.57	level2			184.094	207.5	POS	C10H11F2N					Organoheterocyclic compounds	有机杂环化合物	Pyrrolidines	吡咯烷	Phenylpyrrolidines		0.241202	0.318424	0.321104	0.293577	0.346038	0.616985	0.245291	0.402771	0.907825	0.392515	0.962514	1.37195	0.456223
825	5-(3-Phenylpropyl)-1H-1,2,3,4-tetrazole	2.57	level2			187.097	205.9	NEG	C10H12N4					Benzenoids	苯环型化合物	Benzene and substituted derivatives	苯和取代衍生物	Benzene and substituted derivatives	苯和取代衍生物	0.0190565	6.18187e-06	0.0173712	0.0121447	0.0174472	6.39171e-06	0.0168156	0.0114231	0.0688319	0.935272	0.999955	0.940584	-0.0883718
826	4-Amino-2-oxo-1,2-dihydropyrimidine-5-carboxylic acid	2.57	level2			156.042	176.2	POS	C5H5N3O3	HMDB0246202				Organoheterocyclic compounds	有机杂环化合物	Diazines	二氮杂苯	Pyrimidines and pyrimidine derivatives	嘧啶类和嘧啶类衍生物	1.7424	1.24593	1.67055	1.55296	1.61937	1.30337	1.09817	1.34031	1.10709	0.382067	0.962514	0.863065	-0.212459
827	6-(Chloromethyl)-1,3,5-triazine-2,4-diamine	2.57	level2			160.037	169.2	POS	C4H6ClN5					Organoheterocyclic compounds	有机杂环化合物	Triazines		Aminotriazines		4.02502	2.21526e-05	4.10039	2.70848	4.26277	2.49534e-05	3.94935	2.73738	0.0505556	0.988755	0.999955	1.01067	0.0153141
828	Sambutoxin	2.57	level2			452.276	121.6	NEG	C28H39NO4	HMDB0041085		160047-56-3		Lipids and lipid-like molecules	脂质和类脂分子	Prenol lipids	异戊烯醇脂类	Terpene glycosides		0.259309	0.246593	0.176273	0.227392	0.165265	0.183491	0.131672	0.160142	1.71802	0.0881045	0.962514	0.704258	-0.505824
829	1-[4-(Acetylamino)phenyl]-5-oxo-3-pyrrolidinecarboxylic acid	2.57	level2			261.087	104.1	NEG	C13H14N2O4					Organoheterocyclic compounds	有机杂环化合物	Pyrrolidines	吡咯烷	Phenylpyrrolidines		0.0541707	0.0764127	0.0353863	0.0553233	0.0311013	0.0130485	0.0563587	0.0335028	1.18996	0.275105	0.962514	0.605583	-0.723603
830	Fenaminosulf	2.57	level2			228.042	102	NEG	C8H11N3O3S											0.0159867	0.0135783	0.0558036	0.0284562	0.0587176	0.051988	0.0421698	0.0509585	1.46192	0.195885	0.962514	1.79077	0.840578
831	Phenol, 3-fluoro-4-(trifluoromethoxy)-	2.57	level2			195.01	88.7	NEG	C7H4F4O2					Benzenoids	苯环型化合物	Phenols	酚类	4-alkoxyphenols		0.135094	0.136943	0.112361	0.128132	0.108208	0.0911711	0.106842	0.102074	1.82511	0.0534412	0.962514	0.796626	-0.328025
832	5-Carbethoxycytosine	2.57	level2			184.073	35.6	POS	C7H9N3O3					Organoheterocyclic compounds	有机杂环化合物	Diazines	二氮杂苯	Pyrimidines and pyrimidine derivatives	嘧啶类和嘧啶类衍生物	1.95501	4.01	3.2639	3.0763	1.87535	1.89986	2.877	2.2174	1.02112	0.278303	0.962514	0.720801	-0.472327
833	1-(1Z-Octadecenyl)-2-(4Z,7Z,10Z,13Z,16Z,19Z-docosahexaenoyl)-sn-glycero-3-phosphoethanolamine	2.57	level2			774.541	34.7	NEG	C45H78NO7P											0.852814	0.812849	0.379407	0.68169	0.403553	0.224873	0.226489	0.284972	1.84767	0.0714104	0.962514	0.418037	-1.2583
834	Ubiquinol_8	2.57	level2			731.604	29.8	POS	C49H78O4	HMDB0001304		56275-39-9	C00390	Lipids and lipid-like molecules	脂质和类脂分子	Prenol lipids	异戊烯醇脂类	Quinone and hydroquinone lipids		1.36967	1.29924	0.933029	1.20064	0.813577	0.663218	0.640552	0.705782	2.02321	0.0274418	0.962514	0.587836	-0.766515
835	Arg-Ser-Arg	2.57	level2			418.248	17.2	POS	C15H31N9O5					Organic acids and derivatives	有机酸及其衍生物	Carboxylic acids and derivatives	羧酸及衍生物	Amino acids, peptides, and analogues	氨基酸、肽和类似物	0.122538	2.21526e-05	0.106353	0.0763044	0.0848429	0.065726	0.146435	0.0990012	0.898133	0.644027	0.970352	1.29745	0.37568
836	2-(1,3-Thiazol-4-yl)-1H-benzimidazol-5-amine	2.57	level2			215.037	13.4	NEG	C10H8N4S					Organoheterocyclic compounds	有机杂环化合物	Benzimidazoles		Benzimidazoles		0.52522	0.522606	0.657679	0.568502	0.620402	1.07461	6.43614e-06	0.565006	1.01722	0.992109	0.999955	0.993851	-0.00889821
837	Methyl 4-formyl-3-hydroxy-2-naphthoate	2.57	level2			229.053	13.3	NEG	C13H10O4					Benzenoids	苯环型化合物	Naphthalenes	萘类	Naphthalenecarboxylic acids and derivatives		5.71883	1.67241	4.82868	4.07331	4.66547	9.03726	8.66416	7.45563	1.39015	0.143368	0.962514	1.83036	0.872129
838	Piceatannol	2.57	level2			243.069	13.2	NEG	C14H12O4	HMDB0004215		10083-24-6	C05901	Phenylpropanoids and polyketides	苯丙素类和聚酮类	Stilbenes		Stilbenes		6.87516e-06	6.18187e-06	0.422901	0.140971	0.378747	6.39171e-06	0.40072	0.259824	0.742598	0.569029	0.962514	1.8431	0.882136
839	4,4,4-Trifluorobutyric acid	2.57	level2			141.017	10.3	NEG	C4H5F3O2					Lipids and lipid-like molecules	脂质和类脂分子	Fatty Acyls	脂肪酰类	Fatty acids and conjugates	脂肪酸和聚合物	0.321996	0.30309	0.288264	0.30445	0.310024	0.322913	0.302041	0.311659	0.599428	0.564734	0.962514	1.02368	0.033765
840	1h-indole-3-butanoic acid	2.57	level2			204.098	303.6	POS	C12H13NO2	HMDB0002096		133-32-4	C11284	Organoheterocyclic compounds	有机杂环化合物	Indoles and derivatives	吲哚和衍生物	Indoles	吲哚	3.42481	2.12732	3.06459	2.87224	4.0366	3.12223	3.94937	3.70273	1.33735	0.161437	0.962514	1.28914	0.366414
841	N-ALPHA-ACETYL-ASPARAGINE	2.57	level2			175.071	233.8	POS	C6H10N2O4	HMDB0006028		4033-40-3		Organic acids and derivatives	有机酸及其衍生物	Carboxylic acids and derivatives	羧酸及衍生物	Amino acids, peptides, and analogues	氨基酸、肽和类似物	0.0531987	0.0656186	0.0690038	0.062607	0.064669	2.49534e-05	0.061183	0.041959	1.0233	0.391929	0.962514	0.670196	-0.577345
842	Tolmetin	2.57	level2			258.11	225.1	POS	C15H15NO3	HMDB0014643		26171-23-3	C07149	Organic oxygen compounds	有机含氧化合物	Organooxygen compounds	有机氧化合物	Carbonyl compounds	羰基化合物	15.2398	10.2355	13.2752	12.9169	13.9659	9.28876	14.4269	12.5605	0.270081	0.878849	0.999955	0.972414	-0.0403572
843	Diethylthiophosphate	2.57	level2			169.011	52.3	NEG	C4H11O3PS	HMDB0001460		5871-17-0	C06607	Organic acids and derivatives	有机酸及其衍生物	Organic thiophosphoric acids and derivatives		Thiophosphoric acid esters		0.060448	0.0849424	0.12112	0.0888368	0.0939969	0.144439	0.0761469	0.104861	0.703557	0.584716	0.962912	1.18038	0.239247
844	4,4'-Thiodianiline	2.56	level2			217.082	279.8	POS	C12H12N2S					Organosulfur compounds	有机硫化合物	Thioethers		Aryl thioethers		0.956462	0.179742	0.660327	0.598844	0.916239	0.27891	0.977901	0.72435	0.374976	0.713246	0.981285	1.20958	0.274507
845	5,6,7,8-Tetrahydrothieno[2,3-b]quinolin-4-amine	2.56	level2			205.082	227.4	POS	C11H12N2S					Organoheterocyclic compounds	有机杂环化合物	Quinolines and derivatives	喹啉及衍生物	Aminoquinolines and derivatives		2.76646	2.04385	2.96231	2.59088	2.5956	2.35429	2.18007	2.37665	0.74042	0.520093	0.962514	0.917316	-0.124509
846	2-(Hydroxymethyl)-5-methyl-4H,7H-[1,2,4]triazolo[1,5-a]pyrimidin-7-one	2.56	level2			179.055	224.8	NEG	C7H8N4O2					Organoheterocyclic compounds	有机杂环化合物	Triazolopyrimidines		Triazolopyrimidines		6.87516e-06	0.0597649	0.0648088	0.0415268	0.0571393	0.0679903	0.0549668	0.0600321	1.07267	0.431936	0.962514	1.44562	0.53169
847	2',3'-Isopropylideneguanosine	2.56	level2			322.112	221.4	NEG	C13H17N5O5					Nucleosides, nucleotides, and analogues	核苷、核苷酸和类似物	Purine nucleosides	嘌呤核苷类	Purine nucleosides	嘌呤核苷类	0.0106758	0.0144184	0.0113274	0.0121405	0.0137112	0.0182979	0.0155763	0.0158618	1.71464	0.10232	0.962514	1.30652	0.385726
848	3,4-Thiophenedicarbonitrile	2.56	level2			135.003	193	POS	C6H2N2S					Organoheterocyclic compounds	有机杂环化合物	Heteroaromatic compounds		Heteroaromatic compounds		0.0864428	0.0887876	0.0505219	0.0752507	0.0978672	0.0629578	0.066038	0.075621	0.044337	0.983343	0.999955	1.00492	0.00708096
849	N-Allyl-N-(2-bromo-2-propenyl)amine	2.56	level2			176.008	184.1	POS	C6H10BrN					Organohalogen compounds	有机卤素化合物	Vinyl halides		Vinyl bromides		0.318825	0.299369	0.284212	0.300802	0.307245	2.49534e-05	2.34116e-05	0.102431	1.67948	0.191287	0.962514	0.340526	-1.55416
850	2,3-Dichlorobenzohydrazide	2.56	level2			204.995	173.6	POS	C7H6Cl2N2O					Benzenoids	苯环型化合物	Benzene and substituted derivatives	苯和取代衍生物	Benzoic acids and derivatives	苯甲酸及衍生物	0.102505	0.100097	0.0957716	0.0994577	0.0825278	0.0810899	0.0513458	0.0716545	1.74506	0.0548975	0.962514	0.720452	-0.473025
851	(2E)-4-Hydroxybut-2-enoic acid	2.56	level2			101.024	169.9	NEG	C4H6O3	HMDB0003381		24587-49-3		Lipids and lipid-like molecules	脂质和类脂分子	Fatty Acyls	脂肪酰类	Fatty acids and conjugates	脂肪酸和聚合物	0.248374	0.278263	0.240165	0.255601	0.235713	0.243123	6.43614e-06	0.159614	1.11133	0.351973	0.962514	0.624466	-0.679305
852	Ethyl 2-amino-4-phenylthiophene-3-carboxylate	2.56	level2			248.077	155	POS	C13H13NO2S					Organoheterocyclic compounds	有机杂环化合物	Thiophenes		Thiophene carboxylic acids and derivatives		0.261668	0.193279	0.276146	0.243697	0.253842	0.246236	0.229304	0.243128	0.0125484	0.983912	0.999955	0.997662	-0.00337737
853	4-(Hydroxymethyl)benzenesulfonic acid	2.56	level2			187.009	135.6	NEG	C7H8O4S					Benzenoids	苯环型化合物	Benzene and substituted derivatives	苯和取代衍生物	Benzenesulfonic acids and derivatives		0.0187673	0.0212211	0.018377	0.0194551	0.020319	0.0148802	6.43614e-06	0.0117352	1.13211	0.330842	0.962514	0.603194	-0.729306
854	2-Hydroxy-N-(4-methylphenyl)-5-nitrobenzamide	2.56	level2			273.085	135.2	POS	C14H12N2O4					Benzenoids	苯环型化合物	Benzene and substituted derivatives	苯和取代衍生物	Anilides		0.0026237	0.00296545	0.00321552	0.00293489	0.00520527	2.49534e-05	0.00430991	0.00318004	0.793337	0.892521	0.999955	1.08353	0.11574
855	3-Fluoro-5-hydroxypyridine	2.56	level2			114.034	73.5	POS	C5H4FNO					Organoheterocyclic compounds	有机杂环化合物	Pyridines and derivatives	吡啶及衍生物	Hydroxypyridines		0.173594	0.0569122	0.212564	0.14769	0.284556	0.296834	0.305021	0.295471	1.57135	0.0849405	0.962514	2.00061	1.00044
856	2-Arachidonoyl-1-palmitoyl-sn-glycero-3-phosphoethanolamine	2.56	level2			738.505	37.9	NEG	C41H74NO8P	HMDB0008937		70812-59-8		Lipids and lipid-like molecules	脂质和类脂分子	Glycerophospholipids	甘油磷脂类	Glycerophosphoethanolamines	磷脂酰乙醇胺	0.294323	6.18187e-06	0.200709	0.165013	0.155881	0.15386	0.144652	0.151464	0.837973	0.890362	0.999955	0.917895	-0.1236
857	2-Docosahexaenoyl-1-stearoyl-sn-glycero-3-phosphoethanolamine	2.56	level2			790.534	35.1	NEG	C45H78NO8P	HMDB0009012				Lipids and lipid-like molecules	脂质和类脂分子	Glycerophospholipids	甘油磷脂类	Glycerophosphoethanolamines	磷脂酰乙醇胺	0.0441234	0.071708	0.01534	0.0437238	0.0154	0.0413593	0.00938936	0.0220496	1.10233	0.317663	0.962514	0.504292	-0.987669
858	PC(22:4(7Z,10Z,13Z,16Z)/P-18:1(9Z))	2.56	level2			820.622	33.1	POS	C48H86NO7P	HMDB0008655			C00157	Lipids and lipid-like molecules	脂质和类脂分子	Glycerophospholipids	甘油磷脂类	Glycerophosphocholines	甘油磷酸胆碱	2.38509e-05	2.21526e-05	0.621099	0.207048	0.659215	0.629926	2.34116e-05	0.429722	0.70469	0.497111	0.962514	2.07546	1.05343
859	PC(22:4(7Z,10Z,13Z,16Z)/P-18:0)	2.56	level2			822.638	33.1	POS	C48H88NO7P	HMDB0008653				Lipids and lipid-like molecules	脂质和类脂分子	Glycerophospholipids	甘油磷脂类	Glycerophosphocholines	甘油磷酸胆碱	1.04612	0.88011	0.841698	0.922641	0.790251	0.432804	0.417889	0.546981	1.87083	0.0517149	0.962514	0.592843	-0.754278
860	(5alpha,8beta,9beta)-5,9-Epoxy-3,6-megastigmadien-8-ol	2.56	level2			209.153	16.5	POS	C13H20O2	HMDB0034672		69927-26-0		Organoheterocyclic compounds	有机杂环化合物	Benzopyrans	苯并吡喃	Benzopyrans		0.546257	0.459526	0.67479	0.560191	0.406097	0.423619	0.628365	0.486027	0.773899	0.478058	0.962514	0.86761	-0.204882
861	2-(1-Piperazinyl)nicotinonitrile	2.56	level2			189.114	9.3	POS	C10H12N4					Organoheterocyclic compounds	有机杂环化合物	Diazinanes		Piperazines		0.00587422	0.00576981	0.00843541	0.00669315	0.00398616	0.00420843	0.00801277	0.00540245	0.869447	0.457406	0.962514	0.807162	-0.30907
862	hexadecanedioic_acid_mono-L-carnitine_ester	2.56	level2			430.316	170.3	POS	C23H43NO6	HMDB0000712		42150-38-9		Lipids and lipid-like molecules	脂质和类脂分子	Fatty Acyls	脂肪酰类	Fatty acid esters	脂肪酸酯	0.0559227	0.0919741	0.0358046	0.0612338	0.036924	2.49534e-05	0.0603796	0.0324429	1.07211	0.297404	0.962514	0.529819	-0.916427
863	3,5-Di-O-galloyl-1,4-galactarolactone	2.56	level2			497.059	75.6	POS	C20H16O15	HMDB0037204				Organic acids and derivatives	有机酸及其衍生物	Carboxylic acids and derivatives	羧酸及衍生物	Tetracarboxylic acids and derivatives		0.392684	0.575768	0.419365	0.462606	0.399551	0.69176	0.605172	0.565494	1.07195	0.377595	0.962514	1.22241	0.289729
864	L-beta-aspartyl-L-threonine	2.55	level2			235.093	306.6	POS	C8H14N2O6	HMDB0011169				Organic acids and derivatives	有机酸及其衍生物	Peptidomimetics	拟肽类	Hybrid peptides	杂合肽	15.5874	7.11967	10.1879	10.965	16.7105	9.38254	17.5985	14.5638	0.909972	0.3731	0.962514	1.32821	0.409485
865	1-Isoquinolinethiol	2.55	level2			160.024	232.5	NEG	C9H7NS					Organoheterocyclic compounds	有机杂环化合物	Isoquinolines and derivatives		Isoquinolines and derivatives		0.131522	0.0918523	0.113036	0.112137	0.102094	0.124193	0.1266	0.117629	0.488246	0.71219	0.981229	1.04898	0.068983
866	2-(4-Bromophenyl)-4(3H)-quinazolinone	2.55	level2			298.986	230.5	NEG	C14H9BrN2O					Organoheterocyclic compounds	有机杂环化合物	Diazanaphthalenes	二氮杂萘	Benzodiazines	苯并二嗪	0.0101376	0.00971055	0.0108024	0.0102169	0.0104401	0.0102824	0.0129867	0.0112364	1.16945	0.335499	0.962514	1.09979	0.137229
867	N-[4-Nitro-3-(trifluoromethyl)phenyl]acetamide	2.55	level2			249.046	227	POS	C9H7F3N2O3					Benzenoids	苯环型化合物	Benzene and substituted derivatives	苯和取代衍生物	Anilides		0.163557	0.192949	0.165137	0.173881	0.149981	0.207653	0.149383	0.169006	0.289968	0.832143	0.99863	0.971963	-0.0410265
868	4-Hydroxy-2',4',6'-trimethoxychalcone	2.55	level2			313.112	218	NEG	C18H18O5					Phenylpropanoids and polyketides	苯丙素类和聚酮类	Linear 1,3-diarylpropanoids		Cinnamylphenols		0.251234	0.233017	0.284667	0.256306	0.293135	0.39922	0.299746	0.3307	1.66406	0.118268	0.962514	1.29026	0.367657
869	N-(4-Chlorophenyl)-1,3-benzothiazol-2-amine	2.55	level2			261.028	190.1	POS	C13H9ClN2S					Organoheterocyclic compounds	有机杂环化合物	Benzothiazoles		Benzothiazoles		0.0604129	0.0242972	0.0547864	0.0464988	0.032344	0.0474856	0.0444183	0.041416	0.194347	0.696799	0.977577	0.890688	-0.167008
870	6-Dimethylamino-4-ketohexanoic acid	2.55	level2			174.113	187.9	POS	C8H15NO3					Organic acids and derivatives	有机酸及其衍生物	Keto acids and derivatives	酮酸及衍生物	Medium-chain keto acids and derivatives	中链酮酸及衍生物	0.0272572	0.0427972	0.037166	0.0357402	0.0375122	0.0420924	0.0656399	0.0484148	1.37512	0.266618	0.962514	1.35463	0.437903
871	5-(4-Hydroxyphenyl)-5-phenylhydantoin	2.55	level2			267.074	183.6	NEG	C15H12N2O3	HMDB0041905		2784-27-2		Organoheterocyclic compounds	有机杂环化合物	Azolidines	氮杂环戊烷	Imidazolidines		0.0279339	0.0225758	0.0175505	0.0226867	0.017609	0.00781731	0.0446487	0.0233583	0.384886	0.955907	0.999955	1.0296	0.0420863
872	2-Chloro-4-morpholinothieno[3,2-d]pyrimidine-6-carbaldehyde	2.55	level2			284.029	169.6	POS	C11H10ClN3O2S					Organoheterocyclic compounds	有机杂环化合物	Thienopyrimidines		Thienopyrimidines		0.151814	0.0137294	0.0431222	0.0695552	0.0334661	0.346303	0.269234	0.216334	1.16245	0.227449	0.962514	3.11025	1.63703
873	Ethyl 2-(3-chloropyridin-2-yl)-5-oxopyrazolidine-3-carboxylate	2.55	level2			270.062	164.1	POS	C11H12ClN3O3					Organic acids and derivatives	有机酸及其衍生物	Carboxylic acids and derivatives	羧酸及衍生物	Amino acids, peptides, and analogues	氨基酸、肽和类似物	0.00687364	2.21526e-05	0.00526664	0.00405415	0.0060747	0.00787429	0.00530086	0.00641662	0.969553	0.344259	0.962514	1.58273	0.662415
874	3-Nitro-5,6-diphenylpyrazin-2-ol	2.55	level2			292.069	143.9	NEG	C16H11N3O3					Organic 1,3-dipolar compounds	有机1,3-偶极化合物	Allyl-type 1,3-dipolar organic compounds		Organic nitro compounds		0.0939072	0.078801	0.079305	0.0840044	0.0778798	0.0688688	0.0727704	0.073173	1.68094	0.125143	0.962514	0.871062	-0.199153
875	Ethanone, 2-(2-bromophenyl)-1-(1-pentyl-1H-indol-3-yl)-	2.55	level2			384.099	128.6	POS	C21H22BrNO					Organoheterocyclic compounds	有机杂环化合物	Indoles and derivatives	吲哚和衍生物	Phenylacetylindoles		0.0338618	0.0102677	0.198324	0.080818	0.201281	0.0561289	0.0996207	0.11901	0.961729	0.629086	0.967494	1.47257	0.558336
876	2-Chloro-4,5-dimethoxybenzoic acid	2.55	level2			215.014	72.8	NEG	C9H9ClO4					Benzenoids	苯环型化合物	Benzene and substituted derivatives	苯和取代衍生物	Benzoic acids and derivatives	苯甲酸及衍生物	0.330692	0.364312	0.320955	0.338653	0.3215	0.354446	0.392184	0.356043	0.869274	0.513419	0.962514	1.05135	0.0722459
877	Methyl 9H-purine-6-carboxylate	2.55	level2			177.04	64	NEG	C7H6N4O2					Organoheterocyclic compounds	有机杂环化合物	Imidazopyrimidines	咪唑并嘧啶	Purines and purine derivatives	嘌呤和嘌呤衍生物	0.121778	6.18187e-06	0.0866395	0.0694745	0.0782955	0.11612	0.100152	0.0981893	0.940255	0.489871	0.962514	1.41331	0.499082
878	5-(2-Chlorophenyl)-4-pyrimidinamine	2.55	level2			206.046	61.9	POS	C10H8ClN3					Organoheterocyclic compounds	有机杂环化合物	Diazines	二氮杂苯	Pyrimidines and pyrimidine derivatives	嘧啶类和嘧啶类衍生物	0.311405	0.231214	0.162565	0.235062	0.159323	0.0435961	0.22858	0.143833	1.20167	0.256669	0.962514	0.611895	-0.708644
879	5-(2-Phenylethyl)-1H-1,2,3,4-tetrazole	2.55	level2			173.081	48.4	NEG	C9H10N4					Benzenoids	苯环型化合物	Benzene and substituted derivatives	苯和取代衍生物	Benzene and substituted derivatives	苯和取代衍生物	0.128806	0.0168707	0.248893	0.131523	0.238629	0.266175	0.198009	0.234271	1.17817	0.215294	0.962514	1.78122	0.832864
880	PC(20:1(11Z)/P-18:1(11Z))	2.55	level2			798.635	33.3	POS	C46H88NO7P	HMDB0008326				Lipids and lipid-like molecules	脂质和类脂分子	Glycerophospholipids	甘油磷脂类	Glycerophosphocholines	甘油磷酸胆碱	0.768878	0.452033	0.4288	0.549903	0.539115	0.276644	0.15807	0.32461	1.49929	0.225063	0.962514	0.590303	-0.760472
881	Triciribine	2.55	level2			321.131	28.7	POS	C13H16N6O4					Organic oxygen compounds	有机含氧化合物	Organooxygen compounds	有机氧化合物	Carbohydrates and carbohydrate conjugates	碳水化合物和碳水化合物结合物	3.56229	3.06457	3.63892	3.42193	3.69993	3.15577	4.16609	3.67393	0.738147	0.503265	0.962514	1.07364	0.102515
882	Prostaglandin F2.alpha. dimethylamine	2.55	level2			368.316	16.9	POS	C22H41NO3					Organic oxygen compounds	有机含氧化合物	Organooxygen compounds	有机氧化合物	Alcohols and polyols		1.18835	1.1985	1.37762	1.25482	1.48888	1.66825	1.336	1.49771	1.6439	0.100152	0.962514	1.19356	0.255273
883	Symmetric_Dimethylarginine	2.55	level2			203.15	276	POS	C8H18N4O2	HMDB0003334		30344-00-4		Organic acids and derivatives	有机酸及其衍生物	Carboxylic acids and derivatives	羧酸及衍生物	Amino acids, peptides, and analogues	氨基酸、肽和类似物	4.57706	5.26979	10.5083	6.78506	10.5085	9.45732	4.79856	8.25479	0.592867	0.597454	0.96426	1.21661	0.282868
884	2-(2-Hydroxypropan-2-yl)-2,3-dihydro-7H-furo[3,2-g]chromen-7-one	2.54	level2			247.093	281.2	POS	C14H14O4	HMDB0030786		13849-08-6		Phenylpropanoids and polyketides	苯丙素类和聚酮类	Coumarins and derivatives	香豆素类及其衍生物	Furanocoumarins		0.42189	0.670508	0.732622	0.60834	0.828407	1.37566	0.471051	0.891705	0.915089	0.368242	0.962514	1.4658	0.551689
885	2-({2-[(2-Carboxyphenyl)sulfanyl]ethyl}sulfanyl)benzoic acid	2.54	level2			333.022	245.7	NEG	C16H14O4S2					Benzenoids	苯环型化合物	Benzene and substituted derivatives	苯和取代衍生物	Benzoic acids and derivatives	苯甲酸及衍生物	0.0924083	0.0875068	0.0852784	0.0883978	0.0874502	0.0968094	0.0901206	0.09146	0.9013	0.429846	0.962514	1.03464	0.0491304
886	6-Hydrazino-3-pyridazinecarboxamide	2.54	level2			154.074	232.5	POS	C5H7N5O					Organic acids and derivatives	有机酸及其衍生物	Carboxylic acids and derivatives	羧酸及衍生物	Carboxylic acid derivatives	羧酸衍生物	0.917524	0.875853	1.03804	0.943807	1.09128	0.968801	1.08654	1.04887	1.42389	0.170722	0.962514	1.11132	0.152279
887	1,3,4,5-Tetrahydrothiopyrano[4,3-b]indole	2.54	level2			188.056	228	NEG	C11H11NS					Organoheterocyclic compounds	有机杂环化合物	Indoles and derivatives	吲哚和衍生物	Indoles	吲哚	0.00774936	0.00278286	0.00496854	0.00516692	0.00335885	0.00553016	0.00512507	0.00467136	0.136488	0.770053	0.988755	0.90409	-0.145462
888	Ciprostene	2.54	level2			363.25	196	NEG	C22H36O4					Lipids and lipid-like molecules	脂质和类脂分子	Fatty Acyls	脂肪酰类	Eicosanoids	类花生酸	0.0179034	0.0215939	0.021893	0.0204634	0.0078974	0.0231406	0.0159025	0.0156468	0.957428	0.352789	0.962514	0.764624	-0.387177
889	N-Acetylglycylglycine	2.54	level2			173.056	183.2	NEG	C6H10N2O4					Organic acids and derivatives	有机酸及其衍生物	Carboxylic acids and derivatives	羧酸及衍生物	Amino acids, peptides, and analogues	氨基酸、肽和类似物	0.0566183	0.0577389	0.0423288	0.0522287	0.0480303	0.0515548	0.0410526	0.0468792	0.944192	0.41164	0.962514	0.897576	-0.155893
890	3-Cyano-6-methylchromone	2.54	level2			186.053	173.6	POS	C11H7NO2					Organoheterocyclic compounds	有机杂环化合物	Benzopyrans	苯并吡喃	1-benzopyrans	1-苯并吡喃	0.0493238	2.21526e-05	0.0740856	0.0411439	0.0752384	0.0340458	0.0594765	0.0562536	0.909083	0.576091	0.962912	1.36724	0.451267
891	N4,N5-Dimethyl-1H-imidazole-4,5-dicarboxamide	2.54	level2			181.071	169.4	NEG	C7H10N4O2					Organic acids and derivatives	有机酸及其衍生物	Carboxylic acids and derivatives	羧酸及衍生物	Carboxylic acid derivatives	羧酸衍生物	0.560619	0.0291844	0.105002	0.231602	0.104573	1.81354	0.886176	0.934762	1.2172	0.24851	0.962514	4.03607	2.01295
892	Phe-Met-Arg-Phe-amide	2.54	level2			597.303	157.3	NEG	C29H42N8O4S	HMDB0252425				Organic acids and derivatives	有机酸及其衍生物	Carboxylic acids and derivatives	羧酸及衍生物	Amino acids, peptides, and analogues	氨基酸、肽和类似物	0.0136601	0.0179697	0.00690262	0.0128442	0.00664727	0.00338155	0.014962	0.00833027	1.00548	0.392853	0.962514	0.648565	-0.624676
893	threo-Syringoylglycerol	2.54	level2			245.099	147.7	POS	C11H16O6	HMDB0031237		121748-11-6		Benzenoids	苯环型化合物	Phenols	酚类	Methoxyphenols		0.584168	0.477036	0.617745	0.55965	0.684293	0.544213	0.662461	0.630322	1.0446	0.309534	0.962514	1.12628	0.171566
894	Benz[a]anthracen-1-ol, 8-methoxy-3-methyl-	2.54	level2			289.126	144.9	POS	C20H16O2					Benzenoids	苯环型化合物	Phenanthrenes and derivatives		Phenanthrols		0.636619	0.496264	0.64592	0.592934	0.671111	0.636561	0.751317	0.68633	1.35478	0.189495	0.962514	1.15751	0.211029
895	8-Acetyl-7-hydroxy-4-methylcoumarin	2.54	level2			217.052	136.1	NEG	C12H10O4					Phenylpropanoids and polyketides	苯丙素类和聚酮类	Coumarins and derivatives	香豆素类及其衍生物	Hydroxycoumarins		0.0115597	0.00556213	0.0651991	0.0274403	0.0741629	0.0547397	0.0171047	0.0486691	1.02566	0.448595	0.962514	1.77364	0.82671
896	1H-Benz[e]indene-6-propanoic acid, dodecahydro-2-hydroxy-7-(1-hydroxy-1-methylethyl)-9b-(methoxycarbonyl)-2,3a,6,9a-tetramethyl-4-methylene-1,3-dioxo-	2.54	level2			477.248	46.8	NEG	C26H38O8					Lipids and lipid-like molecules	脂质和类脂分子	Fatty Acyls	脂肪酰类	Eicosanoids	类花生酸	6.87516e-06	0.0384571	0.00149148	0.0133185	0.0015416	0.00311454	0.0434118	0.0160226	0.924539	0.891432	0.999955	1.20304	0.266682
897	(2-aminoethoxy)[2-[docosa-4.7.10.13.16.19-hexaenoyloxy]-3-[hexadec-1-en-1-yloxy]propoxy]phosphinic acid	2.54	level2			746.51	35.1	NEG	C43H74NO7P	HMDB0005780		206059-97-4	C00350	Lipids and lipid-like molecules	脂质和类脂分子	Glycerophospholipids	甘油磷脂类	Glycerophosphoethanolamines	磷脂酰乙醇胺	1.52701	1.27492	0.54625	1.11606	0.598426	0.340255	0.352588	0.430423	1.80831	0.0884407	0.962514	0.385662	-1.37459
898	2,5-Dimethyl-3,4-diphenyl-2,4-cyclopentadien-1-one	2.54	level2			261.131	28	POS	C19H16O					Phenylpropanoids and polyketides	苯丙素类和聚酮类	Stilbenes		Stilbenes		8.8567	7.25452	9.50821	8.53981	9.38878	10.4286	11.1647	10.3273	1.63141	0.101818	0.962514	1.20932	0.274192
899	Dimethyl pimelate	2.54	level2			189.112	16.5	POS	C9H16O4					Lipids and lipid-like molecules	脂质和类脂分子	Fatty Acyls	脂肪酰类	Fatty acid esters	脂肪酸酯	0.158027	0.097407	0.180192	0.145209	0.158915	0.221576	0.0914815	0.157324	0.103478	0.800983	0.994125	1.08343	0.115612
900	1-Mercapto[1,2,4]triazolo[4,3-a]quinoxalin-4(5H)-one	2.54	level2			217.017	16.2	NEG	C9H6N4OS					Organoheterocyclic compounds	有机杂环化合物	Diazanaphthalenes	二氮杂萘	Benzodiazines	苯并二嗪	1.10165	1.00899	0.658313	0.922985	0.604528	0.368913	0.681246	0.551562	1.65589	0.0868779	0.962514	0.597585	-0.742783
901	N-Formyl-L-glutamate	2.54	level2			176.055	281.7	POS	C6H9NO5	HMDB0003470		1681-96-5	C01045	Organic acids and derivatives	有机酸及其衍生物	Carboxylic acids and derivatives	羧酸及衍生物	Amino acids, peptides, and analogues	氨基酸、肽和类似物	0.211002	0.134157	0.198873	0.181344	2.38091e-05	0.166767	0.176499	0.11443	0.876159	0.341482	0.962514	0.631009	-0.664267
902	Vinclozolin	2.54	level2			286.006	171.4	POS	C12H9Cl2NO3	HMDB0259811			C10981	Benzenoids	苯环型化合物	Benzene and substituted derivatives	苯和取代衍生物	Halobenzenes		0.0143042	0.00703559	0.00465351	0.00866442	0.00361325	0.0107688	0.00202735	0.00546981	1.06102	0.464695	0.962514	0.631296	-0.663612
903	L-Erythrulose	2.54	level2			119.034	159.1	NEG	C4H8O4	HMDB0006293		533-50-6	C02045	Organic oxygen compounds	有机含氧化合物	Organooxygen compounds	有机氧化合物	Carbohydrates and carbohydrate conjugates	碳水化合物和碳水化合物结合物	0.137382	0.155435	0.241129	0.177982	0.229552	0.133491	0.12184	0.161628	0.520085	0.744297	0.98473	0.908114	-0.139054
904	Lincomycin	2.54	level2			405.203	72.4	NEG	C18H34N2O6S	HMDB0251851				Organic acids and derivatives	有机酸及其衍生物	Carboxylic acids and derivatives	羧酸及衍生物	Amino acids, peptides, and analogues	氨基酸、肽和类似物	0.337077	0.356399	0.00809145	0.233856	0.00873586	0.104249	0.398999	0.170661	0.149037	0.717985	0.981587	0.729773	-0.454481
905	5-Bromo-6-chloro-1H-indazole	2.53	level2			228.92	284.2	NEG	C7H4BrClN2					Organoheterocyclic compounds	有机杂环化合物	Benzopyrazoles		Indazoles		0.0721923	6.18187e-06	0.0684613	0.0468866	6.30815e-06	0.0464888	0.0660639	0.0375197	0.0304371	0.77456	0.989558	0.800222	-0.321528
906	Fenarimol	2.53	level2			331.044	256.4	POS	C17H12Cl2N2O	HMDB0040599			C11226	Benzenoids	苯环型化合物	Benzene and substituted derivatives	苯和取代衍生物	Diphenylmethanes		98.7926	130.216	99.8374	109.615	91.0089	151.797	94.8369	112.547	0.104499	0.901267	0.999955	1.02675	0.0380848
907	1,3-Diaminopropane-N,N,N',N'-tetraacetic acid	2.53	level2			307.113	248.2	POS	C11H18N2O8					Organic acids and derivatives	有机酸及其衍生物	Carboxylic acids and derivatives	羧酸及衍生物	Tetracarboxylic acids and derivatives		0.0739494	0.130918	0.0648061	0.0898912	0.0670761	0.0689088	0.0680022	0.0679957	1.01726	0.400732	0.962514	0.756422	-0.402737
908	Florfenicol	2.53	level2			358.01	237.5	POS	C12H14Cl2FNO4S	HMDB0252314				Benzenoids	苯环型化合物	Benzene and substituted derivatives	苯和取代衍生物	Benzenesulfonyl compounds		0.172676	0.203272	0.203492	0.193147	0.197909	0.253937	0.198514	0.216787	1.16643	0.32747	0.962514	1.12239	0.166578
909	3-Cyclohexyl-2-sulfanyl-4(3H)-quinazolinone	2.53	level2			259.09	206.9	NEG	C14H16N2OS					Organoheterocyclic compounds	有机杂环化合物	Diazanaphthalenes	二氮杂萘	Benzodiazines	苯并二嗪	0.00414543	6.18187e-06	0.00658659	0.0035794	0.00635295	0.00583998	0.0117016	0.00796483	1.08813	0.177555	0.962514	2.22518	1.15392
910	sec-Butyltriphenylphosphonium cation	2.53	level2			319.165	148	POS	C22H24P					Benzenoids	苯环型化合物	Benzene and substituted derivatives	苯和取代衍生物	Phenylphosphines and derivatives		0.00385257	0.00333436	0.00387728	0.00368807	0.00473605	0.00544924	0.00297744	0.00438758	0.706766	0.406931	0.962514	1.18967	0.250558
911	2-[2-(2-Aminoethoxy)phenoxy]ethanamine	2.53	level2			197.128	141.4	POS	C10H16N2O2					Benzenoids	苯环型化合物	Phenol ethers	酚醚类	Phenol ethers		0.621273	0.605962	0.780627	0.669287	0.812255	0.544973	0.539632	0.632287	0.58385	0.744451	0.98473	0.944716	-0.0820467
912	3-Allyl-5-isobutylimidazolidine-2,4-dione	2.53	level2			195.113	140.9	NEG	C10H16N2O2					Organoheterocyclic compounds	有机杂环化合物	Azolidines	氮杂环戊烷	Imidazolidines		0.0657565	0.0590011	0.0808714	0.068543	0.0802914	0.0508037	0.0559147	0.0623366	0.774564	0.607799	0.964888	0.909453	-0.13693
913	4-{[4-(Acetyloxy)benzoyl]amino}benzoic acid	2.53	level2			298.069	104.3	NEG	C16H13NO5					Benzenoids	苯环型化合物	Benzene and substituted derivatives	苯和取代衍生物	Anilides		6.87516e-06	0.163154	0.145622	0.102928	0.137291	0.128015	6.43614e-06	0.0884375	0.0405826	0.841878	0.999015	0.859221	-0.218899
914	Methyl 3-hydroxy-4-nitrobenzoate	2.53	level2			196.028	101.2	NEG	C8H7NO5					Benzenoids	苯环型化合物	Benzene and substituted derivatives	苯和取代衍生物	Benzoic acids and derivatives	苯甲酸及衍生物	0.0230592	0.02167	0.0265808	0.02377	0.0260662	0.0146256	0.0167402	0.019144	1.33016	0.291058	0.962514	0.805386	-0.312248
915	2-[(2-Ethylbutanoyl)amino]-4,5-dimethoxybenzoic acid	2.53	level2			294.137	33.2	NEG	C15H21NO5					Benzenoids	苯环型化合物	Benzene and substituted derivatives	苯和取代衍生物	Benzoic acids and derivatives	苯甲酸及衍生物	0.0756326	0.0827298	0.163928	0.10743	0.165307	0.0657741	0.154333	0.128471	0.466671	0.645498	0.970838	1.19586	0.258048
916	8-Isobutanoylneosolaniol	2.53	level2			453.209	32	POS	C23H32O9	HMDB0038561		111112-48-2		Lipids and lipid-like molecules	脂质和类脂分子	Prenol lipids	异戊烯醇脂类	Sesquiterpenoids		0.381503	0.297778	0.34336	0.34088	0.312168	0.31671	2.34116e-05	0.209634	1.11764	0.289443	0.962514	0.614978	-0.701393
917	Tetraethylene glycol monomethyl ether	2.53	level2			209.138	24.7	POS	C9H20O5	HMDB0062236				Organic oxygen compounds	有机含氧化合物	Organooxygen compounds	有机氧化合物	Ethers	醚	1.02059	0.516866	0.768555	0.768669	0.692602	0.673595	1.0335	0.799898	0.262376	0.875207	0.999955	1.04063	0.057452
918	3-(Hepta-1,3-dienyl)hexanedioic acid	2.53	level2			239.128	17.7	NEG	C13H20O4					Lipids and lipid-like molecules	脂质和类脂分子	Fatty Acyls	脂肪酰类	Fatty acids and conjugates	脂肪酸和聚合物	0.524151	0.200072	0.231419	0.318547	0.351205	0.573267	0.587653	0.504042	1.3511	0.222297	0.962514	1.58231	0.662036
919	10-methylacridone	2.53	level2			210.087	242.6	POS	C14H11NO	HMDB0033000		719-54-0		Organoheterocyclic compounds	有机杂环化合物	Quinolines and derivatives	喹啉及衍生物	Benzoquinolines		0.415237	0.704261	0.535907	0.551802	0.499438	0.691386	0.530527	0.573784	0.416325	0.841096	0.998888	1.03984	0.0563571
920	Sparfloxacin	2.53	level2			197.09	211.7	POS	C19H22F2N4O3	HMDB0015339		110871-86-8	C07662	Organoheterocyclic compounds	有机杂环化合物	Quinolines and derivatives	喹啉及衍生物	Quinoline carboxylic acids	喹啉羧酸	0.911466	1.34171	0.887197	1.04679	0.899335	0.0832903	0.52099	0.501205	1.39257	0.12138	0.962514	0.478802	-1.0625
921	Gibberellin_A67	2.53	level2			349.166	156.9	POS	C19H24O6					Lipids and lipid-like molecules	脂质和类脂分子	Prenol lipids	异戊烯醇脂类	Diterpenoids	二萜类	0.00292076	0.0940516	0.0074566	0.0348096	0.007609	0.00743533	0.0703918	0.0284787	0.312937	0.870047	0.999955	0.818127	-0.289604
922	5-(4-Chlorophenyl)pyrazine-2,3-dicarbonitrile	2.52	level2			241.031	261.3	POS	C12H5ClN4					Benzenoids	苯环型化合物	Benzene and substituted derivatives	苯和取代衍生物	Halobenzenes		0.377915	0.214546	0.404104	0.332188	0.139991	0.482365	0.287486	0.303281	0.382881	0.814749	0.996848	0.912978	-0.131348
923	Pro-Leu	2.52	level2			229.155	216.3	POS	C11H20N2O3					Organic acids and derivatives	有机酸及其衍生物	Carboxylic acids and derivatives	羧酸及衍生物	Amino acids, peptides, and analogues	氨基酸、肽和类似物	1.33375	1.26396	3.58486	2.06086	3.66174	5.6289	1.2986	3.52975	0.882993	0.372943	0.962514	1.71276	0.77632
924	2-Amino-4,5,6,7-tetrahydro-1-benzothiophene-3-carboxylic acid	2.52	level2			198.061	184.6	POS	C9H11NO2S					Organoheterocyclic compounds	有机杂环化合物	Thiophenes		Aminothiophenes		0.339379	0.295621	0.291873	0.308958	0.24964	0.190203	0.337481	0.259108	1.10476	0.333998	0.962514	0.838653	-0.253854
925	3-Pyridinecarbonitrile, 1,2-dihydro-4-methyl-2-thioxo-6-(trifluoromethyl)-	2.52	level2			217.002	170.6	NEG	C8H5F3N2S					Organoheterocyclic compounds	有机杂环化合物	Pyridines and derivatives	吡啶及衍生物	3-pyridinecarbonitriles		0.459675	0.533477	0.356454	0.449869	0.317112	0.380791	0.431508	0.37647	1.05284	0.295765	0.962514	0.836845	-0.256967
926	1,3,5-Triazinane-2,4-dione	2.52	level2			116.047	169.3	POS	C3H5N3O2					Organoheterocyclic compounds	有机杂环化合物	Triazinanes		1,3,5-triazinanes		0.147295	2.21526e-05	0.152332	0.0998831	0.158085	2.49534e-05	0.147945	0.102018	0.0452077	0.977588	0.999955	1.02138	0.0305174
927	5-(2H-Chromen-3-ylmethylene)-2,4,6(1H,3H,5H)-pyrimidinetrione	2.52	level2			271.075	137.6	POS	C14H10N2O4					Organoheterocyclic compounds	有机杂环化合物	Benzopyrans	苯并吡喃	1-benzopyrans	1-苯并吡喃	0.0597775	0.0691404	0.0681819	0.0656999	0.0692841	0.0677388	0.0630876	0.0667035	0.346666	0.789083	0.992348	1.01527	0.0218702
928	6,7-Dimethoxyquinolin-4-ol	2.52	level2			204.066	56.2	NEG	C11H11NO3					Organoheterocyclic compounds	有机杂环化合物	Quinolines and derivatives	喹啉及衍生物	Quinolones and derivatives	喹诺酮及衍生物	0.715801	0.639921	0.367342	0.574355	0.387384	0.393621	0.635649	0.472218	0.714055	0.487468	0.962514	0.822172	-0.282489
929	6-Fluoronicotinic acid	2.52	level2			142.032	13.3	POS	C6H4FNO2					Organoheterocyclic compounds	有机杂环化合物	Pyridines and derivatives	吡啶及衍生物	Pyridinecarboxylic acids and derivatives	吡啶羧酸及衍生物	0.0131316	0.000601912	0.0004461	0.00472652	0.0150453	0.00930255	0.0104353	0.0115944	1.42747	0.206095	0.962514	2.45305	1.29457
930	leonurine	2.52	level2			312.156	11.2	POS	C14H21N3O5	HMDB0254014			C16985	Benzenoids	苯环型化合物	Benzene and substituted derivatives	苯和取代衍生物	Benzoic acids and derivatives	苯甲酸及衍生物	0.0697557	0.0843696	0.0903671	0.0814975	0.0878745	0.0728011	0.0781037	0.0795931	0.237153	0.813213	0.996468	0.976633	-0.0341119
931	MCPA	2.52	level2			181.009	199.3	NEG	C9H9ClO3	HMDB0254366	( 4 -氯-甲酚)乙酸	94-74-6	C18528	Benzenoids	苯环型化合物	Benzene and substituted derivatives	苯和取代衍生物	Phenoxyacetic acid derivatives	苯氧基乙酸衍生物	0.153167	0.140463	0.111116	0.134916	0.118371	0.120009	0.123169	0.120516	1.10172	0.366865	0.962514	0.893271	-0.162831
932	LPS(16:0)	2.52	level2			498.288	123.6	POS	C22H44NO9P	HMDB0240605	1-十六碳酰基-sn-甘油-3 -磷酸丝氨酸	116947-34-3		Lipids and lipid-like molecules	脂质和类脂分子	Glycerophospholipids	甘油磷脂类	Glycerophosphoserines	甘油磷酸丝氨酸	0.142584	0.142556	0.0424754	0.109205	0.0442693	0.0385893	0.29053	0.124463	0.202159	0.872915	0.999955	1.13971	0.188671
933	Carpinontriol B	2.51	level2			343.123	232	NEG	C19H20O6					Phenylpropanoids and polyketides	苯丙素类和聚酮类	Diarylheptanoids		Cyclic diarylheptanoids		0.00145028	0.00101922	0.00016964	0.000879715	0.00032907	0.00324487	0.00358919	0.00238771	0.972448	0.24244	0.962514	2.71418	1.44052
934	.alpha.-Naphthylthiourea	2.51	level2			203.066	219.6	POS	C11H10N2S	HMDB0243772			C19136	Benzenoids	苯环型化合物	Naphthalenes	萘类	Naphthalenes	萘类	0.151574	0.106874	0.144364	0.134271	2.38091e-05	0.12393	0.186279	0.103411	0.825366	0.613751	0.965094	0.770167	-0.376756
935	4-[(Phenylcarbonyl)amino]butanoic acid	2.51	level2			206.085	174.5	NEG	C11H13NO3					Organic acids and derivatives	有机酸及其衍生物	Carboxylic acids and derivatives	羧酸及衍生物	Amino acids, peptides, and analogues	氨基酸、肽和类似物	0.0261988	0.00738335	0.198999	0.077527	0.206644	0.0859192	0.0947869	0.129117	1.16575	0.514937	0.962514	1.66544	0.735905
936	Ethyl 2-amino-5-ethyl-3-thiophenecarboxylate	2.51	level2			200.077	160.7	POS	C9H13NO2S					Organoheterocyclic compounds	有机杂环化合物	Thiophenes		Thiophene carboxylic acids and derivatives		1.08292	0.846028	1.33907	1.08934	1.20558	1.05778	1.03115	1.09817	0.125574	0.956551	0.999955	1.00811	0.0116501
937	2-(2-Thienyl)-1H-phenanthro[9,10-d]imidazole	2.51	level2			299.069	41.8	NEG	C19H12N2S					Benzenoids	苯环型化合物	Phenanthrenes and derivatives		Phenanthrenes and derivatives		0.0185578	0.0341458	0.243234	0.098646	0.221584	0.202221	0.141418	0.188408	1.41043	0.304951	0.962514	1.90994	0.933525
938	Arachidonoyl-N,N-dimethylamide	2.51	level2			332.295	16.9	POS	C22H37NO					Lipids and lipid-like molecules	脂质和类脂分子	Fatty Acyls	脂肪酰类	Fatty amides	脂肪酸酰胺	0.174393	0.215123	0.228991	0.206169	0.212538	0.289072	0.186906	0.229505	0.711133	0.53909	0.962514	1.11319	0.154701
939	Aprobarbital	2.51	level2			211.105	206	POS	C10H14N2O3	HMDB0015441		28157	C07826	Organoheterocyclic compounds	有机杂环化合物	Diazines	二氮杂苯	Pyrimidines and pyrimidine derivatives	嘧啶类和嘧啶类衍生物	0.0494334	2.21526e-05	0.0424017	0.0306191	0.0447105	0.017895	0.049242	0.0372825	0.84708	0.733804	0.983503	1.21762	0.284068
940	Sphinganine	2.5	level2			302.304	225.8	POS	C18H39NO2	HMDB0000269		764-22-7	C00836	Organic nitrogen compounds	有机含氧化合物	Organonitrogen compounds	有机氧化合物	Amines	胺	0.178749	0.155024	0.149302	0.161025	0.282714	0.309839	0.307962	0.300171	2.1839	0.000377536	0.459316	1.86413	0.898504
941	Rabelomycin	2.5	level2			337.077	208.4	NEG	C19H14O6					Phenylpropanoids and polyketides	苯丙素类和聚酮类	Angucyclines		Angucyclines		0.00182571	0.00135255	0.00215439	0.00177755	0.00175011	6.39171e-06	0.00168788	0.00114813	1.03494	0.365164	0.962514	0.645904	-0.630609
942	Leucopterin	2.5	level2			196.048	186.1	POS	C6H5N5O3					Organoheterocyclic compounds	有机杂环化合物	Pteridines and derivatives		Pterins and derivatives		0.0137975	0.0577371	0.0281187	0.0332178	0.0303079	0.0329735	0.0171489	0.0268101	0.184518	0.667263	0.973366	0.807101	-0.309179
943	1H-3-Benzazepine-7,8-diol, 6-chloro-2,3,4,5-tetrahydro-1-phenyl-	2.5	level2			288.075	163.5	NEG	C16H16ClNO2					Organoheterocyclic compounds	有机杂环化合物	Benzazepines		Benzazepines		0.0137079	0.0262693	0.0297404	0.0232392	0.0253869	0.0168308	0.0161231	0.0194469	0.562375	0.542767	0.962514	0.836815	-0.25702
944	Cys-Tyr	2.5	level2			283.077	145	NEG	C12H16N2O4S											0.0594504	0.0289989	0.0733934	0.0539476	0.0570771	0.0575615	0.0459847	0.0535411	0.170231	0.977657	0.999955	0.992465	-0.0109113
945	LysoPC(18:4(6Z,9Z,12Z,15Z))	2.5	level2			516.305	119.7	POS	C26H46NO7P	HMDB0010389				Lipids and lipid-like molecules	脂质和类脂分子	Glycerophospholipids	甘油磷脂类	Glycerophosphocholines	甘油磷酸胆碱	0.429841	0.426162	0.368708	0.408237	0.400256	0.37926	2.34116e-05	0.259847	1.1096	0.371998	0.962514	0.636509	-0.651747
946	GKK 1032B	2.5	level2			500.276	110	NEG	C32H39NO4					Lipids and lipid-like molecules	脂质和类脂分子	Fatty Acyls	脂肪酰类	Eicosanoids	类花生酸	0.179556	0.0598014	6.34955e-06	0.079788	0.162038	0.164401	0.111873	0.146104	1.01844	0.298105	0.962514	1.83115	0.872752
947	Netilmicin	2.5	level2			476.306	32.3	POS	C21H41N5O7	HMDB0015090		56391-56-1	C07657	Organic oxygen compounds	有机含氧化合物	Organooxygen compounds	有机氧化合物	Carbohydrates and carbohydrate conjugates	碳水化合物和碳水化合物结合物	1.94757	1.83599	1.49392	1.75916	1.44006	1.64724	2.18577	1.75769	0.00677753	0.99576	0.999955	0.999162	-0.00120975
948	Dihydroconiferyl alcohol	2.5	level2			181.086	26.6	NEG	C10H14O3	HMDB0303757			C10448	Benzenoids	苯环型化合物	Phenols	酚类	Methoxyphenols		0.220719	0.130817	0.138529	0.163355	0.134294	0.0730497	0.133018	0.113454	1.37085	0.228779	0.962514	0.694524	-0.525903
949	Pipericine	2.5	level2			336.326	16.9	POS	C22H41NO	HMDB0302880				Lipids and lipid-like molecules	脂质和类脂分子	Fatty Acyls	脂肪酰类	Fatty amides	脂肪酸酰胺	8.79632	10.1715	10.4	9.78927	10.9113	12.3989	9.05684	10.789	0.886665	0.410448	0.962514	1.10212	0.140287
950	Candoxatril	2.5	level2			516.299	120.5	POS	C29H41NO7	HMDB0014754		118785-03-8		Benzenoids	苯环型化合物	Indanes		Indanes		0.414277	0.507353	0.36003	0.42722	0.411602	0.405095	0.912017	0.576238	0.94008	0.438392	0.962514	1.34881	0.431686
951	LPC(17:2)	2.5	level2			488.307	127.3	POS	C25H48NO7P	HMDB0256157	1-( 9Z , 12Z -十七碳二烯酰)-甘油-3 -磷酸胆碱			Lipids and lipid-like molecules	脂质和类脂分子	Glycerophospholipids	甘油磷脂类	Glycerophosphocholines	甘油磷酸胆碱	0.186901	0.145703	0.157758	0.163454	0.178429	0.183048	0.220492	0.19399	1.47318	0.166524	0.962514	1.18681	0.247093
952	6-Nitrocoumarin-3-carboxylic acid	2.49	level2			236.023	165.2	POS	C10H5NO6					Phenylpropanoids and polyketides	苯丙素类和聚酮类	Coumarins and derivatives	香豆素类及其衍生物	Coumarins and derivatives	香豆素类及其衍生物	0.0274807	2.21526e-05	0.0342953	0.0205994	2.38091e-05	0.029131	0.0205866	0.0165805	0.0256714	0.781957	0.990715	0.804901	-0.313117
953	Tyrosyl-Valine	2.49	level2			281.153	124.2	POS	C14H20N2O4	HMDB0029118				Organic acids and derivatives	有机酸及其衍生物	Carboxylic acids and derivatives	羧酸及衍生物	Amino acids, peptides, and analogues	氨基酸、肽和类似物	0.00565144	0.00540143	0.033509	0.014854	0.0324162	0.014142	0.0219121	0.0228234	1.13515	0.498743	0.962514	1.53652	0.619666
954	1-Stearoyl-2-arachidonoyl-sn-glycero-3-phospho-(1'-myo-inositol)	2.49	level2			885.545	116.8	NEG	C47H83O13P	HMDB0009815		206059-96-3								6.93015	9.04665	5.12631	7.03437	5.80515	2.69346	3.41606	3.97156	1.69956	0.105978	0.962514	0.564593	-0.824717
955	Ethyl 4-bromo-3,5-dimethyl-1H-pyrrole-2-carboxylate	2.49	level2			243.999	105.1	NEG	C9H12BrNO2					Organoheterocyclic compounds	有机杂环化合物	Pyrroles	吡咯	Pyrrole carboxylic acids and derivatives	吡咯羧酸及衍生物	0.0614407	0.0877323	0.00968643	0.0529532	0.00944156	0.00572073	0.0723726	0.0291783	0.817949	0.49259	0.962514	0.551021	-0.859822
956	2-[(3-Nitrobenzoyl)amino]benzoic acid	2.49	level2			285.054	54	NEG	C14H10N2O5					Benzenoids	苯环型化合物	Benzene and substituted derivatives	苯和取代衍生物	Anilides		0.00708422	0.0399043	0.01483	0.0206062	0.00986568	0.0514881	0.0350812	0.032145	0.862624	0.501606	0.962514	1.55997	0.641517
957	3-(Allylsulfanyl)-6-methyl-1,2,4-triazin-5-ol	2.49	level2			184.056	42.4	POS	C7H9N3OS					Organosulfur compounds	有机硫化合物	Thioethers		Aryl thioethers		0.347763	0.274347	0.414732	0.345614	0.404554	0.316587	0.551239	0.424126	1.00301	0.379519	0.962514	1.22717	0.295334
958	N'-[(1E)-(5-Chloro-2-hydroxyphenyl)methylene]-2-morpholin-4-ylacetohydrazide	2.49	level2			296.084	11.5	NEG	C13H16ClN3O3					Organic acids and derivatives	有机酸及其衍生物	Carboxylic acids and derivatives	羧酸及衍生物	Amino acids, peptides, and analogues	氨基酸、肽和类似物	0.0094048	0.0118307	0.0140215	0.0117523	0.0138656	0.00798171	0.00530627	0.00905118	1.15479	0.398128	0.962514	0.77016	-0.376769
959	Fluazifop	2.48	level2			328.081	256.2	POS	C15H12F3NO4	HMDB0252322			C18527	Benzenoids	苯环型化合物	Benzene and substituted derivatives	苯和取代衍生物	2-phenoxypropionic acids		0.285249	0.403645	0.303261	0.330718	0.281381	0.48628	0.280926	0.349529	0.229214	0.820532	0.997626	1.05688	0.07981
960	1-[(4-Nitrophenyl)sulfonyl]piperidine-4-carboxylic acid	2.48	level2			313.051	248.8	NEG	C12H14N2O6S					Benzenoids	苯环型化合物	Benzene and substituted derivatives	苯和取代衍生物	Benzenesulfonamides	苯磺酰胺	2.21348	2.24404	2.88284	2.44679	1.81335	3.97295	2.99104	2.92578	0.725493	0.508971	0.962514	1.19577	0.257934
961	N-Methyl-D-aspartic acid	2.48	level2			146.045	232.2	NEG	C5H9NO4	HMDB0002393		6384-92-5	C12269	Organic acids and derivatives	有机酸及其衍生物	Carboxylic acids and derivatives	羧酸及衍生物	Amino acids, peptides, and analogues	氨基酸、肽和类似物	6.87516e-06	6.18187e-06	0.0991365	0.0330498	0.0943593	0.103721	0.0967896	0.09829	1.60921	0.186214	0.962514	2.97399	1.5724
962	1-(4-Chlorophenyl)-5-(trifluoromethyl)-1H-pyrazole-4-carboxylic acid	2.48	level2			288.997	228.1	NEG	C11H6ClF3N2O2					Organoheterocyclic compounds	有机杂环化合物	Azoles	吡咯类	Pyrazoles	吡唑	0.0425858	6.18187e-06	0.0454474	0.0293464	0.0316383	0.0390379	0.0372423	0.0359728	0.899832	0.697607	0.977887	1.2258	0.293721
963	Heptanedioic acid, 1-(2-cyclopentylidenehydrazide)	2.48	level2			241.155	219.1	POS	C12H20N2O3					Lipids and lipid-like molecules	脂质和类脂分子	Fatty Acyls	脂肪酰类	Fatty acids and conjugates	脂肪酸和聚合物	0.325572	0.276253	0.504009	0.368611	0.503716	0.596991	0.259581	0.453429	0.566116	0.525463	0.962514	1.2301	0.298778
964	3-Bromo[1,1'-biphenyl]-4-ol	2.48	level2			246.98	201	NEG	C12H9BrO					Benzenoids	苯环型化合物	Benzene and substituted derivatives	苯和取代衍生物	Biphenyls and derivatives		0.0486345	0.0432173	0.0444931	0.0454483	0.0487505	0.0511438	0.0479968	0.049297	1.53325	0.111457	0.962514	1.08468	0.117274
965	4-Propyl-5-(2-thienyl)-4H-1,2,4-triazol-3-yl hydrosulfide	2.48	level2			224.031	182.7	NEG	C9H11N3S2					Organoheterocyclic compounds	有机杂环化合物	Azoles	吡咯类	Triazoles		0.00111379	6.18187e-06	0.00115285	0.000757606	0.0011958	0.00151152	0.00101764	0.00124165	0.98684	0.295622	0.962514	1.63891	0.712739
966	2,4-Thiazolidinedione, 5-[[4-[2-(2-thienyl)ethoxy]phenyl]methylene]-	2.48	level2			330.031	160.4	NEG	C16H13NO3S2					Benzenoids	苯环型化合物	Phenol ethers	酚醚类	Phenol ethers		0.00343704	0.00313545	0.00948809	0.00535353	0.00298129	0.00908856	6.43614e-06	0.00402543	1.0213	0.71445	0.981285	0.75192	-0.411348
967	7-Keto-8-aminopelargonic acid	2.48	level2			188.128	122.9	POS	C9H17NO3	HMDB0240687		682799-71-9	C01092	Lipids and lipid-like molecules	脂质和类脂分子	Fatty Acyls	脂肪酰类	Fatty acids and conjugates	脂肪酸和聚合物	2.38509e-05	0.0739327	0.0616254	0.045194	0.0940923	0.102863	2.34116e-05	0.0656594	0.0564667	0.636483	0.96931	1.45284	0.538872
968	Methyl (19.alpha.,20.alpha.)-11-methoxy-19-methyl-16,17-didehydrooxayohimban-16-carboxylate	2.48	level2			381.177	59.5	NEG	C22H26N2O4					Alkaloids and derivatives	生物碱和衍生物	Yohimbine alkaloids		Yohimbine alkaloids		0.10722	0.0370064	0.0673229	0.0705165	0.0629475	0.00653454	0.124941	0.0648077	0.649383	0.892831	0.999955	0.919042	-0.121797
969	Ethyl ethoxyacetate	2.48	level2			133.086	27.4	POS	C6H12O3					Organic acids and derivatives	有机酸及其衍生物	Carboxylic acids and derivatives	羧酸及衍生物	Carboxylic acid derivatives	羧酸衍生物	2.22913	2.04949	2.24509	2.17457	2.26487	2.34199	2.34116e-05	1.53563	1.08611	0.49327	0.962514	0.706176	-0.501901
970	Mebendazole	2.48	level2			294.09	257.2	NEG	C16H13N3O3	HMDB0014781		31431-39-7		Benzenoids	苯环型化合物	Benzene and substituted derivatives	苯和取代衍生物	Benzophenones		0.0234852	0.0221631	0.0291472	0.0249319	0.0247666	0.0214626	0.0258634	0.0240309	0.334981	0.738502	0.984009	0.963862	-0.0531015
971	Fenoxaprop	2.47	level2			334.052	256.6	POS	C16H12ClNO5	HMDB0252210				Benzenoids	苯环型化合物	Benzene and substituted derivatives	苯和取代衍生物	2-phenoxypropionic acids		0.188119	0.206048	0.148232	0.1808	0.15973	0.248546	0.149467	0.185914	0.0658435	0.893295	0.999955	1.02829	0.0402451
972	3-(4-Bromophenyl)-7-hydroxy-4H-chromen-4-one	2.47	level2			314.964	237.9	NEG	C15H9BrO3					Phenylpropanoids and polyketides	苯丙素类和聚酮类	Isoflavonoids		Isoflav-2-enes		0.0188061	0.00114869	0.00737609	0.0091103	0.00839314	0.00690776	0.0120218	0.00910758	0.572549	0.999622	0.99996	0.999702	-0.000430455
973	2-(3,5-Dichloro-4-hydroxybenzylidene)-1H-indene-1,3(2H)-dione	2.47	level2			318.988	229.6	POS	C16H8Cl2O3					Benzenoids	苯环型化合物	Indanes		Indanones		0.0597859	0.0801099	0.0722006	0.0706988	0.0552506	0.079058	0.0597596	0.0646894	0.61322	0.557264	0.962514	0.915	-0.128157
974	.beta.-Alanylleucine	2.47	level2			203.139	208.9	POS	C9H18N2O3					Organic acids and derivatives	有机酸及其衍生物	Peptidomimetics	拟肽类	Hybrid peptides	杂合肽	0.400035	0.440907	0.601779	0.480907	0.619697	0.593827	0.425549	0.546358	0.754109	0.491756	0.962514	1.1361	0.184087
975	3-Amino-2-hydroxyheptanoic acid	2.47	level2			162.112	207.7	POS	C7H15NO3					Organic acids and derivatives	有机酸及其衍生物	Carboxylic acids and derivatives	羧酸及衍生物	Amino acids, peptides, and analogues	氨基酸、肽和类似物	20.2698	24.9694	24.7349	23.3247	25.1786	40.7959	18.8953	28.2899	0.668906	0.499059	0.962514	1.21288	0.278432
976	PC(15:0/22:4(7Z,10Z,13Z,16Z))	2.47	level2			796.584	18.9	POS	C45H82NO8P	HMDB0007955				Lipids and lipid-like molecules	脂质和类脂分子	Glycerophospholipids	甘油磷脂类	Glycerophosphocholines	甘油磷酸胆碱	2.04937	1.99651	1.86607	1.97065	1.8241	1.77589	1.9627	1.85423	1.32297	0.210392	0.962514	0.940923	-0.0878515
977	N-[(4-Methylphenyl)sulfonyl]benzencarbothioamide	2.47	level2			290.033	16.2	NEG	C14H13NO2S2					Benzenoids	苯环型化合物	Benzene and substituted derivatives	苯和取代衍生物	Benzenesulfonamides	苯磺酰胺	4.3779	0.307345	3.6012	2.76215	4.73184	2.19609	5.50195	4.14329	0.876471	0.436218	0.962514	1.50003	0.584987
978	PC(20:4(8Z,11Z,14Z,17Z)/20:1(11Z))	2.47	level2			836.614	18.9	POS	C48H86NO8P	HMDB0008472				Lipids and lipid-like molecules	脂质和类脂分子	Glycerophospholipids	甘油磷脂类	Glycerophosphocholines	甘油磷酸胆碱	2.38509e-05	5.21685	5.71759	3.64482	5.55042	2.49534e-05	2.34116e-05	1.85016	0.775635	0.52814	0.962514	0.507612	-0.978202
979	Epoxytricarballylic acid	2.46	level2			189.004	269	NEG	C6H6O7					Organic acids and derivatives	有机酸及其衍生物	Carboxylic acids and derivatives	羧酸及衍生物	Tricarboxylic acids and derivatives		0.0181007	0.0128798	0.0164724	0.0158176	0.0177747	0.0141426	0.0115771	0.0144981	0.773138	0.607191	0.964888	0.916579	-0.125669
980	Carbendazim	2.46	level2			192.074	218.7	POS	C9H9N3O2	HMDB0031769		10605-21-7	C10897	Organoheterocyclic compounds	有机杂环化合物	Benzimidazoles		2-benzimidazolylcarbamic acid esters		0.371937	0.545384	0.64062	0.519314	0.872927	0.412103	0.528776	0.604602	0.458826	0.62038	0.965901	1.16423	0.21938
981	5-Chloro-2-(chloromethyl)-1,3-benzoxazole	2.46	level2			201.984	187.4	POS	C8H5Cl2NO					Organoheterocyclic compounds	有机杂环化合物	Benzoxazoles	苯并恶唑	Benzoxazoles	苯并恶唑	0.0369778	0.0561584	0.0550845	0.0494069	0.0555536	0.0447135	0.0413176	0.0471949	0.250276	0.784367	0.991375	0.955229	-0.0660817
982	Indoleacetaldehyde	2.46	level2			160.075	155.2	POS	C10H9NO	HMDB0001190		2591-98-2	C00637	Organoheterocyclic compounds	有机杂环化合物	Indoles and derivatives	吲哚和衍生物	Indoles	吲哚	0.0561986	0.0562744	0.0564083	0.0562938	0.124215	0.0945672	0.119663	0.112815	2.15123	0.0255782	0.962514	2.00405	1.00292
983	1H-Indol-4-ol, 3-[2-(dimethylamino)ethyl]-, 4-acetate	2.46	level2			247.144	111.6	POS	C14H18N2O2					Organoheterocyclic compounds	有机杂环化合物	Indoles and derivatives	吲哚和衍生物	Tryptamines and derivatives	色胺及衍生物	0.874939	0.693669	1.24129	0.936632	1.34093	1.32651	0.918481	1.19531	1.11676	0.290216	0.962514	1.27618	0.351828
984	2-Acetylamino-3-mercapto-3-methylbutyric acid	2.46	level2			190.054	109.6	NEG	C7H13NO3S	HMDB0255055				Organic acids and derivatives	有机酸及其衍生物	Carboxylic acids and derivatives	羧酸及衍生物	Amino acids, peptides, and analogues	氨基酸、肽和类似物	0.0394155	0.0367258	0.0396141	0.0385851	0.0360047	0.0371244	6.43614e-06	0.0243785	1.11228	0.363971	0.962514	0.63181	-0.662436
985	1,2-Distearoyl-sn-glycero-3-phospho-L-serine	2.46	level2			790.56	37.3	NEG	C42H82NO10P	HMDB0012378				Lipids and lipid-like molecules	脂质和类脂分子	Glycerophospholipids	甘油磷脂类	Glycerophosphoserines	甘油磷酸丝氨酸	0.0960929	0.107232	0.131435	0.111587	0.126414	0.0494866	0.101688	0.0925294	0.906811	0.48769	0.962514	0.829216	-0.270179
986	9-(Methoxycarbonyl)dec-9-enoic acid	2.46	level2			227.128	35.9	NEG	C12H20O4					Lipids and lipid-like molecules	脂质和类脂分子	Fatty Acyls	脂肪酰类	Fatty acids and conjugates	脂肪酸和聚合物	0.117405	6.18187e-06	0.0730805	0.0634973	0.0702028	0.0428911	0.106384	0.0731592	0.872165	0.815861	0.996909	1.15216	0.204343
987	3-Bromo-5-nitro-4-pyridinol	2.45	level2			216.928	263.2	NEG	C5H3BrN2O3					Organic 1,3-dipolar compounds	有机1,3-偶极化合物	Allyl-type 1,3-dipolar organic compounds		Organic nitro compounds		0.0313049	0.0259166	0.0217972	0.0263396	0.0231748	0.0165654	0.0293065	0.0230155	0.819939	0.509455	0.962514	0.873801	-0.194623
988	N-Nitroso-N-methyl-3-aminopropionic acid, methyl ester	2.45	level2			147.076	202.6	POS	C5H10N2O3					Organic acids and derivatives	有机酸及其衍生物	Carboxylic acids and derivatives	羧酸及衍生物	Carboxylic acid derivatives	羧酸衍生物	0.608408	0.613302	0.698727	0.640146	0.607559	0.63647	0.622148	0.622059	0.53577	0.584957	0.962912	0.971746	-0.0413488
989	L-Glutamic acid .gamma.-(.beta.-naphthylamide)	2.45	level2			271.106	179.6	NEG	C15H16N2O3					Organic acids and derivatives	有机酸及其衍生物	Carboxylic acids and derivatives	羧酸及衍生物	Amino acids, peptides, and analogues	氨基酸、肽和类似物	0.0224966	6.18187e-06	0.021166	0.0145563	0.0191445	0.0146836	0.0252266	0.0196849	0.916465	0.551606	0.962514	1.35233	0.435448
990	PC(22:4(7Z,10Z,13Z,16Z)/20:4(5Z,8Z,11Z,14Z))	2.45	level2			858.599	33.2	POS	C50H84NO8P	HMDB0008640				Lipids and lipid-like molecules	脂质和类脂分子	Glycerophospholipids	甘油磷脂类	Glycerophosphocholines	甘油磷酸胆碱	0.512818	1.155	0.995402	0.887739	0.868742	1.01019	0.930516	0.936482	0.575285	0.817058	0.997293	1.05491	0.0771168
991	4-[4-(Trifluoromethoxy)phenoxy]piperidine	2.44	level2			262.103	279.5	POS	C12H14F3NO2					Benzenoids	苯环型化合物	Phenol ethers	酚醚类	Phenol ethers		0.257501	0.197614	0.227215	0.227443	0.223288	0.261334	0.234607	0.239743	0.642294	0.58336	0.962912	1.05408	0.0759807
992	Benzonitrile, 2-[[(6-bromo-3H-imidazo[4,5-b]pyridin-2-yl)thio]methyl]-	2.44	level2			344.984	199.4	POS	C14H9BrN4S					Organoheterocyclic compounds	有机杂环化合物	Imidazopyridines		Imidazopyridines		0.759678	0.568222	0.457729	0.595209	0.381245	0.514413	0.429262	0.44164	1.44869	0.186426	0.962514	0.74199	-0.430527
993	3-Hydroxy-2-iodo-4-methoxybenzaldehyde	2.44	level2			278.952	180.8	POS	C8H7IO3					Benzenoids	苯环型化合物	Phenols	酚类	Methoxyphenols		1.92668	1.39305	2.00779	1.77584	1.79521	2.02262	1.73997	1.8526	0.430892	0.734814	0.98375	1.04323	0.0610517
994	1H-Indole-5-sulfonamide, 2,3-dihydro-N,N-dimethyl-2-oxo-3-[(4,5,6,7-tetrahydro-1H-indol-2-yl)methylene]-	2.44	level2			370.123	169.6	NEG	C19H21N3O3S					Organoheterocyclic compounds	有机杂环化合物	Indoles and derivatives	吲哚和衍生物	Indolines	吲哚啉	0.017174	0.00439232	0.00367331	0.00841322	0.00373965	0.0271841	0.0188476	0.0165905	0.895849	0.372099	0.962514	1.97195	0.979623
995	tras-4-Hydroxycinnamic acid sulfate	2.44	level2			242.996	105	NEG	C9H8O6S	HMDB0125166		151481-49-1		Phenylpropanoids and polyketides	苯丙素类和聚酮类	Cinnamic acids and derivatives	肉桂酸及其衍生物	Cinnamic acids		0.664781	0.916812	0.106374	0.562656	0.103467	0.069257	0.740589	0.304438	0.821605	0.470138	0.962514	0.541073	-0.886105
996	2-(Hydroxymethyl)-2-(octylamino)-1,3-propanediol	2.44	level2			234.206	38.1	POS	C12H27NO3					Organic nitrogen compounds	有机含氮化合物	Organonitrogen compounds	有机氮化合物	Amines	胺	2.38509e-05	0.124335	0.158868	0.0944088	2.38091e-05	2.49534e-05	2.34116e-05	2.4058e-05	1.50721	0.189509	0.962514	0.000254828	-11.9382
997	N1-(3-Aminopropyl)-N1-methylpropane-1,3-diamine	2.43	level2			146.165	188	POS	C7H19N3					Organic nitrogen compounds	有机含氮化合物	Organonitrogen compounds	有机氮化合物	Amines	胺	0.507636	0.370745	0.489163	0.455848	0.481011	0.542743	0.432125	0.485293	0.543777	0.611417	0.964967	1.06459	0.0903037
998	Tazarotenic acid sulfoxide	2.43	level2			340.099	144.5	POS	C19H17NO3S					Organoheterocyclic compounds	有机杂环化合物	Thiochromanes		Thiochromanes		0.123337	0.0801248	0.125004	0.109489	0.121782	0.102582	0.11096	0.111775	0.196725	0.891307	0.999955	1.02088	0.0298144
999	3-Isobutylpentanedioic acid	2.43	level2			187.097	40.7	NEG	C9H16O4					Lipids and lipid-like molecules	脂质和类脂分子	Fatty Acyls	脂肪酰类	Fatty acids and conjugates	脂肪酸和聚合物	1.93992	1.04191	2.63759	1.87314	2.62756	0.155869	1.98308	1.58884	0.755734	0.760876	0.987235	0.848223	-0.237485
1000	(2-aminoethoxy)[2-[hexadec-9-enoyloxy]-3-[octadeca-1.11-dien-1-yloxy]propoxy]phosphinic acid	2.43	level2			698.511	37.6	NEG	C39H74NO7P	HMDB0011405				Lipids and lipid-like molecules	脂质和类脂分子	Glycerophospholipids	甘油磷脂类	Glycerophosphoethanolamines	磷脂酰乙醇胺	0.177011	6.18187e-06	0.109898	0.0956385	0.107544	0.0339275	0.0545026	0.0653246	0.709996	0.617386	0.965579	0.683037	-0.549965
1001	Ticarcillin_disodium	2.42	level2			429.012	249.2	POS	C15H14N2Na2O6S2	HMDB0015545		34787-01-4	C07139	Organic acids and derivatives	有机酸及其衍生物	Carboxylic acids and derivatives	羧酸及衍生物	Amino acids, peptides, and analogues	氨基酸、肽和类似物	3.96795	2.72823	3.2141	3.30343	3.36133	2.42209	2.47481	2.75274	1.28858	0.30825	0.962514	0.833299	-0.263094
1002	2-(2-Chloro-6-fluorophenyl)acetohydrazide	2.42	level2			203.04	170.9	POS	C8H8ClFN2O					Benzenoids	苯环型化合物	Benzene and substituted derivatives	苯和取代衍生物	Phenylacetamides		0.151302	0.154354	0.191781	0.165812	0.174595	0.13178	0.174966	0.160447	0.317192	0.795413	0.993147	0.967642	-0.0474548
1003	25-Acetylvulgaroside	2.42	level2			479.296	121.6	POS	C27H42O7	HMDB0041365		172616-88-5		Lipids and lipid-like molecules	脂质和类脂分子	Prenol lipids	异戊烯醇脂类	Sesterterpenoids		0.877702	1.45513	0.519432	0.950755	0.550893	0.740123	1.19092	0.827313	0.222642	0.729015	0.982716	0.870164	-0.200641
1004	(2-aminoethoxy)[2-[icosa-5.8.11.14-tetraenoyloxy]-3-[octadec-11-enoyloxy]propoxy]phosphinic acid	2.42	level2			764.519	37.2	NEG	C43H76NO8P	HMDB0009036				Lipids and lipid-like molecules	脂质和类脂分子	Glycerophospholipids	甘油磷脂类	Glycerophosphoethanolamines	磷脂酰乙醇胺	0.176028	6.18187e-06	0.131237	0.102424	0.098081	0.114728	0.0937125	0.102174	0.852506	0.996669	0.99996	0.997561	-0.00352353
1005	PG(18:0/16:0)	2.42	level2			751.546	34.2	POS	C40H79O10P	HMDB0010600				Lipids and lipid-like molecules	脂质和类脂分子	Glycerophospholipids	甘油磷脂类	Glycerophosphoglycerols		2.38509e-05	0.403706	0.285781	0.229837	0.264449	0.0932148	0.107737	0.155134	0.826628	0.601107	0.964668	0.674972	-0.567101
1006	Resveratrol-3-O-sulfate	2.42	level2			309.046	14.1	POS	C14H12O6S	HMDB0041772				Phenylpropanoids and polyketides	苯丙素类和聚酮类	Stilbenes		Stilbenes		0.103589	0.0719823	0.16451	0.11336	0.188262	0.0905655	0.150957	0.143262	0.752422	0.48953	0.962514	1.26377	0.337734
1007	gossypol	2.42	level2			541.174	243.3	POS	C30H30O8	HMDB0040723		90141-22-3	C07667	Lipids and lipid-like molecules	脂质和类脂分子	Prenol lipids	异戊烯醇脂类	Sesquiterpenoids		0.10659	0.0811067	0.173436	0.120378	0.204465	0.132331	0.213303	0.183366	1.42689	0.169412	0.962514	1.52326	0.607163
1008	2,2',4,4'-Tetrahydroxybenzophenone	2.42	level2			245.048	109.1	NEG	C13H10O5	HMDB0244537				Benzenoids	苯环型化合物	Benzene and substituted derivatives	苯和取代衍生物	Benzophenones		1.2007	2.42445	0.69657	1.44057	0.0542994	6.39171e-06	0.0194459	0.0245839	1.70164	0.109879	0.962514	0.0170653	-5.87279
1009	PC(22:5(7Z,10Z,13Z,16Z,19Z)/20:4(8Z,11Z,14Z,17Z))	2.42	level2			856.583	33.2	POS	C50H82NO8P	HMDB0008707			C00157	Lipids and lipid-like molecules	脂质和类脂分子	Glycerophospholipids	甘油磷脂类	Glycerophosphocholines	甘油磷酸胆碱	2.38509e-05	0.64674	0.598222	0.414995	0.569489	2.49534e-05	0.649816	0.406444	0.0445588	0.978015	0.999955	0.979393	-0.0300398
1010	PG(16:0/18:0)	2.42	level2			751.551	15.4	POS	C40H79O10P	HMDB0010572				Lipids and lipid-like molecules	脂质和类脂分子	Glycerophospholipids	甘油磷脂类	Glycerophosphoglycerols		0.0466362	0.0753273	0.0476375	0.0565337	0.0602893	0.0991454	0.0193613	0.0595987	0.324074	0.907894	0.999955	1.05421	0.0761691
1011	2-(3-Carboxy-4-chlorophenyl)-1,3-dioxo-2,3-dihydro-1H-isoindole-5-carboxylic acid	2.41	level2			343.993	292.9	NEG	C16H8ClNO6					Organoheterocyclic compounds	有机杂环化合物	Isoindoles and derivatives		Isoindolines		2.08651	1.70067	1.91079	1.89932	1.83357	2.16971	2.34571	2.11633	1.16172	0.310633	0.962514	1.11426	0.156081
1012	3H-spiro[1,3-benzothiazole-2,3'-indol]-2'(1'H)-one	2.41	level2			253.043	232	NEG	C14H10N2OS					Organic acids and derivatives	有机酸及其衍生物	Carboxylic acids and derivatives	羧酸及衍生物	Amino acids, peptides, and analogues	氨基酸、肽和类似物	0.000809359	0.00143897	6.34955e-06	0.000751559	0.000599582	0.00100551	0.00111683	0.000907306	0.867934	0.743098	0.98473	1.20723	0.271704
1013	Asp-Ala	2.41	level2			203.067	227.2	NEG	C7H12N2O5					Organic acids and derivatives	有机酸及其衍生物	Carboxylic acids and derivatives	羧酸及衍生物	Amino acids, peptides, and analogues	氨基酸、肽和类似物	0.094349	0.0724406	0.100287	0.0890254	0.0979973	0.0886952	0.0912516	0.0926481	0.440614	0.705147	0.97951	1.04069	0.0575442
1014	N-Acetylsulfamethoxazole	2.41	level2			296.066	224.8	POS	C12H13N3O4S	HMDB0013854		21312-10-7	C13061	Benzenoids	苯环型化合物	Benzene and substituted derivatives	苯和取代衍生物	Benzenesulfonamides	苯磺酰胺	1.88097	1.54665	1.64521	1.69094	2.38091e-05	1.81133	1.6875	1.16629	0.85793	0.425972	0.962514	0.689725	-0.535907
1015	Pyrazinamide	2.41	level2			124.05	144.1	POS	C5H5N3O	HMDB0014483		98-96-4	C01956	Organoheterocyclic compounds	有机杂环化合物	Diazines	二氮杂苯	Pyrazines		0.357412	0.31475	0.382599	0.351587	0.383633	0.344706	0.325211	0.351183	0.116427	0.988444	0.999955	0.998851	-0.0016582
1016	3-O-Methylgallic acid	2.41	level2			183.029	42.2	NEG	C8H8O5					Benzenoids	苯环型化合物	Benzene and substituted derivatives	苯和取代衍生物	Benzoic acids and derivatives	苯甲酸及衍生物	0.240641	0.324965	0.262606	0.27607	0.257229	0.447009	0.222618	0.308952	0.382252	0.680488	0.975021	1.11911	0.162348
1017	2-amino-3-({[3-(hexadecanoyloxy)-2-(octadecanoyloxy)propoxy](hydroxy)phosphoryl}oxy)propanoic acid	2.41	level2			762.504	37.4	NEG	C40H78NO10P	HMDB0012356				Lipids and lipid-like molecules	脂质和类脂分子	Glycerophospholipids	甘油磷脂类	Glycerophosphoserines	甘油磷酸丝氨酸	0.150753	0.20919	0.136017	0.16532	0.0918609	0.150347	0.0970948	0.113101	1.49943	0.147462	0.962514	0.684134	-0.547649
1018	(2-aminoethoxy)[3-[hexadec-1-en-1-yloxy]-2-[icosa-5.8.11.14-tetraenoyloxy]propoxy]phosphinic acid	2.41	level2			722.51	36	NEG	C41H74NO7P	HMDB0011352		97859-69-3		Lipids and lipid-like molecules	脂质和类脂分子	Glycerophospholipids	甘油磷脂类	Glycerophosphoethanolamines	磷脂酰乙醇胺	0.272892	0.258156	0.236581	0.255876	0.256542	0.0906949	0.0702931	0.139177	1.66933	0.123264	0.962514	0.543922	-0.878528
1019	9H-Xanthene-9-propanoic acid, .alpha.-amino-.alpha.-[(1S,2S)-2-carboxycyclopropyl]-, (.alpha.S)-	2.41	level2			352.121	30	NEG	C20H19NO5					Organoheterocyclic compounds	有机杂环化合物	Benzopyrans	苯并吡喃	1-benzopyrans	1-苯并吡喃	0.102684	0.0755294	0.0846713	0.0876283	0.0773795	0.0569924	6.43614e-06	0.0447928	1.16826	0.155169	0.962514	0.511168	-0.968131
1020	PC(22:2(13Z,16Z)/0:0)	2.41	level2			576.395	25.1	POS	C30H58NO7P	HMDB0010400			C04230	Lipids and lipid-like molecules	脂质和类脂分子	Glycerophospholipids	甘油磷脂类	Glycerophosphocholines	甘油磷酸胆碱	2.38509e-05	0.402807	0.186472	0.196434	0.37073	0.369991	0.304939	0.348553	1.13643	0.268239	0.962514	1.7744	0.827334
1021	N1,N2-Diisopropylethanediamide	2.41	level2			173.128	25	POS	C8H16N2O2					Organic acids and derivatives	有机酸及其衍生物	Carboxylic acids and derivatives	羧酸及衍生物	Amino acids, peptides, and analogues	氨基酸、肽和类似物	1.73729	0.0143626	0.00860336	0.586753	0.934587	0.150309	0.0666197	0.383839	0.56989	0.766447	0.988351	0.654175	-0.612251
1022	N-(4-Chlorophenyl)-N'-(4-pyridinyl)urea	2.41	level2			248.059	15.8	POS	C12H10ClN3O					Benzenoids	苯环型化合物	Benzene and substituted derivatives	苯和取代衍生物	N-phenylureas		0.210939	0.136843	0.161212	0.169665	0.155945	0.158832	0.175694	0.16349	0.238445	0.798711	0.993797	0.963609	-0.0534808
1023	Isopentenyladenine	2.41	level2			202.108	101.1	NEG	C10H13N5	HMDB0245646			C04083	Organoheterocyclic compounds	有机杂环化合物	Imidazopyrimidines	咪唑并嘧啶	Purines and purine derivatives	嘌呤和嘌呤衍生物	0.0231731	0.0275873	0.0161765	0.0223123	0.0139595	0.0111183	0.0190188	0.0146989	1.51165	0.133052	0.962514	0.658779	-0.602134
1024	Nilutamide	2.4	level2			318.067	250.5	POS	C12H10F3N3O4	HMDB0014803		63612-50-0	C08164	Organoheterocyclic compounds	有机杂环化合物	Azolidines	氮杂环戊烷	Imidazolidines		0.679062	0.388572	0.851346	0.63966	0.861185	0.627923	0.412831	0.633979	0.123625	0.97723	0.999955	0.991119	-0.0128692
1025	2-(2,4-Dichlorophenyl)-3-[4-(dimethylamino)phenyl]acrylonitrile	2.4	level2			317.056	221.5	POS	C17H14Cl2N2					Phenylpropanoids and polyketides	苯丙素类和聚酮类	Stilbenes		Stilbenes		0.493029	0.102179	0.272763	0.289323	2.38091e-05	0.217369	2.34116e-05	0.0724722	1.56367	0.181788	0.962514	0.250488	-1.99718
1026	N-(3-Dimethylaminopropyl)-N'-ethylcarbodiimide	2.4	level2			156.149	187.6	POS	C8H17N3	HMDB0244825				Organic nitrogen compounds	有机含氮化合物	Organonitrogen compounds	有机氮化合物	Amines	胺	0.158326	0.192486	0.174579	0.175131	0.132024	0.226262	0.129465	0.162584	0.544739	0.725784	0.982317	0.928356	-0.107249
1027	Dimethyltin oxide	2.4	level2			166.951	177.5	POS	C2H6OSn											0.345681	0.354376	0.363473	0.35451	0.34832	0.439645	0.408327	0.398764	1.50934	0.180095	0.962514	1.12483	0.169708
1028	Cytochalasin B	2.4	level2			480.278	124	POS	C29H37NO5					Alkaloids and derivatives	生物碱和衍生物	Cytochalasans		Cytochalasins		0.138077	0.175939	0.0819807	0.131999	0.0504462	0.0410075	0.343225	0.144893	0.433779	0.906315	0.999955	1.09768	0.134464
1029	PG(16:1(9Z)/22:5(4Z,7Z,10Z,13Z,16Z))	2.4	level2			795.521	114.6	POS	C44H75O10P	HMDB0010597				Lipids and lipid-like molecules	脂质和类脂分子	Glycerophospholipids	甘油磷脂类	Glycerophosphoglycerols		0.545738	0.463077	0.516811	0.508542	0.476653	0.506001	0.536313	0.506323	0.033233	0.944049	0.999955	0.995635	-0.0063105
1030	(4E,6E)-8-(.beta.-D-Glucopyranosyloxy)-2,7-dimethylocta-4,6-dienoic acid	2.4	level2			345.154	69.9	NEG	C16H26O8					Lipids and lipid-like molecules	脂质和类脂分子	Saccharolipids		Saccharolipids		0.10964	0.0462549	0.134229	0.0967077	0.124774	0.0529479	0.0558727	0.0778648	0.632055	0.620614	0.965957	0.805157	-0.312658
1031	PC(15:0/22:1(11Z))	2.4	level2			802.627	19.3	POS	C45H88NO8P	HMDB0007952				Lipids and lipid-like molecules	脂质和类脂分子	Glycerophospholipids	甘油磷脂类	Glycerophosphocholines	甘油磷酸胆碱	0.778571	0.83592	1.3235	0.979331	1.55784	0.868046	0.596279	1.00739	0.177948	0.937155	0.999955	1.02865	0.0407521
1032	Jasmonic acid	2.4	level2			211.133	13.3	POS	C12H18O3	HMDB0032797		6894-38-8	C08491	Lipids and lipid-like molecules	脂质和类脂分子	Fatty Acyls	脂肪酰类	Lineolic acids and derivatives	亚油酸及衍生物	2.38509e-05	2.21526e-05	0.12699	0.0423455	0.136857	0.0751419	0.158279	0.123426	1.59673	0.174117	0.962514	2.91474	1.54337
1033	N, N-Diisopropyl-2-bromo-5-fluorobenzamide	2.4	level2			302.052	13.3	POS	C13H17BrFNO					Benzenoids	苯环型化合物	Benzene and substituted derivatives	苯和取代衍生物	Benzoic acids and derivatives	苯甲酸及衍生物	0.0993419	0.0414527	0.0761598	0.0723181	0.0757452	0.0222228	0.0580635	0.0520105	0.964852	0.427872	0.962514	0.71919	-0.475555
1034	PC(16:0/P-16:0)	2.4	level2			718.574	37	POS	C40H80NO7P	HMDB0007994				Lipids and lipid-like molecules	脂质和类脂分子	Glycerophospholipids	甘油磷脂类	Glycerophosphocholines	甘油磷酸胆碱	0.359083	0.291719	0.257934	0.302912	0.283875	0.204934	0.194461	0.227757	1.66244	0.140672	0.962514	0.751891	-0.411405
1035	2-Amino-3-(dimethylamino)propionic acid	2.39	level2			133.097	286.3	POS	C5H12N2O2					Organic acids and derivatives	有机酸及其衍生物	Carboxylic acids and derivatives	羧酸及衍生物	Amino acids, peptides, and analogues	氨基酸、肽和类似物	0.508573	1.4082	0.530447	0.815738	0.626769	0.701842	1.04319	0.790602	0.292623	0.941674	0.999955	0.969186	-0.0451551
1036	PG(18:2(9Z,12Z)/20:3(8Z,11Z,14Z))	2.39	level2			797.536	113.9	POS	C44H77O10P	HMDB0010654				Lipids and lipid-like molecules	脂质和类脂分子	Glycerophospholipids	甘油磷脂类	Glycerophosphoglycerols		0.629982	0.307783	0.657143	0.531636	0.582505	0.951529	0.1483	0.560778	0.358102	0.915451	0.999955	1.05482	0.0769913
1037	Carbamic acid, [(3,4-dichlorophenyl)methyl]-, (1S)-2,3-dihydro-1H-inden-1-yl ester	2.39	level2			336.053	76.1	POS	C17H15Cl2NO2					Benzenoids	苯环型化合物	Indanes		Indanes		2.41337	2.34924	2.35453e-05	1.58755	2.51707	2.74289	2.44741	2.56912	0.969658	0.341564	0.962514	1.6183	0.694479
1038	PG(16:1(9Z)/22:4(7Z,10Z,13Z,16Z))	2.39	level2			797.528	36.7	POS	C44H77O10P	HMDB0010596				Lipids and lipid-like molecules	脂质和类脂分子	Glycerophospholipids	甘油磷脂类	Glycerophosphoglycerols		1.34241	1.20019	0.957405	1.16667	0.947117	1.0021	0.901641	0.950285	1.58951	0.135781	0.962514	0.81453	-0.295961
1039	PC(18:1(9Z)/18:0)	2.39	level2			788.61	19.6	POS	C44H86NO8P	HMDB0008069			C00157	Lipids and lipid-like molecules	脂质和类脂分子	Glycerophospholipids	甘油磷脂类	Glycerophosphocholines	甘油磷酸胆碱	45.2968	46.6282	48.1768	46.7006	56.418	51.7103	2.34116e-05	36.0428	1.07475	0.61525	0.965181	0.771784	-0.373731
1040	N-Methyl-O-methyl-L-tyrosine	2.39	level2			210.113	12.8	POS	C11H15NO3					Organic acids and derivatives	有机酸及其衍生物	Carboxylic acids and derivatives	羧酸及衍生物	Amino acids, peptides, and analogues	氨基酸、肽和类似物	0.0289571	0.0313414	0.027699	0.0293325	0.0292738	2.49534e-05	2.34116e-05	0.00977407	1.68139	0.181315	0.962514	0.333216	-1.58547
1041	4,5-Dihydro-2-methylthiazole	2.39	level2			102.037	170.4	POS	C4H7NS	HMDB0029555		2346-00-1		Organoheterocyclic compounds	有机杂环化合物	Azolines	氮杂环戊烯	Thiazolines		0.172859	0.316617	0.0926355	0.194037	0.0960877	0.119984	0.199775	0.138616	0.603939	0.487958	0.962514	0.714377	-0.485243
1042	LysoPC(20:4(5Z,8Z,11Z,14Z))	2.39	level2			544.339	49	POS	C28H50NO7P	HMDB0010395		60701-99-7	C04230	Lipids and lipid-like molecules	脂质和类脂分子	Glycerophospholipids	甘油磷脂类	Glycerophosphocholines	甘油磷酸胆碱	2.38509e-05	2.21526e-05	0.798596	0.266214	0.841567	0.927569	2.34116e-05	0.58972	0.711138	0.461932	0.962514	2.21521	1.14744
1043	5-Chloro-2-fluorobenzamidine	2.38	level2			173.03	203.4	POS	C7H6ClFN2					Benzenoids	苯环型化合物	Benzene and substituted derivatives	苯和取代衍生物	Halobenzenes		0.187471	0.132688	0.160114	0.160091	0.214297	0.199354	0.200324	0.204658	1.667	0.0543561	0.962514	1.27839	0.354326
1044	Gamma-glutamyl-Lysine	2.38	level2			275.171	186.1	POS	C11H22N4O4	HMDB0028802		45234-03-5		Organic acids and derivatives	有机酸及其衍生物	Carboxylic acids and derivatives	羧酸及衍生物	Amino acids, peptides, and analogues	氨基酸、肽和类似物	0.00471348	0.0259804	0.0162252	0.0156397	0.0182056	0.00947575	0.00581454	0.0111653	0.416815	0.565974	0.962514	0.713908	-0.486191
1045	Fonsecin	2.38	level2			291.084	157.6	POS	C15H14O6	HMDB0034124		3748-39-8		Organoheterocyclic compounds	有机杂环化合物	Naphthopyrans		Naphthopyranones		0.0556811	0.0577137	0.0438131	0.0524027	0.0445723	0.0601966	0.0544463	0.0530717	0.173766	0.920449	0.999955	1.01277	0.0183038
1046	5-Sulfosalicylic acid	2.38	level2			216.98	130.7	NEG	C7H6O6S	HMDB0011725			C16199	Benzenoids	苯环型化合物	Benzene and substituted derivatives	苯和取代衍生物	Benzenesulfonic acids and derivatives		0.0294842	0.0328041	0.0121096	0.0247993	0.0119944	0.0145963	0.0324763	0.019689	0.530289	0.603974	0.964888	0.793932	-0.332912
1047	D-Saccharic acid 1,4-lactone	2.38	level2			191.019	46.8	NEG	C6H8O7	HMDB0041862		5027-63-4		Organoheterocyclic compounds	有机杂环化合物	Lactones		Gamma butyrolactones		0.318268	0.189467	0.195305	0.234346	0.170538	0.180846	0.259579	0.203654	0.642311	0.576448	0.962912	0.869031	-0.20252
1048	Metalaxyl	2.38	level2			280.154	144.5	POS	C15H21NO4	HMDB0031802			C10947	Organic acids and derivatives	有机酸及其衍生物	Carboxylic acids and derivatives	羧酸及衍生物	Amino acids, peptides, and analogues	氨基酸、肽和类似物	0.0122105	0.012865	0.0559347	0.0270034	0.056976	2.49534e-05	0.031635	0.0295453	0.763365	0.913286	0.999955	1.09413	0.129789
1049	PC(0:0/16:0)[U]	2.38	level2			496.34	52.7	POS	C24H50NO7P	HMDB0240262		66757-27-5		Lipids and lipid-like molecules	脂质和类脂分子	Glycerophospholipids	甘油磷脂类	Glycerophosphocholines	甘油磷酸胆碱	0.408383	2.21526e-05	3.0429	1.15043	1.37069	3.38868	2.62776	2.46237	1.11356	0.306638	0.962514	2.14039	1.09787
1050	Amlaic_acid	2.37	level2			653.093	255	POS	C27H24O19	HMDB0036349		17278-02-3		Phenylpropanoids and polyketides	苯丙素类和聚酮类	Tannins		Tannins		0.1338	0.133098	0.131116	0.132671	0.114144	0.165069	0.12878	0.135998	0.208821	0.846555	0.999293	1.02507	0.0357287
1051	5-[(4-Chlorobenzyl)sulfanyl]-1,3,4-thiadiazol-2-ylamine	2.37	level2			257.993	181	POS	C9H8ClN3S2					Organosulfur compounds	有机硫化合物	Thioethers		Aryl thioethers		0.241439	2.21526e-05	0.269676	0.170379	0.319829	0.341708	0.305429	0.322322	1.01325	0.216351	0.962514	1.89179	0.919754
1052	3-(1-Isobutyl-1H-tetraazol-5-yl)aniline	2.37	level2			218.139	169.1	POS	C11H15N5					Organoheterocyclic compounds	有机杂环化合物	Azoles	吡咯类	Tetrazoles		1.36751	2.24564	0.775872	1.46301	0.841409	3.02812	2.15081	2.00678	0.70353	0.516698	0.962514	1.37168	0.455945
1053	4-Acetyloxy-6-hydroxy-2-(2-hydroxypropan-2-yl)-4a,6-dimethyl-3,4,5,7,8,8a-hexahydro-2H-chromene-5-carboxylic acid	2.37	level2			343.171	163.6	NEG	C17H28O7					Organoheterocyclic compounds	有机杂环化合物	Benzopyrans	苯并吡喃	Benzopyrans		0.00280604	6.18187e-06	0.00481205	0.00254142	0.00373012	0.00380941	0.00403355	0.00385769	0.976739	0.44471	0.962514	1.51793	0.602102
1054	LysoPC(16:1(9Z))	2.37	level2			494.324	119.2	POS	C24H48NO7P	HMDB0010383		76790-27-7	C04230	Lipids and lipid-like molecules	脂质和类脂分子	Glycerophospholipids	甘油磷脂类	Glycerophosphocholines	甘油磷酸胆碱	11.2808	22.3725	14.2072	15.9535	13.0772	12.9549	18.9701	15.0007	0.0509763	0.817517	0.99734	0.940278	-0.0888411
1055	22-Hydroxymifepristone	2.37	level2			446.275	16.1	POS	C29H35NO3					Lipids and lipid-like molecules	脂质和类脂分子	Steroids and steroid derivatives	甾类和甾类衍生物	Oxosteroids		0.0757625	0.0728763	0.0962483	0.081629	0.101136	0.0899314	0.110567	0.100545	1.61665	0.116481	0.962514	1.23173	0.300684
1056	4-Hydroxy-2-naphthalenesulfonic acid	2.37	level2			223.006	13.5	NEG	C10H8O4S					Benzenoids	苯环型化合物	Naphthalenes	萘类	Naphthalene sulfonic acids and derivatives		0.686842	0.414942	0.679363	0.593716	0.625003	0.423785	6.43614e-06	0.349598	1.12541	0.299049	0.962514	0.588831	-0.764075
1057	Risedronic_acid	2.37	level2			284.012	176.6	POS	C7H11NO7P2	HMDB0015022		105462-24-6	C08233	Organic acids and derivatives	有机酸及其衍生物	Organic phosphonic acids and derivatives		Bisphosphonates		0.0995238	0.0286375	0.616446	0.248202	0.609978	0.310271	0.262879	0.394376	1.11997	0.533486	0.962514	1.58893	0.668054
1058	PC(22:6(4Z,7Z,10Z,13Z,16Z,19Z)/P-16:0)	2.37	level2			790.573	33.1	POS	C46H80NO7P	HMDB0008751			C00157	Lipids and lipid-like molecules	脂质和类脂分子	Glycerophospholipids	甘油磷脂类	Glycerophosphocholines	甘油磷酸胆碱	2.38509e-05	0.871853	0.834852	0.568909	0.787569	0.837682	0.702156	0.775802	1.06012	0.543903	0.962514	1.36367	0.44749
1059	(3beta,5alpha,6beta,22E,24R)-23-Methylergosta-7,22-diene-3,5,6-triol	2.37	level2			445.368	15.8	POS	C29H48O3	HMDB0033633		243449-54-9		Lipids and lipid-like molecules	脂质和类脂分子	Steroids and steroid derivatives	甾类和甾类衍生物	Ergostane steroids		1.0527	1.48263	0.600326	1.04522	0.516929	0.880992	0.297267	0.565062	1.41349	0.19212	0.962514	0.540616	-0.887324
1060	N-cis-Tetradec-9-enoyl-L-homoserine lactone	2.36	level2			310.236	317.1	POS	C18H31NO3					Organic acids and derivatives	有机酸及其衍生物	Carboxylic acids and derivatives	羧酸及衍生物	Amino acids, peptides, and analogues	氨基酸、肽和类似物	0.202822	0.190355	0.205756	0.199644	0.201307	0.211157	0.198826	0.203763	0.701054	0.532668	0.962514	1.02063	0.0294611
1061	2-(2-Methoxyethoxy)ethanamine	2.36	level2			120.102	212.2	POS	C5H13NO2					Organic oxygen compounds	有机含氧化合物	Organooxygen compounds	有机氧化合物	Ethers	醚	0.273561	0.198806	0.120618	0.197662	0.0961688	0.145967	0.138681	0.126939	1.32962	0.205314	0.962514	0.642202	-0.638901
1062	(E)-3,10-Dihydroxy-4,9-dimethyldodec-6-enedioic acid	2.36	level2			287.149	210.8	NEG	C14H24O6					Organic acids and derivatives	有机酸及其衍生物	Hydroxy acids and derivatives	羟基酸及衍生物	Medium-chain hydroxy acids and derivatives	中链羟基酸及衍生物	0.00287211	0.00108954	0.00340908	0.00245691	0.00349347	0.00106428	6.43614e-06	0.0015214	1.14416	0.495103	0.962514	0.619233	-0.691445
1063	4-Amino-5-(4-bromophenyl)-4H-1,2,4-triazole-3-thiol	2.36	level2			268.952	146.5	NEG	C8H7BrN4S					Organoheterocyclic compounds	有机杂环化合物	Azoles	吡咯类	Triazoles		0.00515652	0.00452542	0.00507852	0.00492015	0.00539634	6.39171e-06	0.00392131	0.00310801	1.0579	0.376789	0.962514	0.63169	-0.66271
1064	PC(20:3(5Z,8Z,11Z)/14:0)	2.36	level2			756.553	36.7	POS	C42H78NO8P	HMDB0008361				Lipids and lipid-like molecules	脂质和类脂分子	Glycerophospholipids	甘油磷脂类	Glycerophosphocholines	甘油磷酸胆碱	11.783	30.9238	12.9475	18.5514	11.7035	11.7953	32.2223	18.5737	0.0730952	0.998188	0.99996	1.0012	0.00173057
1065	PC(16:1(9Z)/22:6(4Z,7Z,10Z,13Z,16Z,19Z))	2.36	level2			804.553	19	POS	C46H78NO8P	HMDB0008023				Lipids and lipid-like molecules	脂质和类脂分子	Glycerophospholipids	甘油磷脂类	Glycerophosphocholines	甘油磷酸胆碱	0.825504	0.778235	0.843118	0.815619	0.756996	1.01011	0.984384	0.917163	1.22806	0.286946	0.962514	1.1245	0.169283
1066	[1,2,4]Triazolo[1,5-a]pyrimidine-2-carboxylic acid, 1,7-dihydro-5-methyl-7-oxo-, ethyl ester	2.35	level2			221.066	226.3	NEG	C9H10N4O3					Organoheterocyclic compounds	有机杂环化合物	Triazolopyrimidines		Triazolopyrimidines		0.0336656	0.019934	0.0346019	0.0294005	0.0394692	0.0369564	0.0282865	0.034904	0.845476	0.398382	0.962514	1.18719	0.247552
1067	3-O-Feruloylquinic acid	2.35	level2			367.104	173.7	NEG	C17H20O9	HMDB0030669		62929-69-5	C02572	Organic oxygen compounds	有机含氧化合物	Organooxygen compounds	有机氧化合物	Alcohols and polyols		0.737402	0.520543	0.759886	0.672611	0.810969	0.538338	0.770145	0.706484	0.22915	0.781435	0.990715	1.05036	0.0708851
1068	PC(20:4(5Z,8Z,11Z,14Z)/14:0)	2.35	level2			754.539	18.9	POS	C42H76NO8P	HMDB0008426			C00157	Lipids and lipid-like molecules	脂质和类脂分子	Glycerophospholipids	甘油磷脂类	Glycerophosphocholines	甘油磷酸胆碱	0.0959919	0.221674	0.190069	0.169245	0.101911	0.143682	0.24575	0.163781	0.0497275	0.928253	0.999955	0.967715	-0.0473452
1069	2-{[(2-Oxo-2H-chromen-3-yl)carbonyl]amino}benzoic acid	2.34	level2			310.071	256.2	POS	C17H11NO5					Benzenoids	苯环型化合物	Benzene and substituted derivatives	苯和取代衍生物	Anilides		0.221857	0.313162	0.245074	0.260031	0.227825	0.360724	0.235556	0.274702	0.339342	0.788076	0.992058	1.05642	0.0791819
1070	Oleic acid	2.34	level1			281.247	18.9	NEG	C18H34O2	HMDB0000207	油酸	112-80-1	C00712	Lipids and lipid-like molecules	脂质和类脂分子	Fatty Acyls	脂肪酰类	Fatty acids and conjugates	脂肪酸和聚合物	0.041948	0.0362652	0.0316131	0.0366088	0.0280775	0.0216051	0.0217207	0.0238011	2.03221	0.0252287	0.962514	0.650148	-0.62116
1071	(3-(Hexopyranosyloxy)-2-((2Z)-pent-2-en-1-yl)cyclopentyl)acetic acid	2.34	level2			373.185	41.9	NEG	C18H30O8					Lipids and lipid-like molecules	脂质和类脂分子	Fatty Acyls	脂肪酰类	Fatty acyl glycosides	脂肪酰基糖苷	0.273512	0.0514941	0.202263	0.175756	0.189908	0.0999352	0.210718	0.166854	0.160007	0.909738	0.999955	0.949347	-0.0749927
1072	SM(d18:1/20:0)	2.34	level2			759.636	97.2	POS	C43H87N2O6P	HMDB0012102		121999-68-6	C00550	Lipids and lipid-like molecules	脂质和类脂分子	Sphingolipids	鞘脂类	Phosphosphingolipids	鞘磷脂	2.20883	2.21526e-05	1.41064	1.2065	0.679461	0.365388	1.41571	0.820185	0.742027	0.618547	0.96566	0.679807	-0.556802
1073	PC(18:4(6Z,9Z,12Z,15Z)/20:3(8Z,11Z,14Z))	2.34	level2			804.552	34.8	POS	C46H78NO8P	HMDB0008244				Lipids and lipid-like molecules	脂质和类脂分子	Glycerophospholipids	甘油磷脂类	Glycerophosphocholines	甘油磷酸胆碱	1.63887	1.74761	1.65684	1.68111	1.31006	2.49534e-05	2.34116e-05	0.436702	1.70578	0.103377	0.962514	0.25977	-1.94469
1074	5alpha-Androst-16-en-3alpha-ol	2.34	level2			257.227	14.1	POS	C19H30O	HMDB0005935		1153-51-1		Lipids and lipid-like molecules	脂质和类脂分子	Steroids and steroid derivatives	甾类和甾类衍生物	Androstane steroids		0.00549852	0.00429576	0.00713113	0.0056418	0.00714835	0.00430896	0.00565003	0.00570245	0.0119737	0.960842	0.999955	1.01075	0.0154249
1075	3,3',5,5'-Tetraisopropylbiphenyl-4,4'-diol	2.33	level2			355.263	132.9	POS	C24H34O2					Benzenoids	苯环型化合物	Benzene and substituted derivatives	苯和取代衍生物	Biphenols		2.38509e-05	2.21526e-05	0.000553471	0.000199825	0.00121042	0.000188538	0.00201161	0.00113686	1.56758	0.167451	0.962514	5.68926	2.50824
1076	(1-Amino-3-methyl-1,3-dihydrobenzoimidazol-2-ylidene)cyanoacetic acid ethyl ester	2.33	level2			259.115	132.8	POS	C13H14N4O2					Organoheterocyclic compounds	有机杂环化合物	Benzimidazoles		Benzimidazoles		0.673749	0.465324	0.650454	0.596509	0.697805	0.725118	0.86729	0.763404	1.53986	0.118857	0.962514	1.27979	0.355903
1077	Sinefungin	2.33	level2			380.173	102.8	NEG	C15H23N7O5					Nucleosides, nucleotides, and analogues	核苷、核苷酸和类似物	5'-deoxyribonucleosides		5'-deoxyribonucleosides		0.15245	0.100104	0.0924305	0.114995	0.0932379	6.39171e-06	0.153788	0.0823442	1.00923	0.538019	0.962514	0.716069	-0.48183
1078	2-Deoxyribose 5-phosphate	2.33	level2			213.016	40.4	NEG	C5H11O7P					Organic acids and derivatives	有机酸及其衍生物	Organic phosphoric acids and derivatives	有机磷酸及衍生物	Phosphate esters	磷酸酯	0.163712	0.17607	0.115909	0.151897	0.129149	0.248632	0.189158	0.188979	0.958315	0.396263	0.962514	1.24413	0.315135
1079	PC(18:1(11Z)/15:0)	2.33	level2			746.568	37.1	POS	C41H80NO8P	HMDB0008066			C00157	Lipids and lipid-like molecules	脂质和类脂分子	Glycerophospholipids	甘油磷脂类	Glycerophosphocholines	甘油磷酸胆碱	2.45582	2.70641	2.46412	2.54212	2.68255	2.19781	2.61253	2.49763	0.34611	0.808848	0.995243	0.982501	-0.0254688
1080	2-Propylglutaric acid	2.33	level2			173.081	33.7	NEG	C8H14O4	HMDB0060684			C16658	Lipids and lipid-like molecules	脂质和类脂分子	Fatty Acyls	脂肪酰类	Fatty acids and conjugates	脂肪酸和聚合物	0.0747409	0.0201734	0.126931	0.0739484	0.140045	0.060509	0.133107	0.11122	0.935966	0.403764	0.962514	1.50403	0.588832
1081	2-(Dipentylamino)-2-(hydroxymethyl)-1,3-propanediol	2.33	level2			262.237	27.9	POS	C14H31NO3					Organic nitrogen compounds	有机含氮化合物	Organonitrogen compounds	有机氮化合物	Amines	胺	0.301253	0.261326	0.336093	0.299557	0.210362	0.23387	0.287977	0.24407	1.39865	0.153312	0.962514	0.814768	-0.295538
1082	SM(d18:1/22:0)	2.33	level2			787.667	98.6	POS	C45H91N2O6P	HMDB0012103		94359-12-3								1.04565	1.93533	0.991286	1.32409	0.814351	0.289587	0.757773	0.620571	1.59991	0.113506	0.962514	0.468678	-1.09333
1083	SM(d16:1/24:1(15Z))	2.33	level2			785.652	94.8	POS	C45H89N2O6P					Organic nitrogen compounds	有机含氮化合物	Organonitrogen compounds	有机氮化合物	Quaternary ammonium salts	季铵盐	1.54843	2.21526e-05	1.18705	0.911834	1.40068	0.968435	0.761396	1.04351	0.878748	0.806865	0.994799	1.1444	0.194595
1084	HERALENOL	2.33	level2			303.088	71.6	NEG	C16H16O6	HMDB0030745		26091-76-9		Phenylpropanoids and polyketides	苯丙素类和聚酮类	Coumarins and derivatives	香豆素类及其衍生物	Furanocoumarins		0.000956674	0.00151703	0.00205526	0.00150965	0.00153906	0.000401468	0.00108105	0.00100719	1.08165	0.334249	0.962514	0.667168	-0.583879
1085	PC(20:3(5Z,8Z,11Z)/15:0)	2.33	level2			770.568	19.2	POS	C43H80NO8P	HMDB0008363				Lipids and lipid-like molecules	脂质和类脂分子	Glycerophospholipids	甘油磷脂类	Glycerophosphocholines	甘油磷酸胆碱	0.758025	1.66783	0.753593	1.05982	0.680633	0.761876	2.19611	1.21287	0.271278	0.804407	0.994629	1.14442	0.194618
1086	Mangiferdesmethylursanone	2.33	level2			429.373	16.1	POS	C29H48O2	HMDB0036018		259144-62-2		Organic oxygen compounds	有机含氧化合物	Organooxygen compounds	有机氧化合物	Alcohols and polyols		10.1835	2.21526e-05	5.72409	5.30255	5.03692	9.44898	3.37505	5.95365	0.881108	0.859892	0.999843	1.12279	0.167089
1087	Meta-Tyrosine	2.33	level2			182.081	12.7	POS	C9H11NO3	HMDB0059720				Organic acids and derivatives	有机酸及其衍生物	Carboxylic acids and derivatives	羧酸及衍生物	Amino acids, peptides, and analogues	氨基酸、肽和类似物	0.0464463	0.0539077	0.0609603	0.0537714	0.0611917	0.0537442	0.0564975	0.0571445	0.807965	0.514396	0.962514	1.06273	0.0877739
1088	Dye X-27237-115	2.32	level2			328.039	135.7	NEG	C17H12ClNO4											0.0139107	0.0128104	0.0155628	0.0140946	0.015586	0.0121349	0.0119252	0.0132153	0.820901	0.572198	0.962514	0.937614	-0.0929334
1089	2-Methyl-3-[(tetrahydro-2-furanylcarbonyl)amino]benzoic acid	2.32	level2			248.095	123.5	NEG	C13H15NO4					Benzenoids	苯环型化合物	Benzene and substituted derivatives	苯和取代衍生物	Benzoic acids and derivatives	苯甲酸及衍生物	0.221451	0.0790369	6.34955e-06	0.100165	6.30815e-06	0.473019	0.569054	0.34736	0.275267	0.257653	0.962514	3.46789	1.79406
1090	Niflumic acid	2.32	level2			281.053	72	NEG	C13H9F3N2O2	HMDB0015573		4394-00-7	C13698	Benzenoids	苯环型化合物	Benzene and substituted derivatives	苯和取代衍生物	Trifluoromethylbenzenes		0.585775	0.665609	0.750159	0.667181	0.740795	0.548383	0.571069	0.620082	0.751133	0.574098	0.962912	0.929406	-0.105618
1091	Mesotrione	2.32	level2			340.047	101.9	POS	C14H13NO7S	HMDB0254481				Organic oxygen compounds	有机含氧化合物	Organooxygen compounds	有机氧化合物	Carbonyl compounds	羰基化合物	1.11096	0.972487	1.12158	1.06834	1.05728	1.26622	1.13186	1.15179	1.08302	0.343538	0.962514	1.07811	0.108502
1092	SM(d17:1/24:1(15Z))	2.32	level2			799.668	92.7	POS	C46H91N2O6P					Organic nitrogen compounds	有机含氮化合物	Organonitrogen compounds	有机氮化合物	Quaternary ammonium salts	季铵盐	1.36423	1.50084	0.685219	1.18343	1.06717	0.617172	0.607703	0.764015	1.34971	0.227203	0.962514	0.645593	-0.631302
1093	Histidinyl-Valine	2.32	level2			255.145	76.2	POS	C11H18N4O3					Organic acids and derivatives	有机酸及其衍生物	Carboxylic acids and derivatives	羧酸及衍生物	Amino acids, peptides, and analogues	氨基酸、肽和类似物	0.0746741	0.148807	0.170839	0.13144	0.162343	0.31273	0.204212	0.226429	1.57205	0.150032	0.962514	1.72267	0.784649
1094	PC(20:2(11Z,14Z)/18:1(9Z))	2.32	level2			812.614	65.7	POS	C46H86NO8P	HMDB0008334				Lipids and lipid-like molecules	脂质和类脂分子	Glycerophospholipids	甘油磷脂类	Glycerophosphocholines	甘油磷酸胆碱	8.71277	9.78583	10.5245	9.67437	11.0929	15.9907	2.34116e-05	9.02787	1.03626	0.904121	0.999955	0.933174	-0.0997819
1095	1H-Benzimidazole, 1-[(2-chloro-5-nitrophenyl)sulfonyl]-2-methyl-	2.31	level2			352.018	236.6	POS	C14H10ClN3O4S					Benzenoids	苯环型化合物	Benzene and substituted derivatives	苯和取代衍生物	Benzenesulfonamides	苯磺酰胺	0.0143387	0.0125199	0.0140066	0.0136217	2.38091e-05	0.029079	2.34116e-05	0.00970875	1.40773	0.725501	0.982317	0.712742	-0.488549
1096	5-(2-Aminoethyl)-1H-imidazol-2-amine	2.31	level2			127.098	173.3	POS	C5H10N4					Organic nitrogen compounds	有机含氮化合物	Organonitrogen compounds	有机氮化合物	Amines	胺	0.200823	0.190497	1.93692	0.776079	0.1728	0.253059	0.17011	0.198656	0.942265	0.424677	0.962514	0.255974	-1.96593
1097	Aucubin	2.31	level2			345.121	169	NEG	C15H22O9					Lipids and lipid-like molecules	脂质和类脂分子	Prenol lipids	异戊烯醇脂类	Terpene glycosides		0.000918618	0.000358135	0.000670184	0.000648979	0.000863552	6.39171e-06	0.0068921	0.00258735	0.309567	0.465538	0.962514	3.9868	1.99523
1098	13-Oxocryptopine	2.31	level2			384.144	184.5	POS	C21H21NO6	HMDB0032878		15215-66-4		Alkaloids and derivatives	生物碱和衍生物	Protopine alkaloids		Protopine alkaloids		0.0858359	0.168433	0.0579899	0.104086	0.0459786	0.0180984	0.112841	0.0589726	1.10177	0.358009	0.962514	0.566574	-0.819665
1099	5-Methoxypsoralen	2.31	level2			215.032	169.9	NEG	C12H8O4	HMDB0030637		484-20-8	C01557	Phenylpropanoids and polyketides	苯丙素类和聚酮类	Coumarins and derivatives	香豆素类及其衍生物	Furanocoumarins		1.58984	1.92781	1.80006	1.77257	1.61835	1.34694	1.82645	1.59725	0.962286	0.361266	0.962514	0.901092	-0.150253
1100	PC(18:2(9Z,12Z)/20:0)	2.31	level2			814.629	65.9	POS	C46H88NO8P	HMDB0008143				Lipids and lipid-like molecules	脂质和类脂分子	Glycerophospholipids	甘油磷脂类	Glycerophosphocholines	甘油磷酸胆碱	2.92647	1.9007	1.50557	2.11091	1.71806	0.494421	2.34116e-05	0.737503	1.26732	0.107181	0.962514	0.349376	-1.51715
1101	PC(22:5(4Z,7Z,10Z,13Z,16Z)/P-18:0)	2.31	level2			820.624	18.7	POS	C48H86NO7P	HMDB0008686			C00157	Lipids and lipid-like molecules	脂质和类脂分子	Glycerophospholipids	甘油磷脂类	Glycerophosphocholines	甘油磷酸胆碱	0.293883	0.220058	0.195207	0.236383	0.218307	2.49534e-05	0.0959019	0.104745	1.16296	0.132257	0.962514	0.443115	-1.17425
1102	Ser-Glu	2.3	level2			233.077	235.9	NEG	C8H14N2O6					Organic acids and derivatives	有机酸及其衍生物	Carboxylic acids and derivatives	羧酸及衍生物	Amino acids, peptides, and analogues	氨基酸、肽和类似物	0.0553323	0.0311347	0.0535001	0.0466557	0.0662487	0.0463954	6.43614e-06	0.0375502	1.04818	0.688487	0.975912	0.804836	-0.313233
1103	Succinamide	2.3	level2			117.066	213.5	POS	C4H8N2O2	HMDB0258539				Lipids and lipid-like molecules	脂质和类脂分子	Fatty Acyls	脂肪酰类	Fatty amides	脂肪酸酰胺	2.38509e-05	0.124177	0.130135	0.0847786	0.122538	0.123252	0.10929	0.11836	1.06167	0.511989	0.962514	1.39611	0.481412
1104	4-Chloro-N'-(2-chloroacetyl)benzohydrazide	2.3	level2			247.004	200	POS	C9H8Cl2N2O2					Benzenoids	苯环型化合物	Benzene and substituted derivatives	苯和取代衍生物	Benzoic acids and derivatives	苯甲酸及衍生物	0.697152	0.469265	2.35453e-05	0.388814	0.516031	0.730206	0.573897	0.606711	0.96456	0.368079	0.962514	1.56042	0.641931
1105	tert-Butyl 4-(2-aminoethyl)-1-piperazinecarboxylate	2.3	level2			230.186	190.1	POS	C11H23N3O2					Organoheterocyclic compounds	有机杂环化合物	Diazinanes		Piperazines		0.0363662	0.0269849	0.00563307	0.0229947	0.0247467	0.085617	0.0338114	0.0480584	1.16539	0.299186	0.962514	2.08997	1.06348
1106	Axitinib	2.3	level2			387.127	172.2	POS	C22H18N4OS					Organosulfur compounds	有机硫化合物	Thioethers		Aryl thioethers		0.162985	0.00821526	0.00819956	0.0597999	0.00735023	2.49534e-05	0.427967	0.145114	0.593811	0.601233	0.964685	2.42666	1.27897
1107	N-(2-Aminobenzoyl)alanine	2.3	level2			207.077	158.4	NEG	C10H12N2O3					Benzenoids	苯环型化合物	Benzene and substituted derivatives	苯和取代衍生物	Benzoic acids and derivatives	苯甲酸及衍生物	0.0163803	6.18187e-06	0.0204898	0.0122921	0.0210367	0.0221882	0.014598	0.0192743	0.960595	0.35539	0.962514	1.56802	0.648942
1108	4-Methylpiperidine-1-carboximidamide	2.3	level2			142.134	135.7	POS	C7H15N3					Organoheterocyclic compounds	有机杂环化合物	Piperidines	哌啶	Piperidines	哌啶	0.362746	0.173744	0.250906	0.262465	0.147206	0.408016	0.334213	0.296478	0.299734	0.73855	0.984009	1.12959	0.175798
1109	[2-[docosa-4.7.10.13.16.19-hexaenoyloxy]-3-(octadecanoyloxy)propoxy]({[2.3.4.5.6-pentahydroxycyclohexyl]oxy})phosphinic acid	2.3	level2			909.546	116.3	NEG	C49H83O13P	HMDB0009821				Lipids and lipid-like molecules	脂质和类脂分子	Glycerophospholipids	甘油磷脂类	Glycerophosphoinositols	甘油磷酸肌醇	0.120421	0.182054	0.134534	0.14567	0.140026	0.0706619	0.0566003	0.0890959	1.59688	0.150043	0.962514	0.61163	-0.709268
1110	Beclomethasone	2.3	level2			409.183	31	POS	C22H29ClO5					Lipids and lipid-like molecules	脂质和类脂分子	Steroids and steroid derivatives	甾类和甾类衍生物	Hydroxysteroids	羟类固醇	0.996799	0.811228	0.967977	0.925335	0.90765	0.863639	2.34116e-05	0.590437	1.10801	0.328304	0.962514	0.63808	-0.648191
1111	4-Guanidinobutyric acid	2.3	level2			145.161	17.1	POS	C5H11N3O2			463-00-3		Organic acids and derivatives	有机酸及其衍生物	Carboxylic acids and derivatives	羧酸及衍生物	Amino acids, peptides, and analogues	氨基酸、肽和类似物	0.12768	0.101414	0.131671	0.120255	0.16921	0.161302	0.187674	0.172729	1.98589	0.0129661	0.962514	1.43635	0.522412
1112	taxifolin	2.3	level2			305.065	256.2	POS	C15H12O7	HMDB0242509				Phenylpropanoids and polyketides	苯丙素类和聚酮类	Flavonoids	黄酮类	Flavans		0.279122	0.376539	0.276796	0.310819	0.26697	0.33154	0.255402	0.284637	0.64806	0.553322	0.962514	0.915764	-0.126952
1113	Argatroban	2.3	level2			509.254	108.8	POS	C23H36N6O5S	HMDB0014423		74863-84-6	C04931	Organic acids and derivatives	有机酸及其衍生物	Carboxylic acids and derivatives	羧酸及衍生物	Amino acids, peptides, and analogues	氨基酸、肽和类似物	0.911853	0.722085	1.09684	0.910258	1.0372	1.03269	1.04938	1.03976	1.15694	0.353896	0.962514	1.14227	0.1919
1114	PC(15:0/22:5(7Z,10Z,13Z,16Z,19Z))	2.3	level2			794.567	35.2	POS	C45H80NO8P	HMDB0007957				Lipids and lipid-like molecules	脂质和类脂分子	Glycerophospholipids	甘油磷脂类	Glycerophosphocholines	甘油磷酸胆碱	0.367686	0.599711	0.336338	0.434578	0.335335	0.579815	2.34116e-05	0.305058	1.07783	0.527619	0.962514	0.701963	-0.510534
1115	Neohancoside D	2.29	level2			547.167	171.3	NEG	C23H32O15					Phenylpropanoids and polyketides	苯丙素类和聚酮类	Cinnamic acids and derivatives	肉桂酸及其衍生物	Hydroxycinnamic acids and derivatives	羟基肉桂酸及其衍生物	0.0409665	0.0579042	0.0455707	0.0481472	0.0484489	0.030063	0.0517414	0.0434178	0.624094	0.604706	0.964888	0.901773	-0.149165
1116	Glycinoeclepin_B	2.29	level2			559.298	117	POS	C31H42O9	HMDB0037035		103847-17-2		Lipids and lipid-like molecules	脂质和类脂分子	Prenol lipids	异戊烯醇脂类	Sesquiterpenoids		1.4721	0.479506	0.643011	0.864874	0.700234	0.66504	1.39404	0.91977	0.305067	0.894395	0.999955	1.06347	0.0887844
1117	LysoPE(22:0/0:0)	2.29	level2			538.386	113.1	POS	C27H56NO7P	HMDB0011520				Lipids and lipid-like molecules	脂质和类脂分子	Glycerophospholipids	甘油磷脂类	Glycerophosphoethanolamines	磷脂酰乙醇胺	11.0193	10.1557	12.7446	11.3065	13.9928	10.8016	6.91853	10.571	0.647181	0.753031	0.985669	0.934945	-0.0970472
1118	LysoPE(24:0/0:0)	2.29	level2			566.417	110.2	POS	C29H60NO7P	HMDB0011527				Lipids and lipid-like molecules	脂质和类脂分子	Glycerophospholipids	甘油磷脂类	Glycerophosphoethanolamines	磷脂酰乙醇胺	0.374607	0.610465	0.465679	0.483584	0.533171	0.203808	0.221969	0.319649	1.39532	0.266473	0.962514	0.661001	-0.597276
1119	2-{[(2-Methylphenoxy)acetyl]amino}benzoic acid	2.29	level2			286.103	68	POS	C16H15NO4					Benzenoids	苯环型化合物	Benzene and substituted derivatives	苯和取代衍生物	Benzoic acids and derivatives	苯甲酸及衍生物	0.186154	0.202288	2.35453e-05	0.129488	2.38091e-05	0.230561	0.171648	0.134077	0.0757895	0.963725	0.999955	1.03544	0.050245
1120	2,2-Dimethylglutaric acid	2.29	level2			159.066	44.6	NEG	C7H12O4	HMDB0061676				Lipids and lipid-like molecules	脂质和类脂分子	Fatty Acyls	脂肪酰类	Fatty acids and conjugates	脂肪酸和聚合物	3.08445	3.66549	4.27932	3.67642	4.09247	0.814949	3.45709	2.78817	0.960366	0.449655	0.962514	0.758393	-0.398983
1121	PA(18:3(9Z,12Z,15Z)/16:1(9Z))	2.29	level2			669.459	25.5	POS	C37H65O8P	HMDB0115004				Lipids and lipid-like molecules	脂质和类脂分子	Glycerophospholipids	甘油磷脂类	Glycerophosphates		0.445131	0.474908	2.35453e-05	0.306688	0.525184	0.604662	0.422465	0.517437	0.978548	0.264101	0.962514	1.68718	0.754614
1122	4-Palmitoylmorpholine	2.29	level2			326.305	16.9	POS	C20H39NO2					Organoheterocyclic compounds	有机杂环化合物	Oxazinanes	恶嗪烷	Morpholines	吗啉	1.01396	1.1457	1.20176	1.12047	1.34631	1.54957	1.07129	1.32239	1.2121	0.247764	0.962514	1.18021	0.239038
1123	Nitrotyrosine	2.28	level2			225.048	227.1	NEG	C9H10N2O5	HMDB0001904		3604-79-3		Organic acids and derivatives	有机酸及其衍生物	Carboxylic acids and derivatives	羧酸及衍生物	Amino acids, peptides, and analogues	氨基酸、肽和类似物	0.0217156	0.0273516	0.0223006	0.0237893	0.0225413	0.0220147	0.0216347	0.0220635	0.926831	0.437047	0.962514	0.927457	-0.108648
1124	N-Palmitoyltaurine	2.28	level2			362.236	39.5	NEG	C18H37NO4S	HMDB0240594		83982-06-3		Lipids and lipid-like molecules	脂质和类脂分子	Fatty Acyls	脂肪酰类	Fatty amides	脂肪酸酰胺	0.850731	0.815658	0.503764	0.723384	0.42068	0.117101	0.658027	0.398603	1.32405	0.165102	0.962514	0.551025	-0.859811
1125	2,3-Quinoxalinedione, 6-chloro-1,4-dihydro-	2.28	level2			194.996	28.7	NEG	C8H5ClN2O2					Organoheterocyclic compounds	有机杂环化合物	Diazanaphthalenes	二氮杂萘	Benzodiazines	苯并二嗪	0.983138	0.761962	0.0463545	0.597151	0.370138	0.0210251	0.757373	0.382845	0.479905	0.577343	0.962912	0.641119	-0.641335
1126	LysoPC(22:5(7Z,10Z,13Z,16Z,19Z))	2.28	level2			570.355	112.4	POS	C30H52NO7P	HMDB0010403			C04230	Lipids and lipid-like molecules	脂质和类脂分子	Glycerophospholipids	甘油磷脂类	Glycerophosphocholines	甘油磷酸胆碱	1.15241	2.00885	1.62939	1.59689	1.82265	2.49534e-05	1.93653	1.25307	0.983505	0.637088	0.969377	0.784694	-0.349797
1127	SM_C16:1	2.28	level2			716.58	103.1	POS	C40H80N2O6P	HMDB0029216				Organic nitrogen compounds	有机含氮化合物	Organonitrogen compounds	有机氮化合物	Quaternary ammonium salts	季铵盐	0.419024	0.25986	0.293841	0.324242	0.328048	0.455035	0.182352	0.321811	0.300781	0.980288	0.999955	0.992504	-0.0108547
1128	PC(20:1(11Z)/15:0)	2.28	level2			774.597	36.2	POS	C43H84NO8P	HMDB0008297				Lipids and lipid-like molecules	脂质和类脂分子	Glycerophospholipids	甘油磷脂类	Glycerophosphocholines	甘油磷酸胆碱	4.56618	4.63551	4.82655	4.67608	5.42985	4.41788	4.7806	4.87611	0.56511	0.549074	0.962514	1.04278	0.0604314
1129	Lormetazepam	2.27	level2			335.037	256.4	POS	C16H12Cl2N2O2	HMDB0041919		848-75-9		Organoheterocyclic compounds	有机杂环化合物	Benzodiazepines		1,4-benzodiazepines		2.11428	2.79482	2.12175	2.34361	1.92686	3.26277	2.01253	2.40072	0.0820004	0.912327	0.999955	1.02437	0.0347327
1130	5-Heptenoic acid, 7-[(1S,2R,3R,4R)-3-[(1E,3R)-3-hydroxy-4-(4-iodophenoxy)-1-buten-1-yl]-7-oxabicyclo[2.2.1]hept-2-yl]-, (5Z)-	2.27	level2			511.099	235.5	NEG	C23H29IO5					Lipids and lipid-like molecules	脂质和类脂分子	Fatty Acyls	脂肪酰类	Fatty acids and conjugates	脂肪酸和聚合物	0.00930455	0.00637516	0.00990415	0.00852795	0.0109876	0.00709076	6.43614e-06	0.00602827	1.08516	0.502294	0.962514	0.706884	-0.500455
1131	Methyl 2-[(2-hydroxy-3-methylbutanoyl)amino]-3-methylbutanoate	2.27	level2			232.154	156.8	POS	C11H21NO4					Organic acids and derivatives	有机酸及其衍生物	Carboxylic acids and derivatives	羧酸及衍生物	Amino acids, peptides, and analogues	氨基酸、肽和类似物	0.380298	0.704064	0.458819	0.514394	0.463884	0.881612	0.632833	0.659443	1.07256	0.404136	0.962514	1.28198	0.358375
1132	(2R)-3-(tert-Butylamino)propane-1,2-diol	2.27	level2			148.133	155	POS	C7H17NO2					Organic nitrogen compounds	有机含氮化合物	Organonitrogen compounds	有机氮化合物	Amines	胺	0.0735528	0.121447	0.06327	0.0860899	0.0594741	0.0249246	0.0906852	0.0583613	1.06478	0.348195	0.962514	0.677911	-0.560832
1133	Sordariol	2.27	level2			223.1	14.5	NEG	C12H16O4					Phenylpropanoids and polyketides	苯丙素类和聚酮类	Cinnamyl alcohols		Cinnamyl alcohols		0.187115	0.251525	0.327916	0.255519	0.359395	0.107596	0.17889	0.215294	0.796618	0.661696	0.972304	0.842575	-0.247123
1134	2-[(2-Fluorophenyl)amino]acetohydrazide	2.26	level2			182.074	169.4	NEG	C8H10FN3O					Organic acids and derivatives	有机酸及其衍生物	Carboxylic acids and derivatives	羧酸及衍生物	Amino acids, peptides, and analogues	氨基酸、肽和类似物	0.0360862	0.00149947	0.00668562	0.0147571	0.00634517	0.121513	0.0588391	0.0622326	1.21542	0.246333	0.962514	4.21713	2.07626
1135	tert-Butyl 4-amino-3-(trifluoromethyl)phenylcarbamate	2.26	level2			277.116	169.1	POS	C12H15F3N2O2					Benzenoids	苯环型化合物	Benzene and substituted derivatives	苯和取代衍生物	Phenylcarbamic acid esters		0.0486022	2.21526e-05	0.129274	0.0592994	0.162826	0.0313518	0.0818185	0.0919989	0.914256	0.575677	0.962912	1.55143	0.6336
1136	Urea, N-phenyl-N'-(4-phenyl-2-thiazolyl)-	2.26	level2			296.085	166.9	POS	C16H13N3OS					Benzenoids	苯环型化合物	Benzene and substituted derivatives	苯和取代衍生物	N-phenylureas		0.0915235	0.0323101	0.0705289	0.0647875	0.0797882	0.138256	2.34116e-05	0.0726891	0.924448	0.865154	0.999955	1.12196	0.166024
1137	Nonanamide, N-[(4-hydroxy-2-iodo-5-methoxyphenyl)methyl]-8-methyl-	2.26	level2			432.104	138.6	NEG	C18H28INO3					Benzenoids	苯环型化合物	Phenols	酚类	Methoxyphenols		0.00267668	0.00146442	0.0251367	0.00975926	0.0267414	0.00748777	0.0165343	0.0169211	1.17195	0.492683	0.962514	1.73385	0.793983
1138	6-Ethyl-7-hydroxy-3-phenyl-2-(trifluoromethyl)-4H-chromen-4-one	2.26	level2			333.072	123.7	NEG	C18H13F3O3					Phenylpropanoids and polyketides	苯丙素类和聚酮类	Isoflavonoids		Isoflav-2-enes		0.0128114	0.00240335	6.34955e-06	0.0050737	6.30815e-06	0.0349104	0.0299825	0.0216331	0.425328	0.226375	0.962514	4.26377	2.09213
1139	LysoPE(0:0/18:0)	2.26	level2			482.324	120	POS	C23H48NO7P	HMDB0011129		899443-67-5		Lipids and lipid-like molecules	脂质和类脂分子	Glycerophospholipids	甘油磷脂类	Glycerophosphoethanolamines	磷脂酰乙醇胺	6.53504	2.21526e-05	4.42742	3.65416	4.62331	5.67969	5.50121	5.26807	0.948707	0.455073	0.962514	1.44166	0.527735
1140	35S-Methylokadaic_acid_7-hexadecanoate	2.26	level2			1057.71	114.3	POS	C61H100O14	HMDB0030443				Lipids and lipid-like molecules	脂质和类脂分子	Fatty Acyls	脂肪酰类	Fatty acid esters	脂肪酸酯	1.02764	0.923667	0.949584	0.966964	0.974004	0.946083	0.779011	0.899699	1.1212	0.381281	0.962514	0.930437	-0.104019
1141	(2-aminoethoxy)[2-[octadec-9-enoyloxy]-3-[octadeca-1.11-dien-1-yloxy]propoxy]phosphinic acid	2.26	level2			726.542	37	NEG	C41H78NO7P	HMDB0011408				Lipids and lipid-like molecules	脂质和类脂分子	Glycerophospholipids	甘油磷脂类	Glycerophosphoethanolamines	磷脂酰乙醇胺	0.502669	0.629318	0.194934	0.442307	0.199596	0.0916481	0.146833	0.146026	1.77814	0.0893221	0.962514	0.330145	-1.59883
1142	2-Chloro-N-(2-hydroxyphenyl)nicotinamide	2.26	level2			247.027	27.2	NEG	C12H9ClN2O2					Benzenoids	苯环型化合物	Benzene and substituted derivatives	苯和取代衍生物	Anilides		6.87516e-06	1.88257	1.98646	1.28968	1.89023	1.85128	6.43614e-06	1.24717	0.0203321	0.964499	0.999955	0.96704	-0.0483521
1143	Polyporusterone A	2.26	level2			479.337	24.7	POS	C28H46O6					Lipids and lipid-like molecules	脂质和类脂分子	Steroids and steroid derivatives	甾类和甾类衍生物	Bile acids, alcohols and derivatives	胆汁酸类、醇类及其衍生物	0.43926	0.317318	0.155709	0.304096	0.270805	0.330558	0.212336	0.271233	0.234136	0.730459	0.983045	0.891932	-0.164994
1144	N2-Fructopyranosylarginine	2.26	level2			337.172	261.5	POS	C12H24N4O7	HMDB0041541		162966-07-6		Organic acids and derivatives	有机酸及其衍生物	Carboxylic acids and derivatives	羧酸及衍生物	Amino acids, peptides, and analogues	氨基酸、肽和类似物	0.0279296	2.21526e-05	0.0216337	0.0165285	0.0216565	0.0221362	0.00754542	0.0171127	0.756128	0.954919	0.999955	1.03535	0.0501116
1145	Daidzein	2.26	level2			251.036	173.7	POS	C15H10O4	HMDB0003312		486-66-8	C10208	Phenylpropanoids and polyketides	苯丙素类和聚酮类	Isoflavonoids		Isoflav-2-enes		0.148952	0.0480726	0.100903	0.0993094	0.112761	0.0592063	0.0215856	0.0645177	1.0778	0.426562	0.962514	0.649663	-0.622237
1146	PC(24:0/14:0)	2.26	level2			818.658	33.2	POS	C46H92NO8P	HMDB0008755				Lipids and lipid-like molecules	脂质和类脂分子	Glycerophospholipids	甘油磷脂类	Glycerophosphocholines	甘油磷酸胆碱	0.43863	0.302788	0.385851	0.375757	0.57417	0.0728024	0.156797	0.267923	1.20454	0.537262	0.962514	0.713023	-0.48798
1147	Piperazine-2-carbonitrile	2.25	level2			112.087	289	POS	C5H9N3					Organoheterocyclic compounds	有机杂环化合物	Diazinanes		Piperazines		0.219779	0.372327	0.280191	0.290766	0.251026	0.427684	0.256968	0.311893	0.378534	0.786512	0.991742	1.07266	0.101193
1148	7-Hydroxy-3-(4-methoxyphenoxy)-2-(trifluoromethyl)-4H-chromen-4-one	2.25	level2			351.048	256.8	NEG	C17H11F3O5					Organoheterocyclic compounds	有机杂环化合物	Benzopyrans	苯并吡喃	1-benzopyrans	1-苯并吡喃	0.0493255	0.0443015	0.0464404	0.0466892	0.0442231	0.0464245	0.0492014	0.0466163	0.00387758	0.973336	0.999955	0.99844	-0.00225197
1149	3',4',5,7-Tetrahydroxy-3,6,8-trimethoxyflavone	2.25	level2			375.068	168.9	NEG	C18H16O9					Phenylpropanoids and polyketides	苯丙素类和聚酮类	Flavonoids	黄酮类	O-methylated flavonoids		0.0278171	0.00959711	0.0265059	0.0213067	0.0113042	0.0301235	0.019692	0.0203732	0.0121527	0.912769	0.999955	0.956189	-0.064633
1150	Methyl 5-(furan-2-yl)-7-(trifluoromethyl)pyrazolo[1,5-a]pyrimidine-3-carboxylate	2.25	level2			312.059	166.4	POS	C13H8F3N3O3					Organoheterocyclic compounds	有机杂环化合物	Pyrazolopyrimidines	吡唑并嘧啶	Pyrazolo[1,5-a]pyrimidines		0.0488193	0.025671	0.0424042	0.0389648	0.0473726	0.0261883	2.34116e-05	0.0245281	1.12477	0.399761	0.962514	0.629494	-0.667737
1151	LysoPE(20:4(8Z,11Z,14Z,17Z)/0:0)	2.25	level2			502.292	119	POS	C25H44NO7P	HMDB0011518				Lipids and lipid-like molecules	脂质和类脂分子	Glycerophospholipids	甘油磷脂类	Glycerophosphoethanolamines	磷脂酰乙醇胺	2.38509e-05	0.998104	1.06121	0.686445	0.898096	1.31259	1.16602	1.12557	1.10312	0.294697	0.962514	1.63971	0.713439
1152	2-amino-3-({hydroxy[2-(icosanoyloxy)-3-[octadec-11-enoyloxy]propoxy]phosphoryl}oxy)propanoic acid	2.25	level2			816.574	63.7	NEG	C44H84NO10P	HMDB0112392				Lipids and lipid-like molecules	脂质和类脂分子	Glycerophospholipids	甘油磷脂类	Glycerophosphoserines	甘油磷酸丝氨酸	1.60049	1.50265	0.897169	1.33343	0.956947	0.626575	0.824249	0.80259	1.71952	0.0914226	0.962514	0.601897	-0.732411
1153	2-amino-3-({hydroxy[2-(icosanoyloxy)-3-(octadecanoyloxy)propoxy]phosphoryl}oxy)propanoic acid	2.25	level2			814.557	36.7	NEG	C44H86NO10P	HMDB0010164			C02737	Lipids and lipid-like molecules	脂质和类脂分子	Glycerophospholipids	甘油磷脂类	Glycerophosphoserines	甘油磷酸丝氨酸	0.237284	0.341785	0.256654	0.278574	0.219213	0.249407	0.373606	0.280742	0.111046	0.971545	0.999955	1.00778	0.0111821
1154	3-[3-(4-Chlorophenyl)-1,2,4-oxadiazol-5-yl]piperidine	2.25	level2			264.09	14.7	POS	C13H14ClN3O					Organoheterocyclic compounds	有机杂环化合物	Azoles	吡咯类	Oxadiazoles	恶二唑	0.734282	0.460412	0.849788	0.681494	0.963306	0.735498	0.98067	0.893158	1.26219	0.204824	0.962514	1.31059	0.390214
1155	N-(2,4-Dinitrophenyl)-L-leucine	2.25	level2			296.088	1.6	NEG	C12H15N3O6					Organic acids and derivatives	有机酸及其衍生物	Carboxylic acids and derivatives	羧酸及衍生物	Amino acids, peptides, and analogues	氨基酸、肽和类似物	6.87516e-06	0.000113757	6.34955e-06	4.23271e-05	8.89924e-05	0.000142342	6.43614e-06	7.92569e-05	0.692476	0.526351	0.962514	1.87249	0.904956
1156	7-Hydroxyenterolactone	2.25	level2			315.127	218.5	POS	C18H18O5					Lignans, neolignans and related compounds	木脂素、新木脂素及相关化合物	Furanoid lignans		Tetrahydrofuran lignans		0.138699	0.130435	0.169347	0.14616	0.186233	0.255832	0.179877	0.207314	1.76294	0.086645	0.962514	1.4184	0.504268
1157	N-Nitrosopiperazine (NPAZ)	2.25	level2			116.082	212.9	POS	C4H9N3O	HMDB0243969				Organoheterocyclic compounds	有机杂环化合物	Diazinanes		Piperazines		0.44566	0.313142	0.983559	0.580787	0.870889	0.439518	0.873782	0.728063	0.759608	0.588412	0.963001	1.25358	0.326054
1158	honokiol	2.25	level2			267.144	144.9	POS	C18H18O2	HMDB0253212			C10630	Benzenoids	苯环型化合物	Benzene and substituted derivatives	苯和取代衍生物	Biphenyls and derivatives		0.159562	0.137038	0.170405	0.155669	0.168805	0.195438	0.206967	0.190403	1.73536	0.0811892	0.962514	1.22313	0.290579
1159	PE(P-18:1(9Z)/20:5(5Z,8Z,11Z,14Z,17Z))	2.25	level2			748.528	19.3	POS	C43H74NO7P	HMDB0011453				Lipids and lipid-like molecules	脂质和类脂分子	Glycerophospholipids	甘油磷脂类	Glycerophosphoethanolamines	磷脂酰乙醇胺	2.38509e-05	0.356239	0.292882	0.216382	0.294721	0.27915	0.195534	0.256468	1.01558	0.742756	0.98473	1.18526	0.245201
1160	5-[[17-(5,6-dihydroxy-6-methylheptan-2-yl)-3,12-dihydroxy-4,4,10,13,14-pentamethyl-2,3,5,6,7,11,12,15,16,17-decahydro-1H-cyclopenta[a]phenanthren-2-yl]oxy]-3-hydroxy-3-methyl-5-oxopentanoic acid	2.25	level2			654.455	18.1	POS	C36H60O9	HMDB0036438		126882-55-1		Lipids and lipid-like molecules	脂质和类脂分子	Prenol lipids	异戊烯醇脂类	Triterpenoids		2.38509e-05	0.157961	0.168571	0.108852	0.188672	0.186442	0.198962	0.191359	1.12509	0.268915	0.962514	1.75797	0.813912
1161	Griseofulvin	2.25	level2			351.064	16.5	NEG	C17H17ClO6	HMDB0014544		126-07-8	C06686	Organoheterocyclic compounds	有机杂环化合物	Benzofurans	苯并呋喃	Benzofurans		0.358938	0.503018	0.521824	0.46126	0.526692	0.33962	0.419099	0.428471	0.490373	0.683501	0.97539	0.928913	-0.106385
1162	ERGONOVINE MALEATE	2.25	level2			364.143	5.8	POS	C19H23N3O2	HMDB0015383		60-79-7	C07543	Alkaloids and derivatives	生物碱和衍生物	Ergoline and derivatives		Lysergic acids and derivatives		0.0826582	0.0751385	0.0740776	0.0772914	0.0748727	0.0807971	0.073771	0.0764803	0.318661	0.826736	0.997949	0.989505	-0.0152211
1163	1,4-Dihydroxy-2-(4-morpholinyl)anthra-9,10-quinone	2.24	level2			324.092	239.4	NEG	C18H15NO5					Benzenoids	苯环型化合物	Anthracenes	蒽类	Anthraquinones	蒽醌	0.00144077	0.00192724	0.00210624	0.00182475	0.00185701	6.39171e-06	0.00130251	0.0010553	1.09005	0.257554	0.962514	0.578327	-0.790041
1164	3-[(Dimethylcarbamothioyl)sulfanyl]propane-1-sulfonic acid	2.24	level2			241.999	236.2	NEG	C6H13NO3S3					Organic acids and derivatives	有机酸及其衍生物	Organic sulfonic acids and derivatives	有机磺酸及衍生物	Organosulfonic acids and derivatives	有机磺酸及衍生物	0.0095432	0.00585707	0.00925479	0.00821835	0.0110998	0.00785909	6.43614e-06	0.00632179	1.053	0.616636	0.965453	0.769228	-0.378516
1165	(5-Nitro-1,3-dioxo-1,3-dihydro-2H-isoindol-2-yl)acetic acid	2.24	level2			249.016	216.1	NEG	C10H6N2O6					Organoheterocyclic compounds	有机杂环化合物	Indoles and derivatives	吲哚和衍生物	Indolyl carboxylic acids and derivatives	吲哚基羧酸及衍生物	0.0155432	0.0158132	0.00433446	0.0118969	0.00439501	0.00337928	0.0111292	0.00630116	1.06208	0.28125	0.962514	0.529645	-0.916901
1166	2-Piperazinecarboxamide	2.24	level2			130.097	204.7	POS	C5H11N3O					Organic acids and derivatives	有机酸及其衍生物	Carboxylic acids and derivatives	羧酸及衍生物	Amino acids, peptides, and analogues	氨基酸、肽和类似物	0.207244	0.481447	0.492804	0.393831	0.374399	0.431558	0.418149	0.408035	0.516394	0.888306	0.999955	1.03607	0.0511155
1167	(E)-1-Hydroxy-2-methylbut-2-enyl 4-diphosphate	2.24	level2			259.012	189.8	NEG	C6H14O7P2					Organic acids and derivatives	有机酸及其衍生物	Organic phosphoric acids and derivatives	有机磷酸及衍生物	Organic phosphoric acids and derivatives		0.0043065	0.00291257	0.00370124	0.0036401	0.00240529	0.00296946	0.00417996	0.00318491	0.710308	0.528901	0.962514	0.874949	-0.192729
1168	N-3-Hydroxyoctanoyl-L-homoserine lactone	2.24	level2			244.154	154.1	POS	C12H21NO4					Organic acids and derivatives	有机酸及其衍生物	Carboxylic acids and derivatives	羧酸及衍生物	Amino acids, peptides, and analogues	氨基酸、肽和类似物	0.0496585	0.0696873	0.0673438	0.0622299	0.0695937	0.0638195	0.0427419	0.0587184	0.45358	0.750839	0.98528	0.943572	-0.0837954
1169	1H-Indole-4-carboxamide, N-[(1,2-dihydro-4,6-dimethyl-2-oxo-3-pyridinyl)methyl]-3-methyl-1-[(1S)-1-methylpropyl]-6-[6-(1-piperazinyl)-3-pyridinyl]-	2.24	level2			527.313	118	POS	C31H38N6O2					Organoheterocyclic compounds	有机杂环化合物	Diazinanes		Piperazines		0.401466	0.286949	0.238638	0.309018	0.152693	0.219248	0.320477	0.230806	1.08276	0.318078	0.962514	0.746902	-0.421008
1170	5-(4-chlorophenyl)-4-pyrimidinyl-4-amine	2.24	level2			206.048	13.2	POS	C10H8ClN3					Organoheterocyclic compounds	有机杂环化合物	Diazines	二氮杂苯	Pyrimidines and pyrimidine derivatives	嘧啶类和嘧啶类衍生物	0.00237017	0.00806609	0.00224569	0.00422732	0.00104226	2.49534e-05	0.0315503	0.0108725	0.620157	0.561891	0.962514	2.57196	1.36287
1171	N,N-Di(prop-2-en-1-yl)pyridine-3-carboxamide	2.24	level2			203.118	12.8	POS	C12H14N2O					Organoheterocyclic compounds	有机杂环化合物	Pyridines and derivatives	吡啶及衍生物	Pyridinecarboxylic acids and derivatives	吡啶羧酸及衍生物	0.0097516	0.00311458	0.00359435	0.00548684	0.00329401	0.00923002	0.0104416	0.00765519	0.770345	0.519358	0.962514	1.39519	0.480462
1172	Capsianoside_VI	2.24	level2			923.498	270.1	POS	C44H74O20	HMDB0039165				Lipids and lipid-like molecules	脂质和类脂分子	Prenol lipids	异戊烯醇脂类	Terpene glycosides		0.00402647	0.239447	0.00941716	0.0842968	0.00207088	0.159238	0.00350711	0.0549388	0.327203	0.769195	0.988726	0.65173	-0.617653
1173	(4S,5Z,6S)-4-(2-methoxy-2-oxoethyl)-5-[2-[(E)-3-phenylprop-2-enoyl]oxyethylidene]-6-[(2S,3R,4S,5S,6R)-3,4,5-trihydroxy-6-(hydroxymethyl)oxan-2-yl]oxy-4H-pyran-3-carboxylic acid	2.24	level2			215.032	141.5	NEG	C12H8O4	HMDB0014693		298-81-7	C01864	Phenylpropanoids and polyketides	苯丙素类和聚酮类	Coumarins and derivatives	香豆素类及其衍生物	Furanocoumarins		0.0788695	0.029562	0.0201833	0.0428716	0.021432	0.0907774	0.0323751	0.0481949	0.174258	0.859408	0.999767	1.12417	0.168857
1174	Putative Phenylalanine conjugated chenodeoxycholic acid	2.24	level2			540.366	129.4	POS	C33H49NO5	HMDB0242391				Lipids and lipid-like molecules	脂质和类脂分子	Steroids and steroid derivatives	甾类和甾类衍生物	Bile acids, alcohols and derivatives	胆汁酸类、醇类及其衍生物	0.398703	2.21526e-05	0.198204	0.198976	0.220049	0.20015	0.261721	0.227307	0.891878	0.829594	0.998032	1.14238	0.192043
1175	PC(20:5(5Z,8Z,11Z,14Z,17Z)/15:0)	2.24	level2			766.533	21.1	POS	C43H76NO8P	HMDB0008494				Lipids and lipid-like molecules	脂质和类脂分子	Glycerophospholipids	甘油磷脂类	Glycerophosphocholines	甘油磷酸胆碱	0.127047	0.0636294	0.0524715	0.0810492	0.0661556	0.123482	0.0545993	0.0814122	0.0176789	0.99136	0.999955	1.00448	0.00644695
1176	[(5-Chloro-1,3-benzothiazol-2-yl)sulfanyl]acetic acid	2.23	level2			257.946	289.4	NEG	C9H6ClNO2S2					Organoheterocyclic compounds	有机杂环化合物	Benzothiazoles		Benzothiazoles		0.144555	0.0613062	0.0812027	0.0956881	0.206179	0.0694959	0.0875897	0.121088	0.325344	0.636038	0.9691	1.26545	0.33965
1177	4-Methylumbelliferyl phosphate	2.23	level2			255.007	249.4	NEG	C10H9O6P	HMDB0246521				Phenylpropanoids and polyketides	苯丙素类和聚酮类	Coumarins and derivatives	香豆素类及其衍生物	Coumarins and derivatives	香豆素类及其衍生物	0.00769543	0.0105631	0.00645878	0.00823911	0.00646222	0.00744981	0.00684925	0.00692042	0.988535	0.350644	0.962514	0.839948	-0.251629
1178	2-[Bis(5-methyl-2-furyl)methyl]-6-bromo-4-nitrophenol	2.23	level2			389.999	198.8	NEG	C17H14BrNO5					Benzenoids	苯环型化合物	Phenols	酚类	Nitrophenols		0.0554087	0.0517467	0.0512418	0.0527991	6.30815e-06	0.0532016	0.0532874	0.0354984	0.862868	0.432531	0.962514	0.672331	-0.572757
1179	Rhein	2.23	level2			283.028	170.6	NEG	C15H8O6	HMDB0032876		478-43-3	C10401	Benzenoids	苯环型化合物	Anthracenes	蒽类	Anthracenecarboxylic acids and derivatives		0.0182793	0.0194621	0.0183862	0.0187092	0.0193552	0.0199758	0.0198721	0.0197344	1.78665	0.0727783	0.962514	1.0548	0.0769642
1180	2,3-Dinorfluprostenol	2.23	level2			429.152	157.3	NEG	C21H25F3O6					Lipids and lipid-like molecules	脂质和类脂分子	Fatty Acyls	脂肪酰类	Eicosanoids	类花生酸	0.00717975	6.18187e-06	0.00902349	0.00540314	0.0104469	0.00680866	0.00836365	0.00853974	0.964487	0.346941	0.962514	1.58051	0.660394
1181	2-Arachidonylglycerol	2.23	level2			378.559	7.7	POS	C23H38O4			53847-30-6		Lipids and lipid-like molecules	脂质和类脂分子	Glycerophospholipids	甘油磷脂类			0.00982667	0.00963704	0.00958709	0.0096836	0.00718343	0.00826096	0.00860075	0.00801505	1.86432	0.018305	0.962514	0.827693	-0.272833
1182	Zalcitabine	2.23	level2			212.1	222.6	POS	C9H13N3O3	HMDB0015078		7481-89-2	C07207	Nucleosides, nucleotides, and analogues	核苷、核苷酸和类似物	Pyrimidine nucleosides	嘧啶核苷类	Pyrimidine 2',3'-dideoxyribonucleosides		0.355265	0.509638	0.695633	0.520179	0.683454	0.143654	0.477082	0.43473	0.71447	0.668998	0.973579	0.835733	-0.258887
1183	[2-(carbamoyloxymethyl)-2-methylpentyl]_N-propan-2-ylcarbamate	2.23	level2			261.181	160.9	POS	C12H24N2O4	HMDB0014539		78-44-4	C07927	Organic acids and derivatives	有机酸及其衍生物	Carboxylic acids and derivatives	羧酸及衍生物	Amino acids, peptides, and analogues	氨基酸、肽和类似物	0.677794	1.24978	0.681041	0.869539	0.705404	0.593275	0.815136	0.704605	0.75956	0.457193	0.962514	0.81032	-0.303436
1184	Cyclopassifloic_acid_A	2.23	level2			537.38	24	POS	C31H52O7	HMDB0035943		292167-34-1		Lipids and lipid-like molecules	脂质和类脂分子	Steroids and steroid derivatives	甾类和甾类衍生物	Cycloartanols and derivatives		0.255849	0.288004	0.158805	0.234219	0.191744	0.248591	0.148387	0.19624	0.798611	0.477138	0.962514	0.837849	-0.255237
1185	N-(3,4-Dimethoxybenzoyl)-3-(4-fluorophenyl)-.beta.-alanine	2.22	level2			346.106	173.4	NEG	C18H18FNO5					Benzenoids	苯环型化合物	Benzene and substituted derivatives	苯和取代衍生物	Benzoic acids and derivatives	苯甲酸及衍生物	0.0130963	0.00924219	0.00690638	0.0097483	0.00749487	0.00231965	0.00598803	0.00526752	1.52426	0.131701	0.962514	0.540352	-0.888028
1186	Dopamine 4-.beta.-D-glucuronide	2.22	level2			328.106	169.4	NEG	C14H19NO8					Organic oxygen compounds	有机含氧化合物	Organooxygen compounds	有机氧化合物	Carbohydrates and carbohydrate conjugates	碳水化合物和碳水化合物结合物	0.124754	0.373066	0.0896486	0.195823	0.0871224	0.0813954	0.249153	0.139224	0.461988	0.617772	0.965579	0.710967	-0.492146
1187	Tedizolid	2.22	level2			371.125	156.1	POS	C17H15FN6O3	HMDB0245794				Organoheterocyclic compounds	有机杂环化合物	Pyridines and derivatives	吡啶及衍生物	Phenylpyridines		0.0356848	0.00979924	0.222722	0.0894021	0.166865	0.0510775	0.0977952	0.105246	0.817639	0.843093	0.999262	1.17722	0.235383
1188	4-Iodosuberoylanilide hydroxamic acid	2.22	level2			391.053	101.9	POS	C14H19IN2O3					Benzenoids	苯环型化合物	Benzene and substituted derivatives	苯和取代衍生物	Anilides		0.611393	0.64671	0.465133	0.574412	0.446847	0.501921	0.669822	0.53953	0.38502	0.709269	0.980296	0.939274	-0.0903813
1189	PE(16:0/20:3(8Z,11Z,14Z))	2.22	level2			742.536	38.3	POS	C41H76NO8P	HMDB0008936				Lipids and lipid-like molecules	脂质和类脂分子	Glycerophospholipids	甘油磷脂类	Glycerophosphoethanolamines	磷脂酰乙醇胺	0.862167	1.25793	0.355951	0.82535	0.356278	0.419067	0.3747	0.383349	1.45615	0.232025	0.962514	0.464468	-1.10635
1190	PE(22:6(4Z,7Z,10Z,13Z,16Z,19Z)/20:0)	2.22	level2			820.582	33.9	POS	C47H82NO8P	HMDB0009691				Lipids and lipid-like molecules	脂质和类脂分子	Glycerophospholipids	甘油磷脂类	Glycerophosphoethanolamines	磷脂酰乙醇胺	0.282636	0.478884	0.408751	0.39009	0.348654	1.05785	0.714494	0.706999	1.42703	0.210417	0.962514	1.8124	0.8579
1191	PC(20:0/20:4(5Z,8Z,11Z,14Z))	2.22	level2			838.629	33.5	POS	C48H88NO8P	HMDB0008279				Lipids and lipid-like molecules	脂质和类脂分子	Glycerophospholipids	甘油磷脂类	Glycerophosphocholines	甘油磷酸胆碱	2.38509e-05	8.77083	2.35453e-05	2.92363	9.5948	10.9811	2.34116e-05	6.85863	0.711245	0.4335	0.962514	2.34593	1.23016
1192	PE(20:1(11Z)/14:1(9Z))	2.22	level2			716.521	39	POS	C39H74NO8P	HMDB0009251				Lipids and lipid-like molecules	脂质和类脂分子	Glycerophospholipids	甘油磷脂类	Glycerophosphoethanolamines	磷脂酰乙醇胺	0.451589	0.619115	0.191789	0.420831	0.219056	0.25945	0.162102	0.213536	1.40938	0.179256	0.962514	0.507415	-0.978761
1193	3-Iodothyronamine	2.21	level2			356.015	237.5	POS	C14H14INO2	HMDB0060524				Benzenoids	苯环型化合物	Benzene and substituted derivatives	苯和取代衍生物	Diphenylethers		0.144241	0.162309	0.162343	0.156298	0.159233	2.49534e-05	0.162583	0.10728	1.01895	0.457616	0.962514	0.686385	-0.54291
1194	2''-O-Methylmitorubrin	2.21	level2			395.115	218.1	NEG	C22H20O7					Organoheterocyclic compounds	有机杂环化合物	Azaphilones		Azaphilones		0.0154627	0.0139405	0.0152262	0.0148765	0.0159102	6.39171e-06	0.0157833	0.0105666	1.00982	0.50046	0.962514	0.710293	-0.493514
1195	2-Bromo-5-(morpholin-4-ylsulfonyl)benzoic acid	2.21	level2			349.971	184.1	POS	C11H12BrNO5S					Benzenoids	苯环型化合物	Benzene and substituted derivatives	苯和取代衍生物	Benzenesulfonamides	苯磺酰胺	0.171336	0.209975	0.172845	0.184719	0.153592	0.148494	0.18162	0.161235	1.24884	0.22311	0.962514	0.872868	-0.196165
1196	3-(3-(.beta.-D-Glucopyranosyloxy)-2-hydroxyphenyl)propanoic acid	2.21	level2			343.105	168.6	NEG	C15H20O9					Organic oxygen compounds	有机含氧化合物	Organooxygen compounds	有机氧化合物	Carbohydrates and carbohydrate conjugates	碳水化合物和碳水化合物结合物	0.000870855	0.00114542	0.0223851	0.00813378	0.0204674	0.0231313	0.0232541	0.0222843	1.61395	0.183651	0.962514	2.73972	1.45403
1197	Carebastine	2.21	level2			500.275	122	POS	C32H37NO4					Benzenoids	苯环型化合物	Benzene and substituted derivatives	苯和取代衍生物	Diphenylmethanes		0.162803	0.199961	0.12743	0.163398	0.128269	0.172918	0.234308	0.178499	0.495668	0.70551	0.97951	1.09242	0.127525
1198	SM(d18:0/16:0)	2.21	level2			705.581	103.5	POS	C39H81N2O6P					Lipids and lipid-like molecules	脂质和类脂分子	Sphingolipids	鞘脂类	Phosphosphingolipids	鞘磷脂	21.5249	20.6461	11.4369	17.8693	10.0173	6.35817	12.6683	9.68128	1.64426	0.091854	0.962514	0.541782	-0.884214
1199	2,3,4-Trihydroxybenzaldehyde (4-chlorophenyl)hydrazone	2.21	level2			277.038	43.2	NEG	C13H11ClN2O3					Benzenoids	苯环型化合物	Phenols	酚类	Benzenetriols and derivatives	苯三酚及衍生物	0.122074	0.11864	0.141613	0.127443	0.134866	0.045193	0.0786999	0.086253	1.42221	0.203449	0.962514	0.676799	-0.5632
1200	4-Oxo-4-{[(4-phenyltetrahydro-2H-pyran-4-yl)methyl]amino}butanoic acid	2.21	level2			290.142	23.5	NEG	C16H21NO4					Lipids and lipid-like molecules	脂质和类脂分子	Fatty Acyls	脂肪酰类	Fatty amides	脂肪酸酰胺	0.157856	0.148601	0.641225	0.315894	0.575214	6.39171e-06	0.232205	0.269142	0.936782	0.850882	0.999442	0.852	-0.231075
1201	(7E)-11,12-Dihydroxy-13-methoxy-4,5,8-trimethyl-3-(2-methylpropyl)-3,3a,4,6a,9,10,11,12,13,14-decahydro-1H-cycloundeca[d]isoindole-1,15(2H)-dione	2.21	level2			432.277	16.9	NEG	C25H39NO5					Alkaloids and derivatives	生物碱和衍生物	Cytochalasans		Aspochalasins		0.122822	0.180427	0.236515	0.179921	0.266422	0.18123	0.252573	0.233408	1.22014	0.272952	0.962514	1.29728	0.37549
1202	Biotin-XX hydrazide	2.21	level2			485.289	16.6	POS	C22H40N6O4S					Organoheterocyclic compounds	有机杂环化合物	Biotin and derivatives		Biotin and derivatives		11.0728	2.21526e-05	12.9163	7.99637	12.681	16.5252	2.34116e-05	9.73538	0.086155	0.799839	0.99393	1.21748	0.283893
1203	4-(4-Mercaptophenoxy)phenyl hydrosulfide	2.21	level2			233.011	16.2	NEG	C12H10OS2					Benzenoids	苯环型化合物	Benzene and substituted derivatives	苯和取代衍生物	Diphenylethers		0.674138	0.564469	0.443528	0.560712	0.413127	0.491649	0.35268	0.419152	1.57652	0.142976	0.962514	0.747535	-0.419787
1204	4,6-Dimethyl-3-(4-methoxyphenyl)coumarin	2.21	level2			281.116	14.7	POS	C18H16O3					Phenylpropanoids and polyketides	苯丙素类和聚酮类	Isoflavonoids		Isoflav-3-enes		0.697241	2.21526e-05	0.833721	0.510328	0.85601	0.860649	0.99875	0.905137	0.995003	0.206855	0.962514	1.77364	0.826711
1205	PC(20:1(11Z)/22:4(7Z,10Z,13Z,16Z))	2.21	level2			864.645	33.1	POS	C50H90NO8P	HMDB0008318				Lipids and lipid-like molecules	脂质和类脂分子	Glycerophospholipids	甘油磷脂类	Glycerophosphocholines	甘油磷酸胆碱	0.3742	0.637481	0.449485	0.487055	0.478042	0.327479	0.262275	0.355932	1.31017	0.264199	0.962514	0.730783	-0.452484
1206	Peonidin_3-sambubioside_5-glucoside	2.21	level2			758.221	15.4	POS	C33H41O20	HMDB0041765				Phenylpropanoids and polyketides	苯丙素类和聚酮类	Flavonoids	黄酮类	Flavonoid glycosides		0.78757	0.562862	0.727003	0.692479	0.864839	0.816877	0.827302	0.836339	1.48548	0.104306	0.962514	1.20775	0.272319
1207	2-Hydroxy-3,5-dinitro-N'-[(E)-(5-nitrofuran-2-yl)methylidene]benzohydrazide	2.2	level2			364.018	220.3	NEG	C12H7N5O9					Benzenoids	苯环型化合物	Phenols	酚类	Nitrophenols		0.02732	0.0183313	0.0263089	0.0239868	0.0207498	0.0266958	0.0244448	0.0239635	0.0833801	0.994755	0.999955	0.999029	-0.00140115
1208	1H-Pyrazole-4-carboxylic acid, 3-(aminosulfonyl)-, ethyl ester	2.2	level2			218.022	180.9	NEG	C6H9N3O4S					Organoheterocyclic compounds	有机杂环化合物	Azoles	吡咯类	Pyrazoles	吡唑	0.0288252	6.18187e-06	0.0277959	0.0188758	0.0299794	0.0330361	0.0282312	0.0304156	0.97316	0.345658	0.962514	1.61136	0.688275
1209	Ethyl 4-amino-2-(methylthio)-1,3-thiazole-5-carboxylate	2.2	level2			219.026	174.2	POS	C7H10N2O2S2					Organoheterocyclic compounds	有机杂环化合物	Azoles	吡咯类	Thiazoles		0.201374	0.244721	0.210047	0.218714	0.208941	0.217893	0.271041	0.232625	0.761309	0.585298	0.962912	1.0636	0.088962
1210	[3-(hexadecanoyloxy)-2-[icosa-5.8.11-trienoyloxy]propoxy]({[2.3.4.5.6-pentahydroxycyclohexyl]oxy})phosphinic acid	2.2	level2			859.53	119.5	NEG	C45H81O13P	HMDB0009787				Lipids and lipid-like molecules	脂质和类脂分子	Glycerophospholipids	甘油磷脂类	Glycerophosphoinositols	甘油磷酸肌醇	1.60441	6.18187e-06	1.08942	0.897945	1.24286	6.39171e-06	0.554882	0.599251	0.125682	0.641518	0.969669	0.667358	-0.583468
1211	2-Fluoro-N-(1H-indazol-5-yl)benzamide	2.2	level2			254.077	46.3	NEG	C14H10FN3O					Benzenoids	苯环型化合物	Benzene and substituted derivatives	苯和取代衍生物	Benzoic acids and derivatives	苯甲酸及衍生物	0.126387	0.0698936	0.160434	0.118905	0.160122	0.145234	0.222876	0.176077	1.38138	0.182975	0.962514	1.48082	0.566401
1212	3-Glucosyliriflophenone	2.2	level2			407.1	29.2	NEG	C19H20O10					Organic oxygen compounds	有机含氧化合物	Organooxygen compounds	有机氧化合物	Carbohydrates and carbohydrate conjugates	碳水化合物和碳水化合物结合物	0.0499192	0.0141722	6.34955e-06	0.0213659	0.160833	0.0488275	0.091181	0.100281	1.22938	0.0926534	0.962514	4.69349	2.23066
1213	2-Acetylthiazole	2.2	level2			128.018	174	POS	C5H5NOS	HMDB0032964		24295-03-2		Organic oxygen compounds	有机含氧化合物	Organooxygen compounds	有机氧化合物	Carbonyl compounds	羰基化合物	0.148945	0.0643746	0.116581	0.109967	0.122284	0.0749055	0.0380241	0.0784047	1.08049	0.41407	0.962514	0.712986	-0.488054
1214	Erythronolactone	2.2	level2			117.019	116.8	NEG	C4H6O4	HMDB0000349		17675-99-9		Organoheterocyclic compounds	有机杂环化合物	Lactones		Gamma butyrolactones		0.118686	0.190171	0.121002	0.143286	0.122925	0.137822	0.154191	0.138313	0.00727871	0.852763	0.999442	0.965289	-0.0509665
1215	Nitrofurazone	2.2	level2			197.031	56.8	NEG	C6H6N4O4	HMDB0014480		59-87-0	C08042	Organoheterocyclic compounds	有机杂环化合物	Furans		Nitrofurans		0.577343	0.450105	0.488159	0.505202	0.463974	6.39171e-06	6.43614e-06	0.154662	1.69021	0.0924381	0.962514	0.306139	-1.70774
1216	N-(4-Iodophenyl)-N'-methylthiourea	2.19	level2			290.945	282.8	NEG	C8H9IN2S					Benzenoids	苯环型化合物	Benzene and substituted derivatives	苯和取代衍生物	N-phenylthioureas		6.87516e-06	0.023127	6.34955e-06	0.0077134	0.0160782	0.0152126	0.0156029	0.0156312	1.55092	0.412262	0.962514	2.0265	1.01899
1217	Sulprophos sulfoxide	2.19	level2			339.034	246.4	POS	C12H19O3PS3					Benzenoids	苯环型化合物	Benzene and substituted derivatives	苯和取代衍生物	Phenyl sulfoxides		0.118448	0.0925168	0.0813626	0.0974425	0.0717481	0.135515	0.073333	0.0935318	0.354951	0.876924	0.999955	0.959867	-0.0590935
1218	4(3H)-Quinazolinone, 5-fluoro-3-phenyl-2-[(1S)-1-(9H-purin-6-ylamino)propyl]-	2.19	level2			414.15	45.8	NEG	C22H18FN7O					Organoheterocyclic compounds	有机杂环化合物	Imidazopyrimidines	咪唑并嘧啶	Purines and purine derivatives	嘌呤和嘌呤衍生物	0.0200091	0.0133443	0.0368871	0.0234135	0.0376449	0.00690578	0.0347276	0.0264261	0.0831446	0.814806	0.996848	1.12867	0.174622
1219	Aspochalasin D	2.19	level2			402.269	27.6	POS	C24H35NO4					Alkaloids and derivatives	生物碱和衍生物	Cytochalasans		Aspochalasins		2.38509e-05	0.410494	0.294766	0.235094	0.465743	0.370037	0.390555	0.408778	1.1176	0.238919	0.962514	1.73878	0.798079
1220	L-Alaninamide, N-[2-[2-(hydroxyamino)-2-oxoethyl]-4-methyl-1-oxopentyl]-3-methyl-L-valyl-N-(2-aminoethyl)-	2.19	level2			416.285	25.8	POS	C19H37N5O5					Organic acids and derivatives	有机酸及其衍生物	Carboxylic acids and derivatives	羧酸及衍生物	Amino acids, peptides, and analogues	氨基酸、肽和类似物	2.38509e-05	0.494523	0.352823	0.282456	0.533524	0.530894	0.48949	0.517969	1.13215	0.249625	0.962514	1.8338	0.874838
1221	Di(2-thienyl)acetic acid	2.19	level2			222.991	25.8	NEG	C10H8O2S2					Organoheterocyclic compounds	有机杂环化合物	Heteroaromatic compounds		Heteroaromatic compounds		1.61282	1.65503	0.290805	1.18622	0.266603	0.872133	1.21701	0.785249	0.437705	0.489142	0.962514	0.661976	-0.595149
1222	2-(4-Chlorobenzyl)-1H-benzimidazole	2.19	level2			241.055	16.2	NEG	C14H11ClN2					Organoheterocyclic compounds	有机杂环化合物	Benzimidazoles		Benzimidazoles		0.130744	0.105775	0.118246	0.118255	0.11848	6.39171e-06	0.149855	0.0894471	0.997318	0.593857	0.963464	0.756393	-0.402793
1223	Koeniginequinone_A	2.19	level2			242.079	182.6	POS	C14H11NO3	HMDB0032085				Organoheterocyclic compounds	有机杂环化合物	Indoles and derivatives	吲哚和衍生物	Carbazoles		0.473032	0.543645	0.57434	0.530339	0.588878	2.49534e-05	0.420693	0.336532	1.04513	0.33665	0.962514	0.63456	-0.656171
1224	Nelarabine__	2.19	level2			296.099	103.2	NEG	C11H15N5O5	HMDB0015401		121032-29-9		Nucleosides, nucleotides, and analogues	核苷、核苷酸和类似物	Purine nucleosides	嘌呤核苷类	Purine nucleosides	嘌呤核苷类	0.048173	0.0402963	0.0658789	0.0514494	0.0681474	0.0695743	0.034591	0.0574376	0.253131	0.684756	0.975444	1.11639	0.15884
1225	1,2,4-Triazolidine-3-thione, 2-(4-chlorophenyl)-5-methyl-5-(3-methylbutyl)-	2.18	level2			296.098	168.4	NEG	C14H20ClN3S					Benzenoids	苯环型化合物	Benzene and substituted derivatives	苯和取代衍生物	Halobenzenes		6.87516e-06	0.0085924	0.0120005	0.0068666	0.0117882	0.00286882	6.43614e-06	0.00488782	0.150036	0.714188	0.981285	0.711825	-0.490406
1226	4-(4-(1H-Indol-3-yl)-3,6-dihydro-1(2H)-pyridinyl)-1H-pyrazolo[3,4-d]pyrimidine	2.18	level2			317.155	160.5	POS	C18H16N6					Organoheterocyclic compounds	有机杂环化合物	Indoles and derivatives	吲哚和衍生物	Indoles	吲哚	0.489125	0.44637	0.791638	0.575711	0.724809	0.524055	0.494542	0.581135	0.0885708	0.96885	0.999955	1.00942	0.013528
1227	N-Desmethylulipristal acetate	2.18	level2			462.267	119.6	POS	C29H35NO4					Lipids and lipid-like molecules	脂质和类脂分子	Steroids and steroid derivatives	甾类和甾类衍生物	Steroid esters		0.0427	0.0433186	0.0381742	0.0413976	0.0455432	0.0173224	0.269513	0.110793	0.561513	0.4761	0.962514	2.67631	1.42025
1228	1H-Indazole-4-carboxamide, N-[(1,2-dihydro-6-methyl-2-oxo-4-propyl-3-pyridinyl)methyl]-1-(1-methylethyl)-6-[2-(4-methyl-1-piperazinyl)-4-pyridinyl]-	2.18	level2			542.321	116.8	POS	C31H39N7O2	HMDB0252956				Organoheterocyclic compounds	有机杂环化合物	Diazinanes		Piperazines		8.03592	8.75484	3.67586	6.82221	3.80822	5.09363	7.65619	5.51935	0.528836	0.540354	0.962514	0.809026	-0.305741
1229	5-[2-(4-Chlorophenyl)hydrazin-1-ylidene]-2,2-dimethyl-1,3-dioxane-4,6-dione	2.18	level2			283.05	79	POS	C12H11ClN2O4					Benzenoids	苯环型化合物	Benzene and substituted derivatives	苯和取代衍生物	Phenylhydrazines		2.60721	2.41733	2.35453e-05	1.67485	2.57306	2.73982	2.61347	2.64212	0.964663	0.368197	0.962514	1.57752	0.657659
1230	p-Hydroxybenzoylecgonine	2.18	level2			304.121	27.2	NEG	C16H19NO5	HMDB0256040				Benzenoids	苯环型化合物	Benzene and substituted derivatives	苯和取代衍生物	Benzoic acids and derivatives	苯甲酸及衍生物	0.0213235	0.00888182	0.0560897	0.028765	0.0557875	6.39171e-06	0.0150594	0.0236178	0.945469	0.825289	0.997855	0.821059	-0.284442
1231	Lansioside_C	2.18	level2			589.403	25.8	POS	C35H56O7	HMDB0035103		87453-35-8		Organic oxygen compounds	有机含氧化合物	Organooxygen compounds	有机氧化合物	Carbohydrates and carbohydrate conjugates	碳水化合物和碳水化合物结合物	0.562124	0.536267	0.398581	0.498991	0.589544	0.700605	0.457772	0.58264	0.857618	0.388852	0.962514	1.16764	0.223593
1232	PA(16:1(9Z)/16:0)	2.18	level2			647.459	15.3	POS	C35H67O8P	HMDB0114855				Lipids and lipid-like molecules	脂质和类脂分子	Glycerophospholipids	甘油磷脂类	Glycerophosphates		0.197151	0.105459	0.276707	0.193106	0.120788	0.356322	0.0836118	0.186907	0.343235	0.952928	0.999955	0.9679	-0.0470705
1233	all-trans-13,14-Dihydroretinol	2.17	level2			289.257	309	POS	C20H32O	HMDB0011618		115797-14-3	C15492	Lipids and lipid-like molecules	脂质和类脂分子	Prenol lipids	异戊烯醇脂类	Retinoids		0.562158	0.26226	0.309294	0.377904	0.537798	0.292691	0.407412	0.412634	0.294695	0.781336	0.990715	1.0919	0.126843
1234	4-Benzyloxy-3-iodo-5-methoxybenzaldehyde	2.17	level2			369	257.4	POS	C15H13IO3					Benzenoids	苯环型化合物	Benzene and substituted derivatives	苯和取代衍生物	Benzoyl derivatives		0.324442	2.21526e-05	0.331197	0.218554	0.341857	0.372879	0.297075	0.33727	0.958872	0.346912	0.962514	1.54319	0.625919
1235	5-Chloro-6-(2,2,2-trifluoroethoxy)pyridine-3-carboxylic acid	2.17	level2			253.987	239.7	NEG	C8H5ClF3NO3					Organoheterocyclic compounds	有机杂环化合物	Pyridines and derivatives	吡啶及衍生物	Pyridinecarboxylic acids and derivatives	吡啶羧酸及衍生物	0.00144202	0.00300318	0.00137363	0.00193961	0.00102712	0.00238945	0.00133321	0.00158326	0.518458	0.624689	0.966559	0.816277	-0.29287
1236	Caylin-2	2.17	level2			647.213	217.9	NEG	C32H30F6N4O4					Phenylpropanoids and polyketides	苯丙素类和聚酮类	Stilbenes		Stilbenes		0.0110996	0.00251288	0.0138351	0.0091492	0.00547855	0.0235124	0.00883888	0.0126099	0.587651	0.622797	0.966158	1.37826	0.462844
1237	1,3,4-Thiadiazole-2-thiol	2.17	level2			118.971	199.2	POS	C2H2N2S2					Organoheterocyclic compounds	有机杂环化合物	Azoles	吡咯类	Thiadiazoles		0.0639932	0.0664724	0.0691919	0.0665525	0.0688864	2.49534e-05	0.0753579	0.0480897	1.00272	0.523943	0.962514	0.722584	-0.468764
1238	N-(1H-Indol-3-ylacetyl)alanine	2.17	level2			245.092	107.6	NEG	C13H14N2O3					Organic acids and derivatives	有机酸及其衍生物	Carboxylic acids and derivatives	羧酸及衍生物	Amino acids, peptides, and analogues	氨基酸、肽和类似物	0.0436674	0.0635178	0.0555164	0.0542339	0.0524014	0.0646827	0.0482971	0.0551271	0.228186	0.911894	0.999955	1.01647	0.0235669
1239	3-(2-(.beta.-D-Glucopyranosyloxy)-3-hydroxyphenyl)propanoic acid	2.17	level2			343.102	39	NEG	C15H20O9					Organic oxygen compounds	有机含氧化合物	Organooxygen compounds	有机氧化合物	Carbohydrates and carbohydrate conjugates	碳水化合物和碳水化合物结合物	6.87516e-06	0.0399679	0.00458076	0.0148519	0.00835856	0.0073791	0.0792127	0.0316501	1.11549	0.566546	0.962514	2.13106	1.09157
1240	3-(1,3-Dioxo-1,3-dihydro-2H-isoindol-2-yl)-3-(3-nitrophenyl)propanoic acid	2.17	level2			339.064	22.8	NEG	C17H12N2O6					Organoheterocyclic compounds	有机杂环化合物	Isoindoles and derivatives		Isoindolines		0.182977	0.157222	0.0950558	0.145085	0.0905335	0.0189414	0.150534	0.0866697	1.16478	0.274105	0.962514	0.597372	-0.743298
1241	Xanthosine	2.17	level2			285.233	326	POS	C10H12N4O6			146-80-5		Organoheterocyclic compounds	有机杂环化合物	Imidazopyrimidines	咪唑并嘧啶	Purines and purine derivatives	嘌呤和嘌呤衍生物	2.40528	1.99815	2.53106	2.3115	2.81371	2.77786	2.95981	2.85046	1.82818	0.0339555	0.962514	1.23317	0.302369
1242	Fenoxaprop-P-ethyl	2.16	level2			362.083	225.1	POS	C18H16ClNO5					Benzenoids	苯环型化合物	Benzene and substituted derivatives	苯和取代衍生物	2-phenoxypropionic acid esters		0.0966242	0.0601496	0.0772552	0.0780097	0.0749939	0.0583313	0.0832877	0.0722043	0.498003	0.674599	0.974368	0.925581	-0.111568
1243	N-trans-p-Coumaroyltyrosine	2.16	level2			326.102	162.3	NEG	C18H17NO5					Organic acids and derivatives	有机酸及其衍生物	Carboxylic acids and derivatives	羧酸及衍生物	Amino acids, peptides, and analogues	氨基酸、肽和类似物	0.00236917	0.000262025	0.0119995	0.0048769	0.0127714	0.00317159	0.00722954	0.00772417	0.991141	0.566213	0.962514	1.58383	0.663414
1244	6,7-Bis(3-hydroxyphenyl)pteridine-2,4-diamine	2.16	level2			345.109	162.1	NEG	C18H14N6O2					Organoheterocyclic compounds	有机杂环化合物	Pteridines and derivatives		Pteridines and derivatives		0.00206378	0.00192986	0.00698123	0.00365829	0.00727319	0.00240238	0.00451338	0.00472965	0.675696	0.648799	0.970838	1.29286	0.370564
1245	PE(22:2(13Z,16Z)/20:1(11Z))	2.16	level2			826.626	19.2	POS	C47H88NO8P	HMDB0009560			C00350	Lipids and lipid-like molecules	脂质和类脂分子	Glycerophospholipids	甘油磷脂类	Glycerophosphoethanolamines	磷脂酰乙醇胺	0.301464	0.273255	0.70106	0.42526	0.773836	0.438378	0.258942	0.490385	0.272113	0.766154	0.988251	1.15314	0.205571
1246	6-[(E)-2,8-Dihydroxy-5,7-dimethylnon-5-enyl]-4-hydroxy-3-methylpyran-2-one	2.16	level2			309.173	14.1	NEG	C17H26O5					Lipids and lipid-like molecules	脂质和类脂分子	Fatty Acyls	脂肪酰类	Fatty alcohols	脂肪醇	0.405609	0.357889	0.309983	0.357827	0.337091	0.297019	0.263859	0.299323	1.56269	0.167923	0.962514	0.836502	-0.257559
1247	Propanoic acid, 3-[(1,4-dihydro-5,8-dimethoxy-1,4-dioxo-2-naphthalenyl)thio]-	2.16	level2			321.046	12.7	NEG	C15H14O6S					Benzenoids	苯环型化合物	Naphthalenes	萘类	Naphthoquinones		0.157201	0.192744	0.240495	0.196813	0.225618	0.298935	0.159373	0.227975	0.632721	0.543385	0.962514	1.15833	0.21205
1248	8-Hydroxypinoresinol_4-glucoside	2.16	level2			537.191	144.1	POS	C26H32O12	HMDB0033282				Lignans, neolignans and related compounds	木脂素、新木脂素及相关化合物	Lignan glycosides		Lignan glycosides		0.926371	0.759101	0.986209	0.89056	1.09173	0.858473	0.876944	0.942382	0.438395	0.635289	0.968641	1.05819	0.0815978
1249	Chlorbromuron	2.15	level2			292.971	252.1	POS	C9H10BrClN2O2					Benzenoids	苯环型化合物	Benzene and substituted derivatives	苯和取代衍生物	N-phenylureas		0.160561	0.142063	0.0265299	0.109718	0.150254	0.0641938	0.098163	0.104204	0.172573	0.915534	0.999955	0.949739	-0.074397
1250	3-Amino-2-(4-chlorophenyl)-1-thioxo-1,2,5,6,7,8-hexahydro-4-isoquinolinecarbonitrile	2.15	level2			316.069	250.4	POS	C16H14ClN3S					Organoheterocyclic compounds	有机杂环化合物	Pyridines and derivatives	吡啶及衍生物	Aminopyridines and derivatives	氨基吡啶及衍生物	10.4708	5.74906	13.4384	9.88609	13.8383	9.81538	6.14362	9.93245	0.0831369	0.988978	0.999955	1.00469	0.00674927
1251	Nornidulin	2.15	level2			426.996	249.2	NEG	C19H15Cl3O5					Phenylpropanoids and polyketides	苯丙素类和聚酮类	Depsides and depsidones		Depsides and depsidones		0.221241	0.165551	0.175654	0.187482	0.172564	0.130784	0.147684	0.150344	1.61544	0.151591	0.962514	0.801913	-0.318482
1252	Edgeworoside A	2.15	level2			627.11	249.2	NEG	C33H24O13					Phenylpropanoids and polyketides	苯丙素类和聚酮类	Coumarins and derivatives	香豆素类及其衍生物	Coumarin glycosides		6.87516e-06	0.0876845	0.0949623	0.0608846	0.0865291	0.0826281	0.101244	0.0901336	1.08048	0.399299	0.962514	1.4804	0.565989
1253	His-Tyr	2.15	level2			319.136	155	POS	C15H18N4O4	HMDB0028897		35979-00-1		Organic acids and derivatives	有机酸及其衍生物	Carboxylic acids and derivatives	羧酸及衍生物	Amino acids, peptides, and analogues	氨基酸、肽和类似物	0.0706368	0.0594591	0.0638941	0.0646634	2.38091e-05	0.0710174	2.34116e-05	0.0236882	1.5382	0.223855	0.962514	0.366331	-1.44878
1254	6-Hydroxyeurycomalactone	2.15	level2			365.157	30	POS	C19H24O7					Lipids and lipid-like molecules	脂质和类脂分子	Steroids and steroid derivatives	甾类和甾类衍生物	Steroid lactones	甾体内酯	2.25376	1.98289	2.19417	2.14361	2.20904	1.92318	2.34116e-05	1.37742	1.10716	0.384431	0.962514	0.642569	-0.638076
1255	Helenine	2.15	level2			255.134	169	POS	C15H20O2	HMDB0035906		546-43-0	C09289	Lipids and lipid-like molecules	脂质和类脂分子	Prenol lipids	异戊烯醇脂类	Terpene lactones		0.0579666	0.0758344	0.0428828	0.0588946	0.0676646	0.026376	0.0368107	0.0436171	1.16406	0.383733	0.962514	0.740596	-0.433241
1256	Gentamicin	2.15	level2			478.328	118.4	POS	C21H43N5O7	HMDB0014936		1403-66-3		Organic oxygen compounds	有机含氧化合物	Organooxygen compounds	有机氧化合物	Carbohydrates and carbohydrate conjugates	碳水化合物和碳水化合物结合物	0.340542	2.21526e-05	0.351987	0.23085	0.458251	0.366463	0.145852	0.323522	0.89237	0.565344	0.962514	1.40144	0.486908
1257	Mintsulfide	2.15	level2			237.169	21.2	POS	C15H24S	HMDB0038151		72445-42-2		Lipids and lipid-like molecules	脂质和类脂分子	Prenol lipids	异戊烯醇脂类	Sesquiterpenoids		0.552457	0.410176	0.665843	0.542825	0.541611	0.500839	0.896165	0.646205	0.793306	0.517165	0.962514	1.19045	0.251504
1258	Isopeonidin_3-rutinoside	2.15	level2			610.184	15.4	POS	C28H33O15	HMDB0041753				Phenylpropanoids and polyketides	苯丙素类和聚酮类	Flavonoids	黄酮类	Flavonoid glycosides		6.47495	2.21526e-05	6.85087	4.44195	7.57771	7.52502	7.87923	7.66065	0.981122	0.28457	0.962514	1.72462	0.786275
1259	4-[3-Hexyl-4-(2-methoxy-2-oxoethyl)-2,5-dioxopyrrol-1-yl]butanoic acid	2.14	level2			338.163	49.5	NEG	C17H25NO6					Lipids and lipid-like molecules	脂质和类脂分子	Fatty Acyls	脂肪酰类	Fatty acids and conjugates	脂肪酸和聚合物	0.0957174	0.147494	0.10772	0.116977	0.095281	0.0512863	0.15248	0.0996824	0.681146	0.630041	0.967626	0.852152	-0.230817
1260	5-Heptenoic acid, 7-[(1R,2R,3S,5S)-2-[(1E,3R)-3-(2,3-dihydro-1H-inden-2-yl)-3-hydroxy-1-propen-1-yl]-3-fluoro-5-hydroxycyclopentyl]-, (5Z)-	2.14	level2			401.216	38.7	NEG	C24H31FO4					Lipids and lipid-like molecules	脂质和类脂分子	Fatty Acyls	脂肪酰类	Fatty acids and conjugates	脂肪酸和聚合物	0.109544	0.0328208	0.0902602	0.0775415	0.0865847	0.0321662	0.0916536	0.0701348	0.239146	0.816501	0.997108	0.904481	-0.144839
1261	(4-((1H-Imidazol-2-yl)methyl)piperidin-1-yl)(4'-fluoro-[1,1'-biphenyl]-4-yl)methanone	2.14	level2			362.163	18.5	NEG	C22H22FN3O					Benzenoids	苯环型化合物	Benzene and substituted derivatives	苯和取代衍生物	Benzoyl derivatives		0.0736813	6.18187e-06	0.117241	0.0636428	0.115107	5.6062	0.113943	1.94508	1.23123	0.412102	0.962514	30.5625	4.93369
1262	Thiamylal	2.14	level2			255.119	157.6	POS	C12H18N2O2S	HMDB0015285		77-27-0	C07846	Organoheterocyclic compounds	有机杂环化合物	Diazines	二氮杂苯	Pyrimidines and pyrimidine derivatives	嘧啶类和嘧啶类衍生物	0.125282	0.122817	0.116734	0.121611	0.106669	0.113733	0.129686	0.116696	0.654117	0.535844	0.962514	0.959583	-0.0595201
1263	Chloroquine	2.14	level2			318.178	13.1	NEG	C18H26ClN3	HMDB0014746		19851	C07625	Organoheterocyclic compounds	有机杂环化合物	Quinolines and derivatives	喹啉及衍生物	Aminoquinolines and derivatives		0.0455761	6.18187e-06	0.0179088	0.0211637	0.0122734	0.0251368	0.03926	0.0255567	0.89093	0.789293	0.992348	1.20757	0.272111
1264	[1-hydroxy-1-(4-methoxyphenyl)propan-2-yl] 4-methoxybenzoate	2.14	level2			315.126	12.8	NEG	C18H20O5	HMDB0038324		212516-34-2		Benzenoids	苯环型化合物	Benzene and substituted derivatives	苯和取代衍生物	Benzoic acids and derivatives	苯甲酸及衍生物	6.87516e-06	0.0908948	0.0960275	0.0623097	0.0894427	0.0301522	0.0125111	0.0440353	0.758205	0.66306	0.972304	0.706717	-0.500796
1265	Epalrestat	2.13	level2			320.039	235.7	POS	C15H13NO3S2					Organic acids and derivatives	有机酸及其衍生物	Carboxylic acids and derivatives	羧酸及衍生物	Amino acids, peptides, and analogues	氨基酸、肽和类似物	0.168141	0.0249869	0.100884	0.0980041	0.16455	0.0740922	0.219937	0.15286	0.894658	0.407299	0.962514	1.55973	0.641294
1266	9-(4-Hydroxy-3,5-dimethoxyphenyl)-8-oxo-5,5a,6,8,8a,9-hexahydrofuro[3',4':6,7]naphtho[2,3-d][1,3]dioxol-4-yl hexopyranoside	2.13	level2			561.166	215.2	NEG	C27H30O13					Lignans, neolignans and related compounds	木脂素、新木脂素及相关化合物	Lignan glycosides		Lignan glycosides		0.00847872	0.00135142	0.00828929	0.00603981	0.00350068	0.0115255	0.00501495	0.00668038	0.390066	0.859722	0.999843	1.10606	0.145427
1267	3-Thiophenecarboxamide, 2-[(aminocarbonyl)amino]-5-(4-fluorophenyl)-	2.13	level2			278.043	180.9	NEG	C12H10FN3O2S					Organoheterocyclic compounds	有机杂环化合物	Thiophenes		Thiophene carboxylic acids and derivatives		0.0324122	6.18187e-06	0.0329871	0.0218018	0.0338943	6.39171e-06	0.0326476	0.0221828	0.0531586	0.981631	0.999955	1.01747	0.0249909
1268	1-(4-Bromophenyl)-5-methyl-1H-pyrazole-4-carboxylic acid	2.13	level2			278.98	172.8	NEG	C11H9BrN2O2					Organoheterocyclic compounds	有机杂环化合物	Azoles	吡咯类	Pyrazoles	吡唑	0.0397762	0.0173183	0.0343742	0.0304896	0.0410419	0.0254783	0.0178027	0.0281076	0.400583	0.816622	0.99712	0.921876	-0.117355
1269	2-Bromo-5-fluoro-N-(2-furylmethyl)benzamide	2.13	level2			297.991	152	POS	C12H9BrFNO2					Benzenoids	苯环型化合物	Benzene and substituted derivatives	苯和取代衍生物	Benzoic acids and derivatives	苯甲酸及衍生物	0.0464845	0.0675038	0.0553346	0.0564409	0.0302763	0.0623078	0.0326296	0.0417379	1.19148	0.286777	0.962514	0.739497	-0.435384
1270	N-Phenyl-N'-(3-pyridinylmethyl)thiourea	2.13	level2			242.077	134.8	NEG	C13H13N3S					Benzenoids	苯环型化合物	Benzene and substituted derivatives	苯和取代衍生物	N-phenylthioureas		0.0210974	0.0173348	0.0107373	0.0163898	0.0101938	0.0213286	0.0221093	0.0178772	0.305471	0.776458	0.98986	1.09075	0.125321
1271	Adenosine 5'-(tetrahydrogen triphosphate), 3'-(4-benzoylbenzoate)	2.13	level2			716.061	76.6	POS	C24H24N5O15P3					Nucleosides, nucleotides, and analogues	核苷、核苷酸和类似物	Purine nucleotides	嘌呤核苷酸类	Purine ribonucleotides	嘌呤核糖核苷酸	2.38509e-05	1.03239	1.05894	0.69712	1.07582	1.10599	1.03541	1.07241	1.08831	0.394328	0.962514	1.53834	0.621377
1272	Metolachlor OA	2.13	level2			278.142	24	NEG	C15H21NO4					Organic acids and derivatives	有机酸及其衍生物	Carboxylic acids and derivatives	羧酸及衍生物	Amino acids, peptides, and analogues	氨基酸、肽和类似物	0.111955	0.108022	6.34955e-06	0.0733278	6.30815e-06	0.149933	0.135411	0.0951166	0.112936	0.735718	0.983942	1.29714	0.375337
1273	pongamol	2.13	level2			317.083	235	POS	C18H14O4	HMDB0253968				Phenylpropanoids and polyketides	苯丙素类和聚酮类	Linear 1,3-diarylpropanoids		Chalcones and dihydrochalcones		0.316493	0.196476	0.327059	0.280009	0.333148	0.321142	0.347121	0.333804	1.12156	0.274741	0.962514	1.19212	0.253525
1274	5-Hydroxybuspirone	2.13	level2			402.254	18.9	POS	C21H31N5O3	HMDB0061109				Organoheterocyclic compounds	有机杂环化合物	Diazinanes		Piperazines		1.58314	2.21526e-05	1.64255	1.07524	1.43843	0.829966	2.36093	1.54311	0.925794	0.539446	0.962514	1.43513	0.521184
1275	2-[(6-Amino-9H-purin-8-yl)thio]acetic acid	2.12	level2			224.023	217.9	NEG	C7H7N5O2S					Organoheterocyclic compounds	有机杂环化合物	Imidazopyrimidines	咪唑并嘧啶	Purines and purine derivatives	嘌呤和嘌呤衍生物	0.012719	0.017516	0.0172624	0.0158325	0.0197211	0.0131636	0.021042	0.0179756	0.729502	0.499787	0.962514	1.13536	0.183153
1276	2-Docosahexaenoyl-1-stearoyl-sn-glycero-3-phosphoserine	2.12	level2			834.519	120.8	NEG	C46H78NO10P	HMDB0010167			C02737	Lipids and lipid-like molecules	脂质和类脂分子	Glycerophospholipids	甘油磷脂类	Glycerophosphoserines	甘油磷酸丝氨酸	0.340736	6.18187e-06	0.180808	0.17385	0.20999	0.0427957	0.146343	0.133043	0.735462	0.729051	0.982716	0.765274	-0.385952
1277	Ethyl_2-(methyldithio)propionate	2.12	level2			181.033	88.9	POS	C6H12O2S2	HMDB0038896		23747-43-5		Organic acids and derivatives	有机酸及其衍生物	Carboxylic acids and derivatives	羧酸及衍生物	Carboxylic acid derivatives	羧酸衍生物	0.271859	0.0410764	0.277756	0.196897	0.277041	0.282664	0.273146	0.277617	0.96703	0.409119	0.962514	1.40996	0.495653
1278	3,4-di-O-caffeoylquinic acid	2.12	level2			555.177	15.8	POS	C25H24O12	HMDB0030707		57378-72-0		Organic oxygen compounds	有机含氧化合物	Organooxygen compounds	有机氧化合物	Alcohols and polyols		0.535818	0.354608	0.48546	0.458629	0.35822	0.488228	0.451601	0.432683	0.339841	0.716064	0.981508	0.943427	-0.0840167
1279	(3R,6aR,7S,12aS)-5,6,6a,7,8-Pentahydroxy-3-methyl-3,4,5,6,7,12a-hexahydro-2H-benzo[a]anthracene-1,12-dione	2.11	level2			359.117	181.8	NEG	C19H20O7					Benzenoids	苯环型化合物	Tetralins		Tetralins		0.000252695	0.000514726	0.000300122	0.000355848	0.00039993	0.000310361	0.000466387	0.000392226	0.644159	0.713942	0.981285	1.10223	0.140426
1280	Senkirkin	2.11	level2			366.194	131.5	POS	C19H27NO6											0.0633551	0.024215	0.0960783	0.0612161	0.0976838	0.0179278	0.0660501	0.0605539	0.203475	0.984047	0.999955	0.989182	-0.0156921
1281	Vincosamide	2.11	level2			497.198	123.7	NEG	C26H30N2O8					Organoheterocyclic compounds	有机杂环化合物	Indoles and derivatives	吲哚和衍生物	Pyridoindoles		0.00086849	6.18187e-06	6.34955e-06	0.000293674	0.0641074	0.00405301	0.00753486	0.0252318	1.81808	0.328581	0.962514	85.9176	6.42488
1282	Topiramate	2.11	level2			338.096	144	NEG	C12H21NO8S	HMDB0005034		97240-79-4	C07502	Organoheterocyclic compounds	有机杂环化合物	Dioxolopyrans		Dioxolopyrans		0.0123459	0.00974218	0.0126479	0.0115787	0.0127245	0.00940271	0.0117049	0.0112774	0.33086	0.834036	0.99863	0.973978	-0.0380389
1283	Isodesmosine	2.11	level2			526.292	117.9	POS	C24H39N5O8	HMDB0000739		991-01-5		Organic acids and derivatives	有机酸及其衍生物	Carboxylic acids and derivatives	羧酸及衍生物	Tetracarboxylic acids and derivatives		0.177286	0.171095	0.247242	0.198541	0.273431	2.49534e-05	0.31723	0.196895	0.9173	0.987922	0.999955	0.99171	-0.0120104
1284	4,4'-Difluorobiphenyl-2,2'-dicarboxylic acid	2.1	level2			279.044	234.9	POS	C14H8F2O4					Benzenoids	苯环型化合物	Benzene and substituted derivatives	苯和取代衍生物	Biphenyls and derivatives		0.356993	0.247546	0.359384	0.321308	0.384608	0.370642	0.39062	0.381957	1.30591	0.179822	0.962514	1.18876	0.249455
1285	4-Bromo-1-(4-morpholinosulfonylphenyl)pyrazole	2.1	level2			371.998	231.8	POS	C13H14BrN3O3S					Organoheterocyclic compounds	有机杂环化合物	Azoles	吡咯类	Pyrazoles	吡唑	0.11274	0.0698783	0.107068	0.0965621	0.127247	0.104151	0.131813	0.12107	1.25752	0.198919	0.962514	1.25381	0.326314
1286	1-(2-Chlorobenzoyl)proline	2.1	level2			252.046	202.7	NEG	C12H12ClNO3					Organic acids and derivatives	有机酸及其衍生物	Carboxylic acids and derivatives	羧酸及衍生物	Amino acids, peptides, and analogues	氨基酸、肽和类似物	0.0202479	0.0224773	0.0403074	0.0276776	0.0393309	0.0325347	0.0221529	0.0313395	0.533565	0.673787	0.974285	1.13231	0.179266
1287	Phe-His	2.1	level2			303.141	131.5	POS	C15H18N4O3	HMDB0028997		33367-37-2		Organic acids and derivatives	有机酸及其衍生物	Carboxylic acids and derivatives	羧酸及衍生物	Amino acids, peptides, and analogues	氨基酸、肽和类似物	0.456876	0.301015	0.458314	0.405402	0.472793	0.501207	0.615826	0.529942	1.48123	0.141361	0.962514	1.3072	0.386482
1288	7-Chloro-1H-indole-2,3-dione	2.1	level2			179.988	59	NEG	C8H4ClNO2					Organoheterocyclic compounds	有机杂环化合物	Indoles and derivatives	吲哚和衍生物	Indolines	吲哚啉	0.514213	0.346659	0.463937	0.441603	0.461168	0.345262	0.217067	0.341166	1.26127	0.308795	0.962514	0.772562	-0.372277
1289	N-Arachidonoyl-L-serine	2.1	level2			392.275	25.4	POS	C23H37NO4					Organic acids and derivatives	有机酸及其衍生物	Carboxylic acids and derivatives	羧酸及衍生物	Amino acids, peptides, and analogues	氨基酸、肽和类似物	0.0324044	0.0216101	2.35453e-05	0.0180127	0.0205616	0.0264248	2.34116e-05	0.01567	0.143091	0.85976	0.999843	0.86994	-0.201012
1290	Piplartine	2.1	level2			316.115	225	NEG	C17H19NO5	HMDB0030341		20069-09-4	C10166	Phenylpropanoids and polyketides	苯丙素类和聚酮类	Cinnamic acids and derivatives	肉桂酸及其衍生物	Cinnamic acids and derivatives		0.0769339	0.0529539	0.0617457	0.0638778	0.0587845	0.0489454	0.0626828	0.0568042	0.932426	0.432295	0.962514	0.889264	-0.169317
1291	4-Hydroxy-3-oxo-1,3-dihydronaphtho[2,3-c]furan-5-yl .beta.-D-glucopyranoside	2.09	level2			377.084	224.8	NEG	C18H18O9					Organic oxygen compounds	有机含氧化合物	Organooxygen compounds	有机氧化合物	Carbohydrates and carbohydrate conjugates	碳水化合物和碳水化合物结合物	0.0241724	0.00887093	0.023299	0.0187808	0.0102084	0.0311202	0.0155337	0.0189541	0.0165454	0.983747	0.999955	1.00923	0.013256
1292	1-(4-Chlorophenyl)-3,5-dimethyl-1H-pyrazole-4-carboxylic acid	2.09	level2			249.046	218	NEG	C12H11ClN2O2					Organoheterocyclic compounds	有机杂环化合物	Azoles	吡咯类	Pyrazoles	吡唑	0.0107879	0.00970946	0.00971457	0.0100707	0.00962804	6.39171e-06	0.00988362	0.00650602	1.03936	0.387231	0.962514	0.646037	-0.630311
1293	5a-Hydroxy-4-(4-oxoquinazolin-3(4H)-yl)-2-(propan-2-yl)-4,5,5a,9c-tetrahydro-3H-2a,9b-diazacyclopenta[jk]fluorene-1,3(2H)-dione	2.09	level2			429.161	158.4	NEG	C24H22N4O4					Organoheterocyclic compounds	有机杂环化合物	Indoles and derivatives	吲哚和衍生物	Pyridoindoles		0.000391831	0.0195155	0.00921621	0.00970785	0.0105618	0.000254767	0.00852487	0.00644715	0.207964	0.635261	0.968641	0.664117	-0.59049
1294	5-(Diaminomethylideneamino)-2-(3,4'-dihydroxy-4,4,7,8a-tetramethyl-6'-oxospiro[2,3,4a,5,6,7-hexahydro-1H-naphthalene-8,2'-3,8-dihydrofuro[2,3-e]isoindole]-7'-yl)pentanoic acid	2.09	level2			543.324	116.8	POS	C29H42N4O6					Organic acids and derivatives	有机酸及其衍生物	Carboxylic acids and derivatives	羧酸及衍生物	Amino acids, peptides, and analogues	氨基酸、肽和类似物	1.68089	2.21526e-05	1.05882	0.913243	1.17022	0.970809	2.29865	1.47989	0.961456	0.427019	0.962514	1.62048	0.696423
1295	Piericidin C1	2.09	level2			432.28	21	POS	C25H37NO5					Lipids and lipid-like molecules	脂质和类脂分子	Prenol lipids	异戊烯醇脂类	Sesquiterpenoids		2.38509e-05	0.873134	0.912501	0.59522	0.969527	1.0528	2.34116e-05	0.674118	0.00482652	0.869456	0.999955	1.13255	0.17958
1296	Hexamethylquercetagetin	2.09	level2			401.128	225.6	NEG	C21H22O8	HMDB0029308		1251-84-9		Phenylpropanoids and polyketides	苯丙素类和聚酮类	Flavonoids	黄酮类	O-methylated flavonoids		0.0166468	0.00457332	0.0180956	0.0131052	0.00823578	0.0173352	0.0111577	0.0122429	0.110455	0.872859	0.999955	0.934197	-0.0982006
1297	beta-Doradecin	2.09	level2			581.407	24.7	POS	C40H52O3	HMDB0039143		31460-54-5		Lipids and lipid-like molecules	脂质和类脂分子	Prenol lipids	异戊烯醇脂类	Tetraterpenoids		0.370287	0.378767	2.35453e-05	0.249693	0.379761	0.452561	2.34116e-05	0.277448	0.0965793	0.889661	0.999955	1.11116	0.152066
1298	2,6-Difluoro-3-[(propylsulfonyl)amino]benzoic acid	2.08	level2			280.048	101.7	POS	C10H11F2NO4S					Benzenoids	苯环型化合物	Benzene and substituted derivatives	苯和取代衍生物	Sulfanilides		0.0800476	0.00105361	2.35453e-05	0.0270416	2.38091e-05	0.00259943	0.019037	0.00722009	0.0283174	0.506031	0.962514	0.267	-1.90509
1299	2'-Deoxyadenosine-5'-diphosphate	2.08	level2			426.021	264	NEG	C10H15N5O9P2					Nucleosides, nucleotides, and analogues	核苷、核苷酸和类似物	Purine nucleotides	嘌呤核苷酸类	Purine deoxyribonucleotides		0.00918387	0.0182006	0.00482268	0.0107357	0.00900617	0.0327526	0.0134702	0.0184096	1.03511	0.406639	0.962514	1.7148	0.778041
1300	Acetamiprid	2.08	level2			223.071	4.4	POS	C10H11ClN4	HMDB0247906				Organoheterocyclic compounds	有机杂环化合物	Pyridines and derivatives	吡啶及衍生物	Halopyridines		0.000690973	0.00711133	0.00482169	0.004208	0.00176397	2.49534e-05	0.00536528	0.00238473	0.848936	0.498092	0.962514	0.566715	-0.819306
1301	3-(4-Chlorophenyl)-7-hydroxy-2-methyl-4H-chromen-4-one	2.07	level2			287.044	77.9	POS	C16H11ClO3					Phenylpropanoids and polyketides	苯丙素类和聚酮类	Isoflavonoids		Isoflav-2-enes		2.69651	2.48633	2.64478	2.60921	2.62126	2.86273	2.67876	2.72092	1.12369	0.311181	0.962514	1.04281	0.060481
1302	m-Hydroxycocaine	2.07	level2			320.153	13.8	POS	C17H21NO5					Benzenoids	苯环型化合物	Benzene and substituted derivatives	苯和取代衍生物	Benzoic acids and derivatives	苯甲酸及衍生物	0.213408	0.150917	0.272078	0.212134	0.26858	0.138813	0.138918	0.182104	0.786455	0.617886	0.965579	0.858436	-0.220218
1303	Serine-Cholic Acid	2.07	level2			460.312	26.3	POS	C27H45NO7	HMDB0242388				Lipids and lipid-like molecules	脂质和类脂分子	Steroids and steroid derivatives	甾类和甾类衍生物	Bile acids, alcohols and derivatives	胆汁酸类、醇类及其衍生物	2.38509e-05	0.406348	0.253938	0.220103	0.429511	0.406245	0.385548	0.407102	1.13775	0.254487	0.962514	1.84959	0.887209
1304	2-Hydroxy-4-(prop-2-en-1-yl)phenyl 6-O-.beta.-D-glucopyranosyl-.beta.-D-glucopyranoside	2.06	level2			473.161	223.9	NEG	C21H30O12					Organic oxygen compounds	有机含氧化合物	Organooxygen compounds	有机氧化合物	Carbohydrates and carbohydrate conjugates	碳水化合物和碳水化合物结合物	0.0249813	0.00866224	0.0399756	0.0245397	0.0170278	0.0321484	0.0163333	0.0218365	0.0173194	0.807946	0.995053	0.889844	-0.168376
1305	17-Phenyltrinor-13,14-dihydroprostaglandin A2	2.06	level2			371.227	30.6	POS	C23H30O4					Lipids and lipid-like molecules	脂质和类脂分子	Fatty Acyls	脂肪酰类	Eicosanoids	类花生酸	1.78686	1.67333	1.72661	1.72893	1.94199	1.7905	2.34116e-05	1.24417	1.08312	0.518429	0.962514	0.719619	-0.474695
1306	Ethyl 4-O-(4-carboxy-3-hydroxy-3-methylbutanoyl)-.beta.-D-glucopyranoside	2.06	level2			351.126	13.4	NEG	C14H24O10					Lipids and lipid-like molecules	脂质和类脂分子	Saccharolipids		Saccharolipids		0.336336	0.479957	0.501993	0.439429	0.481336	0.550675	0.393781	0.475264	0.606319	0.630823	0.967626	1.08155	0.113101
1307	Mebeverine	2.06	level2			430.265	136.4	POS	C25H35NO5	HMDB0254388				Benzenoids	苯环型化合物	Benzene and substituted derivatives	苯和取代衍生物	Benzoic acids and derivatives	苯甲酸及衍生物	0.270425	0.182213	0.229861	0.2275	0.249357	0.248721	0.294959	0.264346	1.16498	0.283033	0.962514	1.16196	0.216559
1308	N-3-Oxohexadec-11Z-enoyl-L-homoserine lactone	2.05	level2			352.244	160.2	POS	C20H33NO4					Organic acids and derivatives	有机酸及其衍生物	Carboxylic acids and derivatives	羧酸及衍生物	Amino acids, peptides, and analogues	氨基酸、肽和类似物	0.631082	1.28704	2.03183	1.31665	2.0902	1.00977	0.826505	1.30883	0.0165508	0.989611	0.999955	0.994056	-0.00860105
1309	N-(3,4-Dimethoxyphenyl)-N-(4-quinazolinyl)amine	2.05	level2			282.12	14.5	POS	C16H15N3O2					Organoheterocyclic compounds	有机杂环化合物	Diazanaphthalenes	二氮杂萘	Benzodiazines	苯并二嗪	0.0747842	0.0464289	0.091905	0.0710394	0.098658	0.0945334	0.112909	0.102033	1.53748	0.0974215	0.962514	1.43629	0.522352
[truncated: 151 more rows]

## Sheet: SM vs. NC
ID	MS2 name	MS2 score	level	MS1 name	MS1 ppm	mz	rt	type	Formula	HMDB	Chinese.Name	CAS	KEGG COMPOUND ID	Super.Class	Superclass.Chinese	Class	Class.Chinese	Sub.Class	Subclass.Chinese	NC_1	NC_2	NC_3	MEAN NC	SM_1	SM_2	SM_3	MEAN SM	VIP	P-VALUE	Q-VALUE	FOLD CHANGE	LOG_FOLDCHANGE
[truncated: 1,460 more rows]

[truncated: 1 more sheets: SM vs. TBSS]
